# Supplementary material for: Reduced Nicotine Cigarettes and E-Cigarettes in High-Risk Populations: 3 Randomized Clinical Trials
Source: PubMed Central journal article supplement (PMC11380105; doi:10.1001/jamanetworkopen.2024.31731), 2024-09-06
Supplement: jamanetwopen-e2431731-s001.pdf [file jamanetwopen-e2431731-s001.pdf]

# eSupplement 1

eSupplement 1 was prepared by the authors to provide interested readers additional protocol and statistical-analysis details on the three randomized, controlled trials reported in Higgins ST, Sigmon SC, Tidey JW, et al. *Reduced Nicotine Cigarettes and E-Cigarettes in High-Risk Populations: 3 Randomized Clinical Trials*

Protocols for each of the three trials are detailed separately below followed by the Statistical Analysis Plan for those trials at the end of each protocol.

The protocol information provided below is what local Institutional Review Boards at each research site approved.

## **Summary of Protocol Modifications:**

**10-2-20** Two modifications were made across the three trials. (1) We stipulated that individuals must have access to the technology necessary to complete the initial study eligibility assessment. (2) Deleted mention of a debit card and an e-cigarette sampling session and associated questionnaire which were carried over from the original in-person protocol.

**10-12-20** Made three protocol modifications across the three trials. (1) Moved to salivary rather than urine drug toxicology testing to allow observed specimen collection. Urine specimens were retained as a back-up should someone be able to provide adequate saliva for valid testing. (2) Stipulated that should a participant fail to provide a first void urine specimen, arrangements to get that specimen on another day will be made rather than substituting a spot urine specimen. (3) Added an e-cigarette flavor rating questionnaire.

**11-30-20** Modified curbside assessments to include a lab option for inclement weather.

**2-2-21** Modified protocols to allow increases in weekly supply of e-liquid pods if a participant consistently uses more than their baseline determined amount.

**3-17-21** Substituted breath CO for a urine specimen to confirm abstinence in the assessments completed 30 days after trial completion.

**5-11-21** Increased maximal participant compensation to more equitably compensate participants for the considerable time commitment the trials require.

**6-27-22** (1) Provided greater detail to the protocols regarding study policy on contraception use. (2) Updated the Data Safety Monitoring Board roster.

**1-23-23** Increased maximal participant compensation to include bonuses for every two consecutive study visits completed on schedule.

47 **Reduced Nicotine Cigarettes and E-Cigarettes in High-Risk Populations: 3 Randomized Clinical**  
48 **Trials**

49 Stephen T. Higgins, PhD<sup>1\*</sup>, Stacey C. Sigmon, PhD<sup>1</sup>, Jennifer W. Tidey, PhD<sup>2</sup>, Sarah H.  
50 Heil, PhD<sup>1</sup>, Diann E. Gaalema, PhD<sup>1</sup>, Dustin C. Lee, PhD<sup>3</sup>, Michael J. DeSarno, MS<sup>1</sup>,  
51 Elias M. Klemperer, PhD<sup>1</sup>, Katherine E. Menson, DO<sup>1</sup>, Patricia A. Cioe, PhD<sup>2</sup>, Shirley  
52 Plucinski, MPH<sup>1</sup>, Rhiannon C. Wiley, MA<sup>1</sup>, Eva Orr, MPH<sup>1</sup>

53  
54 <sup>1</sup> UVM Tobacco Center of Regulatory Science, University of Vermont, Burlington, VT

55 <sup>2</sup> Center for Alcohol and Addiction Studies, Brown University, Providence, RI

56 <sup>3</sup> Behavioral Pharmacology Research Unit, Johns Hopkins University School of Medicine,  
57 Baltimore, MD

58  
59  
60  
61  
62  
63  
64  
65  
66  
67  
68  
69  
70  
71  
72  
73  
74  
75  
76  
77  
78  
79  
80  
81  
82  
83  
84  
85  
86  
87  
88

**eSupplement 1**

89 **Table of Contents**

90  
91

| 92 | <b>Content</b>                                                                    | <b>Page Number</b> |
|----|-----------------------------------------------------------------------------------|--------------------|
| 93 |                                                                                   |                    |
| 94 | eProtocol: Smokers with Affective Disorders.....                                  | 4                  |
| 95 | eProtocol: Smokers with Opioid Use Disorder.....                                  | 47                 |
| 96 | eProtocol: Smokers with Socioeconomic Disadvantage (women of reproductive age) .. | 95                 |

97 **STUDY PROTOCOL: SMOKERS WITH AFFECTIVE DISORDERS**

98 **Table of Contents**

99 1. OBJECTIVE ..... 7

100 2. SIGNIFICANCE..... 8

101 2.1 Affective Disorders (AD) and Smoking..... 8

102 2.2 Relevance of the Project to the Integrative Theme and Goals of the TCORS ..... 9

103 2.3 Relevance to the Scientific Domains and Priorities of the FDA CTP ..... 9

104 2.4 How Study Outcomes Will Improve Scientific Knowledge Related to the Manufacture,  
105 Distribution, and Marketing of Tobacco Products..... 9

106 3. RATIONALE..... 9

107 3.1 Effects of Nicotine Reduction in Smokers With AD ..... 9

108 3.2 E-Cig Use..... 11

109 3.3 E-Cig Effects on Smoking ..... 11

110 3.4 Mechanisms of E-Cig Effects ..... 11

111 3.5 Importance of E-Cig Flavors ..... 12

112 3.6 Products to be Tested..... 12

113 3.7 Summary..... 12

114 4. PROJECT STUDY METHODS ..... 13

115 5. STUDY SCREENING PROCEDURES ..... 13

116 5.1 Participants ..... 13

117 5.2 Recruitment..... 13

118 5.3 Informed Consent Process..... 15

119 5.4 Screening Measures ..... 15

120 5.5 Suicidality/Mental Health Monitoring..... 17

121 5.6 Inclusion/Exclusion Criteria ..... 17

122 5.7 Eligibility Determination..... 19

123 6. STUDY BASELINE PROCEDURES ..... 20

124 6.1 Visit Scheduling Requirements for Baseline Period..... 21

125 6.2 Measures/Assessments ..... 21

126 6.3 E-Cigarette Training Sessions (Baseline 2) ..... 23

127 6.4 Interactive Voice Response System ..... 23

128 7. STUDY EXPERIMENTAL PROCEDURES..... 24

129 7.1 Experimental Period..... 24

130 7.2 Experimental Visits Weeks 1, 3, 5, 7, 9, 11, 13, and 15 Procedures ..... 25

131 7.2.A. Measures/Assessments ..... 25

132 7.3 Experimental Visits Weeks 2, 4, 6, 8, 10, 12, 14, and 16 Procedures ..... 25

133 7.3.A. Measures/Assessments ..... 25

|     |                                                                                                  |    |
|-----|--------------------------------------------------------------------------------------------------|----|
| 134 | 7.4 Interactive Voice Response System .....                                                      | 26 |
| 135 | 7.5 Variable Incentive Program.....                                                              | 27 |
| 136 | 7.6 Product and Procedures Compliance Review Sessions .....                                      | 27 |
| 137 | 7.7 Quit Attempts During the Study Protocol .....                                                | 28 |
| 138 | 7.7.A. If a participant is currently abstaining from smoking with the intention to quit.....     | 28 |
| 139 | 7.7.B. If a participant is planning to quit smoking, but has not initiated the quit attempt..... | 28 |
| 140 | 7.8 Abstinance Assessment Session .....                                                          | 29 |
| 141 | 7.8.A. Participants Who Meet Criteria for Abstinance.....                                        | 29 |
| 142 | 7.8.A.1. Measures/Assessments .....                                                              | 29 |
| 143 | 7.8.B. Participants Who Do Not meet Criteria for Abstinance.....                                 | 29 |
| 144 | 7.8.B.1. Measures/Assessments .....                                                              | 30 |
| 145 | 7.9 Participant Compensation .....                                                               | 30 |
| 146 | 7.10 End of Study.....                                                                           | 30 |
| 147 | 7.11 30-day Follow Up Phone Call.....                                                            | 31 |
| 148 | 8. STUDY RANDOMIZATION .....                                                                     | 31 |
| 149 | 8.1 Randomization Process .....                                                                  | 31 |
| 150 | 8.2 Study Product Administration.....                                                            | 31 |
| 151 | 8.3 Guidelines for Reporting Other Nicotine Product Use.....                                     | 32 |
| 152 | 8.4 Study Product Accountability .....                                                           | 32 |
| 153 | 9. STUDY 3 STATISTICAL METHODS AND SAMPLE SIZE .....                                             | 32 |
| 154 | 9.1 Statistical Methods .....                                                                    | 32 |
| 155 | 9.2 Sample Size .....                                                                            | 33 |
| 156 | 10. POTENTIAL RISKS OF PARTICIPATION .....                                                       | 34 |
| 157 | 10.1 Risks of Participation .....                                                                | 34 |
| 158 | 10.2 Avoiding Risk to Fetus .....                                                                | 35 |
| 159 | 10.3 Expected Benefits of Participation .....                                                    | 36 |
| 160 | 11. PROTECTION AGAINST RISK .....                                                                | 36 |
| 161 | 11.1 Data Collection Protections.....                                                            | 36 |
| 162 | 11.2 Data Storage .....                                                                          | 37 |
| 163 | 12. ADVERSE EVENTS.....                                                                          | 37 |
| 164 | 13. WITHDRAWAL OR MONITORING OF PARTICIPANTS.....                                                | 37 |
| 165 | 14. DATA SAFETY MONITORING BOARD .....                                                           | 38 |
| 166 | 15. INVESTIGATIONAL TOBACCO PRODUCT .....                                                        | 39 |
| 167 | 16. CERTIFICATE OF CONFIDENTIALITY.....                                                          | 39 |
| 168 | 17. OUTCOME VARIABLES.....                                                                       | 40 |
| 169 | 18. REFERENCES.....                                                                              | 41 |

170  
171

172

## Abbreviations

- 173 • 3HC: 3-hydroxycotinine
- 174 • BAL: Breath alcohol levels
- 175 • BDI: Beck's Depression Inventory
- 176 • BMI: Body Mass Index
- 177 • BP: Blood pressure
- 178 • BPM: Beats per minute
- 179 • BRIEF-A: Behavioral Rating Inventory of Executive Function
- 180 • CES: Cigarette Evaluation Scale
- 181 • CO: Carbon monoxide
- 182 • COT: Cotinine
- 183 • CPD: Cigarettes per day
- 184 • CPT: Cigarette Purchase Task
- 185 • CPT: Continuous Performance Task
- 186 • DAST: Drug Abuse Screening Test
- 187 • DDT: Delay Discounting Task
- 188 • D-KEFS: Delis-Kaplan Executive Function System
- 189 • EDC: Electronic Data Capture
- 190 • EQ-5D: Euro-Qol
- 191 • FSPTCA: Family Smoking Prevention and Tobacco Control Act
- 192 • FTND: Fagerström Test for Nicotine Dependence
- 193 • GAD: Generalized Anxiety Disorder
- 194 • HR: Heart rate
- 195 • IVR: Interactive Voice Response
- 196 • MDD: Major Depressive Disorder
- 197 • MINI: Mini International Neuropsychiatric Interview
- 198 • MNWS: Minnesota Nicotine Withdrawal Scale
- 199 • NMR: Nicotine metabolite ratio
- 200 • NNAL: 4-(methylnitrosamino)-1-(3-pyridyl)-1-butanol
- 201 • NNC: Normal nicotine content
- 202 • NNN: *N*-nitrosonornicotine
- 203 • OASIS: Overall Anxiety Severity and Impairment Scale
- 204 • OUD: Opioid Use Disorder
- 205 • PANAS: Positive and Negative Affect Schedule
- 206 • PHQ: Patient Health Questionnaire
- 207 • PSS: Perceived Stress Scale
- 208 • QSU: Questionnaire of Smoking Urges
- 209 • RNC: Reduced nicotine content
- 210 • TLFB: Timeline Follow Back
- 211 • VLNC: Very low nicotine content
- 212 • WISDM: Wisconsin Index of Smoking Dependence Motives

213

214

215  
216 **PROTOCOL**  
217

218 **1. OBJECTIVE**  
219

220 While the prevalence of smoking in the US general population has declined over the past 50  
221 years, there has been little to no decline among people with mental health conditions. Affective  
222 disorders (ADs) are the most common mental health conditions in the US, and over 40% of  
223 people with ADs are current smokers.<sup>1</sup> A national policy of reducing the nicotine content of  
224 cigarettes has the potential to reduce tobacco use, dependence, and related adverse health  
225 outcomes.<sup>2-4</sup> Controlled trials in psychiatrically stable smokers have shown that extended use of  
226 very low nicotine content cigarettes (VLNCCs) results in reductions in cigarettes per day (CPD),  
227 cigarette dependence, and tobacco toxicant exposure, with few adverse consequences.<sup>5-8</sup>  
228 Furthermore, our research during UVM TCORS Phase 1 funding indicates that smokers with  
229 ADs respond to reductions in cigarette nicotine content with reductions in cigarette demand.<sup>9-10</sup>  
230 However, tobacco market conditions are likely to exert considerable influence over the extent to  
231 which that potential is realized. In particular, we hypothesize that the following conditions are  
232 likely to exert considerable influence over the potential effectiveness of a national nicotine  
233 reduction policy for cigarettes, particularly in smokers with ADs and other vulnerabilities to  
234 tobacco addiction: (1) whether alternative sources of non-combusted nicotine are readily  
235 available, and (2) whether these alternatives are available under conditions that optimize their  
236 appeal.

237 The goal of the proposed trial is to experimentally model whether increasing the availability  
238 and appeal of an alternative, non-combusted source of nicotine (e-cigarettes) enhances the  
239 effects of reduced-nicotine cigarettes in smokers with ADs. Daily smokers with current ADs,  
240 recruited at University of Vermont and Brown University, will be randomized to one of the  
241 following four conditions: (1) normal nicotine content cigarettes (NNCCs) alone, serving as the  
242 control condition, (2) VLNCCs alone, (3) VLNCCs + nicotine e-cigarettes in only tobacco flavors  
243 (TF e-cigs), or (4) VLNCCs + nicotine e-cigarettes in preferred flavors (PF e-cigs). Participants  
244 will be asked to use only their assigned study products for 16 weeks. Outcome measures  
245 include total CPD, cigarette demand assessed by behavioral economics-based purchase tasks,  
246 craving, withdrawal, psychiatric symptoms, breath carbon monoxide (CO) and biomarkers of  
247 tobacco toxicant exposure. In Week 17, participants will receive incentives to abstain from  
248 cigarettes during a three-hour laboratory test session and we will assess the effects of study  
249 conditions on cigarette demand, craving and withdrawal.

250 This research will address the following specific aims: Aim 1 (Primary): Compare the effects  
251 of (1) NNCCs alone, (2) VLNCCs alone, (3) VLNCCs + TF e-cigs and (4) VLNCCs + PF e-cigs  
252 on total CPD in smokers with ADs. We hypothesize that at Week 16, total CPD will be reduced  
253 in a linear, graded manner (condition 4 > 3 > 2 > 1), with the largest reduction in the VLNCC +  
254 PF e-cig condition. Aim 2 (Secondary): Compare the effects of the four study conditions on  
255 cigarette demand, psychiatric symptoms, and biomarkers of smoke and tobacco toxicant  
256 exposure (CO, NNAL, PAHs) in smokers with ADs. We hypothesize that at Week 16, cigarette  
257 demand, CO, and toxicant biomarkers will have decreased in a linear, graded manner, with the  
258 largest reduction in the VLNCC + PF e-cig condition. We will characterize effects on psychiatric  
259 symptoms but are not testing specific hypotheses on these symptoms. Aim 3 (Exploratory): To  
260 explore the effects of the four study conditions on cigarette demand, craving, and withdrawal in  
261 smokers with ADs during the abstinence assessment period.

262 The integrative theme of this TCORS is vulnerable populations. The proposed research is  
263 highly relevant to the CTP's scientific domains of Addiction and Behavior because it will address  
264 whether reducing the nicotine content of cigarettes reduces cigarette use, dependence, and  
265 product appeal, and whether these effects are enhanced by the availability of an appealing  
266 alternative source of non-combusted nicotine. It will address the Health Effects domain by  
267 assessing the effects of these conditions on tobacco toxicant exposure and a respiratory  
268 biomarker. The proposed study is significant and innovative because it will model how

269 availability and appeal of e-cigs may moderate the effectiveness of a national reduced- nicotine  
270 policy for cigarettes in this understudied population. Finally, it is programmatic as it will build  
271 upon and extend the work that our team accomplished on VLNCCs in those with ADs during  
272 phase 1 of UVM TCORS funding.

## 273 274 **2. SIGNIFICANCE**

### 275 276 **2.1. Affective Disorders (AD) and Smoking**

277 Each year, cigarette smoking kills almost half a million Americans and costs the US almost  
278 \$300 billion in medical costs and lost productivity.<sup>11</sup> While smoking rates in the general US  
279 population have declined over the past 50 years, there has been little to no decline among people  
280 with mental health conditions (MHCs), indicating that current tobacco control policies and  
281 treatments are not benefiting these smokers.<sup>1,12</sup> Affective disorders (ADs), which include major  
282 depressive disorder and anxiety disorders, are the most common MHCs in the US; in 2015, 7%  
283 of US adults reported past-year major depressive disorder and 18% reported a past-year anxiety  
284 disorder.<sup>13</sup> Over 40% of people with ADs are current smokers.<sup>1</sup> Stated conversely, 22% of  
285 nicotine-dependent smokers report having a mood disorder and 23% report an anxiety disorder.<sup>14</sup>  
286 Smokers with ADs make as many cessation attempts as those without MHCs, but are more likely  
287 to relapse when they try to quit.<sup>15-18</sup> Hence, ADs are associated with disproportionately high rates  
288 of tobacco-related disease and death.<sup>19, 20</sup>

289 Similar transdiagnostic factors appear to underlie the low cessation rates in people with  
290 depression and anxiety disorders.<sup>21</sup> Negative mood is a prominent feature of major depression  
291 and anxiety disorders<sup>22</sup>. Although long-term cessation is associated with improvements in mood,<sup>23</sup>  
292 smoking abstinence produces transient increases in negative mood that are reversed by  
293 smoking.<sup>24</sup> Smokers with ADs report more severe effects of abstinence on negative mood than  
294 those without MHCs,<sup>25</sup> and have stronger expectancies that smoking will reduce negative mood.<sup>26-</sup>  
295 <sup>28</sup> Anhedonia (reduced capacity to experience pleasure from rewarding stimuli) may also  
296 contribute to smoking persistence in people with ADs. Anhedonia is a key symptom of depression  
297 and anxiety disorders and is associated with increased responsiveness to pharmacological  
298 reinforcers that potently release mesolimbic dopamine (DA).<sup>29</sup> Consistent with this hypothesis,  
299 smokers with a history of major depression have greater smoking-induced DA release than those  
300 without depression,<sup>30</sup> and overvalue cigarette reinforcement.<sup>31,32</sup> Furthermore, nicotine can  
301 enhance the reinforcing effects of environmental stimuli.<sup>33,34</sup> This may contribute to low cessation  
302 rates in smokers with ADs, as smokers with depression, but not those without MHCs, report  
303 greater enjoyment of activities in their natural environments while smoking.<sup>31</sup>

304 A national nicotine reduction policy for cigarettes may be an effective regulatory approach to  
305 reducing cigarette dependence in smokers with ADs. The 2009 Family Smoking Prevention and  
306 Tobacco Control Act gave the Food and Drug Administration (FDA) the authority to regulate  
307 tobacco products as appropriate to protect public health, including limiting the nicotine content of  
308 cigarettes.<sup>35</sup> An FDA-mandated reduction in the nicotine content of cigarettes to a minimally-  
309 addictive level could reduce tobacco reinforcement and dependence.<sup>3,36</sup> This approach could be  
310 particularly beneficial to subpopulations of smokers who have less success with currently-  
311 available cessation treatments, such as people with ADs. Our work during the UVM TCORS  
312 phase 1 funding period, indicates that smokers with ADs, like smokers without MHCs, respond to  
313 reductions in the nicotine content of cigarettes with reductions in cigarette demand and other  
314 measures of addiction potential. However, tobacco market conditions are likely to exert  
315 considerable influence over the extent to which the effects of reduced-nicotine cigarettes are  
316 realized in the natural environment. This may be particularly true of smokers with ADs, who are  
317 more sensitive to the effects of nicotine withdrawal than those without MHCs.<sup>37</sup> Use of electronic  
318 cigarettes (e-cigs) is increasing sharply in the US, and it is important to consider the potential  
319 moderating effects of e-cig use on a reduced-nicotine policy for cigarettes. By providing an  
320 alternative source of nicotine, we believe that the availability of nicotine e-cigs, and  
321 manipulations that increase their appeal (flavors), will enhance the ability of a national cigarette  
322 nicotine-reduction policy to decrease cigarette smoking, dependence and toxin exposure among



323 smokers with ADs.

324  
325 **2.2. Relevance of the project to the integrative theme and goals of the TCORS**

326 The integrative theme of the UVM TCORS is vulnerable populations, and its goals are to  
327 model the potential effects of tobacco product standards on product use in vulnerable populations,  
328 with the goal of reducing the risks of product use, dependence, and product-related adverse  
329 health outcomes. For the FDA to effectively execute its tobacco regulatory responsibilities, it must  
330 have sound scientific evidence on how product standards impact tobacco use in populations with  
331 high rates of tobacco dependence. This project will provide the FDA with evidence on the effects  
332 of a reduced-nicotine standard for cigarettes, alone and combined with another FDA-regulated  
333 product (e-cigs), on measures of cigarette use, demand, dependence, tobacco toxicant exposure  
334 and psychiatric symptoms in this vulnerable population.

335  
336 **2.3. Relevance to the scientific domains and priorities of the FDA CTP**

337 The proposed research is highly relevant to the CTP's scientific domains of Addiction and  
338 Behavior because it will address whether reducing the nicotine content of cigarettes reduces  
339 cigarette use, dependence, and product appeal, and whether these effects are enhanced by the  
340 availability of appealing alternative sources of non-combusted nicotine. It will address the **Health**  
341 **Effects** domain by assessing the effects of these conditions on tobacco toxicant exposure and a  
342 respiratory biomarker.

343  
344 **2.4. How study outcomes will improve scientific knowledge related to the manufacture,**  
345 **distribution and marketing of tobacco products**

346 Study outcomes will directly inform scientific knowledge concerning the manufacture of  
347 tobacco products by demonstrating whether a reduction in the maximum nicotine content of  
348 cigarettes sold in the US to  $\leq 0.4$  mg nicotine/g tobacco would reduce smoking in this vulnerable  
349 population. The outcomes will also indicate whether continuing to allow the sale of e-cigs in  
350 characterizing flavors improves the efficacy of a reduced-nicotine standard for cigarettes on  
351 smoking reduction in this population.

352  
353 **3. RATIONALE**

354  
355 **3.1. Effects of Nicotine Reduction in Smokers with AD**

356 Controlled trials of research cigarettes differing in nicotine content in general population  
357 samples have demonstrated that those who are switched to VLNCCs reduce their daily cigarette  
358 use, nicotine exposure, cigarette dependence, and tobacco toxicant exposure, with few adverse  
359 consequences.<sup>5-8</sup> Given the low smoking cessation rates in smokers with ADs, it is important to  
360 consider whether these smokers experience benefits or negative consequences of nicotine  
361 reduction. Prior to the work accomplished by this TCORS during Phase 1 funding, few studies  
362 had examined effects of VLNCCs in smokers with ADs. Several laboratory studies in smokers  
363 with elevated depression or anxiety symptoms found that both VLNCCs and normal-nicotine  
364 cigarettes reduce craving and withdrawal and do not exacerbate depression or anxiety (reviewed  
365 by Gaalema et al.<sup>38</sup>). We recently conducted a secondary analysis of a large randomized clinical  
366 trial that examined the effects of  
367 cigarettes varying in nicotine content  
368 over a 6-week period in non-treatment-  
369 seeking smokers, in which we  
370 examined whether those with higher vs.  
371 lower depressive symptoms at baseline  
372 differed with regard to their responses  
373 to cigarettes varying in nicotine  
374 content.<sup>39</sup> We found that after 6 weeks  
375 of use, those who had used VLNCCs  
376 had lower smoking rates, nicotine  
377 dependence and craving than those

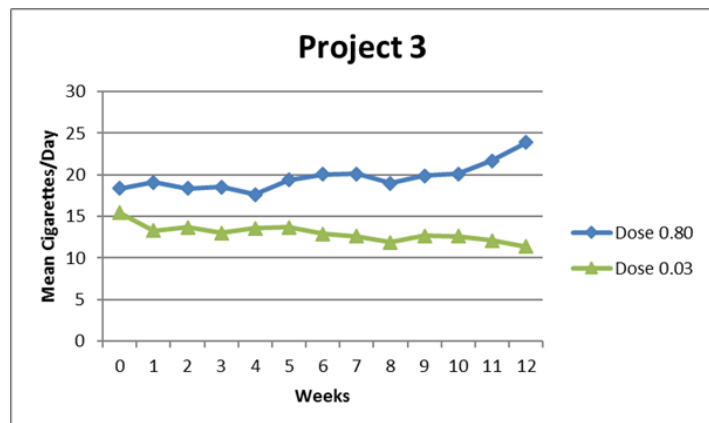

378 who had used NNCCs, regardless of baseline depressive symptom score. Furthermore, those  
 379 with elevated depressive symptoms at baseline who had been assigned to VLNCCs had lower  
 380 depressive symptoms at Week 6 than those who had used NNC cigarettes. Importantly,  
 381 biochemically-confirmed VLNCC compliance also did not differ by group. These findings provide  
 382 support for the idea that a reduced-nicotine standard for cigarettes may reduce smoking, without  
 383 worsening depressive symptoms, in smokers with elevated depressive symptoms. However,  
 384 that study examined VLNCC effects in a non-clinical sample with elevated depressive  
 385 symptoms, not those with diagnosed depression or anxiety disorders.

386 To our knowledge, we are the first to report the effects of reduced-nicotine cigarettes on  
 387 measures of cigarette reinforcement in smokers with ADs. In Study 1, we examined the acute  
 388 subjective and behavioral effects of cigarettes varying in nicotine content (15.8, 5.2, 2.4 and 0.4  
 389 mg nicotine/g tobacco) in smokers with ADs.<sup>9,10</sup> In concurrent choice testing with the cigarettes

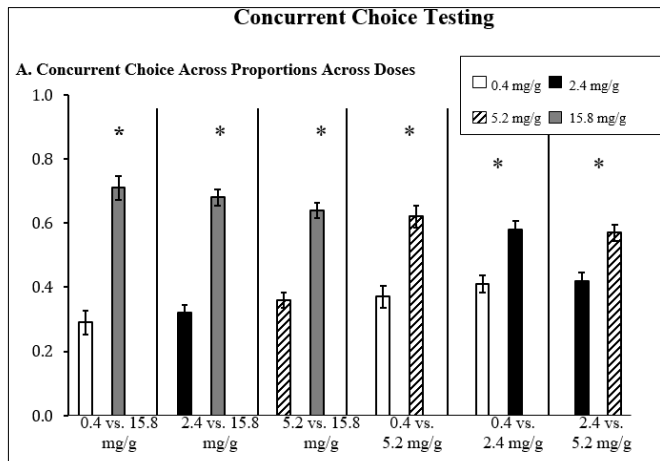

available at an equal response effort, participants chose the higher over the lower nicotine content cigarettes across each of the six dose pairs consistent with reduced nicotine content cigarettes having lower addiction potential (below, left). The only difference between populations was at the 0.4 versus 2.4 mg/g dose pair, where smokers with affective disorders chose the higher dose more often ( $p < .001$ ), while disadvantaged women ( $p = .06$ ) and those with opioid dependence ( $p = .91$ ) did not exhibit a significant preference

404 between those two doses (below, right). All doses decreased craving and withdrawal symptoms  
 405 with no evidence of compensatory smoking. While the higher nicotine cigarettes were rated as  
 406 more satisfying, increasing the response requirement to obtain these cigarettes reversed that  
 407 preference. This observation has considerable tobacco regulatory implications. For example, allowing  
 408 VLNCCs to be sold in common retail outlets while restricting sale of higher content cigarettes to more regulated  
 409 stores would be predicted to shift preference towards the former. This same concept may also extend to  
 410 regulatory efforts to shift preference from harmful combusted to less harmful non-combusted tobacco  
 411 products. Overall, our results indicate that reducing the nicotine content of cigarettes reduces the  
 412 relative reinforcing effects of smoking, and hence addiction potential, in smokers with ADs and  
 413 other vulnerabilities to tobacco addiction. The 0.4 mg/g most robustly differed from the 15.8  
 414 mg/g dose in this population, supporting prior hypotheses about reducing nicotine content below  
 415 0.7 mg/g<sup>3</sup>.

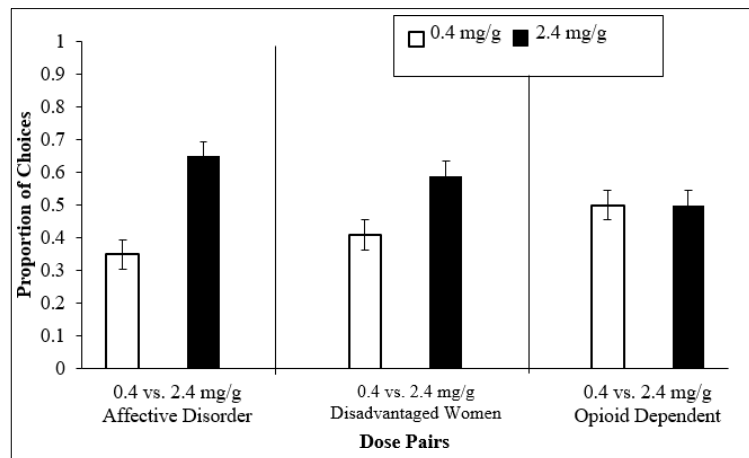

426 In Study 2, we are examining effects of cigarettes varying in nicotine content in smokers with  
 427 ADs over a 12-week period. Preliminary results from 35 participants indicate that VLNCCs reduce  
 428 smoking rates by >40% relative to NNCCs in Weeks 9-12 (see figure at right). However, while  
 429 smokers with ADs reduce their smoking rates, few quit completely, similar to results seen in  
 430 general population samples.<sup>7</sup> These findings set the stage for examining whether providing an  
 431 alternative, non-combusted source of nicotine (e-cigs) enhances the efficacy of reduced-nicotine

432 cigarettes in this population.

### 434 3.2. E-Cig Use

435 E-cigs consist of a cartridge containing an e-liquid solution of nicotine, propylene glycol (PG),  
436 vegetable glycerin (VG), flavoring, and other additives, which is heated with an atomizer that  
437 vaporizes the solution. First generation e-cigs resemble cigarettes (“cigalikes”) and are disposable  
438 or rechargeable, second generation products (such as the product that will be used in this study)  
439 often resemble pens and have refillable e-liquid reservoirs, and third generation devices have  
440 larger batteries, adjustable power delivery and replacement heating coils and wicks.<sup>40</sup> Nicotine  
441 levels from e-cigs can be comparable to those from cigarettes, depending on e-cig characteristics,  
442 e-liquid nicotine content and user topography.<sup>41-44</sup> Potential risks of e-cig use include exposure to  
443 low levels of carcinogens, toxicants, metals in the vapor, and cytotoxic effects of flavors.<sup>45,46</sup>  
444 However, toxin and carcinogen levels from e-cigs appear to be far lower than those from  
445 cigarettes. Hecht et al.<sup>47</sup> reported that former smokers who had switched to e-cigs had 59-99%  
446 lower levels of 6 tobacco toxicant and carcinogen metabolites than ongoing smokers, comparable  
447 to reductions seen in smokers who had switched to nicotine lozenges.<sup>8</sup> Another study found that  
448 NNAL, a metabolite of the tobacco carcinogen NNK, was reduced by 64% in smokers who had  
449 switched to e-cigs for two weeks, as was chest tightness.<sup>48</sup>

450 E-cig use has increased sharply in the US, particularly among people with MHCs. A 2012  
451 national probability survey in >10,000 US adults found that people with MHCs (including ADs)  
452 were twice as likely to have ever used or to currently use e-cigs than those without MHCs.<sup>49</sup>  
453 Survey data from 2015 indicate a doubling of use since the Cummins et al. survey, and people  
454 with MHCs were still twice as likely to use e-cigs as those without MHCs (24.4% ever use, 11.4%  
455 current use).<sup>50</sup> Of those with depression and anxiety disorders, 24-30% reported ever use and 11-  
456 13% reported current use.<sup>50</sup> Two surveys also reported that likelihood of e-cig use was associated  
457 with psychiatric symptom severity or number of MHCs endorsed, suggesting a systematic  
458 relationship.<sup>50,51</sup> Smokers in general report that their reasons for e-cig use are to quit or reduce  
459 smoking, to reduce cigarette craving and nicotine withdrawal, because e-cigs bother other people  
460 less than cigarettes, and because they can use e-cigs in places where smoking is forbidden.<sup>51-55</sup>  
461 Smokers with MHCs report similar reasons for use.<sup>56-59</sup>

### 463 3.3. E-cig effects on smoking

464 To date, clinical trials indicate effects of e-cigs on smoking reduction, but little effect on  
465 quitting.<sup>60-62</sup> Modest effects on cigarette abstinence in these trials may have been due to use of  
466 first generation e-cigs that provided variable nicotine delivery and were subject to battery failure.<sup>63</sup>  
467 A trial using second generation e-cigs found cigarette abstinence rates of 34% after 8 weeks and  
468 21% 6 months later, with an overall 60% reduction in CPD.<sup>64</sup> Few studies have examined the  
469 effects of e-cigs in smokers with ADs. Among hospitalized smokers with serious mental illness  
470 enrolled in a cessation trial, e-cig use increased during the trial but was not associated with  
471 smoking abstinence.<sup>65</sup> Likewise, a survey in veterans found a strong association between MHCs  
472 and e-cig use, but no association with quitting.<sup>56</sup> A secondary analysis of the Bullen et al. ASCEND  
473 trial<sup>60</sup> found that mental health status did not moderate the effect of e-cigs on quitting.<sup>66</sup> A pilot  
474 study in 21 smokers with psychotic disorders found that e-cig use decreased CPD.<sup>59</sup> Both of the  
475 latter studies reported high rates of e-cig acceptability among smokers with MHCs.<sup>59,66</sup>

476 We recently completed a pilot study in 18 smokers who were asked to switch to a second-  
477 generation e-cig with 18 mg/ml nicotine e-liquid for 6 weeks.<sup>67</sup> All of those enrolled completed the  
478 study. Participants significantly reduced their CPD, breath CO levels, Fagerström Test for  
479 Cigarette Dependence scores, and increased their readiness to quit, all with large effect sizes  
480 (Cohen’s *d*’s ranging from 0.88 to 1.3). At a follow-up visit 4 weeks later, changes from baseline  
481 had been maintained with large effects sizes on all measures (Cohen’s *d*’s ranging from 0.8 –  
482 1.1). This work demonstrates our experience and success with testing an e-cig similar to that  
483 which will be used in this study over a multi-week period.

### 485 3.4. Mechanisms of e-cig effects

486 E-cigs reduce cigarette craving and nicotine withdrawal symptoms.<sup>68</sup> Although early studies

487 found that e-cigs were less effective than cigarettes at reducing cigarette craving and  
488 withdrawal,<sup>60,69,70</sup> second-generation e-cigs more effectively reduce craving and withdrawal under  
489 natural *ad lib* use conditions.<sup>41,64,71</sup> E-cig effects on craving and withdrawal symptoms are  
490 determined by the extent to which e-cig are used by smokers; in turn, determinants of e-cig use  
491 include product appeal and reinforcing effects.<sup>72,73</sup>  
492

### 493 **3.5. Importance of e-cig flavors**

494 More than two-thirds of adult e-cig users in 2013-2014 used a flavored e-cig.<sup>74,75</sup> Flavors have  
495 been shown to substantially enhance the appeal and relative reinforcing effects of e-cigs<sup>76,77</sup> and  
496 have been cited as a key feature of e-cigs affecting use among adults.<sup>75,78,79</sup> Experimental studies  
497 show that flavors increase demand for e-cigs among cigarette smokers,<sup>80,81</sup> particularly smokers  
498 who are not current e-cig users.<sup>81</sup> Studies of e-cig users also highlight that flavors play an  
499 important role in their experience of the product<sup>82-84</sup> and in reducing cigarette consumption and  
500 craving.<sup>83,85</sup> Although a recent review on e-cigs and mental illness reported one study of flavors,  
501 which found no differential appeal in young adult smokers with mental illness in the VA,<sup>57</sup> flavored  
502 (menthol) cigarette use is preferentially used among individuals with severe psychological  
503 distress<sup>86</sup> and is associated with greater prevalence of both depression and anxiety in US young  
504 adults.<sup>87</sup> Therefore, it warrants investigation whether providing e-cigs in preferred flavors  
505 increases e-cig use and the ability of e-cigs to substitute for cigarettes in smokers with ADs.  
506

### 507 **3.6 Products to be tested**

#### 508 Cigarettes to be assessed

509 The cigarettes to be used in this study were made under an NIH contract with production being  
510 overseen by the Research Triangle Institute (referred to as “Spectrum cigarettes”). NIH currently  
511 has approximately 10 million of these cigarettes (of varying types) for research purposes. The  
512 cigarettes selected for the study span the range of yields likely to produce the hypothesized  
513 effects, as described above. Spectrum cigarettes are not currently commercially available,  
514 although they are similar in many ways to marketed cigarettes (e.g., similar manufacturing, filter,  
515 paper, etc.).  
516

#### 517 E-cigarettes to be assessed

518 Both the JUUL and the Vuse Solo will be used and assessed in this study. While JUUL will be  
519 offered to all participants, participants that are unwilling to use JUUL will be offered the Vuse  
520 Solo.

521 JUUL is a commercially available closed system containing two components. One component  
522 contains a lithium-ion battery (200 mAh), nichrome coil heater, silica wick, and stainless steel  
523 vapor path. The other component is the prefilled e-liquid container that also serves as the  
524 mouthpiece. Each commercially available cartridge holds approximately 0.7 mL of e-liquid  
525 containing approximately 40 mg of nicotine or 5% nicotine by weight (NBW). A lower dose  
526 containing approximately 23 mg of nicotine per cartridge or 3% NBW is also marketed but will  
527 not be used in this study. All containers contain glycerol, propylene glycol, natural oils, extracts  
528 and flavors, nicotine, benzoic acid. We will not alter the e-liquid in any way. The research staff  
529 will distribute the e-liquid containers as purchased from the manufacturer. The JUUL apparatus  
530 and 5% NBW e-liquids that will be used are legally purchasable and have been as of August 8,  
531 2016. We will not alter them in any way.

532 Vuse Solo is a commercially available closed system containing two components. The  
533 power/heating device includes a 270 mAh battery, silica wick, microchips, and sensor. The other  
534 component is the prefilled e-liquid container. Each commercially available cartridge holds  
535 approximately 1 mL of liquid containing 48 mg of nicotine or 4.8% NBW. All containers contain  
536 vegetable glycerin, propylene glycol, reverse-osmosis water, glycerin, flavorings, and nicotine.  
537 The research staff will distribute the e-liquid containers as purchased from the manufacturer.  
538 The Vuse apparatus and e-liquid cartridges that will be used are legally purchasable and have  
539 been as of August 8, 2016. We will not alter them in any way.  
540

### 541 **3.7. Summary**

542 Although smoking rates have declined in the overall US population, there has been little to no  
543 decline among people with ADs. A nicotine reduction strategy for combustible tobacco combined  
544 with e-cigarette availability may have complementary effects on smoking reductions and  
545 consequent tobacco-related health effects in this vulnerable population. This research is highly  
546 significant because it will model how the availability of e-cigs, a non-combusted nicotine product  
547 that is rapidly increasing in use among US smokers, impacts the effectiveness of a reduced-  
548 nicotine policy for cigarettes in this vulnerable population. It is responsive to the goals of the FDA  
549 in that the study conditions are designed to model real-world scenarios of possible harm reduction  
550 policies in a population that is vulnerable to smoking persistence.  
551

#### 552 **4. Project Study Methods**

553 This study will use a four-condition, parallel-groups research design. After a baseline period  
554 in which daily smoking rate and other baseline assessments are completed, participants will be  
555 randomly assigned to one of the following four conditions for a 16-week experimental period: (1)  
556 normal nicotine content cigarettes (NNCCs, 15.8 mg/g) alone, which serves as the control  
557 condition; (2) very low nicotine content cigarettes (VLNCCs, 0.4 mg/g) alone; (3) VLNCCs +  
558 tobacco-flavored nicotinized e-cigs (TF e-cig, 4.8 - 5.0% nicotine by weight, NBW, if they choose  
559 to use the Vuse or JULL device, respectively); or (4) VLNCCs + preferred-flavor nicotinized e-  
560 cigarette (PF e-cig).  
561

#### 562 **5. Study Screening Procedures**

##### 563 **5.1. Participants**

564 Participants will be men and women, ages 21 – 70 years, with a current diagnosis of an  
565 affective disorder, defined as a major depressive disorder, dysthymic disorder, generalized  
566 anxiety disorder, post-traumatic stress disorder, obsessive-compulsive disorder, or panic disorder  
567 with or without agoraphobia based on the Mini Neuropsychiatric Interview (MINI) which uses  
568 DSM-5 criteria, OR Lifetime diagnosis of one of the above based on MINI with a self-report of  
569 currently receiving treatment for one of these disorders prescribed psychoactive medication,  
570 behavioral therapy, etc.). Additionally, they must be sufficiently literate to complete the research  
571 tasks, be in good physical health without serious illness or change in health in past three months,  
572 and have the technological capabilities to complete weekly face-to-face video assessments and  
573 the compatibility to use ico Smartphone Smokerlyzers for assessing breath carbon monoxide  
574 (CO) levels. Study inclusion and exclusion criteria are detailed below.  
575  
576  
577

##### 578 **5.2. Recruitment**

579 Using an intent-to-treat analysis approach, we require 53 randomized per condition (212 total)  
580 to test our primary aims. We estimate 10% attrition between enrollment and randomization based  
581 on UVM TCORS Phase 1 research, and will therefore enroll up to 59 per condition (236 total). In  
582 addition, we will pilot test with up to 20 participants (10/site) for a total of 256 participants (90 at  
583 Brown, 166 at UVM). Potential participants will respond to community advertisements (local  
584 newspapers, community bulletin boards, lab Facebook page, Facebook ads, lab website, center  
585 website, behavioral health centers, Craigslist, city buses, etc.) that contain a study description,  
586 link to an online survey and the name and phone number of the Research Assistant. Participants  
587 can choose to complete the pre-screening questionnaire online or by phone. At UVM, individuals  
588 recruited from online sources will be directed to a UVM-hosted recruitment website where they  
589 will have the opportunity to select which research studies interest them. They will then be  
590 redirected to a brief online screener to assess eligibility. The Patient Health Questionnaire-4<sup>88</sup>  
591 will be used to screen for probable mood or anxiety disorder. This 4-item instrument, which  
592 comprises the first 2 items of the Patient Health Questionnaire 9-item (PHQ-9) scale<sup>89</sup> and the first  
593 2 items of the Generalized Anxiety Disorder 7-item (GAD-7) scale<sup>90</sup> measures the two core DSM-  
594 IV criteria for major depressive disorder and generalized anxiety disorder, respectively. The  
595 PHQ-4 begins with the stem question: "Over the last 2 weeks, how often have you been bothered

596 by the following problems?” and each item is scored from 0 (“not at all”), 1 (“several days”), 2  
597 (“more than half the days”), or 3 (“nearly every day”). Therefore, the total score on this composite  
598 measure ranges from 0 to 12. A total score of 3 for the 2 anxiety items or the 2 depression items,  
599 plus questions querying past treatment for depression or anxiety, will be used to identify probable  
600 cases. If deemed eligible, those who complete the online questionnaire will be called by the  
601 Research Assistant to further discuss the study. The RA will read a script briefly explaining the  
602 study. Participants will be informed that this is not a smoking cessation program, and that smoking  
603 cessation services are available in the community independent of their decision to participate in  
604 this study. If interested, they will be invited to participate in the first portion of the screening  
605 interview. Research assistants will inform eligible participants that the screening will occur over  
606 video chat, and will assist the participant with setting up an appropriately secure video  
607 platform. Those who call into the laboratory will be read a script briefly explaining the study. After  
608 verbal informed consent is received, the participants will be asked questions over the phone to  
609 determine initial eligibility.

610 During this first portion of the screening, the participant will complete questionnaires through  
611 REDCap online while the research assistant is present over video chat or phone to deliver  
612 instructions and to answer any questions. The participant will then answer interviewer-  
613 administered questionnaires over video chat. Participants who did not yet set up their video  
614 platforms will do so with the research assistant before beginning any questionnaires. Participants  
615 will be instructed to have picture identification (e.g. driver’s license) available to show the staff. If  
616 participants anticipate not having acceptable ID, staff should consult with the project coordinator  
617 or study PI. Initial study eligibility will be determined after data are collected from this visit.  
618 Participants who meet initial study eligibility will be scheduled for the second portion of the  
619 screening.

620 Before the second portion of the screening occurs, eligible participants will receive the  
621 equipment necessary to use for collecting physiological measurements. Participants will be  
622 asked to pick up this equipment via curbside pickup at our clinic (UVM University Health Center,  
623 UHC), which will consist of participants calling staff once they arrive at UHC and staff coming out  
624 to give participants a bag/box containing the following equipment: a Smokerlyzer; an audio jack  
625 adapter for the Smokerlyzer if necessary; a blood pressure cuff; an oximeter; a thermometer; a  
626 urinary cotinine dipstick; urine cups with attached temperature test strips; a pregnancy test strip  
627 (if applicable) and urine toxicology test strips or a saliva toxicology test. Participants (and staff)  
628 will be asked to use cloth face coverings when exchanging product. If participants arrive via car,  
629 staff will drop this bag on the hood of the participant’s car while the participant remains in the car  
630 Participants may be invited to come inside to pick up this equipment if the participant is asked to  
631 wait for this exchange. All participants must pass a COVID19 screening before entering the  
632 building. If there is any waiting that needs to occur inside the building, the participant will wait  
633 inside one of our five highly ventilated smoking chambers. If there happens to be no space in  
634 the smoking chambers, the participant will be told that they cannot come up to the clinic until  
635 space is available. After each use, the all of the surfaces in the smoking chambers will be cleaned  
636 with 70% or greater of alcohol solution by staff wearing a mask and gloves, as well as all of the  
637 door handles. If the participant uses the bathroom while they are in the clinic, the bathroom  
638 surfaces and handles will be wiped down after use by staff while masks and gloves are worn.  
639 Participants who are using the smoking chambers at any point in the study to wait for product or  
640 equipment exchange will remain in the chambers until a staff member comes to knock on the  
641 door to let them out. In this way, we can avoid people coming into close contact with each other  
642 in the larger room that contains the smoking chambers. A minimum of 6 feet of distance will be  
643 maintained for all staff and participants at all times. For participants who come to the clinic, a  
644 commercial courier will deliver this equipment to them before the second portion of the screening.

645 If at any point the Smokerlyzers are not available for distribution, we will conduct the CO test  
646 curbside before or after participants are invited inside and the courier service will not be  
647 available. Research Assistants will bring down the CO monitor when they bring the rest of the  
648 equipment to the participant. While maintaining 10 feet of distance and wearing gloves, staff will  
649 explain how the CO monitor works. Once the participant is ready, staff will press the button to

650 obtain the measurement and will set the CO monitor down and will back away 10 feet. The  
651 participant will then come to pick up the device and will blow into the monitor. After the participant  
652 completes the test, they will set down the monitor and back up 10 feet and staff will retrieve the  
653 monitor. After every use, staff will wipe down the CO monitor with disinfectant wipes and  
654 hydrogen peroxide wipes. When using the monitor, a D-piece (a portable valve filter) must be  
655 placed into the monitor and then the single use plastic mouthpiece is placed into the D-piece.  
656 The monitor has built in SteriTouch technology to ensure optimum infection control, and the D-  
657 pieces filter out 99.9% of airborne bacteria and greater than 97% of viruses for excellent infection  
658 control. Each participant will be assigned their own D-piece to use throughout the study, and no  
659 D-piece will ever be shared among participants. Participants will gently exhale into the D-piece for  
660 the breath carbon monoxide reading. Participants will be instructed only to exhale through the  
661 device, not to inhale. D-piece technology also includes a one-way valve that prevents air from  
662 being drawn back from the monitor. D-pieces will also be wiped down after each use with  
663 disinfectant wipes and hydrogen peroxide wipes and stored in a container at the lab.

664 Once participants have received the necessary equipment to complete the physiological  
665 portion of the screening, the research assistant will initiate a video call with the participant. During  
666 this call, the participant will be instructed on how to use the equipment and then will be asked to  
667 use the equipment to obtain the following physiological readings: blood pressure, heart rate,  
668 oxygen saturation, temperature, and breath CO levels. Participants will also be asked to collect a  
669 urine or saliva sample during the visit. If a saliva sample is collected, the participant you will  
670 provide the saliva sample over video chat while the staff observes. If a urine sample is collected,  
671 staff will ask participant to bring this urine sample to the video screen after collection to perform a  
672 urine toxicology test and a pregnancy test (if applicable). These urine cups will have temperature  
673 strips affixed to ensure that the sample is valid. Participants who have a carbon monoxide level  
674 of less than or equal to 8 will also be asked to use the urinary cotinine dipstick to determine  
675 whether they are positive for cotinine. The participant will obtain the physiological readings and  
676 perform the tests and then will hold the results of the test up to the camera so that the research  
677 assistant can interpret and record the readings on REDCap. Potential participants will also be  
678 instructed to have handy a pack of their usual brand cigarettes, all prescription medications they  
679 are currently taking and identification (example, driver's license) during this second portion of  
680 screening visit. If participants anticipate not having acceptable ID site staff should consult with  
681 the project coordinator or study PI.

682 A participant must complete his/her two-part screening session within 30 days of completing  
683 the pre-screening questionnaire. If the participant is not able to complete the two-part screening  
684 visit in that timeframe, he/she will need to complete the pre-screening questionnaire again.

### 686 **5.3. Informed Consent Process:**

687 Before beginning the informed consent process, potential participants will need to produce  
688 identification as described above. The interviewer will confirm the age and identity of the  
689 participant. If the participant is not between the ages of 21 and 70, he/she will be dismissed  
690 without payment. During the first portion of the screening session, study information will be  
691 presented and documentation of the participant's informed consent via electronic signature on  
692 REDCap will be required prior to participating in the screening session. In order to ensure  
693 adequate informed consent, participants will be asked to read the first several lines aloud (to  
694 determine literacy) and will then be given ample time to read the consent document. If the  
695 interviewer suspects the participant is not literate, he or she will have them continue reading  
696 further to confirm. Inability to read and comprehend written study materials will result in ineligibility  
697 and the interviewer will inform the participant that they are not eligible. Only after the participant  
698 and the researcher are fully satisfied that the participant understands the purpose of the study,  
699 the confidentiality of the data, the procedures, the risks/benefits and his/her rights as a research  
700 participant will the consent form be signed and the participant undergo screening procedures.

### 702 **5.4. Screening Measures**

703 **Those who consent will be screened for eligibility using the following measures:**

704 **The following physiological measures will be collected and entered directly into REDCap**  
705 **by the interviewer:**

- 706
- 707 1) Expired breath carbon monoxide (CO) levels will be assessed using an ico Smokerlyzer  
708 Smartphone Monitor (Covita -for remote collection) or a Bedfont CO monitor (for curbside  
709 collection), a reliable and valid measure of recent smoking.
    - 710 a. Urinary cotinine test strips will be used to asses cotinine levels if a participant's  
711 carbon monoxide reading is less than or equal to 8 ppm.
  - 712 2) A urine or saliva toxicological screen will be performed to assess the presence of illicit  
713 drugs including up to the following drugs: marijuana, cocaine, opiates, oxycodone,  
714 benzodiazepines, barbiturates, amphetamines, methadone, buprenorphine,  
715 methamphetamines, MDMA and PCP. Participants who fail the drug screen for drugs  
716 other than marijuana or their prescribed opioid medication may reschedule the interview  
717 but will need to be re-consented to ensure they have received adequate informed consent.  
718 They will be excluded if they are positive for drugs (other than marijuana or prescribed  
719 medications as determined by PI on a case-by-case basis) the second time.
  - 720 3) Urine Pregnancy Test (HCG detection) will be performed for all participants.
  - 721 4) Blood pressure and heart rate will be measured using an automated blood pressure  
722 monitor and a finger pulse oximeter to help the licensed medical professional determine  
723 final participant eligibility. Participants will be told if their blood pressure is in an abnormal  
724 range and advised to see a doctor by research staff. The research staff will also submit a  
725 medical event form for the LMP to review along with a Blood Pressure and Heart Rate  
726 Symptom Checklist form to ascertain details of the symptomatology for the LMP to review.  
727 In severe cases, the LMP may also choose to call the participant to follow-up and/or  
728 withdraw the participant from the study if necessary. All of these procedures are  
729 documented in our Blood Pressure/Heart Rate Collection: Standard Operating Procedure  
730 form which we can submit to the IRB if the Committee deems necessary.
  - 731 5) Body temperature, respiratory rate and oxygen saturation will be added as physiological  
732 measures based on the CDC recommendations and those of Dr. David Kaminsky.  
733 [https://www.cdc.gov/tobacco/basic\\_information/e-cigarettes/severe-lung-](https://www.cdc.gov/tobacco/basic_information/e-cigarettes/severe-lung-disease/healthcare-providers/index.html)  
734 [disease/healthcare-providers/index.html](https://www.cdc.gov/tobacco/basic_information/e-cigarettes/severe-lung-disease/healthcare-providers/index.html)  
735

736 **The following screening assessment will be administered on paper as an interview:**

- 737 1) The Mini International Neuropsychiatric Interview (MINI) 7.0<sup>70</sup>  
738

739 The following screening assessments will be administered as an interview and then will be  
740 entered directly into REDCap by the interviewer:

- 741 1) The MINI Plus Modules
- 742 2) The MINI suicide subscale<sup>94</sup> to evaluate suicide risk.
- 743 3) MINI Follow-up Questionnaire (if applicable)
- 744 4) Tobacco Use History and Exposure Questionnaire, which measures variables such as  
745 smoking amount, cigarette brand, age of initiation of smoking, number of quit attempts,  
746 duration of quit attempts and duration of smoking.
- 747 5) Smoking Cessation Therapy Use Questionnaire
- 748 6) Time Since Last Cigarette Questionnaire
- 749 7) Medical History Questionnaire to assess current diagnoses, symptoms and past health  
750 problems.
  - 751 a. Medications will be recorded directly onto the Concomitant Medications form in  
752 REDCap.
- 753 8) Drug Abuse Screening Test (DAST-10), which assesses quantity and frequency of  
754 alcohol and drug use (12 month and 1 month version)

755 **The following screening assessments will be completed by the participant directly in**  
756 **REDCap, except where noted otherwise:**  
757



- 1) Demographic History Questionnaire, which will assess age, gender, ethnicity, race, education, income, marital status, and employment history.
- 2) Alcohol Use Questionnaire---based on the Alcohol Use Disorders Identification Test<sup>95</sup> (12 month and 1 month version)
- 3) Drug Use Questionnaire---based on the Drug Abuse Screening Test<sup>96</sup> (12 month and 1 month version)
- 4) Fagerström Test for Nicotine Dependence (FTND)<sup>97</sup>;
- 5) Wisconsin Inventory of Smoking Dependence Motives-Brief Scale (WISDM)<sup>97</sup> will be administered to assess nicotine dependence severity.
- 6) Penn State Electronic Cigarette Dependence Index<sup>99</sup>; -
- 7) Smoking Stages of Change Algorithm<sup>100</sup>;
- 8) Identifying Information Form will include the participant's REDCap Subject Identifier, name, address (including the county of residence), email address, phone number, age, date of birth, and social security number (if applicable).
  - a. This form will be entered into the 'Identifying Information Access Database'.
    - Each site will have a separate 'Identifying Information Access Database'.
    - Identifying information will not be shared with other sites. Each site is responsible for maintaining confidentiality of this information.
    - Identifying information will be kept in a locked file cabinet (source document) and in a password protected Access Database (electronic version) separate from all other study data.
- 9) Beck Depression Inventory (BDI-II)<sup>91</sup>, to assess depressive symptoms.  
(This form has been updated on 1.29.20 so as to use the BDI-II. The BDI-II will be used instead of the BDI so that the data collected will be directly comparable to other projects using the BDI-II).
- 10) Overall Anxiety Severity and Impairment Scale<sup>92</sup>(OASIS); to assess frequency and severity of anxiety symptoms.
- 11) COVID19 Symptom Questionnaire
- 12) Respiratory Symptom Questionnaire will be administered to assess respiratory health

In the event that the REDCap website is not functioning, the assessments will be administered aloud and participant answers will be recorded securely. The interviewer will enter the data into REDCap when it resumes functioning properly. This information should be recorded in the 'End of Visit Evaluation Form'.

### 5.5. Suicidality/Mental Health Monitoring

Participants who endorse suicidal intention in the past month or a suicide attempt in the past 6 months as indicated on the BDI (score > 1 on question 9) or MINI suicide subscale (endorse question 4 and/or 5 on the MINI suicide subscale or question 6 on the MINI suicide subscale with suicide attempt in the past 6 months) or answer "yes" to question A3g on the MINI Neuropsychiatric interview and symptoms have occurred in the past two weeks will be assessed by a clinician for eligibility and possible intervention. The research staff member will contact a licensed clinician for evaluation. In the event that no clinician is available, staff will put the participant in contact with the National Suicide Prevention Lifeline at 1-800-273- 8255. They will also contact the Study Coordinator and Site PI to inform them of the situation as soon as possible. Additionally, they will contact the Project Coordinator to inform her of the situation. The participant will be paid \$25 (+\$25 bonus if applicable) and provided with local mental health resources. Post enrollment, any report of suicidal ideation or attempt by a participant will be grounds for immediate withdrawal from the study.

### 5.6 Inclusion/Exclusion Criteria

#### Inclusion Criteria:

- 1) Men and women ages 21-70,
- 2) Past-year: MDD, dysthymic disorder, generalized anxiety disorder, post-traumatic stress disorder, obsessive-compulsive disorder, or panic disorder with or without agoraphobia,

- 813 based on MINI structured interview, OR Lifetime diagnosis of one of the above based on  
814 MINI with a self-report of currently receiving treatment (prescribed psychoactive  
815 medication, behavioral therapy, etc.),
- 816 3) Report smoking  $\geq 5$  cigarettes per day for the past year,
  - 817 4) Provide an intake breath CO sample  $>8$  ppm, (if  $\leq 8$  ppm, then urinary-cotinine strip must  
818 be positive)
  - 819 5) Be without current substance abuse/dependence other than nicotine,
  - 820 6) Be sufficiently literate to complete the research-related tasks,
  - 821 7) Be in good physical health without serious illness or change in health in the past three  
822 months as determined by the licensed medical professional at each site,
  - 823 8) Have appropriate equipment to complete face-to-face video assessments and use ico  
824 Smartphone Smokerlyzer Monitors. For those who do not have a Smartphone, staff will  
825 explore potential alternate plans (e.g., project-provided inexpensive Android phone)

826  
827 Exclusion Criteria:

- 829 1) Exclusive use of roll-your-own cigarettes,
- 830 2) Planning to quit smoking in the next 30 days,
- 831 3) A quit attempt in the past 30 days resulting in greater than 3 days of abstinence,
- 832 4) Significant use of other tobacco or nicotine products within the past month (more than 9  
833 days in the past 30).
- 834 5) Positive toxicology screen for any of the following drugs: cocaine, opiates, methadone,  
835 oxycodone, buprenorphine, benzodiazepines, barbiturates, amphetamines,  
836 methamphetamines, MDMA and PCP
  - 837 a. Marijuana will be tested for but will not be an exclusionary criterion. Participants  
838 will be discouraged from smoking marijuana during the study.
  - 839 b. Participants with valid prescriptions for opiates, benzodiazepines, barbiturates, or  
840 amphetamines will not necessarily be excluded.
  - 841 c. Participants failing the toxicology screen will be allowed to re-screen once. These  
842 participants will need to be re-consented before being rescreened to ensure they  
843 have received adequate informed consent.
- 844 6) Self-report of binge drinking alcohol (more than 9 days in the past 30 days, 4/5 drinks in a  
845 2 hour period in females/males),
- 846 7) Systolic blood pressure  $< 90$  or  $\geq 160$  mmHg
  - 847 a. Participants failing for blood pressure will be allowed to re-screen once.
- 848 8) Diastolic blood pressure  $< 50$  or  $\geq 100$  mmHg
  - 849 a. Participants failing for blood pressure will be allowed to re-screen once.
- 850 9) Breath CO  $> 80$  ppm,
- 851 10) Heart rate is greater than or equal to 115 bpm or less than 45 bpm
  - 852 a. Participants failing for heart rate will be allowed to re-screen once.
- 853 11) Currently seeking treatment for smoking cessation,
- 854 12) Being pregnant, trying to become pregnant, or nursing, or not report using a form of  
855 approved birth control if applicable determined by the Project Medical Director
- 856 13) Have used nicotine replacement, bupropion or other pharmacotherapies as cessation aids  
857 in the past month (bupropion will be allowed for treatment of depression),
- 858 14) Unstable psychiatric conditions (psychiatric medication changes in the past 4 weeks),
- 859 15) Symptoms of psychosis, dementia or mania,
- 860 16) Suicidal ideation in the past month (score  $> 1$  on the BDI question 9 or endorse question  
861 4 and/or 5 on the MINI suicide subscale),
- 862 17) Reporting a plan or attempt to commit suicide, which is assessed on question A3g of the  
863 MINI Neuropsychiatric Interview Major Depressive Episode Module. Thoughts of suicide  
864 without an intent or plan is not an exclusion criteria,
- 865 18) Suicide attempt in the past 6 months (endorse question 6 on the MINI suicide subscale  
866 with suicide attempt in the past 6 months),

- 867 19) Participation in another research study in the past 30 days,
- 868 20) Co- habitation with any research participant who has or is participating in the current
- 869 study,
- 870 21) Daily use of e-cigarettes in the past month (defined as 6 – 7 days per week).\_\_
- 871 22) Oxygen saturation of < 90%
- 872 23) Reporting positive symptoms for COVID19
- 873

874 Individuals under age 21 are excluded because they cannot legally buy cigarettes. Those with  
875 unstable medical, psychiatric, or medication conditions (as determined by the licensed medical  
876 professional) are excluded as these symptoms could affect a participant's ability to complete the  
877 study. Examples include but are not limited to the following: angina, stroke, heart attack which  
878 occurred since phone screening, blood clots in the arms or legs for which the individual is  
879 undergoing active medical treatment, cancer requiring active chemotherapy or radiation therapy,  
880 severe shortness of breath caused by conditions such as uncontrolled asthma, COPD, or  
881 arrhythmia, active untreated infection such as pneumonia, active untreated endocrine disorder  
882 such as hyperthyroidism. We will exclude those currently seeking smoking treatment and those  
883 who plan to quit in the next 30 days, as participation in this study may not lead to reductions in  
884 smoking. We will exclude pregnant or nursing women and women of reproductive potential who  
885 are unwilling to use acceptable forms of birth control throughout the study if applicable determined  
886 by the Project Medical Director. We will also exclude anyone with current or recent alcohol or drug  
887 abuse problems as these factors could independently affect smoking behavior during the study.  
888 Individuals with baseline CO readings greater than 80 ppm, those with heart rate or blood  
889 pressure readings that are out of range (systolic: 90-159 mmHg; diastolic: 50-99 mmHg; HR: 45-  
890 114 bpm) and anyone who has attempted suicide in the past six months will be excluded from the  
891 study for safety concerns. Individuals who smoke 'roll your own' cigarettes exclusively will be  
892 excluded from the study because we will be unable to standardize their baseline smoking  
893 behavior. Individuals who have reported daily use of e-cigarettes in the past 30 days will be  
894 excluded as they may not be compliant with experimenter-provided e-cigarettes. Individuals who  
895 have recently participated in a research study will be excluded as participation may have changed  
896 their smoking patterns, which may preclude a stable smoking baseline. Because participants are  
897 required to complete portions of the protocol independently, they will need to be able to  
898 independently read and comprehend the study materials.

### 900 **5.7. Eligibility Determination:**

901 The research assistant will review the entire screening assessment battery for initial eligibility  
902 determination, confirming the participant meets the above described inclusion/exclusion criteria.  
903 All eligibility criteria that are not related to physiological measurements will be assessed during  
904 the first portion of the screening visit, and all criteria related to physiological measurements will  
905 be determined during the second portion of the screening. The final eligibility of the participant  
906 will be determined by a licensed medical professional (MD,DO, NP, PA, Master's prepared RN  
907 or CRN) at each site after reviewing the Medical History Questionnaire, BDI, Mini Neuropsychiatric  
908 Interview, and the MINI suicide subscale. The licensed medical professional may meet with a  
909 participant if available and think it necessary for eligibility determination. He/she will sign off on  
910 eligibility prior to the first baseline visit. If the licensed medical professional determines the  
911 participant is not medically eligible to participate in the study, has current symptomatology that  
912 would interfere with interpretation of the data, or is unlikely to complete the study he/she will inform  
913 the research assistants who will contact the participant prior to the first baseline visit. The licensed  
914 medical professional will not need to review the medical history forms of participants who are  
915 ineligible for other, non-medical reasons.

916 If a participant fails the urine or saliva toxicology screen due to a prescription medication  
917 he/she is taking, then he/she will not be automatically excluded. The interviewer will make note of  
918 this when he/she submits the forms to the licensed medical professional for final eligibility  
919 determination.

920 Once all the screening procedures have been completed, researchers will pay participants  
921 \$25 (+\$25 bonus if applicable) for their time as long as they pass the drug tests and meet the

922 minimum requirements for carbon monoxide or urinary cotinine levels. Participants will be paid  
923 after the completion of the study visit. If participants are deemed ineligible at any point in the  
924 screening, the participant will be paid after determined ineligible. Marijuana will be tested for but  
925 will not be an exclusionary criterion. If a participant does not pass the drug test but has a current,  
926 valid prescription that would explain the failed test he/she will not be automatically excluded and  
927 will still receive the visit payment. Participants who meet all other eligibility criteria, sans the  
928 medical criteria, will be scheduled for the first baseline visit.

929 At the end of the screening session, the researcher will complete the End of Visit Evaluation  
930 Form. This will allow the researcher to make note of any problems encountered during the visit  
931 and to assess the truthfulness of the participant in regards to self-report of tobacco use.  
932

## 933 **6. Study Baseline Procedures**

934  
935 This study will use a one-week, two-session baseline period to collect baseline individual  
936 difference measures and monitor daily usual-brand smoking behavior. At Baseline 1 or within 1  
937 business day of the Baseline 1 visit, participants will be provided their usual brand cigarettes to  
938 smoke, equivalent to 150% of their daily smoking rate. Participants will be encouraged to come to  
939 the lab to pick up their usual brand cigarettes in a curbside exchange after they complete the  
940 questionnaires and physio for the BL1 visit. Those who cannot come to the lab will receive product  
941 via a commercial courier. A time line follow back (TLFB) will be used during the period between  
942 Baseline 1 and Baseline 2 to assess the daily cigarette use for the first 7 days the participant has  
943 product. The participant must have received their UB cigarettes from the lab before the 7-day  
944 assessment period starts, and Baseline 2 must occur at least 7 days after the participant receives  
945 their usual brand cigarettes from the lab. If the baseline period extends past seven days and if the  
946 participant has run out of product, participants will need to purchase their own usual brand cigarettes.  
947 Use of a two session baseline period will ensure stability of daily smoking reports, reduce reactivity  
948 to the daily cigarette monitoring, and reduce participant burden. During the two baseline sessions,  
949 participants will complete subjective questionnaires. Each visit will last approximately two to four  
950 hours. At the end of each baseline session, the researcher will complete the End of Visit Evaluation  
951 Form,. This will allow the researcher to make note of any problems encountered during the visit and  
952 to assess the truthfulness of the participant in regards to self-report of tobacco use. Participants will  
953 also be supplied with saliva test equipment and urine collection equipment during the Baseline 1  
954 product exchange so that they can collect saliva and first void urine samples during the Baseline  
955 2 visit.

956 For the Baseline 1 visit and all subsequent visits, the participant will be sent a REDCap link  
957 within 15 minutes of the start of the scheduled visit to complete all of the non-interviewer  
958 administered questionnaires. The participant will complete these questionnaires on their own but  
959 can have the research assistant present on a video call if they desire. Before beginning the  
960 physiological assessment portion of the visit over video call, the research assistant must review  
961 the participant's questionnaire responses for that visit. Participants will be compensated after the  
962 completion of the study visit and when the participant has received their new product.

963 At Baseline 2 and all subsequent visits, after the participant has answered the questionnaires  
964 and has completed the physiological portion of the visit over video call, participants will be asked  
965 to come to the lab for exchange of product and biological samples. Participants will bring in their  
966 used and unused product from the previous visit as well as a first-void urine sample for assessing  
967 tobacco- related toxin exposure and a salivary sample for assessing nicotine metabolism rate on  
968 applicable visits (BL2, Week 8 and Week 16) using equipment that was provided at the previous  
969 visit. Participants will be instructed to call the RA at the office when they get to the clinic to ensure  
970 that there is enough space in the smoking chambers to house all participants while abiding by  
971 safety guidelines as detailed on page 14 of the protocol. All participants must pass a COVID19  
972 screening before entering the building. When invited into the lab, the participant will be shown to a  
973 smoking chamber and will instructed to place their bag of product outside of the chamber. The  
974 participant will wait here while the RA processes and returns product through the randomization  
975 database. Then the RA will dispense new product and bring the bag back to the participant. When

976 the RA deems it safe for the participant to exit the chamber, the RA will instruct the participant  
977 that they can leave. The RA will instruct the participant to observe social distancing measures  
978 during this exchange, providing clarification if necessary. If a participant forgets their first-void  
979 urine sample at the Baseline 2 visit, staff will ask participant to come back to the clinic with their  
980 first void urine sample before exchange of product occurs. If participant is unable to return to the  
981 clinic with their first void sample, staff can arrange to meet the participant off campus to pick up  
982 their urine sample and to give participant their study product. Distancing and safety measures as  
983 described above must be observed. For participants who cannot make it to UHC, special  
984 arrangements will be made to enable use of the randomization database and product  
985 return/distribution procedures to the extent possible. Each week, during - or scheduled as nearly  
986 as possible to – a virtual visit, a complete accounting of the participant's product inventory will be  
987 taken and processed remotely through the randomization database. The participant will separate  
988 product based on its type (e-cigarette or combustible inventory) and status (used/unused), and  
989 the RA will process return characteristics through the database accordingly. The RA will clarify  
990 barcode characteristics with the participant when legibility is compromised. The participant will be  
991 instructed to keep unused product in their possession, but to exchange any used product with the  
992 courier who will deliver newly dispensed replacement products within 48 hours.

993 Product that will be given to participants for the Baseline 2 visit cannot be given/sent to  
994 participants until 7 days have passed following completion of the Baseline 1 visit. We will need to  
995 calculate baseline smoking rate during this 7-day period and so participants cannot have access  
996 to any blinded study product or e-cigarettes before this 7-day period has ended.

#### 998 **6.1. Visit scheduling requirements for baseline period:**

999 Participants will be required to schedule the Baseline 1 visit within 30 days of the completion  
1000 of their screening visit. If a participant still wants to be in the study after 30 days, he/she will need  
1001 to be re-screened. The participant will need to be re-consented but will maintain the original  
1002 REDCap Subject Identifier. The ideal target window separating Baseline 1 and Baseline 2 is  
1003 between 7 and 12 days. The minimum is 7 days and the maximum is 21 days. If the participant  
1004 does not complete the visit within 21 days, then he/she will not be rescheduled and will be  
1005 discontinued from the study.

#### 1007 **6.2. Measures/Assessments**

1009 **The following physiological measures will be collected and recorded directly into REDCap  
1010 by the interviewer:**

- 1011 1) CO
- 1012 2) Blood Pressure
- 1013 3) Heart Rate
- 1014 4) Body temperature
- 1015 5) Oxygen saturation
- 1016 6) Respiratory rate
- 1017 7) Urine or Saliva Toxicology
- 1018 8) Urine Pregnancy test (if applicable, to be performed every 2 weeks)

1020 **The following assessments will be administered as an interview at Baseline 1 and entered  
1021 directly into REDCap by the interviewer at the end of the visit:**

- 1022 1) Concomitant Medications Form
- 1023 2) Health Changes Questionnaire, which will assess any weekly health changes,
- 1024 3) Time Since Last Cigarette Questionnaire

1026 **The following assessments will be administered at Baseline 1 and completed by the  
1027 participant directly in REDCap:**

- 1028 1) BDI

- 2) OASIS
- 3) Respiratory Symptom Questionnaire
- 4) COVID19 Symptom Questionnaire
- 5) Wisconsin Inventory of Smoking Dependence Motives-Brief Scale (WISDM) will be administered to assess nicotine dependence severity.
- 6) Perceived Health Risks Rating<sup>101</sup>, a measure of the perceived addictive potential and other health risks associated with cigarettes;
- 7) Perceived Stress Scale (PSS)<sup>101</sup>, assessing the degree to which life situations are perceived as stressful;
- 8) Positive and Negative Affect Scales (PANAS)<sup>102</sup>, a measure of changes in positive and negative mood;
- 9) Respiratory Health Questionnaire, a UVM measure of cough, shortness of breath and other respiratory symptoms;
- 10) Minnesota Nicotine Withdrawal Scale (MNWS)<sup>103</sup>, a measure of nicotine withdrawal;
- 11) Questionnaire of Smoking Urges-brief scale - Usual Cigarette (QSU)<sup>104</sup>, which measures the urge to smoke;
- 12) Vaping Craving Questionnaire<sup>105</sup>, which measures the urge to vape;
- 13) Cigarette Evaluation Scale – Usual Cigarette (CES)<sup>106</sup>, which measures responses to cigarettes (e.g., reward, satisfaction);
- 14) Vaping Evaluation Scale (VES), which measures responses to taping (e.g. reward, satisfaction)
- 15) Cigarette Purchase Task – Usual Brand Version (CPT)<sup>107</sup>, a self-report analogue of a progressive-ratio schedule that measures the relative reinforcing efficacy of cigarettes by querying how many of that day’s cigarette they would consume in a day at varying prices. This task will indicate whether prolonged VLNC cigarette use reduces cigarette demand and increases sensitivity to increases in cigarette costs;
- 16) Snaith-Hamilton Pleasure Scale (SHAPS)<sup>110</sup>.

All participants will also be asked to select their top three flavors of e-cigarette liquid from a list read to them by the RA. This question will be asked in preparation for giving flavored pods to participants who are randomized into the flavored e-cigarette condition. This information will be recorded directly into REDCap. Participants will be asked to rate these top three flavors based on either previous experience with these flavors or to indicate how much they believe that they will like or dislike the flavors.

**Physiological measures collected at Baseline 2 will be entered directly into REDCap by the interviewer:**

- 1) CO
- 2) Blood Pressure
- 3) Heart Rate
- 4) Body temperature
- 5) Oxygen saturation
- 6) Respiratory rate
- 7) Urine or Saliva Toxicology
- 8) Urine Pregnancy (if applicable; to be performed every two weeks)
- 9)

**The following assessments will be administered as an interview at Baseline 2 and then entered directly into REDCap by the interviewer:**

- 1) Concomitant Medications Form
- 2) Health Changes Questionnaire
- 3) Time Since Last Cigarette Questionnaire

1082  
1083 **The following assessments will be administered at Baseline 2 and completed by the**  
1084 **participant directly in REDCap:**

- 1085 1) BDI
- 1086 2) OASIS
- 1087 3) COVID19 Symptom Questionnaire
- 1088 4) Respiratory Symptom Questionnaire
- 1089 5) MNWS
- 1090 6) WISDM
- 1091 7) PANAS
- 1092 8) QSU (usual brand)
- 1093 9) Vaping Craving Questionnaire
- 1094 10) CES (usual brand)
- 1095 11) Vaping Evaluation Scale
- 1096 12) CPT (usual brand)
- 1097 13) Snaith-Hamilton Pleasure Scale (SHAPS)
- 1098 14) E-Cigarette flavor rating questionnaire
  - 1099 a. Participants will rate only the flavors that they received from staff for this visit

1100  
1101 In the event that the REDCap website is not functioning, the assessments will be administered  
1102 aloud and participant answers will be recorded securely. The interviewer will enter the data into  
1103 REDCap when it resumes functioning properly. This information should be recorded in the 'End of  
1104 Visit Evaluation Form'.

- 1105 1) for each picture as they appear on the screen.

### 1106 1107 **6.3 E-cigarette Training Session (Baseline 2):**

1108 Participants assigned to an e-cig condition will be told that they will be provided with a JUUL. If a  
1109 participant indicates an unwillingness to use the JUUL device, the research assistants will offer  
1110 the participant the Vuse Solo as alternative device. If the participants does not wish to use either  
1111 device, he or she would be ineligible for the study.

1112 Participants in the e-cigarette conditions will be given e-cigarette pods BEFORE the training  
1113 session occurs. These pods will be either picked up at the lab (preferred) or delivered to the  
1114 participant 1 to 2 days before their Baseline 2 visit occurs. Participants randomized to the e-  
1115 cigarette conditions will be notified before their Baseline 2 visit (but after the 7-day period  
1116 following Baseline 1) and informed of their e-cigarette condition. Participants randomized to the  
1117 flavored condition will be given pods of up to three flavors of their choice. Staff will calculate how  
1118 many total pods participants will be given at this time based on their smoking rate, and  
1119 participants will be able to choose the proportion of each flavor that they would like to receive.

1120 The e-cigarette training session will occur over video chat after the physiological  
1121 measurements have been collected. The first 30 minutes of the training session will consist of  
1122 the participant being taught how to use, charge, and replace pods/cartridges for their e-  
1123 cigarette of choice. Participants will first try their JUUL using the tobacco flavor, and then decide  
1124 which device they would like to use for the duration of the study. If desired, participants are able  
1125 to choose a preferred device to use without testing both e-cigarettes. At this point, participants  
1126 who are in the tobacco-only flavor condition will conclude their training session.

1127 For all visits following Baseline 2, participants in the preferred flavor condition are permitted  
1128 to take up to three flavors home per week, but can choose to take less than three flavors if  
1129 desired. Participants will take home their chosen pods or cartridges of up to three flavors until  
1130 next visit. Participants will be able to change their flavors at only one point in the study if they  
1131 desire. Participants will only be allowed to take home three flavors at one time. Participants will  
1132 be given an E-cigarette instructional manual that reviews the e-cigarette training done at this  
1133 visit. Participants will be encouraged to call with any device issues.

### 1134 1135 **6.4. Interactive Voice Response System:**

At the end of the first baseline visit, participants will be trained to use the Interactive Voice Response (IVR) System, which will contact participants each day throughout the study and ask about their smoking behavior as well as withdrawal symptoms the week before and after Baseline 2. We will also review the IVR adherence incentive program, which consists of \$1 per call plus a \$10 bonus for seven consecutive calls.

The IVR system is operated by TeleSage (<https://telesage.com/about/>). To be enrolled in the IVR system, research staff will enter the participant's initials, telephone number, subject identifier, and visit dates into the IVR TCORS website. Identifying information (initials and telephone numbers) will not be extracted as part of the data by the bioinformatics group. Please refer to TeleSage's privacy statement and HIPAA compliance form for additional information.

### **Baseline 2 biological specimens:**

#### 1) Urine sample for smoking biomarker assessment:

Participants will be asked to provide a urine sample (first void of the day) at the second baseline session and to post-randomization weeks 8 and 16 for biomarker assessment. Biomarker analysis will provide nicotine and carcinogen exposure outcome measures and verify compliance with VLNC cigarettes. Samples will be stored at -80C. Urine samples will be analyzed for total nicotine (cotinine plus its glucuronide conjugate, a useful measure of daily nicotine exposure), the tobacco-specific nitrosamine 4-methylnitrosamine-1-(3-pyridyl)-1-butanol (NNAL), and metabolites of 4 polycyclic aromatic hydrocarbons (PAHs), which are biomarkers of tobacco smoke carcinogens and decrease upon tobacco cessation or reduction. Anatabine is a minor alkaloid that is reduced in users of VLNC cigarettes and e-cigs. Therefore, anatabine levels in samples from those assigned to the VLNCC, VLNCC +TF e-cig and VLNCC+PF e-cig conditions should be lower than levels from those in the NNCC condition. These analyses will be performed by the Murphy lab at the University of Minnesota.

#### 2) Saliva Samples for smoking biomarker assessment:

We will collect a saliva sample at the second baseline session and post-randomization weeks 8 and 16 for analysis of nicotine metabolite ratio (NMR; ratio of 3-hydroxycotinine [3 HC] to cotinine [COT]), a phenotypic marker of nicotine metabolic rate. Analyses of these samples will be performed by the Tyndale lab.

### **Biomarker shipping and storage:**

Biomarkers will be shipped quarterly to the University of Vermont Laboratory for Clinical Biochemistry Research (Tracy Lab). The Tracy Lab will serve as a central repository for all biomarker specimens and will be responsible for distributing specimens to the appropriate labs on a quarterly basis. Urine samples will be analyzed and stored at the University of Minnesota Murphy Lab. The saliva samples will be analyzed and stored at the University of Toronto Tyndale Lab.

## **7. Study Experimental Procedures**

### **7.1 Experimental Period:**

Participants will be seen weekly throughout the 16-week experimental period. Weeks 4, 8, 12, 16 and the abstinence visit will take approximately 2-4 hours each. All other sessions will last approximately 2 hours. If a participant has a positive urine or saliva toxicology test or is visibly intoxicated as determined by slurred speech, swaying, or stumbling, the session will be rescheduled until a negative test result is obtained and intoxication is not present. As a part of each experimental visit, participants will be asked to come to UHC for a product exchange. All participants must pass a COVID19 screening before entering the building. Participants will be instructed to contact the RA at the office when they get to the clinic to ensure that there is enough space in the smoking chambers to house all participants while abiding by safety guidelines as detailed on page 14 of the protocol. All participants must pass a COVID19 screening before entering the building. When invited into the lab, the participant will be shown to a smoking



1190 chamber and will be instructed to place their bag of product outside of the chamber. The participant  
1191 will wait here while the RA processes and returns product through the randomization database.  
1192 Then the RA will dispense new product and bring the bag back to the participant's smoking  
1193 chamber and leave it on the ground in front of the chamber. When the RA deems it safe for the  
1194 participant to exit the chamber, the RA will instruct the participant that they can leave. The RA will  
1195 instruct the participant to observe social distancing measures during this exchange, providing  
1196 clarification if necessary. At the end of each experimental session, the researcher will complete  
1197 the End of Visit Evaluation Form, which will be filed in the participant's binder. This will allow the  
1198 researcher to make note of any problems encountered during the visit and to assess the  
1199 truthfulness of the participant in regards to self-report of tobacco use and compliance to study  
1200 procedures.

### 1201 1202 **Visit scheduling requirements for experimental period:**

1203 The ideal scheduling window between each visit is 7 days based on the date of the Baseline  
1204 2 Visit. For additional scheduling requirements, refer to the '*Scheduling Visits SOP*'. If a participant  
1205 misses a visit and is unable to reschedule during the window ( $\pm 3$  days), that visit will not be  
1206 'made-up' in the future. All measures that were not completed will be considered missing data  
1207 and will not be collected during future visits. If a visit mistakenly occurs outside of the designated  
1208 window, this is a protocol deviation. A 'Non-Medical Event Form' will need to be completed.  
1209 Additionally, each visit should occur at approximately the same time of day  $\pm 2$  hours.

1210 If a participant is not able to attend his/her Week 16 visit, then it should be rescheduled even  
1211 if it is outside of the scheduling window. This will be documented as a protocol deviation.

## 1212 1213 **7.2 Experimental Visits Weeks 1, 3, 5, 7, 9, 11, 13, and 15 Procedures**

### 1214 1215 **7.2.A. Measures/Assessments**

#### 1216 **Physiological Measures Collected and entered directly into REDCap by the interviewer:**

- 1217 1) CO
- 1218 2) Blood Pressure
- 1219 3) Heart Rate
- 1220 4) Body temperature
- 1221 5) Oxygen saturation
- 1222 6) Respiratory rate
- 1223 7) Urine or Saliva Toxicology
- 1224 8) Urine Pregnancy test (if applicable, to be performed every 2 weeks)

#### 1225 1226 **The following assessments will be administered as an interview and will be entered** 1227 **directly into REDCap by the interviewer:**

- 1228 1) Concomitant Medications
- 1229 2) Medical Event Form, if applicable
- 1230 3) Health Changes Questionnaire
- 1231 4) Time Since Last Cigarette Questionnaire

#### 1232 1233 **The following assessments will be completed by the participant directly in REDCap:**

- 1234 1) BDI
- 1235 2) OASIS
- 1236 3) COVID19 Symptom Questionnaire
- 1237 4) Respiratory Symptom Questionnaire
- 1238 5) MNWS
- 1239 6) Snaith-Hamilton Pleasure Scale (SHAPS)

1240 In the event that the REDCap website is not functioning, the assessments will be administered  
1241 aloud and participant answers will be recorded securely. The interviewer will enter the data into  
1242 REDCap when it resumes functioning properly. This information should be recorded in the 'End of  
1243 Visit Evaluation Form'.

1245 **7.3 Experimental Visits Weeks 2, 4, 6, 8, 10, 12, 14, and 16 Procedures:**

1246  
1247 **7.3.A Measures/Assessments**

1248 **Physiological measures collected and entered directly into REDCap by interviewer:**

- 1249 1) CO  
1250 2) Blood Pressure  
1251 3) Heart Rate  
1252 4) Body temperature  
1253 5) Oxygen saturation  
1254 6) Respiratory rate  
1255 7) Urine or Saliva Toxicology  
1256 8) Urine Pregnancy test (if applicable)  
1257

1258 **The following assessments will be administered as an interview and will be entered into REDCap by the interviewer at the end of the visit:**

- 1259 1) Concomitant Medications  
1261 2) Medical Event Form, if applicable  
1262 3) Health Changes Questionnaire  
1263 4) Time Since Last Cigarette Questionnaire  
1264

1265 **The following assessments will be completed by the participant directly in REDCap:**

- 1266 1) BDI  
1267 2) OASIS  
1268 3) COVID19 Symptom Questionnaire  
1269 4) Respiratory Symptom Questionnaire  
1270 5) MNWS  
1271 6) QSU (usual brand)  
1272 7) QSU (study cigarette)  
1273 8) Vaping Craving Questionnaire  
1274 9) CES (usual brand)  
1275 10) CES (study cigarette)  
1276 11) Vaping Evaluation Scale  
1277 12) PANAS  
1278 13) Cigarette Purchase Task - Usual Brand Cigarette Version (weeks 4, 8, 12 and 16 only)  
1279 14) Cigarette Purchase Task – Study Cigarette Version (weeks 4, 8, 12 and 16 only)  
1280 15) Cross-price Elasticity Task<sup>109</sup>- e-cigarettes and combustible cigarettes (weeks 4, 8, 12  
1281 and 16 only) (for e-cigarette experimental conditions only)  
1282 16) Penn State Electronic Cigarette Dependence Index (weeks 8 and 16 only)  
1283 17) Respiratory Health Questionnaire (weeks 8 and 16 only)  
1284 18) FTND (weeks 8 and 16 only)  
1285 19) Perceived Health Risks Questionnaire (weeks 8 and 16 only)  
1286 20) Smoking Stages of Change Algorithm and Contemplation Ladder (weeks 8 and 16 only)  
1287 21) WISDM – Brief Scale  
1288 22) Snaith-Hamilton Pleasure Scale (SHAPS)  
1289 23) Drug Use Questionnaire – 1 month version (weeks 8 and 16 only)  
1290 24) Perceived Stress Scale (weeks 8 and 16 only)  
1291 25) Alcohol Use Questionnaire – 1 month version (weeks 8 and 16 only)  
1292 26) E-cigarette flavor rating questionnaire (weeks 4, 8, 12 and 16 only)  
1293

1294 In the event that the REDCap website is not functioning, the assessments will be administered  
1295 aloud and participant answers will be recorded securely. The interviewer will enter the data into  
1296 REDCap when it resumes functioning properly. This information should be recorded in the 'End of  
1297 Visit Evaluation Form'.

1298 **Biological Samples to be collected:**  
1299

- 1300 1) First void urine sample (Weeks 8 and 16 only)  
1301 2) Saliva sample (Weeks 8 and 16 only)  
1302

#### 1303 **7.4 Interactive Voice Response System:**

1304 Participants will continue to use the IVR system on a daily basis throughout the  
1305 experimental period to record the number of study cigarettes smoked per day, measurement of  
1306 e-cig use and use of non-study cigarettes or other tobacco products. Measurement of e-cig use  
1307 will be collected by asking two questions: how many daily e-cigarette episodes occurred, where  
1308 one episode consists of around 10-15 puffs or up to approximately 10 minutes, and what  
1309 proportion of pods and/or cartridges were used per day. Participants will also be asked to log  
1310 how many flavors of e- cigs they used per day. During the first week after Baseline 1, the IVR  
1311 system will collect information about mood and withdrawal symptoms.  
1312

#### 1313 **7.5 Variable Incentive Program:**

1314 An incentive program has been developed with the goal of improving attendance at  
1315 scheduled assessment sessions, compliance with using only study-provided tobacco products,  
1316 and encouraging honest self-reports regarding all nicotine/tobacco use.

1317 Briefly, participants will receive a total of seven tickets for each weekly visit they attend after  
1318 randomization (Visits 03-18, weeks 1-16). In total, participants could earn 112 valid tickets  
1319 across the 16 visits. Participants will be instructed that these tickets correspond to attendance  
1320 (one ticket), honest reporting (one ticket), compliance in bringing back used and unused  
1321 pods/cartridges (two tickets) and adherence to using only the assigned study product (three  
1322 tickets). Participants who do not bring back all of their unused study product and used  
1323 packaging will be told that they may not be eligible to earn the two compliance tickets.

1324 Participants will be further instructed that all of the tickets that they receive “could” be eligible  
1325 for entry into a monthly drawing for prizes, but that only tickets that are “validated” will be eligible  
1326 for prizes.

1327 Since it is prohibitively expensive to test urine samples each week for each participant and  
1328 because it is currently not feasible to detect with reasonable precision non-compliance based on  
1329 biomarkers in the two higher nicotine group, we plan to only validate the attendance tickets.  
1330 Hence, each participant who attends their regularly scheduled weekly session will have a total of  
1331 seven validated tickets entered into the monthly drawing.

1332 To convey the message that we may be validating honest reporting and use of only study-  
1333 provided products, a bogus pipeline of sorts, we will tell the participants that a composite  
1334 assessment of the measures that we collect MAY be used to validate the amount of nicotine  
1335 and tobacco products that they are using. So there is some minor deception involved, but  
1336 technically we could conduct urine toxicology testing for both purposes. Hence, if the urine  
1337 toxicology testing is presented as something that MAY be done for validation purposes, we feel  
1338 that any deception is relatively minor. For scientific/economic reasons we are just electing to  
1339 restrict validation to attendance.

1340 Nevertheless, we will debrief all participants upon the completion of the trial. We will inform  
1341 them that the incentive program was based exclusively on attendance due to the relatively high  
1342 cost of urine toxicology testing and other practical problems with shipping the urines for prompt  
1343 testing.

1344 Drawings will be conducted on the 1st of each month. Validation will be performed by staff  
1345 who have no participant interaction and are not blind to condition. Any ticket drawn will be  
1346 eligible for an incentive as the only true contingency is for attendance. There will be no mention  
1347 of the basis for earning incentives (i.e., whether the ticket was for attendance, honesty,  
1348 adherence). Participants will simply be informed that he or she earned an incentive from the  
1349 drawing.

1350 Each drawing will be independent (without replacement); consequently, some participants will  
1351 not win a prize and others may win more than one during the study if more than one of their  
1352 tickets is drawn. After confirming winners, the remaining tickets from each month will be  
1353 discarded (i.e., tickets will only be entered into one drawing). The monthly prize amounts are

1354 detailed below.

1355 We estimate based on the 2 ½ years we think it will take to complete this study, that  
1356 participants will win an average of approximately \$65 in prizes or an additional \$5.50 per week  
1357 per participant.

1358  
1359 Grand Prize (1): \$500 cash Second Prize (1): \$200 cash Third Prize (5): \$10 cash

## 1360 1361 **7.6 Product and Procedures Compliance Review Sessions:**

1362 At each visit, Baseline 2 through Week 16, participants will be counseled about their use of  
1363 the study cigarettes and assigned e-cigarette (if applicable). Participants will be asked about any  
1364 concerns or obstacles associated with use of the study cigarettes and assigned e-cigarette (if  
1365 applicable). The importance of honest self-reporting will be stressed. Participants will be told that  
1366 they will not be penalized for use of other nicotine or tobacco products and that it is crucial for  
1367 them to report any use of these products. If difficulties are encountered, participants will be asked  
1368 why they think they are experiencing difficulties (e.g., taste, withdrawal symptoms) and to  
1369 problem-solve how to deal with these difficulties in order to meet the protocol requirements.  
1370 Additionally, participants will be counseled about their IVR completion, visit attendance, task  
1371 engagement and product accountability. Refer to the '*Product and Procedures Compliance  
1372 Review Sessions SOP*' for more information.

## 1373 1374 **7.7 Quit Attempts During the Study Protocol:**

1375 At each weekly session, we will ask each participant if s/he is currently abstaining from  
1376 smoking with the intention of quitting and whether s/he is planning to quit smoking prior to  
1377 his/her next scheduled visit. If a participant is currently abstaining from smoking with the  
1378 intention to quit, we will encourage the participant to continue abstaining, schedule them for  
1379 weekly visits, and provide them with NCI's Clearing the Air manual and local smoking cessation  
1380 resources. We will give them the option of taking study product(s) home but not require that they  
1381 take them, and if they do take the product(s) home we will suggest that they put the product(s)  
1382 away at home so as to remove these cues from view. We will ask the participant to contact staff  
1383 if they lapse and would like to receive study product(s) prior to his/her next visit. If a participant  
1384 is planning to quit but has not initiated a quit attempt, we will ask if s/he has identified a quit date  
1385 and if so what the date is, provide them with the Clearing the Air manual and local smoking  
1386 cessation resources, provide them with the study product(s), and recommend that they put the  
1387 product(s) away out of view on the quit date.

1388 For those in a condition including e-cigarettes, we will defer to the participant's interests in  
1389 continuing to use e-cigarettes as part of their quit attempt. Those who indicate that they will  
1390 continue to use them will be given their same weekly supplies base on their baseline smoking  
1391 rate. Those who indicate that they are planning to abstain from both combusted and non-  
1392 combusted tobacco, we will honor that request. As we state above about combusted cigarettes,  
1393 if participant changes his or her mind about resuming e-cigarette use, they can contact us and  
1394 obtain their weekly supply.

### 1395 1396 **7.7.A. If a participant is currently abstaining from smoking with the intention to quit:**

- 1397 • Encourage participant to continue abstaining from smoking
- 1398 • Schedule the participant for normal weekly visits, but no puff topography
- 1399 • Provide the participant with the '*Clearing the Air*' manual and local smoking cessation  
1400 resources
- 1401 • Give the participant the option to receive study product rather than require him/her to take  
1402 the product
- 1403 • If the participant choses to receive the study product have him/her sign a form  
1404 acknowledging that cigarette availability could be detrimental to the quit attempt.  
1405 Recommend that he/she put the product "away" at home as to avoid unwanted cues to  
1406 smoke.
- 1407 • If the participant chooses not to receive the study product, have him/her contact the lab if

1408 he/she lapses and would like to pick up or be mailed the study product prior to his/her next  
1409 visit.

1410  
1411 **7.7.B. If a participant is planning to quit smoking, but has not initiated the quit attempt:**

- 1412 • Ask if he/she has identified a target quit date and, if so, what that target date is
- 1413 • Provide the participant with the 'Clearing the Air' manual and local smoking cessation  
1414 resources
- 1415 • Provide the participant with the study product as usual. Recommend that on the target  
1416 date he/she put the product "away" at home as to avoid unwanted cues to smoke.  
1417

1418 **7.8 Abstinence Assessment Session:**

1419 After the week 16 visit, participants will be required to attend one additional visit the  
1420 following day. During this visit, participants will have been encouraged to abstain from smoking  
1421 until their next scheduled visit (approximately 24 hours later). The abstinence assessment  
1422 session should be scheduled no less than 18 hours and no more than 30 hours after the Week  
1423 16 visit. Abstinence will be verified by an expired breath carbon monoxide level of less than or  
1424 equal to 6 parts per million (ppm). This session will allow us to determine whether the  
1425 experimental cigarettes and e-cigarette use (for the e- cigarette conditions) have reduced the  
1426 effects of abstinence on these measures relative to the control conditions. If the participant  
1427 does NOT meet abstinence criteria, he/she will only receive \$20 for the visit. Those who do  
1428 meet abstinence criterion will do concurrent choice session detailed below.  
1429

1430 **7.8.A Participants Who Meet Criteria for Abstinence**

1431  
1432 **7.8.A.1 Measures/Assessments**

1433 **Physiological measures collected and entered directly into REDCap by the interviewer at**  
1434 **the end of the visit:**

- 1435 1) CO
- 1436 2) Blood Pressure
- 1437 3) Heart Rate
- 1438 4) Body temperature
- 1439 5) Oxygen saturation
- 1440 6) Respiratory rate
- 1441 7) Urine or Saliva Toxicology  
1442

1443 **The following assessments will be administered as an interview and will be entered**  
1444 **directly into REDCap by the interviewer:**

- 1445 1) Concomitant Medications
- 1446 2) Medical Event Form, if applicable
- 1447 3) Health Changes Questionnaire
- 1448 4) Time Since Last Cigarette Questionnaire  
1449

1450 **The following assessments will be completed by the participant directly in REDCap:**

- 1451 1) BDI
- 1452 2) OASIS
- 1453 3) COVID19 Symptom Questionnaire
- 1454 4) Respiratory Symptom Questionnaire
- 1455 5) MNWS
- 1456 6) PANAS
- 1457 7) QSU-brief - Usual Cigarette
- 1458 8) QSU-brief - Study Cigarette
- 1459 9) Vaping Craving Questionnaire
- 1460 10) Cigarette Purchase Task - Usual Brand Cigarette Version
- 1461 11) Cigarette Purchase Task - Study Cigarette Version
- 1462 12) E-cigarette Purchase Task- E-cigarette Version

1463 13) Snaith-Hamilton Pleasure Scale (SHAPS)  
1464

1465 In the event that the REDCap website is not functioning, the assessments will be administered  
1466 aloud and participant answers will be recorded securely. The interviewer will enter the data into  
1467 REDCap when it resumes functioning properly. This information should be recorded in the 'End  
1468 of Visit Evaluation Form'.

1469  
1470 **7.8.B. Participants Who Do Not Meet Criteria for Abstinence**  
1471

1472 **7.8.B.1 Measures/Assessments**

1473 **Participants who do NOT meet abstinence criteria will be required to complete the**  
1474 **following assessments:**

- 1475 1) CO  
1476 2) Blood Pressure  
1477 3) Heart Rate  
1478 4) Body temperature  
1479 5) Oxygen saturation  
1480 6) Respiratory rate  
1481 7) Urine or Saliva Toxicology  
1482

1483 **The following assessments will be administered as an interview and entered directly into**  
1484 **REDCap by the interviewer:**

- 1485 1) Concomitant Medications  
1486 2) Health Changes Questionnaire  
1487 3) Medical Event Form, if applicable  
1488 4) TLFB  
1489

1490 **The following assessments will be completed by the participant directly in REDCap:**

- 1491 1) BDI  
1492 2) OASIS  
1493 3) COVID19 Symptom Questionnaire  
1494 4) Respiratory Symptom Questionnaire  
1495

1496 **7.9 Participant Compensation:**

1497 Participants will receive \$25 plus a \$25 bonus for completing each screening visit on time as  
1498 scheduled. Payment for the first screening session will be made upon its completion. Payment  
1499 for the second screening session will be made regardless of enrollment as long as the  
1500 participant passes the drug test and meets the minimum requirements for carbon monoxide or  
1501 urinary cotinine levels. Participants who do not pass the drug test or who are visibly intoxicated  
1502 as determined by slurred speech, swaying, or stumbling will not be able to complete the visit  
1503 and will be asked to take another test several days after the first positive. If they are negative for  
1504 the second test, they will be eligible to participate, and if they are positive the for the second text  
1505 they will be excluded. Participants will receive \$100 for each study visit from Baseline 1 to Week  
1506 16. Participants will also have a chance to earn an additional \$20 bonus for every study visit that  
1507 is completed on time as scheduled starting at Week 1 and ending at Week 15.

1508 Participants can receive up to \$120.00 for the abstinence session (\$20 if participant does  
1509 not achieve abstinence, \$120 if participant reaches abstinence), \$40 for biochemical verification  
1510 of abstinence at 30 day follow up visit, and up to \$306 for completing daily IVR reports of study  
1511 cigarette and other nicotine and tobacco use. There will also be a \$150 bonus distributed at  
1512 Week 16 for completing the study. Participants who do not complete the entire study will receive  
1513 compensation for the sessions that they do complete. Total compensation for completing Study  
1514 3, including study visit payments, daily IVR calls and end of study bonus is \$2816. As  
1515 mentioned above, participants will have a chance to earn additional incentives for compliance,  
1516 honesty and attendance through urine testing. Participants will be given a debit card at the  
1517 beginning of the study (during the second portion of the screening visit) and compensation for

1518 each visit will be automatically transferred to the card after they complete that visit. If debit cards  
1519 are unavailable, participants will be paid via an alternate method (i.e. cash or check).

1520  
1521 **7.10 End of Study:**

1522 After a participant has completed all study procedures and has been paid for participation the  
1523 research assistant will read the following script and give the participant the *Clearing the Air*

1524 *Manual.*

1525 *“If you’ve reduced your smoking during this study, we encourage you to continue these reductions*  
1526 *or even consider quitting. We would like to provide you with some resources should you decide*  
1527 *to try to abstain from smoking (give “Clearing the Air” and hotline information). Please also feel*  
1528 *free to consult with your physician and use any medications he/she deems appropriate. We will*  
1529 *call you in approximately 30 days to ask about your smoking since leaving the study. There is no*  
1530 *right answer and we know how difficult quitting can be. Please just answer honestly. The call will*  
1531 *take less than 5 minutes. Thanks again for your participation.”*

1532 The following assessments will be administered using REDCap:

- 1533 1) End of Study Questionnaire  
1534

### 1535 **7.11 30 Day Follow up Phone Call:**

1536 Participants will receive a follow-up phone call between 25 and 35 days after the abstinence  
1537 assessment session to assess their smoking patterns. The phone questionnaire will last less  
1538 than five minutes. The questionnaire will ask if the participant is still smoking, how much and  
1539 whether he/she has attempted to quit smoking since the end of the study. Participants will  
1540 receive 5 variable incentive program lottery tickets for completing the call as compensation.

1541 Those who report abstinence will be invited to complete biochemical verification and be  
1542 compensated \$40 for doing so. Abstinence will be achieved by a carbon monoxide reading of 6  
1543 parts per million (ppm) or under. A urine sample may also be collected to be sent to the lab for  
1544 analysis. Additionally, any Medical Event Forms that remain open from the last session will be  
1545 discussed. If the participant became pregnant during the study, this would have been recorded  
1546 as a medical event. During this phone call, the research assistant will confirm her due date.

1547 This event will remain open until delivery. At that time the licensed medical professional will  
1548 contact the participant to ask a few questions about the baby’s health and will update the  
1549 Medical Event Form.

1550 Once a participant has completed all study procedures and all open events have been  
1551 closed, the PI or Project Manager will review the participant’s record and sign a form indicating  
1552 study completion for that participant.

## 1554 **8.0 Study Randomization**

### 1556 **8.1 Randomization Process**

1557 The lead statistician will create a randomization schedule for each of the two sites,  
1558 amounting to 150% of expected enrollment at each site. The excess randomization codes will be  
1559 used in the event that a site will have to enroll extra participants due to unexpectedly slow  
1560 enrollment at another site. The nicotine doses will be identified by letter code and only  
1561 Administrative Core personnel with no participant contact will have the link between the  
1562 statistician’s letter code and dose assignments. There will be no blinding of e-cigarette  
1563 conditions. The Administrative Core will maintain the randomization schedule and the link  
1564 between the alphabetic code and treatment assignment securely. A second sealed copy will be  
1565 secured in a separate building to protect against loss related to fire or other unforeseen events.

1566 The University of Vermont will be responsible for removing all identifying information from  
1567 cigarettes received from the Research Triangle Institute (RTI), labeling each carton with a blind  
1568 code, assigning product using this blind code based on the randomization schedule being  
1569 provided by the UVM Biostatistics Core, and shipping cigarettes and e-cigarettes to each site as  
1570 needed based on recruitment. Each site will be responsible for tracking product received and  
1571 distributed to participants, collecting unused product from participants, and returning unused  
1572 cigarettes and e-cigarettes to UVM. The participants, investigators and study staff will not have  
1573 knowledge of which product is given to a participant or whether different participants received  
1574 the same or different product.

### 1576 **8.2 Study Product Administration**

1577 During the experimental period, participants will be provided with a 14-day supply of research  
1578 cigarettes equivalent to 150% of their daily smoking rate. Those in the e-cigarette conditions will



1579 also be provided with a 14-day supply of e-cigarettes equivalent to their daily smoking rate. This  
1580 rate will be calculated at Baseline 2 and will be an average daily smoking rate based on the IVR  
1581 data that reports on the usage for the first seven days following the day of the first baseline visit.  
1582 This will ensure adequate availability of cigarettes in the numerous locations participants may  
1583 typically keep a supply (home, work, vehicle, etc.) as well as avoid expending the entire supply if  
1584 they miss a scheduled visit. Participants will be instructed to use the research cigarettes for 12  
1585 weeks, at which point they are to discontinue product use.

1586 If there is prior knowledge a participant will be missing a visit (i.e. planned vacation, laboratory  
1587 closure, etc.), then the participant will be provided with an adequate supply of cigarettes to make  
1588 up for the missed visit(s). The participant will be given a 21-day supply if one visit is going to be  
1589 missed and a 28-day supply if two visits are going to be missed.

### 1591 **8.3 Guidelines for Reporting other Nicotine Product Use**

1592 Participants will be asked to refrain from use of other non-study cigarettes during the study  
1593 period. If participants have to use another nicotine product, they will be told to use a non-  
1594 combustible product (gum, patch, etc.). Additionally, they will be told there is not a penalty for use  
1595 of non-study products, and that it is crucial for them to report any use of non-study tobacco  
1596 products. Throughout the baseline and experimental periods, an Interactive Voice Response  
1597 (IVR) system will be used on a daily basis to record the number of study cigarettes and non-study  
1598 cigarettes used the previous day. During the baseline and first experimental week, participants  
1599 will also answer daily IVR questions about their mood. Participants will be seen weekly for  
1600 assessments. Brief standardized review sessions focusing on compliance with the study  
1601 cigarettes and other study procedures will be provided at each visit.

### 1603 **8.4 Product Accountability:**

1604 Participants will be required to keep track of all the products provided to them. Therefore, they  
1605 will be instructed to return all unused products and empty cigarette packs e-liquid pods/cartridges  
1606 to the laboratory each week. Research staff will complete the 'Product Accountability Log' as they  
1607 process participants' product. Any discrepancies in the product dispensed versus product  
1608 returned will be discussed and recorded in the log. Research staff will weigh all opened e-cigarette  
1609 pods/ cartridges that the participant returns at all visits to determine how much e-liquid was used  
1610 since the participant was last seen. Empty cigarette packs and e-liquid pods/cartridges will not be  
1611 saved. Unused cigarette packs and e-liquid pods/cartridges will be re-distributed to the  
1612 participants during Weeks 1-15. During Week 16, remaining unused cigarettes and e-cigarette  
1613 pods/cartridges returned by the participants will be collected by the research staff.

1614 Participants who report running out of cigarettes or e-liquid pods/cartridges prior to a  
1615 scheduled weekly visit will be allowed to come in for an unscheduled visit to obtain more  
1616 research cigarettes. To determine whether a rate change for cigarettes is necessary, we will  
1617 look at the past two CO levels as compared to the Baseline 2 CO. If the CO trend is consistent  
1618 with the self-report of smoking all of the allotted cigarettes then a rate increase will be granted.  
1619 The participant will then receive cigarettes at a rate of 175% of their daily smoking rate. The  
1620 maximum increase is 200% of their daily smoking rate. To determine whether a rate change for  
1621 e-cigarettes is necessary, we will monitor the amount of e-cigarette use the participant is  
1622 reporting and showing through product return along with any unscheduled visits. The  
1623 investigator may grant an e-cigarette rate increase in increments of 25%. The maximum increase  
1624 for e-cigarettes will be 200% of their baseline weekly e-cigarette dispensation rate.

1625 If participants lose more than two packs of cigarettes and/or pods/cartridges and require an  
1626 unscheduled visit to the laboratory to supplement their supply, they will be told the next time  
1627 they lose more than two packs they will have to wait until their next scheduled appointment to  
1628 receive more cigarettes.

## 1630 **9. Study 3 Statistical Methods and Sample Size**

### 1631 **9.1 Statistical Methods**

Continuous outcomes will be summarized by mean, standard deviation, median and range. Categorical outcomes will be summarized by frequencies and percentages. Skewed continuous outcomes will be log- or square-root transformed as appropriate. Variables measured at each baseline visit will be averaged and the average will be used as the baseline measurement. As we expect conditions to be balanced on important baseline characteristics due to randomization, our primary analysis for all endpoints will not be adjusted for potential confounders. However, a secondary analysis will be completed for all outcomes adjusting for demographic characteristics (e.g., age), that we have found to be important in prior studies. Potential moderators (e.g., SSRI vs. non-SSRI antidepressant, depression vs. anxiety disorders, BMI above or below 30) will be explored by adding that term and the moderator-by-condition term to the model. We will examine age group and gender as potential moderators in a similar fashion.

Participants will be randomized in equal probability to one of the four conditions, with randomization stratified by site and menthol cigarette status. All analyses will follow the intent-to-treat principle (i.e. subjects will be analyzed according to condition assignment, regardless of compliance). The Primary Aim will examine the effects of condition on total CPD (study product and non-study product). CPD will be analyzed by week (mean over all days in a seven-day period) using a mixed model to account for repeated measures from the same individual.

Models will include baseline CPD as a covariate. Using a mixed model also allows us to include the effect of study site as a random effect. Additional analyses conducted using data collected at the end of the study will use orthogonal comparisons to test for a linear trend in the decrease in CPD, such that VLNCC + PF e-cig > VLNCC + TO e-cig > VLNCC > NNCC, with the largest reduction in the VLNCC + PF e-cig condition. As we expect that differences among conditions for some of the outcomes may not follow a linear pattern, we will use related planned comparisons to test for threshold effects, specifically contrasting the NNCC condition to all three VLNCC conditions, and NNCC to the two VLNCC + e-cigarette conditions.. Analysis of cigarette demand, smoke exposure and tobacco carcinogens (Aim 2) as well as additional outcomes, including subjective effects, will be analyzed in a similar manner. Because Exploratory Aim 3 is based on abstinence-induced effects and will be examined using data collected at a single visit at Week 17, analysis will be based on an analysis of co-variance model. In addition to the effect of condition, we will include important covariates noted above. Exploratory analyses will also be conducted combining data collected from three of the vulnerable populations (disadvantaged women of childbearing age, opioid dependent individuals, individuals with AD) to explore potential differences in effects of study condition across these populations. This will be done with the addition of the effects of population and population-by-condition terms to the models described above. Study staff will make every effort to minimize missing data, and results of our ongoing trial suggest that this will be minimal. We will examine the missing data pattern, and if it is missing at random, will use all data available, without imputation.

permutation tests.<sup>121</sup>

**9.2 Sample Size**

Sample size was determined using NQuery Advisor based on hypothesis tests related to Aim 1, specifically to detect a significant difference between the study conditions (NNCC, VLNCC, VLNCC + TO e-cigs, VLNCC + PF e-cigs) on total cigarettes per day (CPD). The primary statistical approach will be repeated measures ANOVAs but required sample sizes were calculated focusing on expected outcomes at Week 16. This sample size estimate is intentionally conservative and calculated based on one outcome at one time point; however, given the repeated measures nature of our data, we will have correlated observations within subjects. Thus, with the given sample sizes we will achieve the stated power to detect differences of even lesser magnitude than stated or planned. Our sample size determination is based on preliminary results from our current trial and results from a large randomized clinical trial of

**Table 2. Observed effect sizes**

| <b>Outcome</b> | <b>Observed between-group ES (15.2 vs. 0.4 mg/g)</b> |
|----------------|------------------------------------------------------|
| CPD            | 0.81                                                 |
| Craving        | 0.20                                                 |
| FTND           | 0.42                                                 |
| Breath CO      | 0.33                                                 |

1687 cigarettes varying in nicotine content.<sup>7</sup> Note that the between-group effect size is defined as the  
1688 difference of study condition means divided by the common standard deviation. A sample size of  
1689 53 participants per condition will provide 80% power to detect an effect size of 0.60 for all pair-  
1690 wise comparisons, with a two-sided type 1 error rate of 0.05. This is smaller than that found in  
1691 our on-going study to date for CPD and smaller than the effect sizes reported by Hatsukami et  
1692 al.<sup>8</sup> for all measures except breath CO. In addition, this sample size provides greater than 95%  
1693 power to detect a linear dose-response effect across the four experimental conditions. Because  
1694 we have relied only on outcomes at Week 16, our proposed sample sizes are somewhat  
1695 conservative, but we believe this is appropriate for this study given that the effects of VLNC  
1696 cigarettes in this population, particularly in combination with e-cigarettes, are completely  
1697 unknown. The sample size above assumes a 15% loss to follow-up, consistent with our  
1698 experience in the current study. We will increase our overall sample size to 232 in order to  
1699 allow pilot testing in a group of 20 participants.  
1700

## 10. Potential Risks of Participation

### 10.1 Risks of Participation

- 1704 1) Survey Questionnaires. This interview will include questions about your medical and  
1705 psychiatric histories, drug and alcohol use and history, breath tests for cigarette and  
1706 alcohol use, urine or salivary tests of illicit drug use and pregnancy, and questionnaires  
1707 about your mood. Answering these personal questions could make you uncomfortable. If  
1708 you report thoughts of killing yourself or other indicators of suicidality, a study clinician  
1709 will come to talk to you. You may also request to see a study clinician if you are in  
1710 discomfort and would like help and/or referrals for mental health resources.
- 1711 2) Breach of Confidentiality: The risk of the interview is loss of privacy if other people find out  
1712 the results.
- 1713 3) Undue Influence: Undue influence is a possible risk due to monetary compensation for  
1714 participating in these studies. The likelihood of this risk is low because the compensation  
1715 is commensurate with the amount of time and effort required for these studies.
- 1716 4) Drug Testing: A breach of confidentiality could occur and other people could learn of the  
1717 participant's drug use.
- 1718 5) Obtaining Blood Pressure and Heart Rate. The blood pressure cuff may cause minimal  
1719 discomfort. In obtaining blood pressure we may find a participant to have abnormal blood  
1720 pressure and/or heart rate. If participant's blood pressure is abnormal, we will inform the  
1721 participant of this, and participant may be advised to see a doctor, and may also be  
1722 contacted by our study doctor. Also, smoking and nicotine can affect the cardiovascular  
1723 system, which may result in changes in blood pressure and/or heart rate.
- 1724 6) Smoking Cigarettes: All cigarettes are detrimental to a person's health and can lead to  
1725 significant medical problems including:
  - 1726 a. Cardiovascular Diseases: Coronary heart disease, heart attack, stroke, peripheral  
1727 vascular disease, reduced blood circulation, abdominal aortic aneurysm
  - 1728 b. Respiratory Diseases: Emphysema, bronchitis, and chronic airway obstruction  
1729 Cancers: Cancer of the lung, bladder, cervix, esophagus, kidney, larynx, mouth,  
1730 pancreas, throat, and stomach; leukemia
  - 1731 c. Metabolic Diseases: Type 2 Diabetes
  - 1732 d. Other Health Risks Associated with Smoking: Including but not limited to infertility,  
1733 lower bone density in postmenopausal women, and hip fracture in women
  - 1734 e. Death
- 1735 7) Smoking Study Cigarettes. All cigarettes are harmful to a person's health and can lead to  
1736 cardiovascular (heart) disease, respiratory (lung) disease, cancer and other health  
1737 problems. In addition to the above medical problems, you may experience some minor  
1738 negative health effects such as headaches. You may also experience smoking  
1739 withdrawal symptoms, which are listed below. In addition, due to the altered nicotine

1740 levels, there could be a change in your use of cigarettes including the manner in which  
1741 you inhale the smoke. Smoking the study cigarette does not necessarily provide any less  
1742 risk than your usual brand of cigarette and could pose increased health risks.

- 1743 8) Using Study E-cigarettes. E-cigarettes are devices that heat nicotine to produce an  
1744 aerosol. The health effects of e-cigarettes are still unclear, but appear to be less than  
1745 that for tobacco cigarettes. Most e-cigarette users have lower nicotine levels than when  
1746 they smoked regular cigarettes. Some e-cigarette users, especially those who use both  
1747 e-cigarettes and regular tobacco cigarettes as well as youth and young adults, can have  
1748 increased nicotine levels. In some rare cases, these use patterns have been associated  
1749 with seizures. Whether this would occur with the concurrent use of very low nicotine  
1750 cigarettes is unclear. E-cigarettes users very often maintain addiction to nicotine, but this  
1751 addiction appears to be somewhat less than that from tobacco cigarettes. Abruptly  
1752 quitting e-cigarettes could cause withdrawal symptoms similar to those from quitting  
1753 tobacco cigarettes (see below) but slightly less severe. The most common side effects  
1754 include dry mouth, irritation of the throat and mouth, and mild cough. The JUUL and  
1755 Vuse e-cigarettes we will be providing have not been well-studied but appear to be of  
1756 similar risk to other e-cigarettes. You may have heard that e-cigarettes, or "vapes," can  
1757 explode and seriously injure people. Although they appear rare, these explosions are  
1758 dangerous. The exact causes of these incidents are not yet clear, but some evidence  
1759 suggests that battery-related issues may lead to vape explosions. In order to prevent e-  
1760 cigarette related injuries, keep your e-cig away from other metal objects, never charge  
1761 your e-cig with a phone or tablet charger, don't charge your e-cig overnight or leave it  
1762 charging unattended, and stop using the e-cig if the batteries get damaged or wet.  
1763 Always keep e-cig liquid out of kids' and pets' reach and sight after use. If we learn about  
1764 additional risks of e-cigarettes during the study, we will inform you of these risks.

1765 Mood and Psychiatric Symptom Changes. You may experience smoking withdrawal  
1766 symptoms during this study. These symptoms can include anger, anxiousness, craving  
1767 for a cigarette, depressed mood, difficulty concentrating, frustration, increased appetite,  
1768 impatience/impulsivity, irritability, restlessness, sleep problems, and weight gain. These  
1769 feelings can be uncomfortable and can last a couple of weeks, but usually are of minimal  
1770 risk. In addition, if you have a past history of anxiety, depression, or alcoholism, it is  
1771 possible withdrawal could cause substantial increases in depression and anxiety  
1772 symptoms, but this appears to be rare. At each visit, we will ask you how you feel. If you  
1773 or we think that being in this study is putting your mental health at risk, we may have you  
1774 meet with an on-site clinician and/or stop participating in the study. Further, if you report  
1775 thoughts of killing yourself or other indicators of suicidality, a study clinician will come to  
1776 talk to you. You may also request to see a study clinician if you are in discomfort and  
1777 would like help and/or referrals for mental health resources.

- 1778 9) Returning to Regular Smoking: It is possible that if participants return to smoking their  
1779 usual brand of cigarette at the end of the study they may experience mild and transient  
1780 nausea, dizziness, and lightheadedness.
- 1781 10) Risk to Fetus. To avoid risks to a fetus, it is important that you are not pregnant during  
1782 this study. Avoiding sexual activity is the only certain method to prevent pregnancy.  
1783 However, if you choose to be sexually active, you should be using approved forms of  
1784 birth control if applicable determined by the Project Medical Director, including but not  
1785 limited to prescribed birth control pills, patch, ring, injections, implants or intrauterine  
1786 device (IUD) or an appropriate "double barrier" method. If you choose to be sexually  
1787 active during this study, pregnancy could still result even with the use of these birth  
1788 control methods.

## 1789 **10.2 Avoiding Risks to Fetus:**

1791 If participants choose to be sexually active, they should use an appropriate "double barrier"  
1792 method of birth control (such as female use of a diaphragm, or contraceptive sponge, in addition

1793 to male use of a condom) or the female should be using prescribed “birth control” pills, patch, ring,  
1794 injections, implants or intrauterine device (IUD) if applicable determined by the Project Medical  
1795 Director. If a participant endorses a “double barrier” method, our medical professional will speak  
1796 to the participant to confirm which methods will be used during the duration of the study.  
1797 Participants will be tested for pregnancy every two weeks beginning at screening through the last  
1798 study visit. If a participant becomes pregnant during the study, she will be withdrawn from the  
1799 study. Approximately 30 days after being withdrawn or having a positive pregnancy test at the last  
1800 study visit, the research staff will call the participant to confirm her due date. The licensed  
1801 medical professional will follow-up with the participant after delivery to ask questions about the  
1802 baby’s health.  
1803

1804 **10.3 Expected benefits of participation:**

1805 There are no benefits from participating in the study. The information obtained from this  
1806 study may ultimately help the Food and Drug Administration decide how best to regulate nicotine  
1807 and tobacco products with the goal of improving public health.  
1808

1809 **11. Protection Against Risk**

1810 **11.1 Data Collection Protections**

1811 Research data without identifiers will be maintained in a locked file cabinet and on  
1812 password-protected computers in the research staff workplace, with only code numbers  
1813 identifying subjects. Study consent forms and the linkage between the participants’ names and  
1814 codes will be stored in a locked file cabinet inside a locked office. Interviews with participants will  
1815 be conducted in private rooms. Urine or saliva samples for drug and pregnancy tests and  
1816 tobacco exposure biomarkers will be obtained in a private bathroom within the laboratory suite.  
1817

1818 Subjective measures will be administered electronically. The biostatistics and data-  
1819 management team will provide consistent data-management practices for all data in the Center.  
1820 Using REDCap, which is housed on the University of Vermont Medical Center’s HIPAA-  
1821 compliant computing system, will maximize validity and reliability of data. REDCap is a secure,  
1822 web-based system that accommodates local and remote data collection by each project team,  
1823 and allows for data entry work-flow monitoring and data quality control monitoring by biometry  
1824 staff. The RedCap database for this project will be hosted on the UVMCOM servers. In addition,  
1825 data will be collected from participants on a daily basis using an interactive voice recognition  
1826 system (IVR) developed and hosted by TeleSage Inc ([www.telesage.com](http://www.telesage.com), Chapel Hill, NC).  
1827 TeleSage is a company with expertise on gathering patient-centered outcomes tracking data  
1828 for mental health clinical and research institutions. TeleSage has developed and hosted  
1829 behavioral health-related research software systems using IVR and Web-based  
1830 technologies and is leader in behavioral health outcomes tracking technologies. For data  
1831 integrity, data entry windows will follow the structure of paper forms as much as possible to allow  
1832 for ease of entry, and will use predefined choices to minimize errors when possible. Data quality  
1833 monitoring will be facilitated with periodic down loads and analysis using a variety of common  
1834 statistical program format such as SAS, Stata, R, and SPSS. Quality control procedures will be  
1835 conducted for all data collected, including analysis of missing data and logic checks for out of  
1836 range and other anomalous values. This secure electronic data gathering and transmission plan,  
1837 overseen by the experienced biostatistical team, will minimize opportunities for breaches of  
1838 confidentiality. Biological samples for nicotine and carcinogen biomarker analysis will be marked  
1839 with participant ID, stored in the locked laboratory suite, and sent to a laboratory for analysis on  
1840 a quarterly basis.

1841 All information collected as part of this study will be accessible only to research staff. No  
1842 information will be shared with participants’ clinicians unless the participant requests this in  
1843 writing. All investigators and staff have undergone (and any new staff will undergo) human  
1844 subjects’ ethics training as required by UVM and are fully conversant with relevant ethical  
1845 principals around confidentiality. Assessments, consenting and study procedures will be closely  
1846 supervised by the PI.

1847 The sponsors (NIDA/FDA) as well as the Institutional Review Board and regulatory  
1848 authorities could be granted direct access to original medical and research records for  
1849 verification of clinical trial procedures and/or data. If this is required, it will be done under  
1850 conditions that will protect privacy to the fullest extent possible consistent with laws relating to  
1851 public disclosure of information and the law-enforcement responsibilities of the agency.  
1852

### 1853 **11.2 Data Storage:**

1854 Data will be stored locally at each site. Long-term storage of all study data, for at least 7 years  
1855 after study completion, will be at the University of Vermont.  
1856

## 1857 **12. Adverse Events**

1858  
1859 The research assistant will ask about adverse events at each session, using a form that  
1860 assesses the nature, severity, duration, action taken, and outcome of study-related adverse  
1861 events. AEs will be captured from the time of first study cigarette. Participants will be given  
1862 contact cards to inform us of events that occur between study contacts. Any AE that remains  
1863 open will be reviewed and closed at an interview conducted 30 days after the study completion  
1864 date (completers) or when the study should have ended had the participant completed the study  
1865 (dropouts and those withdrawn by investigator).

1866 All procedures will be monitored to ensure that they conform to the approved protocol. In  
1867 addition, monitoring will be done of all unforeseen circumstances that might arise and affect  
1868 safety; of all reports of serious adverse events as defined in 38 CFR 46 (death, new or  
1869 prolonged hospitalization, persistent or significant disability/incapacity); of other significant  
1870 adverse events (adverse events that lead to drop out by the participant or termination by the  
1871 investigator); of unexpected adverse events resulting from the study, and of expected adverse  
1872 events.

1873 Any SAE will be brought to the attention of the site PIs as soon as possible and not longer  
1874 than 24 hours. Any AE or SAE that is both unexpected and related to study participation will be  
1875 reported to the IRB within 7 days of the event. The local IRB will make a determination as to  
1876 whether additional reporting requirements are needed. IRB actions will be reported to the  
1877 funding agency by the PIs no less than annually and more frequently as recommended by the  
1878 local IRB. Any SAEs will be summarized in the yearly Progress Reports to the funding agency,  
1879 including a review of frequency and severity. All SAEs will be followed through ongoing  
1880 consultation with the physician caring for the patient until they resolve, result in death, or  
1881 stabilize and are not expected to improve. The study staff will be in close contact with  
1882 participants and health care providers throughout the study to monitor for potential unanticipated  
1883 problems. Any unanticipated problems will be discussed at the weekly research staff meetings  
1884 and reported as required to the local IRB.  
1885

## 1886 **13. Withdrawal or Monitoring of Participants**

1887  
1888 **For the participant's protection, participants will be withdrawn immediately from the**  
1889 **study if any of the following occur:**

- 1890 1) Cardiovascular disease (CVD) event: Typically includes MI (heart attack), PTCA  
1891 (angioplasty/stenting), bypass surgery, stroke, peripheral vascular disease (arterial  
1892 blockages in arms or legs leading to procedure or surgery). Less common CVD problems  
1893 would be new cardiac arrhythmias (e.g., new atrial fibrillation) or new valvular disease  
1894 (e.g., mitral or aortic regurgitation).
- 1895 2) DVT/PE (deep vein thrombosis/pulmonary embolism, i.e., blood clots in the venous  
1896 system).
- 1897 3) Suicide Attempt: A participant will be withdrawn if he/she attempts suicide at any time  
1898 during participation in the study.
- 1899 4) Psychiatric Hospitalization: A participant will be withdrawn if he/she is hospitalized for  
1900 psychiatric reasons at any time during participation in the study.

- 1901 5) Pregnancy: If participant indicates she is pregnant or has a positive pregnancy test at any  
 1902 time during the study, she will be withdrawn from the study, and this event will remain  
 1903 open until delivery. At that time the licensed medical professional will contact the  
 1904 participant to ask a few questions about the baby's health and will update the open  
 1905 'Medical Event Form'. A positive pregnancy test at Week 16 will trigger a 'Medical Event  
 1906 Form' to be completed but will not result in withdrawal since she is no longer receiving  
 1907 study product.
- 1908 6) Expired breath carbon monoxide increase: A participant will be withdrawn from the study  
 1909 if the average of two consecutive CO readings during the same visit is 100 ppm or greater.
- 1910 7) Marked increase in smoking: A participant will be withdrawn from the study if he/she meets  
 1911 **BOTH** of the following criteria for two consecutive weeks
- 1912 a. Cigarette per day increase: The average CPD increases by more than 100% from  
 1913 the average CPD during baseline.
- 1914 b. Expired breath carbon monoxide increase: If the average of two consecutive CO  
 1915 measurements in the same visit is
- 1916 i. CO is greater than 50 ppm if CO at Baseline 1 is <20 ppm.  
 1917 ii. CO is greater than 60 ppm if CO at Baseline 1 is 20 – 34 ppm.  
 1918 iii. CO is greater than 70 ppm if CO at Baseline 1 is 35 – 49 ppm.  
 1919 iv. CO is greater than 80 ppm if CO at Baseline 1 is 50 – 64 ppm.  
 1920 v. CO is greater than 90 ppm if CO at Baseline 1 is 65 – 80 ppm.
- 1921 c. Note: If the second consecutive visit is the last study visit, then the participant  
 1922 would not be withdrawn from the study.
- 1923 8) If a participant is discharged from or discontinues his or her methadone or buprenorphine  
 1924 treatment, they will be discontinued from the study.

1926 **The following will be monitored and can lead to the participant being withdrawn by the PI**  
 1927 **or Licensed Medical Professional:**

- 1928 1) Cigarettes per day increase: Continued participation will be evaluated by the site PI if the  
 1929 average number of cigarettes per day (CPD) increases by more than 100% from the  
 1930 average CPD during baseline as determined by CPD at Baseline 2.
- 1931 2) Blood pressure (BP) or heart rate (HR) changes: If any of the following occur post-  
 1932 enrollment: 1) BP is at or above 160/100 or below 90/50, or 2) HR is at or above 115 bpm  
 1933 or below 45 bpm a manual blood pressure and heart rate measurement will be taken after  
 1934 10 minutes have passed. If the manual reading is still out of range, a 'Blood Pressure and  
 1935 Heart Rate Symptom Checklist' and 'Medical Event Form' will be completed, and the  
 1936 participant will be monitored by the medical professional.
- 1937 3) Expired breath Carbon Monoxide increase: If the average of two consecutive CO  
 1938 measurements meets the criteria below then the 'Medical Event Form' will be completed  
 1939 and the participant will be monitored by the medical professional.
- 1940 a. CO is greater than 50 ppm if CO at Baseline 1 is <20 ppm.  
 1941 b. CO is greater than 60 ppm if CO at Baseline 1 is 20 – 34 ppm.  
 1942 c. CO is greater than 70 ppm if CO at Baseline 1 is 35 – 49 ppm.  
 1943 d. CO is greater than 80 ppm if CO at Baseline 1 is 50 – 64 ppm.  
 1944 e. CO is greater than 90 ppm if CO at Baseline 1 is 65 – 80 ppm.
- 1945 4) Any hospitalization or debilitation in which participation in the study could be detrimental  
 1946 to the recovery process. This will be self-reported by the participant and will be reviewed  
 1947 by the site PI and medical professional to determine whether continued participation in the  
 1948 study is appropriate.
- 1949 5) If a participant is behaving in an inappropriate or threatening manner, admits to lying about  
 1950 eligibility criteria, is participating in other smoking research studies that could affect the  
 1951 primary outcome measures, etc., then the PI can withdraw him/her from the study at the  
 1952 PI's discretion.
- 1953 6) If a participant fails to attend regularly scheduled research assessment visits or comply  
 1954 with the research procedures or schedule, then the PI can withdraw him/her from the study  
 1955 at the PI's discretion.

- 1956 7) Increase in psychiatric symptoms: Exacerbation in symptoms noted during the study (i.e.,  
1957 change in BDI category from mild to moderate or moderate to severe) will trigger review  
1958 by the study's licensed medical professional. The PI will withdraw the participant upon the  
1959 licensed medical professional's recommendation.  
1960

#### 14. Data Safety Monitoring Board

1961  
1962  
1963 A Data and Safety Monitoring Board (DSMB) has been established to monitor safety  
1964 outcomes and will be comprised of four members. The DSMB will be chaired by Kevin Delucchi,  
1965 PhD., Professor in Residence of Biostatistics in Psychiatry at the University of California San  
1966 Francisco and Director of the Quantitative Core of the San Francisco Treatment Research Center;  
1967 Eden Evins, MD, MPH., Cox Family Professor of Psychiatry at Harvard Medical School and  
1968 Director of Center for Addiction Medicine at Massachusetts General Hospital; Ari Kirshenbaum,  
1969 PhD, Professor of Psychology at Saint Michael's College who he teaches courses in  
1970 psychopharmacology and neuroscience, and currently has grants from NIH and NSF for work in  
1971 human behavioral pharmacology and his grant-funded work focuses on cognitive and behavioral  
1972 responses to nicotine and cannabinoids; and Elisabeth Johnson, Ph.D., who has over twenty  
1973 years of clinical experience in women's health and pediatrics, including caring for women with  
1974 substance use disorders.

#### Conflict of Interest

1975  
1976  
1977 None of the board members will be otherwise affiliated with the center and each member will  
1978 complete a conflict of interest disclosure form prior to each meeting. Ad hoc specialists may be  
1979 invited to participate as non-voting members at any time if additional expertise is desired.  
1980

#### Monitoring Activities and Frequency of Meetings

1981  
1982 The DSMB will set their own agenda and decisions about monitoring; e.g. how frequently to  
1983 monitor, what threshold requires changes to protocol or stopping the study, and whether to view  
1984 raw or analyzed data. The DSMB will be given FDA and EMEA guidelines for DSMBs and recent  
1985 reviews on DSMBs. A brief report will be generated from each meeting for the study record and  
1986 forwarded to each of the study site's Institutional Review Boards (IRB) and NIDA's Program  
1987 Officer with the progress report. The DSMB will be available to convene outside of the regular  
1988 meetings, if necessary. If concerns should arise regarding a particular subject, or any troublesome  
1989 trends in the experiences of participants, they will make appropriate recommendations for  
1990 changes in protocol, as needed. The project investigators will continue to examine safety data,  
1991 blind to study condition, in case they wish to make study modifications. Before modifications  
1992 are made, they will inform the DSMB and request their comments.

#### Communication Plan to IRB, NIDA, and FDA (if applicable)

1993  
1994  
1995 All IRBs, the FDA and the NIDA's Program Officer will be informed of any significant action  
1996 taken as a result of the Data and Monitoring Board's findings. Study Participants will be informed  
1997 of any changes in risk.  
1998

#### Protection of Confidentiality

1999  
2000 For DSMB meetings only de-identified data, including blinded study site and condition type,  
2001 will be provided to the board. All data and discussion during the meeting will be confidential.  
2002

#### 15. Investigational Tobacco Product

2003  
2004  
2005 The University of Vermont Center on Tobacco Regulatory Science will complete an  
2006 Investigational Tobacco Product (ITP) application with the FDA to cover the experimental  
2007 cigarettes being used in this study. This application encompasses both Project 3 sites.  
2008

#### 16. Certificate of Confidentiality



2010  
2011  
2012  
2013  
2014  
2015  
2016  
2017  
2018  
2019  
2020  
2021  
2022  
2023  
2024  
2025  
2026  
2027  
2028  
2029  
2030  
2031  
2032  
2033  
2034  
2035  
2036  
2037  
2038  
2039  
2040  
2041  
2042  
2043  
2044  
2045  
2046  
2047  
2048  
2049

To help protect the participant’s privacy, Dr. Stephen Higgins, PhD, will obtain a Certificate of Confidentiality from the national Institute on Drug Abuse. With this certificate, the researchers cannot be forced to disclose information that may identify the participants, even by a court subpoena, in any federal, state, or local civil, criminal, administrative, legislative, or other proceedings. The researchers will use the Certificate to resist any demands for information that would identify the participants, except as explained below. The Certificate cannot be used to resist a demand for information from personnel of the United States Government that is used for auditing or evaluation of federally funded projects or for information that must be disclosed in order to meet the requirements of the Federal Food and Drug Administration (FDA).

The Certificate of Confidentiality does not prevent the participant or a member of their family from voluntarily releasing information about themselves and their involvement in the research. If an insurer, employer or other person obtains the participant’s written consent to receive research information, then the researcher may not use the Certificate to withhold that information.

The Certificate of Confidentiality does not prevent the researchers from disclosing voluntarily, without consent, information that would identify the individual as a participant of the research project in instances such as evidence of child abuse or a participant's threatened violence to self or others.

**17. Outcome Variables**

**Primary Endpoints for Study 3:**

- 1) Cigarette Smoked per Day (CPD)
- 2) Nicotine Dependence Severity

**Secondary Endpoints for Study 3:**

- 1) Measures of adherence: non-study cigarette use, drop-out rate
- 2) Measures of psychiatric symptoms: BDI, OASIS
- 3) Measures of discomfort/dysfunction: MNWS, QSU
- 4) Measures of other health-related behaviors: breath alcohol, urine or salivary drug screen, TLFB-drug use, Alcohol Use Questionnaire, Drug Use Questionnaire, weight
- 5) Measures of nicotine/tobacco dependence: FTND, WISDM
- 6) Measures of tobacco exposure: CO, total nicotine equivalents, NNN, NNAL, minor alkaloids
- 7) Measures of intention to quit: Stages of Change, Contemplation Ladder
- 8) Measures of compensatory smoking: puff topography, filter analysis
- 9) Measures of other tobacco use: TLFB-other tobacco
- 10) Measures of cigarette characteristics: CES, Cigarette Purchase Task
- 11) Measures of cardiovascular function: heart rate, blood pressure, urine 11-dehydroTXB2
- 12) Measures of perceived risk: Perceived Health Risk Questionnaire
- 13) Safety outcome variables: Adverse Events (AEs), Serious Adverse Events (SAEs)

## References

1. Smith PH, Mazure CM, McKee SA. Smoking and mental illness in the U.S. population. *Tob Control*. 2014;23(e2):e147-153.
2. Benowitz NL, Henningfield JE. Establishing a nicotine threshold for addiction. The implications for tobacco regulation. *N Engl J Med*. 1994;331(2):123-125.
3. Benowitz NL, Henningfield JE. Reducing the nicotine content to make cigarettes less addictive. *Tob Control*. 2013;22 Suppl 1:i14-17.
4. Zeller M, Hatsukami D, Strategic Dialogue on Tobacco Harm Reduction G. The Strategic Dialogue on Tobacco Harm Reduction: a vision and blueprint for action in the US. *Tob Control*. 2009;18(4):324-332.
5. Benowitz NL, Hall SM, Stewart S, Wilson M, Dempsey D, Jacob P, 3rd. Nicotine and carcinogen exposure with smoking of progressively reduced nicotine content cigarette. *Cancer Epidemiol Biomarkers Prev*. 2007;16(11):2479-2485.
6. Benowitz NL, Dains KM, Hall SM, Stewart S, Wilson M, Dempsey D, Jacob P, 3<sup>rd</sup>. Smoking behavior and exposure to tobacco toxicants during 6 months of smoking progressively reduced nicotine content cigarettes. *Cancer Epidemiol Biomarkers Prev*. 2012;21(5):761-769.
7. Donny EC, Denlinger RL, Tidey JW, Koopmeiners JS, Benowitz NL, Vandrey RG, al'Absi M, Carmella SG, Cinciripini PM, Dermody SS, Drobos DJ, Hecht SS, Jensen J, Lane T, Le CT, McClernon FJ, Montoya ID, Murphy SE, Robinson JD, Stitzer ML, Strasser AA, Tindle H, Hatsukami DK. Randomized trial of reduced-nicotine standards for cigarettes. *N Engl J Med*. 2015 Oct;373(14):1340-9.
8. Hatsukami DK, Kotlyar M, Hertsgaard LA, Zhang Y, Carmella SG, Jensen JA, Allen SS, Shields PG, Murphy SE, Stepanov I, Hecht SS. Reduced nicotine content cigarettes: effects on toxicant exposure, dependence and cessation. *Addiction*. 2010;105(2):343- 355.
9. Higgins ST, Heil SH, Sigmon SC, Tidey JW, Gaalema DE, Stitzer ML, Durand H, Bunn JY, Priest JS, Arger CA, Miller ME, Bergeria CL, Davis DR, Streck JM, Zvorsky I, Redner R, Vandrey R, Pacek LR. Response to varying the nicotine content of cigarettes in vulnerable populations: an initial experimental examination of acute effects. *Psychopharmacology (Berl)*. 2017;234(1):89-98.
10. Higgins ST, Heil SH, Sigmon SC, Tidey JW, Gaalema DE, Stitzer ML, Durand H, Bunn JY, Priest JS, Arger CA, Miller ME, Bergeria CL, Davis DR, Streck JM, Reed DD, Skelly JM, Tursi L. Addiction potential of reduced nicotine content cigarettes in populations with psychiatric disorders and other vulnerabilities to tobacco addiction. *JAMA Psychiatry*. 2017;in press.
11. US Department of Health and Human Services. The Health Consequences of Smoking—50 Years of Progress: A Report of the Surgeon General. Atlanta: U.S. Department of Health and Human Services, Centers for Disease Control and Prevention, National Center for Chronic Disease Prevention and Health Promotion, Office on Smoking and Health, 2014.
12. Cook BL, Wayne GF, Kafali EN, Liu Z, Shu C, Flores M. Trends in smoking among adults with mental illness and association between mental health treatment and smoking cessation. *JAMA*. 2014; 311(2):172-82
13. Center for Behavioral Health Statistics and Quality. Behavioral health trends in the United States: Results from the 2014 National Survey on Drug Use and Health (HHS Publication No. SMA 15-4927, NSDUH Series H-50). 2015. Retrieved from <http://www.samhsa.gov/data/>
14. Grant BF, Hasin DS, Chou SP, Stinson FS, Dawson DA. Nicotine dependence and psychiatric disorders in the United States: results from the national epidemiologic survey on alcohol and related conditions. *Arch Gen Psychiatry*. 2004;61(11):1107-1115.
15. Prochaska JJ, Rossi JS, Redding CA, Rosen AB, Tsoh JY, Humfleet GL, Eisendrath SJ, Meisner MR, Hall SM. Depressed smokers and stage of change: implications for treatment interventions. *Drug Alc Depend*. 2004;76(2):143-151.
16. Young-Wolff KC, Fromont SC, Delucchi K, Hall SE, Hall SM, Prochaska JJ. PTSD symptomatology and readiness to quit smoking among women with serious mental illness. *Addict Behav*. 2014;39(8):1231-4.
17. Cooper J, Borland R, McKee SA, Yong HH, Dugué PA. Depression motivates quit attempts but

- 2104 predicts relapse: differential findings for gender from the International Tobacco Control Study.  
2105 *Addiction*. 2016;111(8):1438-47.
- 2106 18. Hitsman B, Papandonatos GD, McChargue DE, DeMott A, Herrera MJ, Spring B, Borrelli B,  
2107 Niaura R. Past major depression and smoking cessation outcome: a systematic review and  
2108 meta-analysis update. *Addiction*. 2013;108(2):294-306.
- 2109 19. Callaghan RC, Veldhuizen S, Jeysingh T, Orlan C, Graham C, Kakouris G, Remington G,  
2110 Gatley J. Patterns of tobacco-related mortality among individuals diagnosed with  
2111 schizophrenia, bipolar disorder, or depression. *J Psychiatr Res*. 2014;48(1):102-110.
- 2112 20. Goodwin RD, Lavoie KL, Lemeshow AR, Jenkins E, Brown ES, Fedoronko DA. Depression,  
2113 anxiety, and COPD: the unexamined role of nicotine dependence. *Nicotine Tob Res*.  
2114 2012;14(2):176-183.
- 2115 21. Leventhal AM, Zvolensky MJ. Anxiety, depression, and cigarette smoking: a transdiagnostic  
2116 vulnerability framework to understanding emotion-smoking comorbidity. *Psychol Bull*.  
2117 2015;141(1):176- 212.
- 2118 22. Watson D. Differentiating the mood and anxiety disorders: a quadripartite model. *Annu Rev Clin*  
2119 *Psychol*. 2009;5:221-247.
- 2120 23. Taylor G, McNeill A, Girling A, Farley A, Lindson-Hawley N, Aveyard P. Change in mental  
2121 health after smoking cessation: systematic review and meta-analysis. *BMJ*. 2014;348:g1151.  
2122 Erratum in: *BMJ*. 2014;348:g2216.
- 2123 24. Shiffman S, Patten C, Gwaltney C, Paty J, Gnys M, Kassel J, Hickcox M, Waters A, Balabanis  
2124 M. Natural history of nicotine withdrawal. *Addiction*. 2006;101(12):1822-1832.
- 2125 25. Weinberger AH, Desai RA, McKee SA. Nicotine withdrawal in U.S. smokers with current mood,  
2126 anxiety, alcohol use, and substance use disorders. *Drug Alcohol Depend*. 2010;108(1-2):7-12.
- 2127 26. Garey L Bakhshaie J, Brandt CP, Langdon KJ, Kauffman BY, Schmidt NB, Leventhal AM,  
2128 Zvolensky MJ. Interplay of dysphoria and anxiety sensitivity in relation to emotion regulatory  
2129 cognitions of smoking among treatment-seeking smokers. *Am J Addict*. 2016;25(4):267-274.
- 2130 27. Pang RD, Khoddam R, Guillot CR, Leventhal AM. Depression and anxiety symptoms  
2131 moderate the relation between negative reinforcement smoking outcome expectancies and  
2132 nicotine dependence. *J Stud Alcohol Drugs*. 2014;75(5):775-80.
- 2133 28. Weinberger AH, George TP, McKee SA. Differences in smoking expectancies in smokers with  
2134 and without a history of major depression. *Addict Behav*. 2011;36(4):434- 437.
- 2135 29. Wise RA. Dopamine and reward: the anhedonia hypothesis 30 years on. *Neurotox Res*.  
2136 2008;14(2- 3):169-83.
- 2137 30. Brody AL, Olmstead RE, Abrams AL, Costello MR, Khan A, Kozman D, Saxena S, Farahi J,  
2138 London ED, Mandelkern MA.. Effect of a history of major depressive disorder on smoking-  
2139 induced dopamine release. *Biol Psychiatry*. 2009;66(9):898-901.
- 2140 31. Audrain-McGovern J, Wileyto EP, Ashare R, Cuevas J, Strasser AA. Reward and affective  
2141 regulation in depression-prone smokers. *Biol Psychiatry*. 2014;76(9):689-697.
- 2142 32. Spring B, Pingitore R, McChargue DE. Reward value of cigarette smoking for comparably  
2143 heavy smoking schizophrenic, depressed and nonpatient smokers. *Am J Psychiatry*.  
2144 2003;160(2):316-322.
- 2145 33. Chaudhri N, Caggiula AR, Donny EC, Palmatier MI, Liu X, Sved AF. Complex interactions  
2146 between nicotine and nonpharmacological stimuli reveal multiple roles for nicotine in  
2147 reinforcement. *Psychopharmacology (Berl)*. 2006;184(3-4):353-366.
- 2148 34. Donny EC, Chaudhri N, Caggiula AR, Evans-Martin FF, Booth S, Gharib MA, Clements LA,  
2149 Sved AF. Operant responding for a visual reinforcer in rats is enhanced by noncontingent  
2150 nicotine: implications for nicotine self-administration and reinforcement. *Psychopharmacology*  
2151 *(Berl)*. 2003;169(1):68-76.
- 2152 35. US Congress. Family Smoking Prevention and Tobacco Control Act. In: Congress US (ed)  
2153 H.R. 1256 U. S. Government Printing Office, Washington, D.C., 2009.
- 2154 36. Donny EC, Hatsukami DK, Benowitz NL, Sved AF, Tidey JW, Cassidy RN. Reduced nicotine  
2155 product standards for combustible tobacco: building an empirical basis for effective regulation.  
2156 *Prev Med*. 2014;68:17-22.
- 2157 37. Weinberger AH, Mazure CM, Morlett A, McKee SA. Two decades of smoking cessation

- 2158 treatment research on smokers with depression: 1990-2010. *Nicotine Tob Res.*  
2159 2013;15(6):1014-1031.
- 2160 38. Gaalema DE, Miller ME, Tidey JW. Predicted impact of nicotine reduction on smokers with  
2161 affective disorders. *Tob Regul Sci.* 2015;1(2):154-165.
- 2162 39. Tidey JW, Pacek L, Koopmeiners JS, Vandrey R, Nardone N, Drobles DJ, Benowitz NL,  
2163 Dermody SS, Lemieux A, Denlinger RL, Cassidy R, al'Absi M, Hatsukami DK, Donny EC.  
2164 Effects of 6-week use of reduced-nicotine content cigarettes in smokers with and without  
2165 elevated depressive symptoms. 2017;19(1):59-67.
- 2166 40. Dawkins L, Kimber C, Puwanesarasa Y, Soar K. First- versus second-generation electronic  
2167 cigarettes: predictors of choice and effects on urge to smoke and withdrawal symptoms.  
2168 *Addiction.* 2015;110(4):669-77.
- 2169 41. Farsalinos KE, Spyrou A, Tsimopoulou K, Stefopoulos C, Romagna G, Voudris V. Nicotine  
2170 absorption from electronic cigarette use: comparison between first and new- generation  
2171 devices. *Sci Rep.* 2014;4:4133.
- 2172 42. Goniewicz ML, Kuma T, Gawron M, Knysak J, Kosmider L. Nicotine levels in electronic  
2173 cigarettes. *Nicotine Tob Res.* 2013;15(1):158-166.
- 2174 43. Talih S, Balhas Z, Eissenberg T, Salman R, Karaoghlanian N, El Hellani A, Baalbaki R, Saliba  
2175 N, Shihadeh A. Effects of user puff topography, device voltage, and liquid nicotine  
2176 concentration on electronic cigarette nicotine yield: measurements and model predictions.  
2177 *Nicotine Tob Res.* 2015;1(2):150-7.
- 2178 44. Trtchouniam A, William, M, Talbot P. Conventional and electronic cigarettes (e- Cigarettes)  
2179 have different smoking characteristics. *Nicotine Tob Res.* 2010;12(9):905- 912.
- 2180 45. Farsalinos KE, Polosa R. Safety evaluation and risk assessment of electronic cigarettes as  
2181 tobacco cigarette substitutes: a systematic review. *Ther Adv Drug Saf.* 2014;5(2):67- 86.
- 2182 46. Rom O, Pecorelli A, Valacchi G, Reznick AZ. Are E-cigarettes a safe and good alternative to  
2183 cigarette smoking? *Ann N Y Acad Sci.* 2015;1340:65-74.
- 2184 47. Hecht SS, Carmella SG, Kotandeniya D, Pillsbury ME, Chen M, Ransom BW, Vogel RI,  
2185 Thompson E, Murphy SE, Hatsukami DK. Evaluation of toxicant and carcinogen metabolites in  
2186 the urine of e-cigarette users versus cigarette smokers. *Nicotine Tob Res.* 2015;17(6):704-709.
- 2187 48. Goniewicz ML, Gawron M, Smith DM, Peng M, Jacob P 3rd, Benowitz NL. Exposure to nicotine  
2188 and selected toxicants in cigarette smokers who switched to electronic cigarettes: A  
2189 longitudinal within- subjects observational study. *Nicotine Tob Res.* 2017;9(2):160-167.
- 2190 49. Cummins SE, Zhu S-H, Tedeschi GJ, Camst AC, Myers MG. Use of e-cigarettes by individuals  
2191 with mental health conditions. *Tob Control.* 2014;23 Suppl 3:iii48-53.
- 2192 50. Spears CA, Jones DM, Weaver SR, Pechacek TF, Eriksen MP. Use of electronic nicotine  
2193 delivery systems among adults with mental health conditions. *Int J Environ Res Public Health.*  
2194 2017;14(1), pii: E10.
- 2195 51. Pulvers K, Hayes RB, Scheuermann TS, Romero DR, Emami AS, Resnicow K, Olendzki E,  
2196 Person SD, Ahluwalia JS. Tobacco use, quitting behavior, and health characteristics among  
2197 current electronic cigarette users in a national tri-ethnic adult stable smoker sample. *Nicotine  
2198 Tob Res.* 2015;17(9):1085- 1095
- 2199 52. Biener L, Hargraves JL. A longitudinal study of electronic cigarette use among a population-  
2200 based sample of adult smokers: association with smoking cessation and motivation to quit.  
2201 *Nicotine Tob Res.* 2015;17(2):127-33.
- 2202 53. Dunbar MS, Shadel WG, Tucker JS, Edelen MO. Use of and reasons for using multiple other  
2203 tobacco products in daily and nondaily smokers: Associations with cigarette consumption and  
2204 nicotine dependence. *Drug Alc Depend.* 2016;168:156-163.
- 2205 54. Etter JF, Bullen C. Electronic cigarettes: users profile, utilization, satisfaction and perceived  
2206 efficacy. *Addiction.* 2011;106(11):2017-2028.
- 2207 55. Tackett AP, Lechner WV, Meier E, Grant DM, Driskill LM, Tahirkheli NN, Wagener TL.  
2208 Biochemically verified smoking cessation and vaping beliefs among vape store customers.  
2209 *Addiction.* 2015;110(5):868-874.
- 2210 56. Hefner K, Rosenheck R, Merrel J, Coffman M, Valentine G, Sofuoglu M. E-cigarette use in  
2211 Veterans seeking mental health and/or substance use services. *J Dual Diagn.* 2016;12(2):109-

- 2212 17.
- 2213 57. Hefner K, Valentine G, Sofuoglu M. Electronic cigarettes and mental illness: Reviewing the  
2214 evidence for help and harm among those with psychiatric and substance use disorders. *Am J*  
2215 *Addict*. 2017 Feb 2. doi: 10.1111/ajad.12504. [Epub ahead of print]
- 2216 58. Miller ME, Tidey JW, Rohsenow DJ, Higgins ST. Electronic cigarette expectancies in smokers  
2217 with psychological distress. *Tob Regul Sci*. 2017;3(1):108-114.
- 2218 59. Pratt SI, Sargent J, Daniels L, Santos MM, Brunette M. Appeal of electronic cigarettes in  
2219 smokers with serious mental illness. *Addict Behav*. 2016;59:30-34.
- 2220 60. Bullen C, Howe C, Laugesen M, McRobbie H, Parag V, Williman J, Walker N. Electronic  
2221 cigarettes for smoking cessation: a randomised controlled trial. *Lancet*. 2013;382(9905):1629-  
2222 37.
- 2223 61. Caponnetto P, Auditore R, Russo C, Cappello GC, Polosa R. Impact of an electronic cigarette  
2224 on smoking reduction and cessation in schizophrenic smokers: a prospective 12-month pilot  
2225 study. *Int J Environ Res Public Health*. 2013;10(2):446-461.
- 2226 62. Tseng TY, Ostroff JS, Campo A, Gerard M, Kirchner T, Rotrosen J, Shelley D. A randomized  
2227 trial comparing the effect of nicotine versus placebo electronic cigarettes on smoking reduction  
2228 among young adult smokers. *Nicotine Tob Res*. 2016;18(10):1937- 1943.
- 2229 63. Walton KM, Abrams DB, Bailey WC, Clark D, Connolly GN, Djordjevic MV, Eissenberg TE,  
2230 Fiore MC, Goniewicz ML, Haverkos L, Hecht SS, Henningfield JE, Hughes JR, Oncken CA,  
2231 Postow L, Rose JE, Wanke KL, Yang L, Hatsukami DK. NIH Electronic Cigarette Workshop:  
2232 Developing a Research Agenda. *Nicotine Tob Res*. 2015;17(2):259-69.
- 2233 64. Adriaens K, Van Gucht D, Declerck P, Baeyens F. Effectiveness of the electronic cigarette: An  
2234 eight- week Flemish study with six-month follow-up on smoking reduction, craving and  
2235 experienced benefits and complaints. *Int J Environ Res Public Health*. 2014;11(11):11220-  
2236 11248.
- 2237 65. Prochaska JJ, Grana RA. E-cigarette use among smokers with serious mental illness. *PLoS*  
2238 *One*. 2014;9(11):e113013.
- 2239 66. O'Brien B, Knight-West O, Walker N, Parag V, Bullen C. E-cigarettes versus NRT for smoking  
2240 reduction or cessation in people with mental illness: secondary analysis of data from the  
2241 ASCEND trial. *Tob Induc Dis*. 2015;13(1):5.
- 2242 67. Rohsenow DJ, Tidey JW, Martin RA, Colby S, Eissenberg T. Electronic cigarettes effects on  
2243 smoking, CO and motivation: A pilot study. Presented at the combined meeting of the Society  
2244 for Research on Nicotine and Tobacco and the Society for Research on Nicotine and Tobacco-  
2245 Europe, Florence, Italy. 2017.
- 2246 68. Glasser AM, Collins L, Pearson JL, Abudayyeh H, Niaura RS, Abrams DB, Villanti AC.  
2247 Overview of Electronic Nicotine Delivery Systems: A Systematic Review. *Am J Prev Med*.  
2248 2017;52(2):e33-e66.
- 2249 69. Dawkins L, Turner J, Hasna S, Soar K. The electronic-cigarette: Effects on desire to smoke,  
2250 withdrawal symptoms and cognition. *Addict Behav*. 2012;37(8):970-973.
- 2251 70. Vansickel AR, Cobb CO, Weaver MF, Eissenberg TE. A clinical laboratory model for evaluating  
2252 the acute effects of electronic "cigarettes": nicotine delivery profile and cardiovascular and  
2253 subjective effects. *Cancer Epidemiol Biomarkers Prev*. 2010;19(8):1945-53.
- 2254 71. Lechner WV, Meier E, Wiener JL, Grant DM, Gilmore J, Judah MR, Mills AC, Wagener TL. The  
2255 comparative efficacy of first- versus second-generation electronic cigarettes in reducing  
2256 symptoms of nicotine withdrawal. *Addiction*. 2015;10(5):862-867.
- 2257 72. Vansickel AR, Eissenberg T. Electronic cigarettes: effective nicotine delivery after acute  
2258 administration. *Nicotine Tob Res*. 2013;15(1):267-270.
- 2259 73. Vansickel AR, Weaver MF, Eissenberg T. Clinical laboratory assessment of the abuse liability  
2260 of an electronic cigarette. *Addiction*. 2012;107(8):1493-500.
- 2261 74. Bonhomme MG, Holder-Hayes E, Ambrose BK, Tworek C, Feirman SP, King BA, Apelberg BJ.  
2262 Flavoured non-cigarette tobacco product use among US adults: 2013- 2014. *Tob Control*.  
2263 2016;25(Suppl 2):ii4-ii13.
- 2264 75. Villanti AC, Johnson AL, Ambrose BK, Cummings KM, Stanton CA, Rose SW, Feirman SP,  
2265 Tworek C, Glasser AM, Pearson JL, Cohn AM, Conway KP, Niaura RS, Bansal- Travers M,

- 2266 Hyland A. Flavored tobacco product use in youth and adults: Findings from the first wave of  
 2267 the PATH Study (2013-2014). *Am J Prev Med.* 2017 Mar 13. doi:  
 2268 10.1016/j.amepre.2017.01.026. [Epub ahead of print]
- 2269 76. Audrain-McGovern J, Strasser AA, Wileyto EP. The impact of flavoring on the rewarding and  
 2270 reinforcing value of e-cigarettes with nicotine among young adult smokers. *Drug Alcohol*  
 2271 *Depend* 2016;166:263-7.
- 2272 77. Goldenson NI, Kirkpatrick MG, Barrington-Trimis JL, Pang RD, McBeth JF, Pentz MA, Samet  
 2273 JM, Leventhal AM. Effects of sweet flavorings and nicotine on the appeal and sensory  
 2274 properties of e- cigarettes among young adult vapers: Application of a novel methodology.  
 2275 *Drug Alcohol Depend.* 2016;168:176-180.
- 2276 78. Berg CJ. Preferred flavors and reasons for e-cigarette use and discontinued use among never,  
 2277 current, and former smokers. *Int J Public Health.* 2016 Mar;61(2):225-36.
- 2278 79. Kistler CE, Crutchfield TM, Sutfin EL, Ranney LM, Berman ML, Zarkin GA, Goldstein AO.  
 2279 Consumers' Preferences for Electronic Nicotine Delivery System Product Features: A  
 2280 Structured Content Analysis. *Int J Environ Res Public Health.* 2017;14(6). doi:  
 2281 10.3390/ijerph14060613
- 2282 80. Czoli CD, Goniewicz M, Islam T, Kotnowski K, Hammond D. Consumer preferences for  
 2283 electronic cigarettes: results from a discrete choice experiment. *Tob Control.* 2016;25(e1):e30-  
 2284 6.
- 2285 81. Pesko MF, Kenkel DS, Wang H, Hughes JM. The effect of potential electronic nicotine delivery  
 2286 system regulations on nicotine product selection. *Addiction.* 2016;111(4):734- 44.
- 2287 82. Etter JF. Electronic cigarettes: a survey of users. *BMC Public Health.* 2010;10:231. doi:  
 2288 10.1186/1471- 2458-10-231.
- 2289 83. Farsalinos KE, Romagna G, Tsiapras D, Kyrzopoulos S, Spyrou A, Voudris V. Impact of  
 2290 flavour variability on electronic cigarette use experience: an internet survey. *Int J Environ Res*  
 2291 *Public Health* 2013;10(12):7272-82.
- 2292 84. Yingst JM, Veldheer S, Hrabovsky S, Nichols TT, Wilson SJ, Foulds J. Factors associated with  
 2293 electronic cigarette users' device preferences and transition from first generation to advanced  
 2294 generation devices. *Nicotine Tob Res.* 2015;17(10):1242-6.
- 2295 85. Litt MD, Duffy V, Oncken C. Cigarette smoking and electronic cigarette vaping patterns as a  
 2296 function of e-cigarette flavourings. *Tob Control.* 2016; 25(Suppl 2):ii67-ii72.
- 2297 86. Hickman NJ 3rd, Delucchi KL, Prochaska JJ. Menthol use among smokers with psychological  
 2298 distress: findings from the 2008 and 2009 National Survey on Drug Use and Health. *Tob*  
 2299 *Control.* 2014;23(1):7- 13.
- 2300 87. Cohn AM, Johnson AL, Hair E, Rath JM, Villanti AC. Menthol tobacco use is correlated with  
 2301 mental health symptoms in a national sample of young adults: implications for future health  
 2302 risks and policy recommendations. *Tob Induc Dis.* 2016;14:1. doi:10.1186/s12971-015-0066-3.
- 2303 88. Kroenke, K., Spitzer, R. L., Williams, J. B. W., Löwe, B. (2009). An ultra-brief screening scale  
 2304 for anxiety and depression: the PHQ-4 Psychosomatics, 50, 613-621.
- 2305 89. Kroenke K, Spitzer RL, Williams JB. The PHQ-9: validity of a brief depression severity  
 2306 measure. *J Gen Intern Med.* 2001;16(9):606-13.
- 2307 90. Spitzer RL, Kroenke K, Williams JB, Löwe B. A brief measure for assessing generalized anxiety  
 2308 disorder: the GAD-7. *Ach Intern Med.* 2006 May 22;166(10):1092-7.
- 2309 91. Beck AT, Steer RA, Brown GK. Manual for Beck Depression Inventory – II 1996; San Antonio,  
 2310 TX: Psychological Corporation.
- 2311 92. Norman SB, Cissell SH, Means-Christensen AJ, Stein MB. Development and validation of an  
 2312 Overall Anxiety Severity And Impairment Scale (OASIS). *Depress Anxiety.* 2006;23(4):245-  
 2313 249.
- 2314 93. Sheehan DV, Lecrubier Y, Sheehan KH, et al. The Mini-International Neuropsychiatric  
 2315 Interview (M.I.N.I.): the development and validation of a structured diagnostic psychiatric  
 2316 interview for DSM-IV and ICD-10. *J Clin Psychiatry.* 1998;59 Suppl 20:22-33.
- 2317 94. Sheehan DV, Lecrubier Y, Sheehan K, Harnett, Janavs J, Weiller E, et al. (1997). The validity  
 2318 of the Mini International Neuropsychiatric Interview (MINI) according to the SCID- P and its  
 2319 reliability. *Eur Psychiat* 12, 232–241.

- 2320 95. Babor TF, de la Fuente JR, Saunders J, Grant M. AUDIT: The Alcohol Use Disorders  
2321 Identification Test. Guidelines for use in primary health care. Geneva : World Health  
2322 Organization, 1992.
- 2323 96. Skinner HA. The Drug Abuse Screening Test. *Addict Behav.* 1982; 7(4):363-371.
- 2324 97. Piper ME, McCarthy DE, Bolt DM, Smith SS, Lerman C, Benowitz N, et al. Assessing  
2325 dimensions of nicotine dependence: An evaluation of the Nicotine Dependence Syndrome  
2326 Scale (NDSS) and the Winsdomsin Inventory of Smoking Dependence Motives (WISDM)  
2327 Nicotine & Tobacco Research. 2008;10:1009-1020.
- 2328 98. Heatherton TF, Kozlowski LT, Frecker RC, Fagerström KO. The Fagerström Test for Nicotine  
2329 Dependence: a revision of the Fagerström Tolerance Questionnaire. *Br J Addict.*  
2330 1991;86(9):1119-1127.
- 2331 100. Foulds J, Veldheer S, Yingst J, Wilson SJ, Nichols TT, Eissenberg T. Development of a  
2332 questionnaire for assessing dependence on electronic cigarettes among a large sample of ex-  
2333 smoking E-cigarette users. *Nicotine Tob Res.* 2015; 17(2): 186-92.
- 2334 101. DiClemente CC, Prochaska JO, Fairhurst SK, Velicer WF, Velasquez MM, Rossi JS. The  
2335 process of smoking cessation: an analysis of precontemplation, contemplation, and preparation  
2336 stages of change. *J Consult Clin Psychol.* 1991;59(2):295-304.
- 2337 102. Cohen S, Kamarck T, Mermelstein R. A global measure of perceived stress. *J Health Soc  
2338 Behav.* 1983;24(4):385-396.
- 2339 103. Hatsukami DK, Kotlyar M, Hertsgaard LA, et al. Reduced nicotine content cigarettes: effects on  
2340 toxicant exposure, dependence and cessation. *Addiction.* 2010;105(2):343- 355.
- 2341 104. Watson D, Clark LA, Tellegen A. Development and validation of brief measures of positive and  
2342 negative affect: the PANAS scales. *J Pers Soc Psychol.* 1988;54(6):1063-
- 2343 105. Hughes JR, Hatsukami D. Signs and symptoms of tobacco withdrawal. *Arch Gen Psychiatry.*  
2344 1986;43(3):289-294.
- 2345 106. Cox LS, Tiffany ST, Christen AG. Evaluation of the brief questionnaire of smoking urges (QSU-  
2346 brief) in laboratory and clinical settings. *Nicotine Tob Res.* 2001;3(1):7-16.
- 2347 107. Dowd AN, Motschman CA, Tiffany ST. Development and Validation of the Questionnaire of Vaping  
2348 Craving. *Nicotine Tob Res.* 2019;12(1):63-70.
- 2349 108. Cappelleri JC, Bushmakin AG, Baker CL, Merikle E, Olufade AO, Gilbert DG. Confirmatory  
2350 factor analyses and reliability of the modified cigarette evaluation questionnaire. *Addict Behav.*  
2351 2007;32(5):912-923.
- 2352 109. Jacobs EA, Bickel WK. Modeling drug consumption in the clinic using simulation procedures:  
2353 demand for heroin and cigarettes in opioid-dependent outpatients. *Exp Clin Psychopharmacol.*  
2354 1999;7(4):412-426.
- 2355 110. Cassidy RN, Tidey JW, Colby SM, Long V, Higgins ST. Initial development of an e- cigarette  
2356 purchase task: a mixed methods study. *Tob Regul Sci.* 2017; 3(2): 139-150.
- 2357 111. Grace RC, Kivel BM, Laugesen M. Estimating cross-price elasticity of e-cigarettes using a  
2358 simulated demand procedure. *Nicotine Tob Res.* 2015 May;17(5):592-598.
- 2359 112. Snaith RP, Hamilton M, Morley S, Humayan A, Hargreaves D, Trigwell P. A scale for the  
2360 assessment of hedonic tone the Snaith–Hamilton Pleasure Scale. *British Journal of Psychiatry.*  
2361 1995;167:99–103.  
2362

2363 **STUDY PROTOCOL: SMOKERS WITH OPIOID USE DISORDER**

2364 **Table of Contents**

2365 1. OBJECTIVE ..... 50

2366 2. SIGNIFICANCE..... 51

2367 2.1 Opioid Use Disorders (OUD) and Smoking..... 51

2368 2.2 Reducing the Addiction Potential of Tobacco Products ..... 51

2369 2.3 Relevance of the Project to the Integrative Theme and Goals of the TCORS ..... 52

2370 2.4 Relevance to the Scientific Domains and Priorities of the FDA CTP ..... 52

2371 2.5 How study outcomes will improve scientific knowledge related to the manufacture,  
2372 distribution, and marketing of tobacco products..... 52

2373 3. RATIONALE ..... 52

2374 3.1 Effects of Nicotine Reduction in Smokers With OUD ..... 52

2375 3.2 Increasing Appeal of Alternative Non-Combusted Nicotine Sources ..... 54

2376 3.3 E-Cig Use ..... 54

2377 3.4 E-Cig Effects on Smoking ..... 55

2378 3.5 Importance of E-Cig Flavors ..... 55

2379 3.6 Products to be Tested ..... 55

2380 3.7 Summary ..... 56

2381 4. PROJECT STUDY METHODS ..... 56

2382 5. STUDY SCREENING PROCEDURES ..... 56

2383 5.1 Participants ..... 56

2384 5.2 Recruitment..... 57

2385 5.3 Informed Consent Process..... 59

2386 5.4 Screening Measures ..... 59

2387 5.5 Suicidality/Mental Health Monitoring ..... 61

2388 5.6 Inclusion/Exclusion Criteria ..... 61

2389 5.7 Eligibility Determination..... 63

2390 6. STUDY BASELINE PROCEDURES ..... 63

2391 6.1 Visit Scheduling Requirements for Baseline Period ..... 65

2392 6.2 Measures/Assessments ..... 65

2393 6.3 E-Cigarette Training Sessions ..... 67

2394 6.4 Interactive Voice Response System ..... 67

2395 7. STUDY EXPERIMENTAL PROCEDURES ..... 68

2396 7.1 Experimental Period..... 68

2397 7.2 Experimental Visits Weeks 1, 3, 5, 7, 9, 11, 13, and 15 Procedures ..... 69

2398 7.2.A. Measures/Assessments ..... 69

2399 7.3 Experimental Visits Weeks 2, 4, 6, 8, 10, 12, 14, and 16 Procedures ..... 69



|      |                                                                                                 |    |
|------|-------------------------------------------------------------------------------------------------|----|
| 2400 | 7.3.A. Measures/Assessments .....                                                               | 69 |
| 2401 | 7.4 Interactive Voice Response System .....                                                     | 70 |
| 2402 | 7.5 Variable Incentive Program.....                                                             | 70 |
| 2403 | 7.6 Product and Procedures Compliance Review Sessions .....                                     | 71 |
| 2404 | 7.7 Quit Attempts During the Study Protocol .....                                               | 72 |
| 2405 | 7.7.A. If a participant is currently abstaining from smoking with the intention to quit.....    | 72 |
| 2406 | 7.7.B. If a participant is planning to quit smoking, but has not initiated the quit attempt.... | 72 |
| 2407 | 7.8 Abstinance Assessment Session .....                                                         | 72 |
| 2408 | 7.8.A. Participants Who Meet Criteria for Abstinance.....                                       | 73 |
| 2409 | 7.8.A.1. Measures/Assessments .....                                                             | 73 |
| 2410 | 7.8.B. Participants Who Do Not meet Criteria for Abstinance.....                                | 73 |
| 2411 | 7.8.B.1. Measures/Assessments .....                                                             | 73 |
| 2412 | 7.9 Participant Compensation .....                                                              | 74 |
| 2413 | 7.10 End of Study.....                                                                          | 74 |
| 2414 | 7.11 30-day Follow Up Phone Call.....                                                           | 75 |
| 2415 | 8. STUDY RANDOMIZATION.....                                                                     | 75 |
| 2416 | 8.1 Randomization Process .....                                                                 | 75 |
| 2417 | 8.2 Study Product Administration.....                                                           | 76 |
| 2418 | 8.3 Guidelines for Reporting Other Nicotine Product Use.....                                    | 76 |
| 2419 | 8.4 Study Product Accountability .....                                                          | 76 |
| 2420 | 9. STUDY 3 STATISTICAL METHODS AND SAMPLE SIZE .....                                            | 76 |
| 2421 | 9.1 Statistical Methods .....                                                                   | 77 |
| 2422 | 9.2 Sample Size .....                                                                           | 77 |
| 2423 | 10. POTENTIAL RISKS OF PARTICIPATION.....                                                       | 78 |
| 2424 | 10.1 Risks of Participation .....                                                               | 78 |
| 2425 | 10.2 Avoiding Risk to Fetus .....                                                               | 80 |
| 2426 | 10.3 Expected Benefits of Participation .....                                                   | 80 |
| 2427 | 11. PROTECTION AGAINST RISK .....                                                               | 80 |
| 2428 | 11.1 Data Collection Protections.....                                                           | 80 |
| 2429 | 11.2 Data Storage .....                                                                         | 81 |
| 2430 | 12. ADVERSE EVENTS.....                                                                         | 81 |
| 2431 | 13. WITHDRAWAL OR MONITORING OF PARTICIPANTS.....                                               | 81 |
| 2432 | 14. DATA SAFETY MONITORING BOARD .....                                                          | 83 |
| 2433 | 15. INVESTIGATIONAL TOBACCO PRODUCT .....                                                       | 83 |
| 2434 | 16. CERTIFICATE OF CONFIDENTIALITY.....                                                         | 83 |
| 2435 | 17. OUTCOME VARIABLES.....                                                                      | 84 |
| 2436 | 18. REFERENCES.....                                                                             | 85 |
| 2437 |                                                                                                 |    |

## Abbreviations

2438

- 2439 • 3HC: 3-hydroxycotinine
- 2440 • BAL: Breath alcohol levels
- 2441 • BDI: Beck's Depression Inventory
- 2442 • BMI: Body Mass Index
- 2443 • BP: Blood pressure
- 2444 • BPM: Beats per minute
- 2445 • BRIEF-A: Behavioral Rating Inventory of Executive Function
- 2446 • CES: Cigarette Evaluation Scale
- 2447 • CO: Carbon monoxide
- 2448 • COT: Cotinine
- 2449 • CPD: Cigarettes per day
- 2450 • CPT: Cigarette Purchase Task
- 2451 • CPT: Continuous Performance Task
- 2452 • DAST: Drug Abuse Screening Test
- 2453 • DDT: Delay Discounting Task
- 2454 • D-KEFS: Delis-Kaplan Executive Function System
- 2455 • EDC: Electronic Data Capture
- 2456 • EQ-5D: Euro-Qol
- 2457 • FSPTCA: Family Smoking Prevention and Tobacco Control Act
- 2458 • FTND: Fagerström Test for Nicotine Dependence
- 2459 • GAD: Generalized Anxiety Disorder
- 2460 • HR: Heart rate
- 2461 • IVR: Interactive Voice Response
- 2462 • MDD: Major Depressive Disorder
- 2463 • MINI: Mini International Neuropsychiatric Interview
- 2464 • MNWS: Minnesota Nicotine Withdrawal Scale
- 2465 • NMR: Nicotine metabolite ratio
- 2466 • NNAL: 4-(methylnitrosamino)-1-(3-pyridyl)-1-butanol
- 2467 • NNC: Normal nicotine content
- 2468 • NNN: *N*-nitrosonornicotine
- 2469 • OASIS: Overall Anxiety Severity and Impairment Scale
- 2470 • OUD: Opioid Use Disorder
- 2471 • PANAS: Positive and Negative Affect Schedule
- 2472 • PHQ: Patient Health Questionnaire
- 2473 • PSS: Perceived Stress Scale
- 2474 • QSU: Questionnaire of Smoking Urges
- 2475 • RNC: Reduced nicotine content
- 2476 • SST: Stop Signal Task
- 2477 • TLFB: Timeline Follow Back
- 2478 • TPQ: Time Perspectives Questionnaire
- 2479 • VLNC: Very low nicotine content
- 2480 • WASI-II: Wechsler Abbreviated Scale of Intelligence-II
- 2481 • WISDM: Wisconsin Index of Smoking Dependence Motives

## Protocol

### 1. OBJECTIVE

Prevalence of smoking among individuals with opioid use disorder (OUD) is six-fold that of the general US adult population. The mortality rate of opioid-dependent smokers is four times that of opioid-dependent nonsmokers, and their response to smoking cessation interventions is notoriously poor. A national policy of reducing the nicotine content of cigarettes has the potential to be an effective method of reducing tobacco use prevalence, dependence, and related adverse health outcomes. Controlled trials in the general smoker population have demonstrated that switching smokers to very low nicotine content cigarettes (VLNCCs) results in reductions in cigarettes per day (CPD), dependence and tobacco toxicant exposure, with few adverse consequences. Furthermore, our work during the current funding period indicates that smokers with OUD also respond to reductions in cigarette nicotine content with reductions in cigarette demand and other measures of addiction potential, although to a lesser extent than the other vulnerable smoker populations we have been examining (i.e., economically disadvantaged women, individuals with affective disorders). We believe that the impact of reduced nicotine standards on use of combusted cigarettes in this highly tobacco addicted population will be moderated considerably by other tobacco market conditions including (1) availability of alternative sources of non-combusted nicotine, and (2) whether these alternatives are available under conditions that optimize their appeal. We hypothesize the same for other vulnerable populations as well, but achieving significant reductions in use of combusted cigarettes in smokers with OUD seems especially unlikely in the absence of readily available and appealing alternative sources of non-combusted nicotine.

The goal of the proposed trial is to experimentally model whether increased availability and appeal of an alternative, non-combusted source of nicotine (e-cigarettes) will enhance the effectiveness of a reduced nicotine standard for cigarettes in smokers with OUD. Daily smokers receiving methadone or buprenorphine treatment will be recruited at University of Vermont and Johns Hopkins University and randomized to one of the following conditions: (1) normal nicotine content cigarettes (NNCC) alone, serving as the control condition, (2) VLNCCs alone, (3) VLNCCs + tobacco-flavored nicotinized e-cigarettes (TF e-cigs), or (4) VLNCCs + nicotinized e-cigarette with preferred flavoring (PF e-cigs). Participants will be asked to use only their assigned products for 16 weeks. Outcome measures include total CPD, product demand using behavioral-economic purchase tasks, craving, withdrawal, and biomarkers of tobacco toxicant exposure. In Week 17, participants will abstain from combusted cigarette use and we will assess effects on cigarette craving, withdrawal and demand.

This research will address the following specific aims:

**Aim 1 (Primary):** To compare the effects of: (1) NNCCs alone, (2) VLNCCs alone, (3) VLNCCs + TF e-cigs and (4) VLNCCs + PF e-cigs on total CPD in smokers with OUD. We hypothesize that at Week 16, total CPD will be reduced in a linear manner, with the largest reduction in the VLNCCs + PF e-cig condition.

**Aim 2 (Secondary):** To compare the effects of study conditions on measures of cigarette demand, smoke exposure (breath CO) and tobacco carcinogen biomarkers (NNAL, PAHs) in smokers with OUD. We hypothesize that at Week 16, these measures will have decreased in a linear manner, with the largest reduction in the VLNCCs + PF e-cig condition.

**Aim 3 (Exploratory):** To explore the effects of the four study conditions on cigarette demand,

2529 craving, and withdrawal in smokers with OUD during the abstinence assessment period.

2530 The integrative theme of this TCORS is vulnerable populations. The proposed research is relevant  
2531 to FDA CTP's scientific domains of Addiction and Behavior by addressing whether reducing the  
2532 nicotine content of cigarettes reduces cigarette use, dependence, and product appeal, and whether  
2533 these effects are enhanced by availability of appealing alternative sources of non-combusted  
2534 nicotine. It addresses the domain of Health Effects by assessing tobacco toxicant exposure and  
2535 other biomarkers. The proposed study is significant and innovative by modeling the potential  
2536 moderating effects of e-cigarette availability and appeal on a national reduced-nicotine policy for  
2537 cigarettes in this understudied population. Finally, it is programmatic as it builds directly upon and  
2538 extends the work our team accomplished during the Phase 1 funding period.

## 2539 2. SIGNIFICANCE

### 2540 2.1. Opioid Use Disorder (OUD) and smoking

2541 Cigarette smoking is the leading preventable cause of US morbidity and mortality.<sup>1</sup> While  
2542 smoking has steadily declined in the general population, it remains entrenched among vulnerable  
2543 populations. Individuals with substance use disorders, mental illness or socioeconomic  
2544 disadvantage are disproportionately represented among current cigarette smokers and bear a  
2545 disproportionate burden of smoking attributable disease and premature death.<sup>2-5</sup> The focus of this  
2546 proposal is on the vulnerable population of smokers with concurrent substance abuse. Recent data  
2547 from Wave 1 of the Population Assessment of Tobacco and Health study show that among current  
2548 adult cigarette smokers, 80.7% report past-year alcohol or drug use.<sup>6</sup> Current smokers are more  
2549 than twice as likely as non-smokers to report past-year misuse of painkillers/sedatives and more  
2550 than four times as likely to be past-year users of other drugs, including heroin. Conversely,  
2551 individuals with substance use disorders (SUDs) are substantially more likely to die of tobacco-  
2552 related disorders (e.g., lung and larynx cancers, respiratory disease) than the general population.<sup>7-9</sup>  
2553 They are also more likely to die of problems related to their tobacco use than other drug use.<sup>10</sup>

2554 As an exemplar of the larger population of smokers with SUDs, we have been focusing on  
2555 those with concomitant opioid use disorder (OUD). The disproportionate burden of smoking and  
2556 smoking-related consequences is especially evident in these individuals. **Prevalence of smoking  
2557 among adults with OUD is six-fold that of the general US adult population (84-94% vs. 15%,  
2558 respectively).**<sup>11-17</sup> Smokers with OUD also have greater severity of nicotine dependence. In recent  
2559 analyses by our group of data from the National Survey on Drug Use and Health (2006- 2014),  
2560 after accounting for sociodemographic and smoking characteristics, mean Nicotine Dependence  
2561 Syndrome Scale scores were significantly higher for opioid-dependent smokers vs. smokers not  
2562 dependent on opioids ( $p < 0.05$ ).<sup>18</sup> Finally, smoking is associated with significant morbidity and  
2563 mortality in this population, with the **mortality rate of opioid-dependent smokers four times that  
2564 of opioid-dependent nonsmokers.**<sup>7,9-10</sup>

2565 The majority of OUD patients report knowledge of the adverse health consequences of  
2566 smoking as well as a desire to quit smoking.<sup>12,16-17,19-23</sup> Despite this, their responses to standard  
2567 smoking cessation treatments, including standard pharmacotherapies, are notoriously poor, with  
2568 quit rates one-fourth that of non-substance abusers.<sup>16, 24-29</sup> Taken together, the high smoking  
2569 prevalence, poor treatment response, and public health costs associated with smoking among  
2570 opioid-dependent individuals are of significant concern given the scope of the current opioid  
2571 epidemic, with 5% of Americans - over 16 million people - reporting recent opioid abuse.<sup>30-31</sup>

### 2572 2.2. Reducing the addiction potential of tobacco products

2573 One potential way to reduce smoking prevalence is to implement public policy mandating a  
2574 reduction in cigarette nicotine content below the threshold necessary to establish and sustain  
2575 nicotine dependence.<sup>32</sup> The 2009 Family Smoking Prevention and Tobacco Control Act gave the  
2576 FDA the authority to regulate tobacco products to protect public health, including limiting the  
2577 nicotine content of cigarettes. Nicotine is the constituent in tobacco that drives repeated use,  
2578 dependence, and eventually the chronic diseases and premature death that result from chronic  
2579 smoke exposure. Thus, reductions in nicotine content may reduce smoking prevalence and related  
2580

disease by disrupting initiation of smoking by new users and increasing cessation rates among current smokers.<sup>33-34</sup> This approach could be particularly beneficial to subpopulations of smokers who have less success with currently available cessation treatments, such as people with OUD.<sup>35</sup> Our work during the current funding period, reviewed below, indicates that smokers with OUD respond to reductions in the nicotine content of cigarettes with reductions in cigarette demand and other measures of addiction potential, although to a lesser extent than the other vulnerable smoker populations we have been examining (i.e., economically disadvantaged women, individuals with affective disorders (AD)). We anticipate that a *combination* of tobacco market conditions will be necessary to produce a maximal effect on combusted smoking in this population. In particular, we hypothesize that (1) making alternative sources of non-combusted nicotine (i.e., electronic cigarettes; e-cigs) available and (2) doing so under conditions that optimize their appeal (i.e., preferred flavoring) may enhance the ability of a national policy to reduce nicotine standards to decrease cigarette smoking, dependence, and related adverse health outcomes among smokers with OUD.

### **2.3. Relevance of the project to the integrative theme and goals of the TCORS**

The integrative theme of our UVM TCORS is **vulnerable populations**, and our goals are to model the potential effects of tobacco product standards on product use in vulnerable populations, with the goal of reducing the risks of product use, dependence, and related adverse health outcomes. For the FDA to effectively execute its tobacco regulatory responsibilities, it must have sound scientific evidence on how product standards impact tobacco use in populations with high rates of tobacco dependence. Our goal is to provide the FDA with that evidence. This project is relevant to that goal because it will examine the effects of a reduced-nicotine standard for cigarettes, alone and combined with another FDA-regulated product (e-cigs) on measures of cigarette use, demand, dependence and tobacco toxicant exposure in this vulnerable population.

### **2.4. Relevance to the scientific domains and priorities of the FDA CTP**

The proposed research is highly relevant to the CTP's scientific domains of **Addiction** and **Behavior** because it will address whether reducing the nicotine content of cigarettes reduces cigarette use, dependence, and product appeal, and whether these effects are enhanced by the availability of appealing alternative sources of non-combusted nicotine. It will address the **Health Effects** domain by assessing the effects of these conditions on tobacco toxicant exposure and a respiratory biomarker.

### **2.5. How study outcomes will improve scientific knowledge related to the manufacture, distribution and marketing of tobacco products**

Outcomes will directly inform scientific knowledge concerning the manufacture of tobacco products by demonstrating whether a reduction in the maximum nicotine content of cigarettes to  $\leq 0.4$  mg nicotine/g tobacco would reduce smoking in this vulnerable population. The outcomes will also indicate whether continuing to allow the sale of e-cigs in characterizing flavors improves the efficacy of a reduced-nicotine standard for cigarettes on smoking reduction in this population.

## **3. RATIONALE**

### **3.1 Effects of nicotine reduction in smokers with OUD**

There is growing evidence to support the public health benefit of a nicotine reduction policy. Studies in the general smoker population have demonstrated that use of reduced nicotine content cigarettes decreases smoking rates, dependence and toxin exposure levels.<sup>33,36-46</sup> However, these studies were conducted with psychiatrically and socioeconomically stable, healthy smokers. While a national nicotine reduction policy may hold significant potential to reduce smoking prevalence and related adverse health outcomes, it is important to first understand whether vulnerable populations of smokers may respond differently than the general population.<sup>43,47</sup> This includes the possibility that these subgroups respond to reduced nicotine content cigarettes (RNCCs) with compensatory smoking, which could lead to increased carcinogen and other toxin exposure, failure to use RNCCs altogether, or transition to use of other products (e.g., cigars) which would undermine the merit of

2633 this regulatory strategy.<sup>48,49</sup>

2634 Research conducted by our UVM TCORS provides encouraging evidence that the beneficial  
2635 effects of very low nicotine content cigarettes (VLNCCs) may extend to populations that are highly  
2636 vulnerable to tobacco addiction and its associated adverse health consequences. During the  
2637 current funding period, we have been conducting two multi-site studies examining acute and  
2638 extended exposure to RNCCs on the addiction potential of smoking. The initial acute exposure  
2639 study consisted of three parallel, within-subject laboratory studies in economically disadvantaged  
2640 women of reproductive age (n=56), individuals with  
2641 OUD (n=60), and individuals with AD (n=53).<sup>50</sup>  
2642 Participants sampled NIDA-provided research  
2643 cigarettes varying in nicotine content (15.8, 2.4, 1.3,  
2644 0.4mg/g) under double-blind conditions, with the  
2645 highest dose representing nicotine content typical of  
2646 commercial cigarettes. Following brief abstinence,  
2647 participants completed 14 sessions comparing the  
2648 relative reinforcing effects of the 6 possible dose pairs  
2649 in concurrent choice procedures. We also assessed  
2650 demand for each cigarette dose using the Cigarette  
2651 Purchase Task (CPT), a behavioral economic task  
2652 that models hypothetical demand for cigarettes under  
2653 varying prices. Lastly, we compared cigarettes on  
2654 smoking topography and subjective effects.

2655 Results were collapsed across populations as  
2656 similarities outnumbered differences. In concurrent  
2657 choice testing, participants chose the higher over the  
2658 lower nicotine content cigarettes across each of the  
2659 six dose pairs when available at the same low price, providing strong evidence that reducing  
2660 nicotine content decreases the relative reinforcing effects (i.e., addiction potential) of smoking in a  
2661 graded dose-dependent manner (Figure 1, upper panel). Importantly in terms of  
2662 regulatory implications, we also demonstrated that the robust preference for the high 15.8  
2663 mg/g control dose over the 0.4 mg/g dose was reversed in all three populations by incrementing the  
2664 response effort required to obtain the high dose while keeping the low dose available at the same  
2665 low response requirement (lower panel). This suggests that product preference is conditional on  
2666 environmental context. Demand for cigarettes on the CPT task also decreased as an orderly  
2667 function of nicotine content consistent with the differences in relative reinforcing effects seen in the  
2668 concurrent choice task. Importantly, there was no evidence of compensatory smoking. This study  
2669 provided a compelling demonstration that RNCCs reduce the addiction potential of cigarettes in  
2670 populations highly vulnerable to tobacco addiction. It is worth noting, however, that we observed  
2671 greater overall cigarette demand across doses in smokers with OUD vs. the other vulnerable  
2672 populations examined in this study.

2673 Our second multi-site study is ongoing and on schedule to be completed as planned. The study  
2674 uses a three parallel-groups design to investigate the effects of 12-week exposure to RNCCs  
2675 (15.8, 2.4, and 0.4 mg/g).

2676 Preliminary results on  
2677 total cigarettes per day  
2678 (CPD) are shown in  
2679 Figure 2 for the  
2680 individuals that have  
2681 completed the study thus  
2682 far. Presented are results  
2683 for the 15.8 mg/g control  
2684 (i.e., usual brand  
2685 cigarette) dose and the  
2686 VLNCC 0.4 mg/g dose,

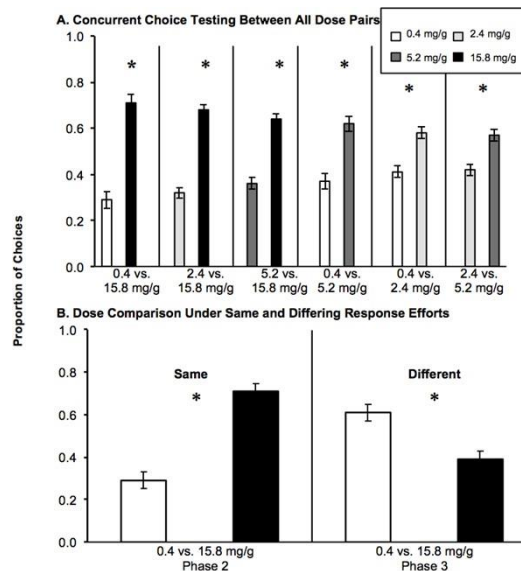

Figure 1. Concurrent Choice Testing

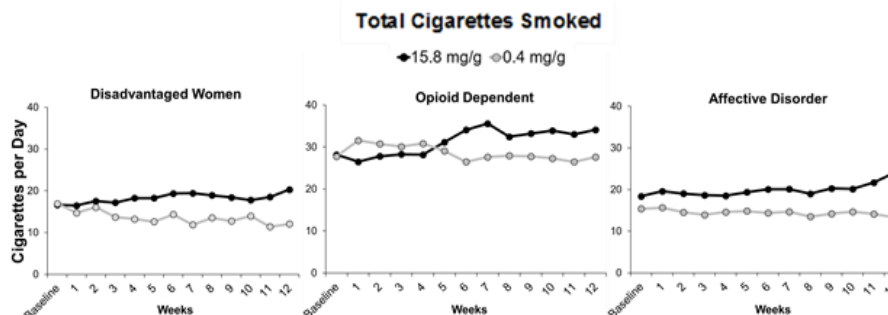

Figure 2. Total cigarettes smoked across 12-week period in three vulnerable populations.

2687 which has the lowest addiction potential. These also represent the two doses that we are proposing  
2688 to study in this renewal. Thus far, there is no evidence of sustained compensatory smoking in any  
2689 population receiving VLNCCs. CPD across the two doses separates over time in all three  
2690 vulnerable smoker groups; however, it does so later and overall consumption is greater among  
2691 smokers with OUD. Additionally, the current effect size for differences in CPD at 12 weeks among  
2692 the dis-advantaged women and smokers with AD (Cohen's  $d=0.70$  and  $0.81$ , respectively) are  
2693 larger than those seen in the opioid dependent population ( $d=0.38$ ) and consistent with those seen  
2694 at 6 weeks in the general population of smokers ( $0.79^{51}$ ). Fagerstrom dependence scores at 12  
2695 weeks are also significantly decreased among those assigned to VLNCCs vs. the  $15.8$  mg/g dose  
2696 in the disadvantaged women and those with AD but not in individuals with OUD. The overall greater  
2697 cigarette demand and consumption exhibited by smokers with OUD serves as an important  
2698 reminder of the especially persistent nature of smoking in this population.

### 2699 **3.2 Increasing appeal of alternative non-combusted nicotine sources**

2700 These data provide promising initial evidence that smokers with concomitant other  
2701 socioeconomic, substance use and psychiatric vulnerabilities will respond to RNCCs with  
2702 subsequent reductions in cigarette demand and other measures of addiction potential. However,  
2703 there is growing recognition of the critical importance of having appealing alternative non-  
2704 combusted nicotine sources readily available if the potential of a reduced nicotine standards policy  
2705 for combusted products is going to be realized. In the words of Benowitz and colleagues, "*The  
2706 RNCC and the emergence of non-combusted nicotine products like e-cigs should be viewed not as  
2707 alternatives but as complementary components of regulatory interventions that could virtually end  
2708 combusted tobacco use.*"<sup>52</sup> Further, the primary conclusion of the 2014 Surgeon General's Report  
2709 noted that "*the promotion of noncombustible tobacco products is much more likely to provide  
2710 public health benefits only in an environment where the appeal, accessibility, promotion, and use of  
2711 cigarettes and other combusted products are being rapidly reduced.*"<sup>51</sup> Our data also lead us to  
2712 anticipate that smokers with OUD and perhaps other SUDs may persist in smoking even if  
2713 cigarette nicotine content is reduced to very low levels. This further highlights the critical  
2714 importance of having non-combusted alternative sources of nicotine readily available at reinforcing  
2715 doses and in forms that enhance appeal. We know of only one report empirically examining how  
2716 the presence of non-combusted products influences use of VLNCCs and that was an exploratory  
2717 study of participants selected from the general smoker population.<sup>44</sup> In that study, when individuals  
2718 assigned to VLNCCs opted to also use a non-combusted product, they overwhelmingly chose e-  
2719 cigs over other non-combusted options (i.e., snus, NRT). This is consistent with other research  
2720 modeling the substitutability of non-combusted tobacco products for combusted cigarettes<sup>53</sup> and  
2721 serves as the rationale for us focusing on e-cigs in this renewal application.  
2722

### 2723 **3.3 E-cig use**

2724 E-cigs consist of a cartridge containing an e-liquid nicotine solution, propylene glycol (PG),  
2725 vegetable glycerin (VG), flavoring, and other additives, which are heated with an atomizer that  
2726 vaporizes the solution. First generation e-cigs resemble cigarettes and are disposable or  
2727 rechargeable. Second generation products (and the product used in this study) often resemble  
2728 pens and have refillable e-liquid reservoirs, while third generation devices have larger batteries,  
2729 adjustable power delivery and replacement heating coils and wicks.<sup>54</sup> Nicotine delivery from e- cigs  
2730 can be comparable to those from cigarettes, depending on e-cig characteristics, nicotine content  
2731 and user topography.<sup>55-58</sup> Toxin and carcinogen levels appear to be lower than those from cigarettes.  
2732 Hecht et al.<sup>59</sup> reported that former smokers who had switched to e-cigs had 59-99% lower levels of  
2733 6 tobacco toxicant and carcinogen metabolites than ongoing smokers, comparable to reductions  
2734 seen in smokers who had switched to nicotine lozenges.<sup>42</sup> Another study found that NNAL, a  
2735 metabolite of the tobacco carcinogen NNK, was reduced by 64% in smokers who had switched to  
2736 e-cigs for two weeks, as was chest tightness.<sup>60</sup> Initial data suggest that e-cigs may be a promising  
2737 tool for supporting transition away from combusted cigarettes in smokers with OUD.<sup>61- 64</sup> In a recent  
2738 observational study with methadone- and buprenorphine-maintained smokers, 99% were familiar  
2739 with e-cigs, 73% had ever tried them, and 34% were currently using e-cigs.<sup>65</sup> As in the general

2740 population, smokers with OUD reported that their reasons for e-cig use are primarily to quit or  
2741 reduce smoking.<sup>65</sup>  
2742

### 2743 **3.4 E-cig effects on smoking**

2744 E-cig use is associated with smoking reduction<sup>66-68</sup> and possibly quitting. In a trial using second  
2745 generation e-cigs, cigarette abstinence rates were 34% after 8 weeks and 21% 6 months later, with  
2746 an overall 60% reduction in CPD.<sup>69</sup> The only published study to our knowledge on the effects of e-  
2747 cigs in smokers with OUD was an uncontrolled, 6-week pilot study with 12 methadone- maintained  
2748 smokers. E-cig use was associated with significant reductions in self-reported combusted cigarette  
2749 use, few adverse effects, and excellent e-cig adherence (89%<sup>70</sup>). While e- cigs can reduce  
2750 cigarette craving and nicotine withdrawal,<sup>55,69,71-72</sup> these effects are generally determined by the  
2751 extent to which e-cigs are used by smokers; in turn, determinants of e-cig use include product  
2752 appeal and reinforcing effects.<sup>73</sup>  
2753

### 2754 **3.5 Importance of e-cig flavors**

2755 Over two-thirds of adult e-cig users use a flavored e-cig.<sup>5,74</sup> Flavors have been shown to  
2756 substantially enhance e-cig appeal and relative reinforcing effects<sup>75-76</sup> and have been cited as a  
2757 key feature affecting e-cig use among adults.<sup>5,77-78</sup> Experimental studies show that flavors increase  
2758 demand for e-cigs among cigarette smokers.<sup>79-80</sup> Studies of e-cig users also highlight that flavors  
2759 play an important role in their experience of the product as well as reducing cigarette consumption  
2760 and craving.<sup>81-84</sup> Importantly, there is a higher prevalence of flavored tobacco use among smokers  
2761 with SUDs relative to the general population.<sup>5,12,14</sup> A growing literature also suggests that opioid-  
2762 dependent individuals may be especially sensitive to flavors, as activation of the mu-opioid receptor  
2763 by opioid administration is associated with increased preference for sweet flavors.<sup>85-90</sup> These data  
2764 suggest that combining a non-combusted nicotine source with a preferred, likely sweet, flavor may  
2765 have substantial appeal and thus potential for reducing combusted cigarette use in OUD smokers.  
2766

### 2767 **3.6 Products to be tested**

#### 2768 Cigarettes to be assessed

2769 The cigarettes to be used in this study were made under an NIH contract with production being  
2770 overseen by the Research Triangle Institute (referred to as "Spectrum cigarettes"). NIH currently  
2771 has approximately 10 million of these cigarettes (of varying types) for research purposes. The  
2772 cigarettes selected for the study span the range of yields likely to produce the hypothesized  
2773 effects, as described above. Spectrum cigarettes are not currently commercially available,  
2774 although they are similar in many ways to marketed cigarettes (e.g., similar manufacturing, filter,  
2775 paper, etc.).  
2776

#### 2777 E-cigarettes to be assessed

2778 Both the JUUL and the Vuse Solo will be used and assessed in this study. . While JUUL will be  
2779 offered to all participants, participants that are unwilling to use JUUL will be offered the Vuse Solo. JUUL  
2780 is a commercially available closed system containing two components. One component contains a  
2781 lithium-ion battery (200 mAh), nichrome coil heater, silica wick, and stainless steel vapor path. The  
2782 other component is the prefilled e-liquid container that also serves as the mouthpiece. Each  
2783 commercially available cartridge holds approximately 0.7 mL of e-liquid containing approximately  
2784 40 mg of nicotine or 5% nicotine by weight (NBW). A lower dose containing approximately 23 mg  
2785 of nicotine per cartridge or 3% NBW is also marketed but will not be used in this study. All  
2786 containers contain glycerol, propylene glycol, natural oils, extracts and flavors, nicotine, benzoic  
2787 acid. We will not alter the e-liquid in any way. The research staff will distribute the e-liquid  
2788 containers as purchased from the manufacturer. The JUUL apparatus and 5% NBW e-liquids that  
2789 will be used are legally purchasable and have been as of August 8, 2016. We will not alter them in  
2790 any way.

2791 Vuse Solo is a commercially available closed system containing two components. The  
2792 power/heating device includes a 270 mAh battery, silica wick, microchips, and sensor. The other



2793 component is the prefilled e-liquid container. Each commercially available cartridge holds  
2794 approximately 1 mL of liquid containing 48 mg of nicotine or 4.8% NBW. All containers contain  
2795 vegetable glycerin, propylene glycol, reverse-osmosis water, glycerin, flavorings, and nicotine.  
2796 The research staff will distribute the e-liquid containers as purchased from the manufacturer. The  
2797 Vuse apparatus and e-liquid cartridges that will be used are legally purchasable and have been as  
2798 of August 8, 2016. We will not alter them in any way.

### 2799 3.7. Summary

2800 Although smoking rates have declined in the overall US population, there has been little to no  
2801 decline among people with OUD. A nicotine reduction strategy for combustible tobacco combined  
2802 with e-cig availability may have complementary effects on smoking reductions and consequent  
2803 tobacco-related health effects in this vulnerable population. This research is highly significant  
2804 because it will model how the availability of e-cigs impacts the effectiveness of a reduced-nicotine  
2805 policy for cigarettes in vulnerable smokers. It is responsive to the goals of the FDA in that the study  
2806 conditions are designed to model real-world scenarios of possible harm reduction policies in  
2807 populations that are vulnerable to smoking persistence.

## 2808 4. Project Study Methods

2809 This study will use a four-condition, parallel-groups research design. After a baseline period in  
2810 which daily smoking rate and other baseline assessments are completed, participants will be  
2811 randomly assigned to one of the following four conditions for a 16-week experimental period: (1)  
2812 normal nicotine content cigarettes (NNCCs, 15.8 mg/g) alone, which serves as the control  
2813 condition; (2) very low nicotine content cigarettes (VLNCCs, 0.4 mg/g) alone; (3) VLNCCs +  
2814 tobacco-flavored nicotine e-cigs (TF e-cig, 4.8 - 5.0% nicotine by weight, NBW, if they choose to  
2815 use the Vuse or JULL device, respectively); or (4) VLNCCs + preferred-flavor nicotine e-  
2816 cigarette (PF e-cig).  
2817  
2818

## 2819 5. Study Screening Procedures

### 2820 5.1 Participants

2821 Participants will be men and women, ages 21-70, who are currently receiving methadone or  
2822 buprenorphine maintenance for OUD. They must report smoking  $\geq 5$  cigs/day for the past year and  
2823 provide a breath CO  $\geq 8$ ppm or a positive urine cotinine value. They must be sufficiently literate to  
2824 complete research tasks, be in good physical health without serious illness or change in health in  
2825 the past 3 months, must not be daily e-cigarette users, and have the technological capabilities to  
2826 complete weekly face-to-face video assessments and the compatibility to use ico Smartphone  
2827 Smokerlyzers for assessing breath carbon monoxide (CO) levels.. As opioid and cocaine use can  
2828 directly increase smoking rates,<sup>91-96</sup> participants must be maintained on a stable methadone or  
2829 buprenorphine dose with no regular illicit-drug abuse ( $< 4$  positive specimens) for the past month.  
2830 Consent to confirm dose and drug abstinence with the participant's opioid clinic will be obtained at  
2831 intake, and we will monitor any changes in dose throughout the study. These practices have been  
2832 effective for confirming clinical stability in our prior smoking trials with opioid- maintained  
2833 patients.<sup>50,96-100</sup>  
2834

2835 We will exclude those  $< 21$  years old as users below that age have legal restrictions on ability to  
2836 purchase these products that can alter use patterns for reasons that do not apply to adult  
2837 populations. We will exclude pregnant and nursing women and women not reporting use of  
2838 contraceptives, anyone currently using nicotine replacement, bupropion or other  
2839 pharmacotherapies as cessation aids, those who report daily use of e-cigs in the past 30 days as  
2840 they may not be compliant with the study e-cigs, and anyone intending to quit within 3 months, as  
2841 participation in this study may not reduce smoking and could increase smoke and/or nicotine  
2842 exposure. Those who exclusively use roll-your-own cigarettes or used other non-cigarette tobacco  
2843 products (e.g., cigars, smokeless)  $\geq 10$  days in the last 30 are excluded as their use of these  
2844 products may reduce the validity of our main outcome measure, total CPD (which includes study  
2845 and non-study cigarettes). The following conditions are excluded as they could affect participants'

2846 abilities to complete the study: unstable medical or medication conditions (significant changes in a  
2847 serious medical condition in the past 3 months, medication changes in the past 4 weeks; details  
2848 provided in Protection of Human Subjects section), symptoms of psychosis or dementia, past-  
2849 month suicidality, current (past-6 months) alcohol or SUDs other than nicotine and the OUD for  
2850 which they are being treated, positive toxicology screen for illicit drugs (marijuana allowed; one re-  
2851 screen opportunity), positive breath alcohol level (BAL) at screen (one re-screen opportunity).  
2852 Participants who meet criteria and provide written informed consent will be enrolled into the trial.  
2853

## 2854 **5.2 Recruitment**

2855 This study will be conducted at the University of Vermont (UVM) in Burlington, VT (primary site)  
2856 and Johns Hopkins University (JHU) in Baltimore, MD. This collaboration will permit us to complete  
2857 this study expeditiously, enhance sample diversity, and facilitate meaningful collaboration across  
2858 multiple sites. Participants will be recruited through advertisements posted in local opioid treatment  
2859 clinics, in local newspapers, on community bulletin boards, Craigslist, Facebook and word of  
2860 mouth. Participants can choose to complete the pre-screening questionnaire online or by phone. At  
2861 UVM, individuals recruited from online sources will be directed to a UVM-hosted recruitment  
2862 website where they will have the opportunity to select which research studies interest them. They  
2863 will then be redirected to a brief online screener to assess eligibility. Those who contact us by  
2864 phone will be given a description of the study and asked questions to assess eligibility. The RA will  
2865 read a script briefly explaining the study. Participants will be informed that this is not a smoking  
2866 cessation program, and that smoking cessation services are available in the community  
2867 independent of their decision to participate in this study. If interested and eligible, participants will  
2868 be asked to present for a brief 10-minute in-person medical consent visit where research staff  
2869 obtain informed consent to contact participant's opioid treatment provider to confirm stability in  
2870 treatment. Participants will be asked to provide a urine sample for toxicology screening. If  
2871 interested and eligible following the medical consent visit, they will be invited to participate in the  
2872 first portion of the screening interview. Research assistants will inform eligible participants that the  
2873 screening will occur over video chat, and will assist the participant with setting up an appropriately  
2874 secure video platform.

2875 During this first portion of the screening, the participant will complete questionnaires through  
2876 REDCap online while the research assistant is present over video chat or phone to deliver  
2877 instructions and to answer any questions. The participant will then answer interviewer-  
2878 administered questionnaires over video chat. Participants who did not yet set up their video  
2879 platforms will do so with the research assistant before beginning any questionnaires. Participants  
2880 will be instructed to have picture identification (e.g. driver's license) available to show the staff. If  
2881 participants anticipate not having acceptable ID, staff should consult with the project coordinator or  
2882 study PI. Initial study eligibility will be determined after data are collected from this visit.  
2883 Participants who meet initial study eligibility will be scheduled for the second portion of the  
2884 screening.

2885 Before the second portion of the screening occurs, eligible participants will receive the  
2886 equipment necessary to use for collecting physiological measurements. Participants will be asked to  
2887 pick up this equipment via curbside pickup at our clinic (UVM University Health Center, UHC),  
2888 which will consist of participants calling staff once they arrive at UHC and staff coming out to give  
2889 participants a bag/box containing the following equipment: a Smokerlyzer; an audio jack adapter  
2890 for the Smokerlyzer if necessary; a blood pressure cuff; an oximeter; a thermometer; a urinary  
2891 cotinine dipstick; urine cups with attached temperature test strips; a pregnancy test strip (if  
2892 applicable) and urine toxicology test strips or a saliva toxicology test. Participants (and staff) will be  
2893 asked to use cloth face coverings when exchanging product. Participants may be invited to come  
2894 inside to pick up this equipment if the participant is asked to wait for this exchange. All participants  
2895 must pass a COVID19 screening before entering the building. If there is any waiting that needs to  
2896 occur inside the building, the participant will wait inside one of our five highly ventilated smoking  
2897 chambers. If there happens to be no space in the smoking chambers, the participant will be told  
2898 that they can not come up to the clinic until space is available. After each use, the all of the  
2899 surfaces in the smoking chambers will be cleaned with 70% or greater of alcohol solution by staff

2900 wearing a mask and gloves, as well as all of the door handles. If the participant uses the bathroom  
2901 while they are in the clinic, the bathroom surfaces and handles will be wiped down after use by staff  
2902 while masks and gloves are worn. Participants who are using the smoking chambers at any point in  
2903 the study to wait for product or equipment exchange will remain in the chambers until a staff  
2904 member comes to knock on the door to let them out. In this way, we can avoid people coming into  
2905 close contact with each other in the larger room that contains the smoking chambers. A minimum of  
2906 6 feet of distance will be maintained for all staff and participants at all times. For participants who  
2907 cannot come to the clinic, a commercial courier will deliver this equipment to them before the  
2908 second portion of the screening.

2909 If at any point the Smokerlyzers are not available for distribution, we will conduct the CO test  
2910 curbside before or after participants are invited inside and the courier service will not be available.  
2911 Research Assistants will bring down the CO monitor to the participant. While maintaining 10 feet of  
2912 distance and wearing gloves, staff will explain how the CO monitor works. Once the participant is  
2913 ready, staff will press the button to obtain the measurement and will set the CO monitor down and  
2914 will back away 10 feet. The participant will then come to pick up the device and will blow into the  
2915 monitor. After the participant completes the test, they will set down the monitor and back up 10 feet  
2916 and staff will retrieve the monitor. After every use, staff will wipe down the CO monitor with  
2917 disinfectant wipes and hydrogen peroxide wipes. When using the monitor, a D-piece (a portable  
2918 valve filter) must be placed into the monitor and then the single use plastic mouthpiece is placed into  
2919 the D-piece. The monitor has built in SteriTouch technology to ensure optimum infection control,  
2920 and the D-pieces filter out 99.9% of airborne bacteria and greater than 97% of viruses for excellent  
2921 infection control. Each participant will be assigned their own D-piece to use throughout the study,  
2922 and no D-piece will ever be shared among participants. Participants will gently exhale into the D-  
2923 piece for the breath carbon monoxide reading. Participants will be instructed only to exhale through  
2924 the device, not to inhale. D-piece technology also includes a one-way valve that prevents air from  
2925 being drawn back from the monitor. D-pieces will also be wiped down after each use with  
2926 disinfectant wipes and hydrogen peroxide wipes and stored in a container at the lab.

2927 Once participants have received the necessary equipment to complete the physiological portion  
2928 of the screening, the research assistant will initiate a video call with the participant. During this call,  
2929 the participant will be instructed on how to use the equipment and then will be asked to use the  
2930 equipment to obtain the following physiological readings: blood pressure, heart rate, oxygen  
2931 saturation, temperature, and breath CO levels. Participants will also be asked to collect a urine or  
2932 saliva sample during the visit. If a saliva sample is collected, the participant you will provide the  
2933 saliva sample over video chat while the staff observes. If a urine sample is collected, staff will ask  
2934 participant to bring this urine sample to the video screen after collection to perform a urine  
2935 toxicology test and a pregnancy test (if applicable). These urine cups will have temperature strips  
2936 affixed to ensure that the sample is valid. Participants who have a carbon monoxide level of less  
2937 than or equal to 8 will also be asked to use the urinary cotinine dipstick to determine whether they  
2938 are positive for cotinine. The participant will obtain the physiological readings and perform the tests  
2939 and then will hold the results of the test up to the camera so that the research assistant can  
2940 interpret and record the readings on REDCap, UVM participants will be primarily recruited from our  
2941 university opioid program, The Chittenden Center (CC). Dr. Sigmon is the Director of this clinic,  
2942 which currently has 1,000 methadone- or buprenorphine-maintained patients. A survey of CC  
2943 patients indicates that 88% currently smoke, which translates to approximately 880 smokers at our  
2944 on-site clinic alone. Recruitment will also draw from patients receiving treatment at the office-based  
2945 buprenorphine practices throughout the Burlington, VT community. JHU participants will be  
2946 recruited primarily from two clinics located directly on the JHU Bayview Medical Center Campus:  
2947 Addiction Treatment Services, a methadone clinic with 500 patients, and Comprehensive Care, a  
2948 primary care clinic with 300 patients receiving buprenorphine. Should these resources be  
2949 inadequate at any point in time, we will also recruit from two large community-based methadone  
2950 programs in Baltimore with whom Dr. Stitzer has an on-going relationship as a PI of the NIDA  
2951 Clinical Trials Network. Taken together, our access to opioid-maintained smokers is more than  
2952 adequate to fulfill the recruitment needs of this project. Power estimations were based on the 15%  
2953 dropout rate across populations in our current trials. Using an intent-to-treat approach, we require

2954 75 randomized in each condition (300 total) to test our primary aims.

2955 Participants will be also instructed to have handy a pack of their usual brand cigarettes, all  
2956 prescription medications they are currently taking and identification (example, driver's license)  
2957 during this second portion of the screening visit. If participants anticipate not having acceptable ID  
2958 site staff should consult with the project coordinator or study PI.

2959 A participant must complete his/her two-part screening session within 90 days of completing  
2960 the pre-screening questionnaire. If the participant is not able to complete the two-part screening  
2961 visit in that timeframe, he/she will need to complete the pre-screening questionnaire again.  
2962

### 2963 **5.3 Informed Consent Process:**

2964 Before beginning the informed consent process, potential participants will need to produce  
2965 identification as described above. The interviewer will confirm the age and identity of the  
2966 participant. If the participant is not between the ages of 21 and 70, he/she will be dismissed without  
2967 payment. During the first portion of the screening session, study information will be presented and  
2968 documentation of the participant's informed consent via electronic signature on REDCap will be  
2969 required prior to participating in the screening session. In order to ensure adequate informed  
2970 consent, participants will be asked to read the first several lines aloud (to determine literacy) and  
2971 will then be given ample time to read the consent document. If the interviewer suspects the  
2972 participant is not literate, he or she will have them continue reading further to confirm. Inability to  
2973 read and comprehend written study materials will result in ineligibility and the interviewer will inform  
2974 the participant that they are not eligible. Only after the participant and the researcher are fully  
2975 satisfied that the participant understands the purpose of the study, the confidentiality of the data,  
2976 the procedures, the risks/benefits and his/her rights as a research participant will the consent form  
2977 be signed and the participant undergo screening procedures.  
2978

### 2979 **5.4 Screening Measures**

2980 Those who consent will be screened for eligibility using the following measures:

2981 **The following physiological measures will be collected and entered directly into REDCap by**  
2982 **the interviewer:**

- 2984 1) Expired breath carbon monoxide (CO) levels will be assessed using a Smartphone Monitor  
2985 (Covita - for remote collection) or a Bedfont CO monitor (for curbside collection), a reliable  
2986 and valid measure of recent smoking.
  - 2987 a. Urinary cotinine test strips will be used to assess urinary cotinine levels if a  
2988 participant's CO reading is less than or equal to 8 ppm.
- 2989 2) A urine or saliva toxicological screen will be performed to assess the presence of illicit  
2990 drugs including up to the following drugs: marijuana, cocaine, opiates, oxycodone,  
2991 benzodiazepines, barbiturates, amphetamines, methadone, buprenorphine,  
2992 methamphetamines, MDMA and PCP. Participants who fail the drug screen for drugs  
2993 other than marijuana or their prescribed opioid medication may reschedule the interview  
2994 but will need to be re-consented to ensure they have received adequate informed consent.  
2995 They will be excluded if they are positive for drugs (other than marijuana or prescribed  
2996 medications as determined by PI on a case-by-case basis) the second time.
- 2997 3) Urine Pregnancy Test (HCG detection) will be performed for all participants.
- 2998 4) Blood pressure and heart rate will be measured using an automated blood pressure  
2999 monitor and a finger pulse oximeter to help the licensed medical professional determine  
3000 final participant eligibility. Participants will be told if their blood pressure is in an abnormal  
3001 range and advised to see a doctor by research staff. The research staff will also submit a  
3002 medical event form for the LMP to review along with a Blood Pressure and Heart Rate  
3003 Symptom Checklist form to ascertain details of the symptomatology for the LMP to review.  
3004 In severe cases, the LMP may also choose to call the participant to follow-up and/or  
3005 withdraw the participant from the study if necessary. All of these procedures are  
3006 documented in our Blood Pressure/Heart Rate Collection: Standard Operating Procedure  
3007 form which we can submit to the IRB if the Committee deems necessary.

- 3008 5) Body temperature, respiratory rate and oxygen saturation will be added as physiological  
3009 measures based on the CDC recommendations and those of Dr. David Kaminsky.  
3010 [https://www.cdc.gov/tobacco/basic\\_information/e-cigarettes/severe-lung-](https://www.cdc.gov/tobacco/basic_information/e-cigarettes/severe-lung-disease/healthcare-providers/index.html)  
3011 [disease/healthcare-providers/index.html](https://www.cdc.gov/tobacco/basic_information/e-cigarettes/severe-lung-disease/healthcare-providers/index.html)  
3012

3013 **The following screening assessment will be administered as an interview:**

- 3014 1) The Mini International Neuropsychiatric Interview (MINI) 7.0<sup>70</sup>  
3015

3016 **The following screening assessments will be administered as an interview and entered**  
3017 **directly into REDCap by the interviewer:**

- 3018 1) The MINI Plus Modules  
3019 2) The MINI suicide subscale<sup>104</sup> to evaluate suicide risk.  
3020 3) MINI Follow-up Questionnaire (if applicable)  
3021 4) Tobacco Use History and Exposure Questionnaire, which measures variables such as  
3022 smoking amount, cigarette brand, age of initiation of smoking, number of quit attempts,  
3023 duration of quit attempts and duration of smoking.  
3024 5) Smoking Cessation Therapy Use Questionnaire  
3025 6) Time Since Last Cigarette Questionnaire  
3026 7) Maintenance Drug Dose Questionnaire – Screening Version  
3027 8) Medical History Questionnaire to assess current diagnoses, symptoms and past health  
3028 problems.  
3029 a. Medications will be recorded directly onto the Concomitant Medications form in  
3030 REDCap.  
3031 9) Drug Abuse Screening Test (DAST-10), which assesses quantity and frequency of alcohol  
3032 and drug use (12 month and 1 month version)  
3033

3034 **The following screening assessments will be completed by the participant directly in**  
3035 **REDCap, except where noted otherwise:**

- 3036 1) Demographic History Questionnaire, which will assess age, gender, ethnicity, race,  
3037 education, income, marital status, and employment history.  
3038 2) Alcohol Use Questionnaire---based on the Alcohol Use Disorders Identification Test<sup>105</sup> (12  
3039 month and 1 month version)  
3040 3) Drug Use Questionnaire---based on the Drug Abuse Screening Test<sup>106</sup> (12 month and 1  
3041 month version)  
3042 4) Fagerström Test for Nicotine Dependence (FTND)<sup>107</sup>;  
3043 5) Wisconsin Inventory of Smoking Dependence Motives-Brief Scale (WISDM)<sup>108</sup> will be  
3044 administered to assess nicotine dependence severity.  
3045 6) Penn State Electronic Cigarette Dependence Index<sup>109</sup>;  
3046 7) Smoking Stages of Change Algorithm<sup>110</sup>;  
3047 8) Identifying Information Form will include the participant's REDCap Subject Identifier,  
3048 name, address (including the county of residence), email address, phone number, age,  
3049 date of birth, and social security number (if applicable).  
3050 a. This form will be entered into the 'Identifying Information Access Database'.  
3051 i. Each site will have a separate 'Identifying Information Access Database'.  
3052 ii. Identifying information will not be shared with other sites. Each site is  
3053 responsible for maintaining confidentiality of this information.  
3054 iii. Identifying information will be kept in a locked file cabinet (source  
3055 document) and in a password protected Access Database (electronic  
3056 version) separate from all other study data.  
3057 9) Beck Depression Inventory (BDI-II)<sup>68</sup>, to assess depressive symptoms.  
3058 (This form has been updated on 1.29.20 so as to use the BDI-II. The BDI-II will be used instead of the BDI so  
3059 that the data collected will be directly comparable to other projects using the BDI-II).  
3060 10) Overall Anxiety Severity and Impairment Scale<sup>69</sup>(OASIS); to assess frequency and  
3061 severity of anxiety symptoms.  
3062 11) COVID19 Symptom Questionnaire

3063 12) Respiratory Symptom Questionnaire will be administered to assess respiratory health  
3064

3065 In the event that the REDCap website is not functioning, the assessments will be administered  
3066 aloud and participant answers will be recorded securely. The interviewer will enter the data into  
3067 REDCap when it resumes functioning properly. This information should be recorded in the 'End of  
3068 Visit Evaluation Form'.  
3069

### 3070 **5.5 Suicidality/Mental Health Monitoring**

3071 Participants who endorse suicidal intention in the past month or a suicide attempt in the  
3072 past 6 months as indicated on the BDI (score > 1 on question 9) or MINI suicide subscale (endorse  
3073 question 4 and/or 5 on the MINI suicide subscale or question 6 on the MINI suicide subscale with  
3074 suicide attempt in the past 6 months) or answer "yes" to question A3g on the MINI  
3075 Neuropsychiatric interview and symptoms have occurred in the past two weeks will be assessed  
3076 by a clinician for eligibility and possible intervention. The research staff member will contact a  
3077 licensed clinician for evaluation. In the event that no clinician is available, staff will put the  
3078 participant in contact with the National Suicide Prevention Lifeline at 1-800-273-8255. They will  
3079 also contact the Study Coordinator and Site PI to inform them of the situation as soon as possible.  
3080 Additionally, they will contact the Project Coordinator to inform her of the situation. The participant  
3081 will be paid \$25 (+\$25 bonus if applicable) and provided with local mental health resources. Post  
3082 enrollment, any report of suicidal ideation or attempt by a participant will be grounds for immediate  
3083 withdrawal from the study.  
3084

### 3085 **5.6 Inclusion/Exclusion Criteria**

#### 3086 Inclusion Criteria:

- 3087 6) Men and women ages 21-70, who are currently receiving methadone or buprenorphine  
3088 maintenance treatment for opioid dependence;  
3089 7) Report smoking  $\geq 5$  cigarettes per day for the past year;  
3090 8) Provide an intake breath CO sample  $>8$  ppm, (if  $\leq 8$  ppm, then urinary-cotinine strip must be  
3091 positive);  
3092 9) Be without current (within the past year) serious mental disorder that would interfere with  
3093 study results of completion as determined by the licensed medical professional or PI,  
3094 10) Be sufficiently literate to complete the research-related tasks;  
3095 11) Be in good physical health without serious illness or change in health or medication (not  
3096 including methadone or buprenorphine dose) in the past three months as determined by the  
3097 licensed medical professional at each site;  
3098 12) Participants must be maintained on a stable methadone or buprenorphine dose for the past  
3099 month, with no evidence of regular illicit-drug abuse ( $<30\%$  positive specimens in the past  
3100 30 days).  
3101 a. Consent to confirm dose and drug abstinence with the participant's opioid clinic will  
3102 be obtained prior to screening at a medical consent visit and we will monitor any  
3103 changes in dose throughout the study.  
3104 b. Participants must provide proof of at least three biochemical (e.g. urine, saliva)  
3105 samples within the last 30 days of the date of the medical consent visit that have  
3106 no evidence of illicit drug use. If they do not have three, they will be asked to  
3107 provide additional samples as needed and coordinated by research staff to confirm  
3108 clinical stability. They may provide up to two samples per week with at least one  
3109 full day between samples.  
3110 13) Have appropriate equipment to complete face-to-face video assessments and use ico  
3111 Smartphone Smokerlyzer Monitors. For those who do not have a Smartphone, staff will  
3112 explore potential alternate plans (e.g., project-provided inexpensive Android phone)  
3113

#### 3114 Exclusion Criteria:

- 3115 1) Exclusive use of roll-your-own cigarettes;

- 3116 2) Planning to quit smoking in the next 30 days;
- 3117 3) A quit attempt in the past 30 days resulting in greater than 3 days of abstinence;
- 3118 4) Significant use of other tobacco or nicotine products within the past month (more than 9
- 3119 days in the past 30).
- 3120 5) Currently taking anticonvulsant medications including:
- 3121 a. Phenytoin [Brand Name: Dilantin]
- 3122 b. Carbamazepine [Brand Name: Tegretol, Carbatrol, Equetro, Eptol]
- 3123 c. Oxcarbazepine [Brand Name: Trileptal]
- 3124 d. Primidone [Brand Name: Mysoline]
- 3125 e. Phenobarbital
- 3126 6) Positive toxicology screen for any of the following drugs: cocaine, opiates, methadone,
- 3127 oxycodone, buprenorphine, benzodiazepines, barbiturates, amphetamines,
- 3128 methamphetamines, MDMA and PCP will be grounds for exclusion.
- 3129 a. Marijuana will be tested for but will not be an exclusionary criterion. Participants will
- 3130 be discouraged from smoking marijuana during the study.
- 3131 b. Participants with valid prescriptions for opiates, benzodiazepines, barbiturates, or
- 3132 amphetamines will not necessarily be excluded.
- 3133 c. Participants failing the toxicology screen will be allowed to re-screen once. These
- 3134 participants will need to be re-consented before being rescreened to ensure they
- 3135 have received adequate informed consent.
- 3136 7) Not currently enrolled in a treatment program for opioid dependence and/or not currently
- 3137 stable on their methadone or buprenorphine dose,
- 3138 8) Self-report of binge drinking alcohol (more than 9 days in the past 30 days, 4/5 drinks in a 2
- 3139 hour period in females/males);
- 3140 9) Systolic blood pressure < 90 or ≥ 160 mmHg;
- 3141 a. Participants failing for blood pressure will be allowed to re-screen once.
- 3142 10) Diastolic blood pressure < 50 or ≥ 100 mmHg;
- 3143 a. Participants failing for blood pressure will be allowed to re-screen once.
- 3144 11) Breath CO > 80 ppm;
- 3145 12) Heart rate is greater than or equal to 115 bpm or less than 45 bpm;
- 3146 a. Participants failing for heart rate will be allowed to re-screen once.
- 3147 13) Currently seeking treatment for smoking cessation;
- 3148 14) Being pregnant or nursing, or not report using an approved form of birth control if
- 3149 applicable determined by the Project Medical Director.
- 3150 15) Have used nicotine replacement, bupropion or other pharmacotherapies as cessation aids in
- 3151 the past month (bupropion will be allowed for treatment of depression);
- 3152 16) Current symptoms of psychosis, dementia or mania;
- 3153 17) Suicidal ideation in the past month (score > 1 on the BDI question 9 or endorse question 4
- 3154 and/or 5 on the MINI suicide subscale);
- 3155 18) Reporting a plan or attempt to commit suicide, which is assessed on question A3g of the
- 3156 MINI Neuropsychiatric Interview Major Depressive Episode Module. Thoughts of suicide
- 3157 without an intent or plan is not an exclusion criteria;
- 3158 19) Suicide attempt in the past 6 months (endorse question 6 on the MINI suicide subscale with
- 3159 suicide attempt in the past 6 months);
- 3160 20) Participation in another research study in the past 30 days;
- 3161 21) Daily use of e-cigarettes in the past month (defined as 6 – 7 days per week); or
- 3162 22) Co-habitation with any research participant who has or is participating in the current study.
- 3163 23) Oxygen saturation of < 90%
- 3164 24) Reporting positive symptoms for COVID19
- 3165

3166 Individuals under age 21 are excluded because they cannot legally buy cigarettes. Those

3167 with unstable medical, psychiatric, or medication conditions (as determined by the licensed

3168 medical professional) are excluded as these symptoms could affect a participant's ability to

3169 complete the study. Examples include but are not limited to the following: angina, stroke, heart  
3170 attack which occurred since phone screening, blood clots in the arms or legs for which the  
3171 individual is undergoing active medical treatment, cancer requiring active chemotherapy or  
3172 radiation therapy, severe shortness of breath caused by conditions such as uncontrolled  
3173 asthma, COPD, or arrhythmia, active untreated infection such as pneumonia, active untreated  
3174 endocrine disorder such as hyperthyroidism. We will exclude those currently seeking smoking  
3175 treatment and those who plan to quit in the next 30 days, as participation in this study may not  
3176 lead to reductions in smoking. We will exclude pregnant or nursing women and women of  
3177 reproductive potential who are unwilling to use acceptable forms of birth control throughout the  
3178 study if applicable determined by the Project Medical Director. We will also exclude anyone with  
3179 current or recent alcohol or drug abuse problems as these factors could independently affect  
3180 smoking behavior during the study. Individuals with baseline CO readings greater than 80 ppm,  
3181 those with heart rate or blood pressure readings that are out of range (systolic: 90-159 mmHg;  
3182 diastolic: 50-99 mmHg; HR: 45- 114 bpm) and anyone who has attempted suicide in the past six  
3183 months will be excluded from the study for safety concerns. Individuals who smoke 'roll your  
3184 own' cigarettes exclusively will be excluded from the study because we will be unable to  
3185 standardize their baseline smoking behavior. Individuals who have reported daily use of e-  
3186 cigarettes in the past 30 days will be excluded as they may not be compliant with experimenter-  
3187 provided e-cigarettes. Individuals who have recently participated in a research study will be  
3188 excluded as participation may have changed their smoking patterns, which may preclude a  
3189 stable smoking baseline. Because participants are required to complete portions of the protocol  
3190 independently, they will need to be able to independently read and comprehend the study  
3191 materials.  
3192

### 3193 **5.7 Eligibility Determination:**

3194 The research assistant will review the entire screening assessment battery for initial  
3195 eligibility determination, confirming the participant meets the above described  
3196 inclusion/exclusion criteria. All eligibility criteria that are not related to physiological  
3197 measurements will be assessed during the first portion of the screening visit, and all criteria  
3198 related to physiological measurements will be determined during the second portion of the  
3199 screening. The final eligibility of the participant will be determined by a licensed medical  
3200 professional (MD, DO, NP, PA, Master's prepared RN or CRN) at each site after reviewing the  
3201 Medical History Questionnaire, BDI, Mini Neuropsychiatric Interview, and the MINI suicide  
3202 subscale. The licensed medical professional may meet with a participant if available and think it  
3203 necessary for eligibility determination. He/she will sign off on eligibility prior to the first baseline  
3204 visit. If the licensed medical professional determines the participant is not medically eligible to  
3205 participate in the study, has current symptomatology that would interfere with interpretation of  
3206 the data, or is unlikely to complete the study he/she will inform the research assistants who will  
3207 contact the participant prior to the first baseline visit. The licensed medical professional will not  
3208 need to review the medical history forms of participants who are ineligible for other, non-medical  
3209 reasons.

3210 If a participant fails the urine or saliva toxicology screen due to a prescription medication  
3211 he/she is taking, then he/she will not be automatically excluded. The interviewer will make note  
3212 of this when he/she submits the forms to the licensed medical professional for final eligibility  
3213 determination.

3214 Once all the screening procedures have been completed, researchers will pay  
3215 participants \$25 (+\$25 bonus if applicable) for their time as long as they pass the drug tests and  
3216 meet the minimum requirements for carbon monoxide or urinary cotinine levels. Participants will  
3217 be paid after the completion of the study visit. If participants are deemed ineligible at any point  
3218 in the screening, the participant will be paid after determined ineligible. Marijuana will be tested  
3219 for but will not be an exclusionary criterion. If a participant does not pass the drug test but has a  
3220 current, valid prescription that would explain the failed test he/she will not be automatically  
3221 excluded and will still receive the visit payment. Participants who meet all other eligibility criteria,  
3222 sans the medical criteria, will be scheduled for the first baseline visit.



3223 At the end of the screening session, the researcher will complete the End of Visit  
3224 Evaluation Form. This will allow the researcher to make note of any problems encountered  
3225 during the visit and to assess the truthfulness of the participant in regards to self-report of  
3226 tobacco use.  
3227

## 3228 **6. Study Baseline Procedures**

3229  
3230 This study will use a one-week, two-session baseline period to collect baseline individual  
3231 difference measures and monitor daily usual-brand smoking behavior. At Baseline 1 or within 1  
3232 business day of the Baseline 1 visit, participants will be provided their usual brand cigarettes to  
3233 smoke, equivalent to 150% of their daily smoking rate. Participants will be encouraged to come to  
3234 the lab to pick up their usual brand cigarettes after they complete the questionnaires and physio  
3235 for the BL1 visit. Those who cannot come to the lab will receive product via a commercial courier.  
3236 A time line follow back (TLFB) will be used during the period between Baseline 1 and Baseline 2  
3237 to assess the daily cigarette use for the first 7 days the participant has product. The participant  
3238 must have received their UB cigarettes from the lab before the 7-day assessment period starts,  
3239 and Baseline 2 must occur at least 7 days after the participant receives their usual brand  
3240 cigarettes from the lab. If the baseline period extends past seven days and if the participant has  
3241 run out of product, participants will need to purchase their own usual brand cigarettes. Use of a  
3242 two session baseline period will ensure stability of daily smoking reports, reduce reactivity to the  
3243 daily cigarette monitoring, and reduce participant burden. During the two baseline sessions,  
3244 participants will complete subjective questionnaires. Each visit will last approximately two to four  
3245 hours. At the end of each baseline session, the researcher will complete the End of Visit  
3246 Evaluation Form This will allow the researcher to make note of any problems encountered during  
3247 the visit and to assess the truthfulness of the participant in regards to self-report of tobacco use.  
3248 Participants will also be supplied with saliva test equipment and urine collection equipment during  
3249 the Baseline 1 product exchange so that they can collect saliva and first void urine samples  
3250 during the Baseline 2 visit.

3251 For the Baseline 1 visit and all subsequent visits, the participant will be sent a REDCap  
3252 link within 15 minutes of the start of the scheduled visit to complete all of the non-interviewer  
3253 administered questionnaires. The participant will complete these questionnaires on their own but  
3254 can have the research assistant present on a video call if they desire. Before beginning the  
3255 physiological assessment portion of the visit over video call, the research assistant must review  
3256 the participant's questionnaire responses for that visit. Participants will be compensated after the  
3257 completion of the study visit and when the participant has received their new product.

3258 At Baseline 2 and all subsequent visits, after the participant has answered the  
3259 questionnaires and has completed the physiological portion of the visit over video call,  
3260 participants will be asked to come to the lab for a curbside exchange of product and biological  
3261 samples. Participants will bring in their used and unused product from the previous visit as well  
3262 as a first-void urine sample for assessing tobacco-related toxin exposure and a salivary sample  
3263 for assessing nicotine metabolism rate on applicable visits (BL2, Week 8 and Week 16) using  
3264 equipment that was provided at the previous visit. Participants will be instructed to call the RA  
3265 at the office when they get to the clinic to ensure that there is enough space in the smoking  
3266 chambers to house all participants while abiding by safety guidelines as detailed on page 14 of  
3267 the protocol. All participants must pass a COVID19 screening before entering the building. When  
3268 invited into the lab, the participant will be shown to a smoking chamber and will instructed to  
3269 place their bag of product outside of the chamber. The participant will wait here while the RA  
3270 processes and returns product through the randomization database. Then the RA will dispense  
3271 new product and bring the bag back to the participant. When the RA deems it safe for the  
3272 participant to exit the chamber, the RA will instruct the participant that they can leave. The RA will  
3273 instruct the participant to observe social distancing measures during this exchange, providing  
3274 clarification if necessary. If a participant forgets their first-void urine sample at the Baseline 2  
3275 visit, staff will ask participant to come back to the clinic with their first void urine sample before  
3276 exchange of product occurs. If participant is unable to return to the clinic with their first void

3277 sample, staff can arrange to meet the participant off campus to pick up their urine sample and to  
3278 give participant their study product. Distancing and safety measures as described above must be  
3279 observed. For participants who cannot make it to UHC, special arrangements will be made to  
3280 enable use of the randomization database and product return/distribution procedures to the  
3281 extent possible. Each week, during - or scheduled as nearly as possible to – a virtual visit, a  
3282 complete accounting of the participant's product inventory will be taken and processed remotely  
3283 through the randomization database. The participant will separate product based on its type (e-  
3284 cigarette or combustible inventory) and status (used/unused), and the RA will process return  
3285 characteristics through the database accordingly. The RA will clarify barcode characteristics with  
3286 the participant when legibility is compromised. The participant will be instructed to keep unused  
3287 product in their possession, but to exchange any used product with the courier who will deliver  
3288 newly dispensed replacement products within 48 hours.

3289 Product that will be given to participants for the Baseline 2 visit cannot be given/sent to  
3290 participants until 7 days have passed following completion of the Baseline 1 visit. We will need to  
3291 calculate baseline smoking rate during this 7-day period and so participants cannot have access  
3292 to any blinded study product or e-cigarettes before this 7-day period has ended.

### 3294 **6.1 Visit scheduling requirements for baseline period:**

3295 Participants will be required to schedule the Baseline 1 visit within 30 days of the completion  
3296 of their screening visit. If a participant still wants to be in the study after 30 days, he/she will need  
3297 to be re-screened. The participant will need to be re-consented but will maintain the original  
3298 REDCap Subject Identifier. The ideal target window separating Baseline 1 and Baseline 2 is  
3299 between 7 and 12 days. The minimum is 7 days and the maximum is 21 days. If the participant  
3300 does not complete the visit within 21 days, then he/she will not be rescheduled and will be  
3301 discontinued from the study.

### 3302 **6.2 Measures/Assessments**

3303 **The following physiological measures will be collected and recorded directly into REDCap**  
3304 **by the interviewer:**

- 3305 1) CO
- 3306 2) Blood Pressure
- 3307 3) Heart Rate
- 3308 4) Body temperature
- 3309 5) Oxygen saturation
- 3310 6) Respiratory rate
- 3311 7) Urine or Saliva Toxicology
- 3312 8) Urine Pregnancy test (if applicable, to be performed every 2 weeks)

3313 **The following assessments will be administered as an interview at Baseline 1 and entered**  
3314 **into REDCap by the interviewer at the end of the visit:**

- 3315 1) Concomitant Medications Form
- 3316 2) Health Changes Questionnaire, which will assess any weekly health changes,
- 3317 3) Time Since Last Cigarette Questionnaire
- 3318 4) Maintenance Drug Dose Questionnaire

3319

3320 **The following Baseline 1 assessments will be completed by the participant directly in**  
3321 **REDCap:**

- 3322 1) BDI
- 3323 2) OASIS
- 3324 3) Respiratory Symptom Questionnaire
- 3325 4) COVID19 Symptom Questionnaire
- 3326 5) Wisconsin Inventory of Smoking Dependence Motives-Brief Scale (WISDM) will be

- 3327 administered to assess nicotine dependence severity.
- 3328 6) Perceived Health Risks Rating<sup>112</sup>, a measure of the perceived addictive potential and  
 3329 other health risks associated with cigarettes;
- 3330 7) Perceived Stress Scale (PSS)<sup>112</sup>, assessing the degree to which life situations are  
 3331 perceived as stressful;
- 3332 8) Positive and Negative Affect Scales (PANAS)<sup>113</sup>, a measure of changes in positive and  
 3333 negative mood;
- 3334 9) Respiratory Health Questionnaire, a UVM measure of cough, shortness of breath and  
 3335 other respiratory symptoms;
- 3336 10) Minnesota Nicotine Withdrawal Scale (MNWS)<sup>114</sup>, a measure of nicotine withdrawal;
- 3337 11) Questionnaire of Smoking Urges-brief scale - Usual Cigarette (QSU)<sup>115</sup>, which measures  
 3338 the urge to smoke;
- 3339 12) Vaping Craving Questionnaire (VCQ)<sup>116</sup> which measures the urge to vape;
- 3340 13) Cigarette Evaluation Scale – Usual Cigarette (CES)<sup>117</sup>, which measures responses to  
 3341 cigarettes (e.g., reward, satisfaction);
- 3342 14) Vaping Evaluation Scale (VES), which measures responses to vaping (e.g. reward,  
 3343 satisfaction)
- 3344 15) Cigarette Purchase Task – Usual Brand Version (CPT)<sup>118</sup>, a self-report analogue of a  
 3345 progressive-ratio schedule that measures the relative reinforcing efficacy of cigarettes by  
 3346 querying how many of that day's cigarette they would consume in a day at varying prices.  
 3347 This task will indicate whether prolonged VLNC cigarette use reduces cigarette demand  
 3348 and increases sensitivity to increases in cigarette costs;

3349

3350 All participants will also be asked to select their top three flavors of e-cigarette liquid from a list  
 3351 read to them by the RA. This question will be asked in preparation for giving flavored pods to  
 3352 participants who are randomized into the flavored e-cigarette condition. This information will be  
 3353 recorded directly into REDCap. Participants will be asked to rate these top three flavors  
 3354 based on either previous experience with these flavors or to indicate how much they believe that  
 3355 they will like or dislike the flavors.

3356 **Physiological measures will be collected at Baseline 2 and entered directly into REDCap**  
 3357 **by the interviewer:**

- 3358 1) CO
- 3359 2) Blood Pressure
- 3360 3) Heart Rate
- 3361 4) Body temperature
- 3362 5) Oxygen saturation
- 3363 6) Respiratory rate
- 3364 7) Urine or Saliva Toxicology
- 3365 8) Urine Pregnancy (if applicable, to be performed every 2 weeks)

3366 **The following assessments will be administered as an interview at Baseline 2 and entered**  
 3367 **directly into REDCap by the interviewer:**

- 3368 1) Concomitant Medications Form
- 3369 2) Health Changes Questionnaire
- 3370 3) Time Since Last Cigarette Questionnaire
- 3371 4) Maintenance Drug Dose Questionnaire
- 3372

3373 **The following assessments will be administered at Baseline 2 and completed by the**  
 3374 **participant directly in REDCap:**

- 3375 1) BDI
- 3376 2) OASIS

- 3377 3) COVID19 Symptom Questionnaire  
3378 4) Respiratory Symptom Questionnaire  
3379 5) MNWS  
3380 6) WISDM  
3381 7) PANAS  
3382 8) QSU (usual brand)  
3383 9) Vaping Craving Questionnaire  
3384 10) CES (usual brand)  
3385 11) Vaping Evaluation Scale  
3386 12) CPT (usual brand)  
3387 13) E-Cigarette Flavor Rating Questionnaire  
3388 a. Participants will rate only the flavors that they received from staff for this visit  
3389

3390 In the event that the REDCap website is not functioning, the assessments will be administered  
3391 aloud and participant answers will be recorded securely. The interviewer will enter the data into  
3392 REDCap when it resumes functioning properly. This information should be recorded in the 'End of  
3393 Visit Evaluation Form'.

### 3394 **6.3 E-cigarette Training Session (Baseline 2):**

3395 Participants assigned to an e-cig condition will be told that they will be provided with a JUUL.  
3396 If a participant indicates an unwillingness to use the JUUL device, the research assistants will  
3397 offer the participant the Vuse Solo as alternative device. If the participants does not wish to use  
3398 either device, he or she would be ineligible for the study.

3399 Participants in the e-cigarette conditions will be given e-cigarette pods BEFORE the training  
3400 session occurs. These pods will be either picked up at the lab (preferred) or delivered to the  
3401 participant 1 to 2 days before their Baseline 2 visit occurs. Participants randomized to the e-  
3402 cigarette conditions will be notified before their Baseline 2 visit (but after the 7-day period  
3403 following Baseline 1) and informed of their e-cigarette condition. Participants randomized to the  
3404 flavored condition will be given pods of up to three flavors of their choice. Staff will calculate how  
3405 many total pods participants will be given at this time based on their smoking rate, and  
3406 participants will be able to choose the proportion of each flavor that they would like to receive.

3407 The e-cigarette training session will occur over video chat after the physiological  
3408 measurements have been collected. The first 30 minutes of the training session will consist the  
3409 participant being taught how to use, charge, and replace pods. Participants will first try their  
3410 JUUL using the tobacco flavor. At this point, participants who are in the tobacco-only flavor  
3411 condition will conclude their training session.

3412 For all visits following Baseline 2, participants in the preferred flavor condition, participants  
3413 are permitted to take up to three flavors home per week, but can choose to take less than three  
3414 flavors if desired. Participants will take home their chosen pods or cartridges of up to three  
3415 flavors. Participants will be able to change their flavors at only one point in the study if they  
3416 desire. Participants will only be allowed to take home three flavors at one time. Participants will  
3417 be given an E-cigarette instructional manual that reviews the e-cigarette training done at this  
3418 visit. Participants will be encouraged to call with any device issues.  
3419

### 3420 **6.4. Interactive Voice Response System:**

3421 At the end of the first baseline visit, participants will be trained to use the Interactive Voice  
3422 Response (IVR) System, which will contact participants each day throughout the study and ask  
3423 about their smoking behavior as well as withdrawal symptoms the week before and after Baseline  
3424 2. We will also review the IVR adherence incentive program, which consists of \$1 per call plus a  
3425 \$10 bonus for seven consecutive calls.

3426 The IVR system is operated by TeleSage (<https://telesage.com/about/>). To be enrolled in the  
3427 IVR system, research staff will enter the participant's initials, telephone number, subject identifier,  
3428 and visit dates into the IVR TCORS website. Identifying information (initials and telephone  
3429 numbers) will not be extracted as part of the data by the bioinformatics group. Please refer to  
3430 TeleSage's privacy statement and HIPAA compliance form for additional information.

3431

3432 **Baseline 2 biological specimens:**

3433 1) Urine sample for smoking biomarker assessment:

3434 Participants will be asked to provide a urine sample (first void of the day) at the second  
3435 baseline session and to post-randomization weeks 8 and 16 for biomarker assessment.  
3436 Biomarker analysis will provide nicotine and carcinogen exposure outcome measures and  
3437 verify compliance with VLNC cigarettes. Samples will be stored at -80C. Urine samples  
3438 will be analyzed for total nicotine (cotinine plus its glucuronide conjugate, a useful measure  
3439 of daily nicotine exposure), the tobacco-specific nitrosamine 4-methylnitrosamineo-1-(3-  
3440 pyridyl)-1-butanol (NNAL), and metabolites of 4 polycyclic aromatic hydrocarbons (PAHs),  
3441 which are biomarkers of tobacco smoke carcinogens and decrease upon tobacco  
3442 cessation or reduction. Anatabine is a minor alkaloid that is reduced in users of VLNC  
3443 cigarettes and e-cigs. Therefore, anatabine levels in samples from those assigned to the  
3444 VLNCC, VLNCC+TF e-cig and VLNCC+PF e-cig conditions should be lower than levels  
3445 from those in the NNCC condition. These analyses will be preformed by the Murphy lab at  
3446 the University of Minnesota.

3447 2) Saliva Samples for smoking biomarker assessment:

3448 We will collect a saliva sample at the second baseline session and post-randomization  
3449 weeks 8 and 16 for analysis of nicotine metabolite ratio (NMR; ratio of 3-hydroxycotinine  
3450 [3 HC] to cotinine [COT]), a phenotypic marker of nicotine metabolic rate. Analyses of  
3451 these samples will be performed by the Tyndale lab.

3452 **Biomarker shipping and storage:**

3453 Biomarkers will be shipped quarterly to the University of Vermont Laboratory for Clinical  
3454 Biochemistry Research (Tracy Lab). The Tracy Lab will serve as a central repository for all  
3455 biomarker specimens and will be responsible for distributing specimens to the appropriate labs  
3456 on a quarterly basis. Urine samples will be analyzed and stored at the University of Minnesota  
3457 Murphy Lab. The saliva samples will be analyzed and stored at the University of Toronto Tyndale  
3458 Lab.  
3459

3460

**7. Study Experimental Procedures**

3461 **7.1. Experimental Period:**

3462 Participants will be seen weekly throughout the 16-week experimental period. Weeks 4, 8, 12,  
3463 16 and the abstinence visit will take approximately 2-4 hours each. All other sessions will last  
3464 approximately 2 hours. If a participant has a positive urine or saliva toxicology test or is visibly  
3465 intoxicated as determined by slurred speech, swaying, or stumbling, the session will be  
3466 rescheduled until a negative test result is obtained and intoxication is not present. As a part of  
3467 each experimental visit, participants will be asked to come to UHC for a product exchange. All  
3468 participants must pass a COVID19 screening before entering the building. Participants will be  
3469 instructed to contact the RA at the office when they get to the clinic to ensure that there is enough  
3470 space in the smoking chambers to house all participants while abiding by safety guidelines as  
3471 detailed on page 14 of the protocol. All participants must pass a COVID19 screening before  
3472 entering the building. When invited into the lab, the participant will be shown to a smoking  
3473 chamber and will instructed to place their bag of product outside of the chamber. The participant  
3474 will wait here while the RA processes and returns product through the randomization database.  
3475 Then the RA will dispense new product and bring the bag back to the participant's smoking  
3476 chamber and leave it on the ground in front of the chamber. When the RA deems it safe for the  
3477 participant to exit the chamber, the RA will instruct the participant that they can leave. The RA will  
3478 instruct the participant to observe social distancing measures during this exchange, providing  
3479 clarification if necessary. At the end of each experimental session, the researcher will complete  
3480 the End of Visit Evaluation Form, which will be filed in the participant's binder. This will allow the  
3481 researcher to make note of any problems encountered during the visit and to assess the  
3482 truthfulness of the participant in regards to self-report of tobacco use and compliance to study  
3483 procedures.

3484

3485 **Visit scheduling requirements for experimental period:**

3486 The ideal scheduling window between each visit is 7 days based on the date of the Baseline  
3487 2 Visit. For additional scheduling requirements, refer to the '*Scheduling Visits SOP*'. If a participant  
3488 misses a visit and is unable to reschedule during the window ( $\pm 3$  days), that visit will not be  
3489 'made-up' in the future. All measures that were not completed will be considered missing data  
3490 and will not be collected during future visits. If a visit mistakenly occurs outside of the designated  
3491 window, this is a protocol deviation. A 'Non-Medical Event Form' will need to be completed.  
3492 Additionally, each visit should occur at approximately the same time of day  $\pm 1$  hour. The interval  
3493 between the time for the participant's methadone/buprenorphine dose should also be consistent  
3494 for each visit ( $\pm 1$  hour).

3495 If a participant is not able to attend his/her Week 16 visit, then it should be rescheduled even  
3496 if it is outside of the scheduling window. This will be documented as a protocol deviation.

3497 **7.2. Experimental Visits Weeks 1, 3, 5, 7, 9, 11, 13, and 15 Procedures**

3498 **7.2.A. Measures/Assessments**

3499 **Physiological Measures Collected and entered directly into REDCap by the interviewer:**

- 3500 1) CO
- 3501 2) Blood Pressure
- 3502 3) Heart Rate
- 3503 4) Body temperature
- 3504 5) Oxygen saturation
- 3505 6) Respiratory rate
- 3506 7) Urine or Saliva Toxicology
- 3507 8) Urine Pregnancy test (if applicable, to be performed every 2 weeks)

3508 **The following assessments will be administered as an interview and will be entered directly**  
3509 **into REDCap by the interviewer:**

- 3510 1) Concomitant Medications
- 3511 2) Medical Event Form, if applicable
- 3512 3) Health Changes Questionnaire
- 3513 4) Time Since Last Cigarette Questionnaire
- 3514 5) Maintenance Drug Dose Questionnaire
- 3515

3516 ***The following assessments will be completed by the participant directly in REDCap:***

- 3517 1) BDI
- 3518 2) OASIS
- 3519 3) COVID19 Symptom Questionnaire
- 3520 4) Respiratory Symptom Questionnaire
- 3521 5) MNWS

3522 In the event that the REDCap website is not functioning, the assessments will be administered  
3523 aloud and participant answers will be recorded securely. The interviewer will enter the data into  
3524 REDCap when it resumes functioning properly. This information should be recorded in the 'End of  
3525 Visit Evaluation Form'.

3526 **7.3. Experimental Visits Weeks 2, 4, 6, 8, 10, 12, 14, and 16 Procedures:**

3527 **7.3.A Measures/Assessments**

3528 **Physiological measures collected and entered directly into REDCap by interviewer:**

- 3529 1) CO

- 3530 2) Blood Pressure
- 3531 3) Heart Rate
- 3532 4) Body temperature
- 3533 5) Oxygen saturation
- 3534 6) Respiratory rate
- 3535 7) Urine or Saliva Toxicology
- 3536 8) Urine Pregnancy test (if applicable)

3537 **The following assessments will be administered as an interview and will be entered directly**  
 3538 **into REDCap by the interviewer:**

- 3539 1) Concomitant Medications
- 3540 2) Medical Event Form, if applicable
- 3541 3) Health Changes Questionnaire
- 3542 4) Time Since Last Cigarette Questionnaire
- 3543 5) Maintenance Drug Dose Questionnaire
- 3544

3545 **The following assessments will be completed by the participant directly in REDCap:**

- 3546 1) BDI
- 3547 2) OASIS
- 3548 3) Respiratory Symptom Questionnaire
- 3549 4) COVID19 Symptom Questionnaire
- 3550 5) MNWS
- 3551 6) QSU (usual brand)
- 3552 7) QSU (study cigarette)
- 3553 8) Vaping Craving Questionnaire
- 3554 9) CES (usual brand)
- 3555 10) CES (study cigarette)
- 3556 11) Vaping Evaluation Questionnaire
- 3557 12) PANAS
- 3558 13) Cigarette Purchase Task - Usual Brand Cigarette Version (weeks 4, 8, 12 and 16 only)
- 3559 14) Cigarette Purchase Task – Study Cigarette Version (weeks 4, 8, 12 and 16 only)
- 3560 15) Cross-price Elasticity Task<sup>120</sup>- e-cigarettes and combustible cigarettes (weeks 4, 8, 12 and  
 3561 16 only) (for e-cigarette experimental conditions only)
- 3562 16) Penn State Electronic Cigarette Dependence Index (weeks 8 and 16 only)
- 3563 17) Respiratory Health Questionnaire (weeks 8 and 16 only)
- 3564 18) FTND (weeks 8 and 16 only)
- 3565 19) Perceived Health Risks Questionnaire (weeks 8 and 16 only)
- 3566 20) Smoking Stages of Change Algorithm and Contemplation Ladder (weeks 8 and 16 only)
- 3567 21) WISDM – Brief Scale
- 3568 22) Drug Use Questionnaire – 1 month version (weeks 8 and 16 only)
- 3569 23) Perceived Stress Scale (weeks 8 and 16 only)
- 3570 24) Alcohol Use Questionnaire – 1 month version (weeks 8 and 16 only)
- 3571 25) E-cigarette flavor rating questionnaire (weeks 4, 8, 12 and 16 only)
- 3572

3573 In the event that the REDCap website is not functioning, the assessments will be administered  
 3574 aloud and participant answers will be recorded securely. interviewer will enter the data into  
 3575 REDCap when it resumes functioning properly. This information should be recorded in the 'End  
 3576 of Visit Evaluation Form'.

3577 ***Biological Samples to be collected:***

- 3578 1) First void urine sample (Weeks 8 and 16 only)
- 3579 2) Saliva sample (Weeks 8 and 16 only)
- 3580

3581 **7.4. Interactive Voice Response System:**

3582 Participants will continue to use the IVR system on a daily basis throughout the experimental  
3583 period to record the number of study cigarettes smoked per day, measurement of e-cig use and  
3584 use of non-study cigarettes or other tobacco products. Measurement of e-cig use will be  
3585 collected by asking two questions: how many daily e-cigarette episodes occurred, where one  
3586 episode consists **of around 10-15 puffs** or up to approximately 10 minutes, and what proportion  
3587 of pods and/or cartridges were used per day. Participants will also be asked to log how many  
3588 flavors of e-cigs they used per day. During the first week after Baseline 1, the IVR system will  
3589 collect information about mood and withdrawal symptoms.  
3590

3591 **7.5. Variable Incentive Program:**

3592 An incentive program has been developed with the goal of improving attendance at  
3593 scheduled assessment sessions, compliance with using only study-provided tobacco products,  
3594 and encouraging honest self-reports regarding all nicotine/tobacco use.

3595 Briefly, participants will receive a total of seven tickets for each weekly visit they attend after  
3596 randomization (Visits 03-18, weeks 1-16). In total, participants could earn 112 valid tickets across  
3597 the 16 visits. Participants will be instructed that these tickets correspond to attendance (one  
3598 ticket), honest reporting (one ticket), compliance in bringing back used and unused  
3599 pods/cartridges (two tickets) and adherence to using only the assigned study product (three  
3600 tickets). Participants who do not bring back all of their unused study product and used packaging  
3601 will be told that they may not be eligible to earn the two compliance tickets.

3602 Participants will be further instructed that all of the tickets that they receive “could” be eligible for  
3603 entry into a monthly drawing for prizes, but that only tickets that are “validated” will be eligible for  
3604 prizes.

3605 Since it is prohibitively expensive to test urine samples each week for each participant and  
3606 because it is currently not feasible to detect with reasonable precision non-compliance based on  
3607 biomarkers in the two higher nicotine group, we plan to only validate the attendance tickets.  
3608 Hence, each participant who attends their regularly scheduled weekly session will have a total of  
3609 seven validated tickets entered into the monthly drawing.

3610 To convey the message that we may be validating honest reporting and use of only study-  
3611 provided products, in a bogus pipeline of sorts, we will tell the participants that a composite  
3612 assessment of the measures that we collect MAY be used to validate the amount of nicotine and  
3613 tobacco products that they are using. So there is some minor deception involved, but technically  
3614 we could conduct urine toxicology testing for both purposes. Hence, if the urine toxicology testing  
3615 is presented as something that MAY be done for validation purposes, we feel that any deception  
3616 is relatively minor. For scientific/economic reasons we are just electing to restrict validation to  
3617 attendance. Nevertheless, we will debrief all participants upon the completion of the trial. We will  
3618 inform them that the incentive program was based exclusively on attendance due to the relatively  
3619 high cost of urine toxicology testing and other practical problems with shipping the urines for  
3620 prompt testing.

3621 Drawings will be conducted on the 1st of each month. Validation will be performed by staff  
3622 who have no participant interaction and are not blind to condition. Any ticket drawn will be eligible  
3623 for an incentive as the only true contingency is for attendance. There will be no mention of the  
3624 basis for earning incentives (i.e., whether the ticket was for attendance, honesty, adherence).  
3625 Participants will simply be informed that he or she earned an incentive from the drawing.

3626 Each drawing will be independent (without replacement); consequently, some participants will  
3627 not win a prize and others may win more than one during the study if more than one of their  
3628 tickets is drawn. After confirming winners, the remaining tickets from each month will be  
3629 discarded (i.e., tickets will only be entered into one drawing). The monthly prize amounts are  
3630 detailed below.

3631 We estimate based on the 2 ½ years we think it will take to complete this study, that  
3632 participants will win an average of approximately \$65 in prizes or an additional \$5.50 per week  
3633 per participant.  
3634



3635 Grand Prize (1): \$500 cash  
3636 Second Prize (1): \$200 cash  
3637 Third Prize (5): \$10 cash

3638 **7.6. Product and Procedures Compliance Review Sessions:**

3639 At each visit, Baseline 2 through Week 16, participants will be counseled about their use of the  
3640 study cigarettes and assigned e-cigarette (if applicable). Participants will be asked about any  
3641 concerns or obstacles associated with use of the study cigarettes and assigned e-cigarette (if  
3642 applicable). The importance of honest self-reporting will be stressed. Participants will be told that  
3643 they will not be penalized for use of other nicotine or tobacco products and that it is crucial for  
3644 them to report any use of these products. If difficulties are encountered, participants will be asked  
3645 why they think they are experiencing difficulties (e.g., taste, withdrawal symptoms) and to  
3646 problem-solve how to deal with these difficulties in order to meet the protocol requirements.  
3647 Additionally, participants will be counseled about their IVR completion, visit attendance, task  
3648 engagement and product accountability. Refer to the '*Product and Procedures Compliance  
3649 Review Sessions SOP*' for more information.

3650 **7.7. Quit Attempts During the Study Protocol:**

3651 At each weekly session, we will ask each participant if s/he is currently abstaining from  
3652 smoking with the intention of quitting and whether s/he is planning to quit smoking prior to his/her  
3653 next scheduled visit. If a participant is currently abstaining from smoking with the intention to quit,  
3654 we will encourage the participant to continue abstaining, schedule them for weekly visits, and  
3655 provide them with NCI's Clearing the Air manual and local smoking cessation resources. We will  
3656 give them the option of taking study product(s) home but not require that they take them, and if  
3657 they do take the product(s) home we will suggest that they put the product(s) away at home so as  
3658 to remove these cues from view. We will ask the participant to contact staff if they lapse and  
3659 would like to receive study product(s) prior to his/her next visit. If a participant is planning to quit  
3660 but has not initiated a quit attempt, we will ask if s/he has identified a quit date and if so what the  
3661 date is, provide them with the Clearing the Air manual and local smoking cessation resources,  
3662 provide them with the study product(s), and recommend that they put the product(s) away out of  
3663 view on the quit date.

3664 For those in a condition including e-cigarettes, we will defer to the participant's interests in  
3665 continuing to use e-cigarettes as part of their quit attempt. Those who indicate that they will  
3666 continue to use them will be given their same weekly supplies base on their baseline smoking  
3667 rate. Those who indicate that they are planning to abstain from both combusted and non-  
3668 combusted tobacco, we will honor that request. As we state above about combusted cigarettes, if  
3669 participant changes his or her mind about resuming e-cigarette use, they can contact us and  
3670 obtain their weekly supply.

3671

3672 **7.7.A. If a participant is currently abstaining from smoking with the intention to quit:**

- 3673 • Encourage participant to continue abstaining from smoking
- 3674 • Schedule the participant for normal weekly visits
- 3675 • Provide the participant with the '*Clearing the Air*' manual and local smoking cessation  
3676 resources
- 3677 • Give the participant the option to receive study product rather than require him/her to take  
3678 the product
- 3679 • If the participant choses to receive the study product have him/her sign a form  
3680 acknowledging that cigarette availability could be detrimental to the quit attempt.  
3681 Recommend that he/she put the product "away" at home as to avoid unwanted cues to  
3682 smoke.
- 3683 • If the participant chooses not to receive the study product, have him/her contact the lab if  
3684 he/she lapses and would like to pick up or be mailed the study product prior to his/her next  
3685 visit.
- 3686

3687  
3688  
3689  
3690  
3691  
3692  
3693

**7.7.B. If a participant is planning to quit smoking, but has not initiated the quit attempt:**

- Ask if he/she has identified a target quit date and, if so, what that target date is
- Provide the participant with the 'Clearing the Air' manual and local smoking cessation resources
- Provide the participant with the study product as usual. Recommend that on the target date he/she put the product "away" at home as to avoid unwanted cues to smoke.

3694  
3695  
3696  
3697  
3698  
3699  
3700  
3701  
3702  
3703  
3704  
3705

**7.8. Abstinence Assessment Session:**

After the week 16 visit, participants will be required to attend one additional visit the following day. During this visit, participants will have been encouraged to abstain from smoking until their next scheduled visit (approximately 24 hours later). The abstinence assessment session should be scheduled no less than 18 hours and no more than 30 hours after the Week 16 visit. Abstinence will be verified by an expired breath carbon monoxide level of less than or equal to 6ppm. This session will allow us to determine whether the experimental cigarettes and e-cigarette use (for the e-cigarette conditions) have reduced the effects of abstinence on these measures relative to the control conditions. If the participant does NOT meet abstinence criteria, he/she will only receive \$20 for the visit. Those who do meet abstinence criterion will do concurrent choice session detailed below.

3706

**7.8.A Participants Who Meet Criteria for Abstinence**

3707

**7.8.A.1 Measures/Assessments**

3708

**Physiological measures collected and entered directly into REDCap by the interviewer:**

3709  
3710  
3711  
3712  
3713  
3714  
3715  
3716

- 1) CO
- 2) Blood Pressure
- 3) Heart Rate
- 4) Body temperature
- 5) Oxygen saturation
- 6) Respiratory rate
- 7) Urine or Saliva Toxicology

3717  
3718

**The following assessments will be administered as an interview and will be entered directly into REDCap by the interviewer:**

3719  
3720  
3721  
3722  
3723  
3724

- 1) Concomitant Medications
- 2) Medical Event Form, if applicable
- 3) Health Changes Questionnaire
- 4) Time Since Last Cigarette Questionnaire
- 5) Maintenance Drug Dose Questionnaire

3725

**The following assessments will be completed by the participant directly in REDCap:**

3726  
3727  
3728  
3729  
3730  
3731  
3732  
3733  
3734  
3735

- 1) BDI
- 2) OASIS
- 3) COVID19 Symptom Questionnaire
- 4) Respiratory Symptom Questionnaire
- 5) MNWS
- 6) PANAS
- 7) QSU-brief - Usual Cigarette
- 8) QSU-brief - Study Cigarette
- 9) Vaping Craving Questionnaire
- 10) Cigarette Purchase Task - Usual Brand Cigarette Version

- 3736 11) Cigarette Purchase Task - Study Cigarette Version  
3737 12) E-cigarette Purchase Task- E-cigarette Version  
3738

3739 In the event that the REDCap website is not functioning, the assessments will be administered  
3740 aloud and participant answers will be recorded securely. The interviewer will enter the data into  
3741 REDCap when it resumes functioning properly. This information should be recorded in the 'End  
3742 of Visit Evaluation Form'.

## 3743 **7.8.B. Participants Who Do Not Meet Criteria for Abstinence**

### 3744 **7.8.B.1 Measures/Assessments**

3745 **Participants who do NOT meet abstinence criteria will be required to complete the**  
3746 **following assessments:**

- 3747 1) CO  
3748 2) Blood Pressure  
3749 3) Heart Rate  
3750 4) Body temperature  
3751 5) Oxygen saturation  
3752 6) Respiratory rate  
3753 7) Urine or Saliva Toxicology  
3754

3755 **The following assessments will be administered as an interview and entered directly into**  
3756 **REDCap by the interviewer:**

- 3757 1) Concomitant Medications  
3758 2) Health Changes Questionnaire  
3759 3) Medical Event Form, if applicable  
3760 4) TLFB  
3761

3762 ***The following assessments will be completed by the participant directly in REDCap:***

- 3763 1) BDI  
3764 2) OASIS  
3765 3) COVID19 Symptom Questionnaire  
3766 4) Respiratory Symptom Questionnaire  
3767

## 3768 **7.9. Participant Compensation:**

3769 Participants will receive \$25 for the medical consent visit. Participants will receive \$25 plus  
3770 a \$25 bonus for completing each screening visit, plus an additional \$25 bonus for completing the  
3771 visit on time as scheduled. Payment for the first screening session will be made upon its  
3772 completion. Payment for the second session will be made regardless of enrollment as long as the  
3773 participant passes the drug test and meets the minimum requirements for carbon monoxide or  
3774 urinary cotinine levels. Participants who do not pass the drug test or who are visibly intoxicated as  
3775 determined by slurred speech, swaying, or stumbling will not be able to complete the visit and will  
3776 be asked to take another test several days after the first positive. If they are negative for the  
3777 second test, they will be eligible to participate, and if they are positive the for the second text they  
3778 will be excluded. Participants will receive \$100 for each study visit from Baseline 1 to Week 16.  
3779 Participants will also have a chance to earn an additional \$20 bonus for every study visit that is  
3780 completed on time as scheduled starting at Week 1 and ending at Week 15. Participants can  
3781 receive up to \$120.00 for the abstinence session (\$20 if participant does not achieve abstinence,  
3782 \$120 if participant reaches abstinence), \$40 for biochemical verification of abstinence, and up to  
3783 \$306 for completing daily IVR reports of study cigarette and other nicotine and tobacco use..  
3784 There will also be a \$150 bonus distributed at Week 16 for completing the study. Participants who

do not complete the entire study will receive compensation for the sessions that they do complete. Total compensation for completing Study 3, including study visit payments, daily IVR calls and end of study bonus is \$2841. As mentioned above, participants will have a chance to earn additional incentives for compliance, honesty and attendance through urine testing. Participants will be given a debit card at the beginning of the study (during the second portion of the screening visit) and compensation for each visit will be automatically transferred to the card after they complete that visit. If debit cards are unavailable, participants will be paid via an alternate method (i.e. cash or check).

#### 7.10. End of Study:

After a participant has completed all study procedures and has been paid for participation the research assistant will read the following script and give the participant the *Clearing the Air Manual*.

*“If you’ve reduced your smoking during this study, we encourage you to continue these reductions or even consider quitting. We would like to provide you with some resources should you decide to try to abstain from smoking (give “Clearing the Air” and hotline information). Please also feel free to consult with your physician and use any medications he/she deems appropriate. We will call you in approximately 30 days to ask about your smoking since leaving the study. There is no right answer and we know how difficult quitting can be. Please just answer honestly. The call will take less than 5 minutes. Thanks again for your participation.”*

The following assessments will be administered using REDCap:

- 1) End of Study Questionnaire

#### 7.11. 30-Day Follow up Phone Call:

Participants will receive a follow-up phone call between 25 and 35 days after the abstinence assessment session to assess their smoking patterns. The phone questionnaire will last less than five minutes. The questionnaire will ask if the participant is still smoking, how much and whether he/she has attempted to quit smoking since the end of the study. Participants will receive 5 variable incentive program lottery tickets for completing the call as compensation.

Those who report abstinence will be invited to complete biochemical verification and be compensated \$40 for doing so. Abstinence will be achieved by a carbon monoxide reading of 6 parts per million (ppm) or under. A urine sample may also be collected to be sent to the lab for analysis. Additionally, any Medical Event Forms that remain open from the last session will be discussed. If the participant became pregnant during the study, this would have been recorded as a medical event. During this phone call, the research assistant will confirm her due date. This event will remain open until delivery. At that time the licensed medical professional will contact the participant to ask a few questions about the baby’s health and will update the Medical Event Form.

Once a participant has completed all study procedures and all open events have been closed, the PI or Project Manager will review the participant’s record and sign a form indicating study completion for that participant.

## 8.0 Study Randomization

### 8.1 Randomization Process

At the end of Baseline Session 2, participants will be randomized in equal probability to one of the four groups (NNCC, VLNCC, VLNCC + TF e-cig, VLNCC + PF e-cig) for a 16-week period, with stratification by site and menthol cigarette status. Participants will be randomized, using block randomization, in equal number to the dose conditions, with randomization stratified by study site and menthol status. Each site will randomize participants until the total goal of 310 participants across both sites is reached (205 at UVM and 105 at Johns Hopkins), and no effort will be made to recruit a specific number of menthol and non-menthol smokers at each site.

The lead statistician will create a randomization schedule for each of the two sites,

3836 amounting to 150% of expected enrollment at each site. The excess randomization codes will be  
3837 used in the event that a site will have to enroll extra participants due to unexpectedly slow  
3838 enrollment at another site. The nicotine doses will be identified by letter code and only  
3839 Administrative Core personnel with no participant contact will have the link between the  
3840 statistician's letter code and dose assignments. There will be no blinding of e-cigarette conditions.  
3841 The Administrative Core will maintain the randomization schedule and the link between the  
3842 alphabetic code and treatment assignment securely. A second sealed copy will be secured in a  
3843 separate building to protect against loss related to fire or other unforeseen events.

3844 The University of Vermont will be responsible for removing all identifying information from  
3845 cigarettes received from the Research Triangle Institute (RTI), labeling each carton with a blind  
3846 code, assigning product using this blind code based on the randomization schedule being  
3847 provided by the UVM Biostatistics Core, and shipping cigarettes and e-cigarettes to each site as  
3848 needed based on recruitment. Each site will be responsible for tracking product received and  
3849 distributed to participants, collecting unused product from participants, and returning unused  
3850 cigarettes and e-cigarettes to UVM. The participants, investigators and study staff will not have  
3851 knowledge of which product is given to a participant or whether different participants received the  
3852 same or different product.

### 3853 **8.2 Study Product Administration**

3854 During the experimental period, participants will be provided with a 14-day supply of research  
3855 cigarettes equivalent to 150% of their daily smoking rate. Those in the e-cigarette conditions will  
3856 also be provided with a 14-day supply of e-cigarettes equivalent to their daily smoking rate. This  
3857 rate will be calculated at Baseline 2 and will be an average daily smoking rate based on the IVR  
3858 data that reports on the usage for the first seven days following the day of the first baseline visit.  
3859 This will ensure adequate availability of cigarettes in the numerous locations participants may  
3860 typically keep a supply (home, work, vehicle, etc.) as well as avoid expending the entire supply if  
3861 they miss a scheduled visit. Participants will be instructed to use the research cigarettes for 16  
3862 weeks, at which point they are to discontinue product use.

3863 If there is prior knowledge a participant will be missing a visit (i.e. planned vacation, laboratory  
3864 closure, etc.), then the participant will be provided with an adequate supply of cigarettes to make  
3865 up for the missed visit(s). The participant will be given a 21-day supply if one visit is going to be  
3866 missed and a 28-day supply if two visits are going to be missed.

### 3867 **8.3 Guidelines for Reporting other Nicotine Product Use**

3868 Participants will be asked to refrain from use of other non-study cigarettes during the study  
3869 period. If participants have to use another nicotine product, they will be told to use a non-  
3870 combustible product (gum, patch, etc.). Additionally, they will be told there is not a penalty for use  
3871 of non-study products, and that it is crucial for them to report any use of non-study tobacco  
3872 products. Throughout the baseline and experimental periods, an Interactive Voice Response  
3873 (IVR) system will be used on a daily basis to record the number of study cigarettes and non-study  
3874 cigarettes used the previous day. During the baseline and first experimental week, participants will  
3875 also answer daily IVR questions about their mood. Participants will be seen weekly for  
3876 assessments. Brief standardized review sessions focusing on compliance with the study  
3877 cigarettes and other study procedures will be provided at each visit.

### 3878 **8.4 Product Accountability:**

3879 Participants will be required to keep track of all the products provided to them. Therefore, they  
3880 will be instructed to return all unused products and empty cigarette packs e-liquid pods/cartridges  
3881 to the laboratory each week. Research staff will complete the 'Product Accountability Log' as they  
3882 process participants' product. Any discrepancies in the product dispensed versus product  
3883 returned will be discussed and recorded in the log. Research staff will weigh all opened e-cigarette  
3884 pods /cartridges that the participant returns at all visits to determine how much e-liquid was used  
3885 since the participant was last seen. Empty cigarette packs and e-liquid pods/cartridges will not be  
3886 saved. Unused cigarette packs and e-liquid pods/cartridges will be re-distributed to the  
3887 participants during Weeks 1-15. During Week 16, remaining unused cigarettes and e-cigarette  
3888 pods/cartridges returned by the participants will be collected by the research staff.

3889 Participants who report running out of cigarettes or e-liquid pods/cartridges prior to a  
3890 scheduled weekly visit will be allowed to come in for an unscheduled visit to obtain more research  
3891 cigarettes. To determine whether a rate change for cigarettes is necessary, we will look at the  
3892 past two CO levels as compared to the Baseline 2 CO. If the CO trend is consistent with the self-  
3893 report of smoking all of the allotted cigarettes then a rate increase will be granted. The participant  
3894 will then receive cigarettes at a rate of 175% of their daily smoking rate. The maximum increase is  
3895 200% of their daily smoking rate. To determine whether a rate change for e-cigarettes is  
3896 necessary, we will monitor the amount of e-cigarette use the participant is reporting and showing  
3897 through product return along with any unscheduled visits. The investigator may grant an e-  
3898 cigarette rate increase in increments of 25%. The maximum increase for e-cigarettes will be 200%  
3899 of their baseline weekly e-cigarette dispensation rate.

3900 If participants lose more than two packs of cigarettes and/or pods/cartridges and require an  
3901 unscheduled visit to the laboratory to supplement their supply, they will be told the next time they  
3902 lose more than two packs they will have to wait until their next scheduled appointment to receive  
3903 more cigarettes.  
3904

## 3905 **9. Study 3 Statistical Methods and Sample Size**

### 3906 **9.1 Statistical Methods**

3907 Continuous outcomes will be summarized by mean, standard deviation, median and range.  
3908 Categorical outcomes will be summarized by frequencies and percentages. Skewed continuous  
3909 outcomes will be log- or square-root transformed as appropriate. Variables measured at each  
3910 baseline visit will be averaged and the average will be used as the baseline measurement.. As we  
3911 expect conditions to be balanced on important baseline characteristics due to randomization, our  
3912 primary analysis for all endpoints will not be adjusted for potential confounders. However, a  
3913 secondary analysis will be completed for all outcomes adjusting for demographic characteristics  
3914 (e.g., age), that we have found to be important in prior studies. Potential moderators (e.g., SSRI  
3915 vs. non-SSRI antidepressant, depression vs. anxiety disorders, BMI above or below 30) will be  
3916 explored by adding that term and the moderator-by-condition term to the model. We will examine  
3917 age group and gender as potential moderators in a similar fashion.

3918 Participants will be randomized in equal probability to one of the four conditions, with  
3919 randomization stratified by site and menthol cigarette status. All analyses will follow the intent- to-  
3920 treat principle (i.e. subjects will be analyzed according to condition assignment, regardless of  
3921 compliance). The Primary Aim will examine the effects of condition on total CPD (study product  
3922 and non-study product). CPD will be analyzed by week (mean over all days in a seven-day  
3923 period) using a mixed model to account for repeated measures from the same individual.

3924 Models will include baseline CPD as a covariate. Using a mixed model also allows us to include  
3925 the effect of study site as a random effect. Additional analyses conducted using data collected at  
3926 the end of the study will use orthogonal comparisons to test for a linear trend in the decrease in  
3927 CPD, such that  $VLNCC + PF\ e-cig > VLNCC + TO\ e-cig > VLNCC > NNCC$ , with the largest  
3928 reduction in the  $VLNCC + PF\ e-cig$  condition. As we expect that differences among conditions for  
3929 some of the outcomes may not follow a linear pattern, we will use related planned comparisons to  
3930 test for threshold effects, specifically contrasting the NNCC condition to all three VLNCC  
3931 conditions, and NNCC to the two VLNC + e-cigarette conditions. Analysis of cigarette demand,  
3932 smoke exposure and tobacco carcinogens (Aim 2) as well as additional outcomes, including  
3933 subjective effects, will be analyzed in a similar manner. Because Exploratory Aim 3 is based on  
3934 abstinence-induced effects and will be examined using data collected at a single visit at Week 17,  
3935 analysis will be based on an analysis of co-variance model. In addition to the effect of condition,  
3936 we will include important covariates noted above. Exploratory analyses will also be conducted  
3937 combining data collected from three of the vulnerable populations (disadvantaged women of  
3938 childbearing age, opioid dependent individuals, individuals with AD) to explore potential differences  
3939 in effects of study condition across these populations. This will be done with the addition of the  
3940 effects of population and population-by-condition terms to the models described above. Study staff  
3941 will make every effort to minimize missing data, and results of our ongoing trial suggest that this

3942 will be minimal. We will examine the missing data pattern, and if it is missing at random, will use all  
3943 data available, without imputation.

## 3944 9.2. Sample Size

3945 Sample size was determined using NQuery Advisor based on hypothesis tests related to  
3946 Aim 1 to detect a significant difference between conditions on total CPD. The primary statistical  
3947 approach will be repeated measures ANOVAs but  
3948 required sample sizes were calculated focusing on  
3949 expected outcomes at Week 16. This estimate is  
3950 intentionally conservative and calculated based on one  
3951 outcome at one time point; however, given the repeated  
3952 measures nature of our data, we will have correlated  
3953 observations within subjects and thus will achieve the  
3954 stated power to detect differences of even lesser  
3955 magnitude. Estimates are based on preliminary results  
3956 from our current trial and from the Donny et al.<sup>41</sup> study of  
3957 VLNCCs and NNCCs. The between-group effect size is defined as the difference of study condition  
3958 means divided by the common standard deviation. A sample size of 75 participants per condition  
3959 will provide 80% power to detect an effect size of 0.50 for all pair-wise comparisons, with a two-  
3960 sided type 1 error rate of 0.05. While this is larger than the effect size in our ongoing trial, we  
3961 assume that the addition of e-cigs to the VLNCCs will decrease CPD from that seen with VLNCCs  
3962 alone. Thus, while we recognize that we may have insufficient power to detect differences between  
3963 the VLNCC and NNCC alone conditions, we expect a larger effect size when comparing the NNCC  
3964 and either of the VLNCC + e-cig conditions. This sample size also provides greater than 95%  
3965 power to detect a linear dose-response effect across conditions. Because we have relied only on  
3966 outcomes at Week 16, our proposed sample sizes are somewhat conservative, but we believe this  
3967 is appropriate given that the effects of VLNCCs in this population, particularly in combination with  
3968 e-cigs, are unknown. The sample size assumes a 15% loss to follow-up, consistent with our  
3969 experience in the current study. We will increase our overall sample size to 310 in order to allow  
3970 pilot testing with 10 participants.  
3971

| Outcome   | Observed between-group ES (15.8 vs. 0.4 mg/g) |
|-----------|-----------------------------------------------|
| CPD       | 0.38                                          |
| Craving   | 0.74                                          |
| FTND      | 0.14                                          |
| Breath CO | 0.06                                          |

## 3972 10. Potential Risks of Participation

### 3974 10.1 Risks of Participation

- 3975 1) Survey Questionnaires. Surveys include questions about participants' medical and  
3976 psychiatric histories, drug and alcohol use and history, breath tests for cigarette and alcohol  
3977 use, urine or salivary tests of illicit drug use and pregnancy, and questionnaires about your  
3978 mood. Answering these personal questions can make participants uncomfortable. If a  
3979 participant reports thoughts of killing themselves or other indicators of suicidality, a study  
3980 clinician will come to talk to the participant. The participant may also request to see a study  
3981 clinician if he or she is in discomfort and would like help and/or referrals for mental health  
3982 resources.
- 3983 2) Breach of Confidentiality: The risk of the interview is loss of privacy if other people find out  
3984 the results.
- 3985 3) Undue Influence: Undue influence is a possible risk due to monetary compensation for  
3986 participating in these studies. The likelihood of this risk is low because the compensation is  
3987 commensurate with the amount of time and effort required for these studies.
- 3988 4) Drug Testing: A breach of confidentiality could occur and other people could learn of the  
3989 participant's drug use.
- 3990 5) Obtaining Blood Pressure and Heart Rate. The blood pressure cuff may cause minimal  
3991 discomfort. In obtaining blood pressure we may find a participant to have abnormal blood  
3992 pressure and/or heart rate. If participant's blood pressure is abnormal, we will inform the  
3993 participant of this, and participant may be advised to see a doctor, and may also be

3994 contacted by our study doctor. Also, smoking and nicotine can affect the cardiovascular  
3995 system, which may result in changes in blood pressure and/or heart rate.

3996 6) Smoking Cigarettes: All cigarettes are detrimental to a person's health and can lead to  
3997 significant medical problems including:

- 3998 a. Cardiovascular Diseases: Coronary heart disease, heart attack, stroke, peripheral  
3999 vascular disease, reduced blood circulation, abdominal aortic aneurysm
- 4000 b. Respiratory Diseases: Emphysema, bronchitis, and chronic airway obstruction
- 4001 c. Cancers: Cancer of the lung, bladder, cervix, esophagus, kidney, larynx, mouth,  
4002 pancreas, throat, and stomach; leukemia
- 4003 d. Metabolic Diseases: Type 2 Diabetes
- 4004 e. Other Health Risks Associated with Smoking: Including but not limited to infertility,  
4005 lower bone density in postmenopausal women, and hip fracture in women
- 4006 f. Death

4007 7) Smoking Study Cigarettes. All cigarettes are harmful to a person's health and can lead to  
4008 cardiovascular (heart) disease, respiratory (lung) disease, cancer and other health  
4009 problems. In addition to the above medical problems, participants may experience some  
4010 minor negative health effects such as headaches. Participants may also experience  
4011 smoking withdrawal symptoms, which are listed below. In addition, due to the altered  
4012 nicotine levels, there could be a change in a participant's use of cigarettes including the  
4013 manner in which he or she inhales the smoke. Smoking the study cigarette does not  
4014 necessarily provide any less risk than the participant's usual brand of cigarette and could  
4015 pose increased health risks.

4016 8) Using Study E-cigarettes. E-cigarettes are devices that heat nicotine to produce an aerosol.  
4017 The health effects of e-cigarettes are still unclear, but appear to be less than that for  
4018 tobacco cigarettes. Most e-cigarette users have lower nicotine levels than when they  
4019 smoked regular cigarettes. Some e-cigarette users, especially those who use both e-  
4020 cigarettes and regular tobacco cigarettes as well as youth and young adults, can have  
4021 increased nicotine levels. In some rare cases, these use patterns have been associated  
4022 with seizures. Whether this would occur with the concurrent use of very low nicotine  
4023 cigarettes is unclear. E-cigarettes users very often maintain addiction to nicotine, but this  
4024 addiction appears to be somewhat less than that from tobacco cigarettes. Abruptly quitting  
4025 e-cigarettes could cause withdrawal symptoms similar to those from quitting tobacco  
4026 cigarettes (see below) but slightly less severe. The most common side effects include dry  
4027 mouth, irritation of the throat and mouth, and mild cough. The JUUL and Vuse e-cigarettes  
4028 we will be providing have not been well-studied but appear to be of similar risk to other e-  
4029 cigarettes. Participants may have heard that e-cigarettes, or "vapes," can explode and  
4030 seriously injure people. Study staff should instruct participants that although they appear  
4031 rare, these explosions are dangerous. The exact causes of these incidents are not yet  
4032 clear, but some evidence suggests that battery-related issues may lead to vape explosions.  
4033 In order to prevent e-cigarette related injuries, instruct participants to keep their e-cig away  
4034 from other metal objects, never charge the e-cig with a phone or tablet charger, don't  
4035 charge the e-cig overnight or leave it charging unattended, and to stop using the e-cig if the  
4036 batteries get damaged or wet. The participant will be instructed to always keep e-cig liquid  
4037 out of kids' and pets' reach and sight after use. If the study staff learns about additional  
4038 risks of e-cigarettes during the study, participants will be informed of these risks.

4039 9) Mood and Psychiatric Symptom Changes. Participants may experience smoking withdrawal  
4040 symptoms during this study. These symptoms can include anger, anxiousness, craving for  
4041 a cigarette, depressed mood, difficulty concentrating, frustration, increased appetite,  
4042 impatience/impulsivity, irritability, restlessness, sleep problems, and weight gain. These  
4043 feelings can be uncomfortable and can last a couple of weeks, but usually are of minimal  
4044 risk. In addition, if participants have a past history of anxiety, depression, or alcoholism, it  
4045 is possible withdrawal could cause substantial increases in depression and anxiety



4046 symptoms, but this appears to be rare. At each visit, study staff will ask participants how  
4047 they feel. If either study staff or the participant thinks that being in this study is putting the  
4048 participant's mental health at risk, staff may have the participant meet with an on-site  
4049 clinician and/or stop participating in the study.

4050 Further, if a participant report thoughts of killing oneself or other indicators of suicidality, a  
4051 study clinician will come to talk to the participant. Participants may also request to see a  
4052 study clinician if he or she is in discomfort and would like help and/or referrals for mental  
4053 health resources.

4054 10) Returning to Regular Smoking: It is possible that if participants return to smoking their usual  
4055 brand of cigarette at the end of the study they may experience mild and transient nausea,  
4056 dizziness, and lightheadedness.

4057 11) Risk to Fetus. To avoid risks to a fetus, it is important that participants are not pregnant  
4058 during this study. Avoiding sexual activity is the only certain method to prevent pregnancy.  
4059 However, if participants choose to be sexually active, participants should be using  
4060 approved forms of birth control if applicable determined by the Project Medical  
4061 Director, including but not limited to prescribed birth control pills, patch, ring,  
4062 injections, implants or intrauterine device (IUD) or an appropriate "double barrier"  
4063 method. If you choose to be sexually active during this study, pregnancy could still  
4064 result even with the use of these birth control methods.

## 4065 **10.2 Avoiding Risks to Fetus:**

4066 If participants choose to be sexually active, they should use an appropriate "double barrier"  
4067 method of birth control (such as female use of a diaphragm, or contraceptive sponge, in addition to  
4068 male use of a condom) or the female should be using prescribed "birth control" pills, patch, ring,  
4069 injections, implants or intrauterine device (IUD) if applicable determined by the Project Medical  
4070 Director. If a participant endorses a "double barrier" method, our medical professional will speak to  
4071 the participant to confirm which methods will be used during the duration of the study. Participants  
4072 will be tested for pregnancy every two weeks beginning at screening through the last study visit. If a  
4073 participant becomes pregnant during the study, she will be withdrawn from the study.  
4074 Approximately 30 days after being withdrawn or having a positive pregnancy test at the last study  
4075 visit, the research staff will call the participant to confirm her due date. The licensed medical  
4076 professional will follow-up with the participant after delivery to ask questions about the baby's  
4077 health.

## 4078 **10.3 Expected benefits of participation:**

4079 There are no benefits from participating in the study. The information obtained from this  
4080 study may ultimately help the Food and Drug Administration decide how best to regulate nicotine  
4081 and tobacco products with the goal of improving public health.

# 4082 **11. Protection Against Risk**

## 4083 **11.1 Data Collection Protections**

4084 Research data without identifiers will be maintained in a locked file cabinet and on password-  
4085 protected computers in the research staff workplace, with only code numbers identifying subjects.  
4086 Study consent forms and the linkage between the participants' names and codes will be stored in a  
4087 locked file cabinet inside a locked office. Interviews with participants will be conducted in private  
4088 rooms. Urine or saliva samples for drug and pregnancy tests and tobacco exposure biomarkers  
4089 will be obtained in a private bathroom within the laboratory suite. Subjective measures will be  
4090 administered electronically. The biostatistics and data-management team will provide consistent  
4091 data-management practices for all data in the Center. Using REDCap, which is housed on the  
4092 University of Vermont Medical Center's HIPAA-compliant computing system, will maximize validity  
4093 and reliability of data. REDCap is a secure, web-based system that accommodates local and  
4094 remote data collection by each project team, and allows for data entry work-flow monitoring and  
4095 data quality control monitoring by biometry staff. The RedCap database for this project will be  
4096  
4097  
4098

4099 hosted on the UVMCOM servers. In addition, data will be collected from participants on a daily  
4100 basis using an interactive voice recognition system (IVR) developed and hosted by TeleSage Inc  
4101 ([www.telesage.com](http://www.telesage.com), Chapel Hill, NC). TeleSage is a company with expertise on gathering patient-  
4102 centered outcomes tracking data for mental health clinical and research institutions. TeleSage has  
4103 developed and hosted behavioral health-related research software systems using IVR and Web-  
4104 based technologies and is leader in behavioral health outcomes tracking technologies. For data  
4105 integrity, data entry windows will follow the structure of paper forms as much as possible to allow  
4106 for ease of entry, and will use predefined choices to minimize errors when possible. Data quality  
4107 monitoring will be facilitated with periodic down loads and analysis using a variety of common  
4108 statistical program format such as SAS, Stata, R, and SPSS. Quality control procedures will be  
4109 conducted for all data collected, including analysis of missing data and logic checks for out of  
4110 range and other anomalous values. This secure electronic data gathering and transmission plan,  
4111 overseen by the experienced biostatistical team, will minimize opportunities for breaches of  
4112 confidentiality. Biological samples for nicotine and carcinogen biomarker analysis will be marked  
4113 with participant ID, stored in the locked laboratory suite, and sent to a laboratory for analysis on a  
4114 quarterly basis.

4115 All information collected as part of this study will be accessible only to research staff. No  
4116 information will be shared with participants' clinicians unless the participant requests this in writing.  
4117 All investigators and staff have undergone (and any new staff will undergo) human subjects' ethics  
4118 training as required by UVM and are fully conversant with relevant ethical principals around  
4119 confidentiality. Assessments, consenting and study procedures will be closely supervised by the PI.

4120 The sponsors (NIDA/FDA) as well as the Institutional Review Board and regulatory authorities  
4121 could be granted direct access to original medical and research records for verification of clinical  
4122 trial procedures and/or data. If this is required, it will be done under conditions that will protect  
4123 privacy to the fullest extent possible consistent with laws relating to public disclosure of information  
4124 and the law-enforcement responsibilities of the agency.

#### 4125 **11.2 Data Storage:**

4126 Data will be stored locally at each site. Long-term storage of all study data, for at least 7 years  
4127 after study completion, will be at the University of Vermont.  
4128

## 4129 **12. Adverse Events**

4130 The research assistant will ask about adverse events at each session, using a form that  
4131 assesses the nature, severity, duration, action taken, and outcome of study-related adverse  
4132 events. AEs will be captured from the time of first study cigarette. Participants will be given contact  
4133 cards to inform us of events that occur between study contacts. Any AE that remains open will be  
4134 reviewed and closed at an interview conducted 30 days after the study completion date  
4135 (completers) or when the study should have ended had the participant completed the study  
4136 (dropouts and those withdrawn by investigator).  
4137

4138 All procedures will be monitored to ensure that they conform to the approved protocol. In  
4139 addition, monitoring will be done of all unforeseen circumstances that might arise and affect safety;  
4140 of all reports of serious adverse events as defined in 38 CFR 46 (death, new or prolonged  
4141 hospitalization, persistent or significant disability/incapacity); of other significant adverse events  
4142 (adverse events that lead to drop out by the participant or termination by the investigator); of  
4143 unexpected adverse events resulting from the study, and of expected adverse events.

4144 Any SAE will be brought to the attention of the site PIs as soon as possible and not longer than  
4145 24 hours. Any AE or SAE that is both unexpected and related to study participation will be reported  
4146 to the IRB within 7 days of the event. The local IRB will make a determination as to whether  
4147 additional reporting requirements are needed. IRB actions will be reported to the funding agency  
4148 by the PIs no less than annually and more frequently as recommended by the local IRB. Any SAEs  
4149 will be summarized in the yearly Progress Reports to the funding agency, including a review of  
4150 frequency and severity. All SAEs will be followed through ongoing consultation with the physician  
4151 caring for the patient until they resolve, result in death, or stabilize and are not expected to

4152 improve. The study staff will be in close contact with participants and health care providers  
4153 throughout the study to monitor for potential unanticipated problems. Any unanticipated problems  
4154 will be discussed at the weekly research staff meetings and reported as required to the local IRB.  
4155

### 4156 13. Withdrawal or Monitoring of Participants

4157 **For the participant's protection, participants will be withdrawn immediately from the study if**  
4158 **any of the following occur:**

- 4159 1) Cardiovascular disease (CVD) event: Typically includes MI (heart attack), PTCA  
4160 (angioplasty/stenting), bypass surgery, stroke, peripheral vascular disease (arterial  
4161 blockages in arms or legs leading to procedure or surgery). Less common CVD problems  
4162 would be new cardiac arrhythmias (e.g., new atrial fibrillation) or new valvular disease (e.g.,  
4163 mitral or aortic regurgitation).
- 4164 2) DVT/PE (deep vein thrombosis/pulmonary embolism, i.e., blood clots in the venous  
4165 system).
- 4166 3) Suicide Attempt: A participant will be withdrawn if he/she attempts suicide at any time  
4167 during participation in the study.
- 4168 4) Psychiatric Hospitalization: A participant will be withdrawn if he/she is hospitalized for  
4169 psychiatric reasons at any time during participation in the study.
- 4170 5) Pregnancy: If participant indicates she is pregnant or has a positive pregnancy test at any  
4171 time during the study, she will be withdrawn from the study, and this event will remain open  
4172 until delivery. At that time the licensed medical professional will contact the participant to  
4173 ask a few questions about the baby's health and will update the open 'Medical Event Form'.  
4174 A positive pregnancy test at Week 16 will trigger a 'Medical Event Form' to be completed  
4175 but will not result in withdrawal since she is no longer receiving study product.
- 4176 6) Expired breath carbon monoxide increase: A participant will be withdrawn from the study if  
4177 the average of two consecutive CO readings during the same visit is 100 ppm or greater.
- 4178 7) Marked increase in smoking: A participant will be withdrawn from the study if he/she meets  
4179 **BOTH** of the following criteria for two consecutive weeks
  - 4180 a. Cigarette per day increase: The average CPD increases by more than 100% from  
4181 the average CPD during baseline.
  - 4182 b. Expired breath carbon monoxide increase: If the average of two consecutive CO  
4183 measurements in the same visit is
    - 4184 i. CO is greater than 50 ppm if CO at Baseline 1 is <20 ppm.
    - 4185 ii. CO is greater than 60 ppm if CO at Baseline 1 is 20 – 34 ppm.
    - 4186 iii. CO is greater than 70 ppm if CO at Baseline 1 is 35 – 49 ppm.
    - 4187 iv. CO is greater than 80 ppm if CO at Baseline 1 is 50 – 64 ppm.
    - 4188 v. CO is greater than 90 ppm if CO at Baseline 1 is 65 – 80 ppm.
  - 4189 c. Note: If the second consecutive visit is the last study visit, then the participant  
4190 would not be withdrawn from the study.
- 4191 8) If a participant is discharged from or discontinues his or her methadone or buprenorphine  
4192 treatment, they will be discontinued from the study.  
4193

4194 **The following will be monitored and can lead to the participant being withdrawn by the PI or**  
4195 **Licensed Medical Professional:**

- 4196 1) Cigarettes per day increase: Continued participation will be evaluated by the site PI if the  
4197 average number of cigarettes per day (CPD) increases by more than 100% from the  
4198 average CPD during baseline as determined by CPD at Baseline 2.
- 4199 2) Blood pressure (BP) or heart rate (HR) changes: If any of the following occur post-  
4200 enrollment: 1) BP is at or above 160/100 or below 90/50, or 2) HR is at or above 115 bpm or  
4201 below 45 bpm a manual blood pressure and heart rate measurement will be taken after 10

4202 minutes have passed. If the manual reading is still out of range, a 'Blood Pressure and Heart  
4203 Rate Symptom Checklist' and 'Medical Event Form' will be completed, and the participant  
4204 will be monitored by the medical professional.

- 4205 3) Expired breath Carbon Monoxide increase: If the average of two consecutive CO  
4206 measurements meets the criteria below then the 'Medical Event Form' will be completed  
4207 and the participant will be monitored by the medical professional.
- 4208 a. CO is greater than 50 ppm if CO at Baseline 1 is <20 ppm.
  - 4209 b. CO is greater than 60 ppm if CO at Baseline 1 is 20 – 34 ppm.
  - 4210 c. CO is greater than 70 ppm if CO at Baseline 1 is 35 – 49 ppm.
  - 4211 d. CO is greater than 80 ppm if CO at Baseline 1 is 50 – 64 ppm.
  - 4212 e. CO is greater than 90 ppm if CO at Baseline 1 is 65 – 80 ppm.
- 4213 4) Any hospitalization or debilitation in which participation in the study could be detrimental to  
4214 the recovery process. This will be self-reported by the participant and will be reviewed by  
4215 the site PI and medical professional to determine whether continued participation in the study  
4216 is appropriate.
- 4217 5) If a participant is behaving in an inappropriate or threatening manner, admits to lying about  
4218 eligibility criteria, is participating in other smoking research studies that could affect the  
4219 primary outcome measures, etc., then the PI can withdraw him/her from the study at the  
4220 PI's discretion.
- 4221 6) If a participant fails to attend regularly scheduled research assessment visits or comply with  
4222 the research procedures or schedule, then the PI can withdraw him/her from the study at the  
4223 PI's discretion.
- 4224 7) Increase in psychiatric symptoms: Exacerbation in symptoms noted during the study (i.e.,  
4225 change in BDI category from mild to moderate or moderate to severe) will trigger review by  
4226 the study's licensed medical professional. The PI will withdraw the participant upon the  
4227 licensed medical professional's recommendation.  
4228

#### 4229 **14. Data Safety Monitoring Board**

4230 A Data and Safety Monitoring Board (DSMB) has been established to monitor safety outcomes  
4231 and will be comprised of four members. The DSMB will be chaired by Kevin Delucchi, PhD.,  
4232 Professor in Residence of Biostatistics in Psychiatry at the University of California San Francisco  
4233 and Director of the Quantitative Core of the San Francisco Treatment Research Center; Eden  
4234 Evins, MD, MPH., Cox Family Professor of Psychiatry at Harvard Medical School and Director of  
4235 Center for Addiction Medicine at Massachusetts General Hospital; Ari Kirshenbaum, PhD,  
4236 Professor of Psychology at Saint Michael's College who he teaches courses in  
4237 psychopharmacology and neuroscience, and currently has grants from NIH and NSF for work in  
4238 human behavioral pharmacology and his grant-funded work focuses on cognitive and behavioral  
4239 responses to nicotine and cannabinoids; and Elisabeth Johnson, Ph.D., who has over twenty years  
4240 of clinical experience in women's health and pediatrics, including caring for women with substance  
4241 use disorders.

#### 4242 **Conflict of Interest**

4243 None of the board members will be otherwise affiliated with the center and each member will  
4244 complete a conflict of interest disclosure form prior to each meeting. Ad hoc specialists may be  
4245 invited to participate as non-voting members at any time if additional expertise is desired.

#### 4246 **Monitoring Activities and Frequency of Meetings**

4247 The DSMB will set their own agenda and decisions about monitoring; e.g. how frequently to  
4248 monitor, what threshold requires changes to protocol or stopping the study, and whether to view  
4249 raw or analyzed data. The DSMB will be given FDA and EMEA guidelines for DSMBs and recent  
4250 reviews on DSMBs. A brief report will be generated from each meeting for the study record and  
4251 forwarded to each of the study site's Institutional Review Boards (IRB) and NIDA's Program Officer  
4252 with the progress report. The DSMB will be available to convene outside of the regular meetings, if  
4253 necessary. If concerns should arise regarding a particular subject, or any troublesome trends in the

4254 experiences of participants, they will make appropriate recommendations for changes in protocol,  
4255 as needed. The project investigators will continue to examine safety data, blind to study condition,  
4256 in case they wish to make study modifications. Before modifications are made, they will inform the  
4257 DSMB and request their comments.  
4258

#### 4259 **Communication Plan to IRB, NIDA, and FDA (if applicable)**

4260 All IRBs, the FDA and the NIDA's Program Officer will be informed of any significant action  
4261 taken as a result of the Data and Monitoring Board's findings. Study Participants will be informed of  
4262 any changes in risk.  
4263

#### 4264 **Protection of Confidentiality**

4265 For DSMB meetings only de-identified data, including blinded study site and condition type, will  
4266 be provided to the board. All data and discussion during the meeting will be confidential.  
4267

### 4268 **15. Investigational Tobacco Product**

4269  
4270 The University of Vermont Center on Tobacco Regulatory Science will complete an  
4271 Investigational Tobacco Product (ITP) application with the FDA to cover the experimental  
4272 cigarettes being used in this study. This application encompasses both Project 2 sites.  
4273

### 4274 **16. Certificate of Confidentiality**

4275 To help protect the participant's privacy, Dr. Stephen Higgins, PhD, will obtain a Certificate of  
4276 Confidentiality from the national Institute on Drug Abuse. With this certificate, the researchers  
4277 cannot be forced to disclose information that may identify the participants, even by a court  
4278 subpoena, in any federal, state, or local civil, criminal, administrative, legislative, or other  
4279 proceedings. The researchers will use the Certificate to resist any demands for information that  
4280 would identify the participants, except as explained below. The Certificate cannot be used to resist a  
4281 demand for information from personnel of the United States Government that is used for auditing or  
4282 evaluation of federally funded projects or for information that must be disclosed in order to meet the  
4283 requirements of the Federal Food and Drug Administration (FDA).

4284 The Certificate of Confidentiality does not prevent the participant or a member of their family  
4285 from voluntarily releasing information about themselves and their involvement in the research. If an  
4286 insurer, employer or other person obtains the participant's written consent to receive research  
4287 information, then the researcher may not use the Certificate to withhold that information.

4288 The Certificate of Confidentiality does not prevent the researchers from disclosing voluntarily,  
4289 without consent, information that would identify the individual as a participant of the research  
4290 project in instances such as evidence of child abuse or a participant's threatened violence to self or  
4291 others.  
4292

### 4293 **17. Outcome Variables**

#### 4294 **Primary Endpoints for Study 3:**

- 4295 1) Cigarette Smoked per Day (CPD)
- 4296 2) Nicotine Dependence Severity

#### 4297 **Secondary Endpoints for Study 3:**

- 4298 1) Measures of adherence: non-study cigarette use, drop-out rate
- 4299 2) Measures of psychiatric symptoms: BDI, OASIS
- 4300 3) Measures of discomfort/dysfunction: MNWS, QSU
- 4301 4) Measures of other health-related behaviors: breath alcohol, urine or salivary drug screen,  
4302 TLFB-drug use, Alcohol Use Questionnaire, Drug Use Questionnaire, weight
- 4303 5) Measures of nicotine/tobacco dependence: FTND, WISDM
- 4304 6) Measures of tobacco exposure: CO, total nicotine equivalents, NNN, NNAL, minor

- 4305 alkaloids
  - 4306 7) Measures of intention to quit: Stages of Change, Contemplation Ladder
  - 4307 8) Measures of compensatory smoking: puff topography, filter analysis
  - 4308 9) Measures of other tobacco use: TLFB-other tobacco
  - 4309 10) Measures of cigarette characteristics: CES, Cigarette Purchase Task
  - 4310 11) Measures of cardiovascular function: heart rate, blood pressure, urine 11-dehydroTXB2
  - 4311 12) Measures of perceived risk: Perceived Health Risk Questionnaire
  - 4312 13) Safety outcome variables: Adverse Events (AEs), Serious Adverse Events (SAEs)
  - 4313
  - 4314
  - 4315
-

## 18. References

1. U.S. Department of Health and Human Services. *The Health Consequences of Smoking—50 Years of Progress: A Report of the Surgeon General*. Centers for Disease Control and Prevention, National Center for Chronic Disease Prevention and Health Promotion (US) Office on Smoking and Health, Atlanta GA; 2014.
2. Lasser K, Boyd JW, Woolhandler S, Himmelstein DU, McCormick D, Bor DH. Smoking and mental illness: A population-based prevalence study. *JAMA*. 2000;284(20):2606-2610.
3. Lawrence D, Mitrou F, Zubrick SR. Smoking and mental illness: results from population surveys in Australia and the United States. *BMC Public Health*. 2009;9:285. doi:10.1186/1471-2458-9-285.
4. Schroeder SA. American health improvement depends upon addressing class disparities. *Prev Med*. 2016; 92:6-15. Doi: 10.1016/j.pymed.2016.02.024.
5. Villanti AC, Johnson AL, Ambrose BK, et al. Flavored Tobacco Product Use in Youth and Adults: Findings From the First Wave of the PATH Study (2013-2014). *Am J Prev Med*. March 2017. doi:10.1016/j.amepre.2017.01.026.
6. Conway KP, Green VR, Kasza KA, et al. Co-occurrence of tobacco product use, substance use, and mental health problems among adults: Findings from Wave 1 (2013-2014) of the Population Assessment of Tobacco and Health (PATH) Study. *Drug Alcohol Depend*. 2017;177:104-111. doi:10.1016/j.drugalcdep.2017.03.032.
7. Engström A, Adamsson C, Allebeck P, Rydberg U. Mortality in patients with substance abuse: a follow-up in Stockholm County, 1973-1984. *Int J Addict*. 1991;26(1):91-106.
8. Grinshpoon A, Barchana M, Lipshitz I, Rosca P, Weizman A, Ponizovsky AM. Methadone maintenance and cancer risk: an Israeli case registry study. *Drug Alcohol Depend*. 2011;119(1-2):88-92. doi:10.1016/j.drugalcdep.2011.05.028.
9. Hser YI, McCarthy WJ, Anglin MD. Tobacco use as a distal predictor of mortality among long-term narcotics addicts. *Prev Med*. 1994;23(1):61-69. doi:10.1006/pmed.1994.1009.
10. Hurt RD, Offord KP, Croghan IT, et al. Mortality following inpatient addictions treatment. Role of tobacco use in a community-based cohort. *JAMA*. 1996;275(14):1097-1103.
11. Jamal A, King BA, Neff LJ, Whitmill J, Babb SD, Graffunder CM. Current cigarette smoking among adults - United States, 2005-2015. *MMWR Morb Mortal Wkly Rep*. 2016;65(44):1205-1211. doi:10.15585/mmwr.mm6544a2.
12. Clemmey P, Brooner R, Chutuape MA, Kidorf M, Stitzer M. Smoking habits and attitudes in a methadone maintenance treatment population. *Drug Alcohol Depend*. 1997;44(2-3):123-132.
13. Guydish J, Passalacqua E, Tajima B, Chan M, Chun J, Bostrom A. Smoking prevalence in addiction treatment: a review. *Nicotine Tob Res*. 2011;13(6):401-411. doi:10.1093/ntr/ntr048.
14. Haas AL, Sorensen JL, Hall SM, et al. Cigarette smoking in opioid-using patients presenting for hospital-based medical services. *Am J Addict*. 2008;17(1):65-69. doi:10.1080/10550490701756112.
15. Mutschler NH, Stephen BJ, Teoh SK, Mendelson JH, Mello NK. An inpatient study of the effects of buprenorphine on cigarette smoking in men concurrently dependent on cocaine and opioids. *Nicotine Tob Res*. 2002;4(2):223-228. doi:10.1080/14622200210124012.
16. Nahvi S, Richter K, Li X, Modali L, Arnsten J. Cigarette smoking and interest in quitting in methadone maintenance patients. *Addict Behav*. 2006;31(11):2127-2134. doi:10.1016/j.addbeh.2006.01.006.
17. Richter KP, Gibson CA, Ahluwalia JS, Schmelzle KH. Tobacco use and quit attempts among methadone maintenance clients. *Am J Public Health*. 2001;91(2):296-299.

- 4363 18. Parker M, Streck JM, Sigmon SC. Prevalence and severity of nicotine dependence in opioid-  
4364 dependent vs. general population using national data. In preparation.
- 4365 19. Clarke JG, Stein MD, McGarry KA, Gogineni A. Interest in smoking cessation among injection  
4366 drug users. *Am J Addict.* 2001;10(2):159-166.
- 4367 20. Dunn KE, Sigmon SC, Reimann E, Heil SH, Higgins ST. Effects of smoking cessation on illicit  
4368 drug use among opioid maintenance patients: A pilot study. *J Drug Issues.* 2009;39(2):313-  
4369 328.
- 4370 21. Frosch DL, Shoptaw S, Jarvik ME, Rawson RA, Ling W. Interest in smoking cessation among  
4371 methadone maintained outpatients. *J Addict Dis.* 1998;17(2):9-19.  
4372 doi:10.1300/J069v17n02\_02.
- 4373 22. Kozlowski LT, Skinner W, Kent C, Pope MA. Prospects for smoking treatment in individuals  
4374 seeking treatment for alcohol and other drug problems. *Addict Behav.* 1989;14(3):273-278.
- 4375 23. Sees KL, Clark HW. When to begin smoking cessation in substance abusers. *J Subst Abuse*  
4376 *Treat.* 1993;10(2):189-195.
- 4377 24. Nahvi S, Ning Y, Segal KS, Richter KP, Arnsten JH. Varenicline efficacy and safety among  
4378 methadone maintained smokers: a randomized placebo-controlled trial. *Addiction.*  
4379 2014;109(9):1554-1563. doi:10.1111/add.12631.
- 4380 25. Okoli CTC, Khara M, Procyshyn RM, Johnson JL, Barr AM, Greaves L. Smoking cessation  
4381 interventions among individuals in methadone maintenance: a brief review. *J Subst Abuse*  
4382 *Treat.* 2010;38(2):191-199. doi:10.1016/j.jsat.2009.10.001.
- 4383 26. Poling J, Rounsaville B, Gonsai K, Severino K, Sofuoglu M. The safety and efficacy of  
4384 varenicline in cocaine using smokers maintained on methadone: a pilot study. *Am J Addict.*  
4385 2010;19(5):401-408. doi:10.1111/j.1521-0391.2010.00066.x.
- 4386 27. Reid MS, Fallon B, Sonne S, et al. Smoking cessation treatment in community- based  
4387 substance abuse rehabilitation programs. *J Subst Abuse Treat.* 2008;35(1):68-77.  
4388 doi:10.1016/j.jsat.2007.08.010.
- 4389 28. Richter KP, McCool RM, Catley D, Hall M, Ahluwalia JS. Dual pharmacotherapy and  
4390 motivational interviewing for tobacco dependence among drug treatment patients. *J Addict Dis.*  
4391 2005;24(4):79-90.
- 4392 29. Miller ME, Sigmon SC. Are Pharmacotherapies Ineffective in Opioid-Dependent Smokers?  
4393 Reflections on the Scientific Literature and Future Directions. *Nicotine Tob Res.*  
4394 2015;17(8):955-959. doi:10.1093/ntr/ntv030.
- 4395 30. Substance Abuse and Mental Health Services Administration (SAMHSA). *Results from the*  
4396 *2012 National Survey on Drug Use and Health: Summary of National Findings*, NSDUH Series  
4397 H-46, HHS Publication No. (SMA) 13-4795. Rockville, MD: Substance Abuse and Mental  
4398 Health Services Administration; 2013.
- 4399 31. Substance Abuse and Mental Health Services Administration (SAMHSA). *National Survey of*  
4400 *Substance Abuse Treatment Services (N-SSATS): 2012. Data on Substance Abuse Treatment*  
4401 *Facilities.* BHSIS Series S-66, HHS Publication No. (SMA) 14-4809. Rockville, MD: Substance  
4402 Abuse and Mental Health Services Administration; 2013.
- 4403 32. Benowitz NL, Henningfield JE. Establishing a nicotine threshold for addiction. The implications  
4404 for tobacco regulation. *N Engl J Med.* 1994;331(2):123-125.  
4405 doi:10.1056/NEJM199407143310212.
- 4406 33. Benowitz NL, Henningfield JE. Reducing the nicotine content to make cigarettes less addictive.  
4407 *Tob Control.* 2013;22 Suppl 1:i14-i17. doi:10.1136/tobaccocontrol-2012-050860.
- 4408 34. Donny EC, Hatsukami DK, Benowitz NL, Sved AF, Tidey JW, Cassidy RN. Reduced nicotine  
4409 product standards for combustible tobacco: building an empirical basis for effective regulation.



- 4410 *Prev Med.* 2014;68:17-22. doi:10.1016/j.ypmed.2014.06.020.
- 4411 35. Fagan P, King G, Lawrence D, et al. Eliminating tobacco-related health disparities: directions  
4412 for future research. *Am J Public Health.* 2004;94(2):211-217.
- 4413 36. Becker KM, Rose JE, Albino AP. A randomized trial of nicotine replacement therapy in  
4414 combination with reduced-nicotine cigarettes for smoking cessation. *Nicotine Tob Res.*  
4415 2008;10(7):1139-1148. doi:10.1080/14622200802123294.
- 4416 37. Benowitz NL, Hall SM, Stewart S, Wilson M, Dempsey D, Jacob P. Nicotine and carcinogen  
4417 exposure with smoking of progressively reduced nicotine content cigarette. *Cancer Epidemiol*  
4418 *Biomarkers Prev.* 2007;16(11):2479-2485. doi:10.1158/1055-9965.EPI-07-0393.
- 4419 38. Benowitz NL, Dains KM, Hall SM, et al. Smoking behavior and exposure to tobacco toxicants  
4420 during 6 months of smoking progressively reduced nicotine content cigarettes. *Cancer*  
4421 *Epidemiol Biomarkers Prev.* 2012;21(5):761-769. doi:10.1158/1055-9965.EPI-11-0644.
- 4422 39. Donny EC, Jones M. Prolonged exposure to denicotinized cigarettes with or without  
4423 transdermal nicotine. *Drug Alcohol Depend.* 2009;104(1-2):23-33.  
4424 doi:10.1016/j.drugalcdep.2009.01.021.
- 4425 40. Donny EC, Houtsmuller E, Stitzer ML. Smoking in the absence of nicotine: behavioral,  
4426 subjective and physiological effects over 11 days. *Addiction.* 2007;102(2):324-334.  
4427 doi:10.1111/j.1360-0443.2006.01670.x.
- 4428 41. Donny EC, Denlinger RL, Tidey JW, et al. Randomized trial of reduced-nicotine standards for  
4429 cigarettes. *N Engl J Med.* 2015;373(14):1340-1349. doi:10.1056/NEJMsa1502403.
- 4430 42. Hatsukami DK, Kotlyar M, Hertsgaard LA, et al. Reduced nicotine content cigarettes: effects on  
4431 toxicant exposure, dependence and cessation. *Addiction.* 2010;105(2):343-355.  
4432 doi:10.1111/j.1360-0443.2009.02780.x.
- 4433 43. Hatsukami DK, Perkins KA, Lesage MG, et al. Nicotine reduction revisited: science and future  
4434 directions. *Tob Control.* 2010;19(5):e1-e10. doi:10.1136/tc.2009.035584.
- 4435 44. Hatsukami DK, Luo X, Dick L, et al. Reduced nicotine content cigarettes and use of alternative  
4436 nicotine products: exploratory trial. *Addiction.* 2017;112(1):156-167. doi:10.1111/add.13603.
- 4437 45. Walker N, Howe C, Bullen C, et al. The combined effect of very low nicotine content cigarettes,  
4438 used as an adjunct to usual Quitline care (nicotine replacement therapy and behavioural  
4439 support), on smoking cessation: a randomized controlled trial. *Addiction.* 2012;107(10):1857-  
4440 1867. doi:10.1111/j.1360-0443.2012.03906.x.
- 4441 46. Zeller M, Hatsukami D, Strategic dialogue on tobacco harm reduction group. The strategic  
4442 dialogue on tobacco harm reduction: a vision and blueprint for action in the US. *Tob Control.*  
4443 2009;18(4):324-332. doi:10.1136/tc.2008.027318.
- 4444 47. Dani JA, Harris RA. Nicotine addiction and comorbidity with alcohol abuse and mental illness.  
4445 *Nat Neurosci.* 2005;8(11):1465-1470. doi:10.1038/nn1580.
- 4446 48. Benowitz, N. Compensatory smoking of low-yield cigarettes. In: Shopland, Burns, Benowitz,  
4447 Amacher, editors. NCI smoking and tobacco control monograph 13: Risks associated with  
4448 smoking cigarettes with low machine-measured yields of tar and nicotine. Bethesda, MD: US  
4449 Dept of Health and Human Services, Public Health Service, National Institutes of Health,  
4450 National Cancer Institute; 2001. p 39-64.
- 4451 49. Kozlowski LT, O'Connor RJ, Sweeney CT. Cigarette design. In: Shopland, Burns, Benowitz,  
4452 Amacher, editors. NCI smoking and tobacco control monograph 13: Risks associated with  
4453 smoking cigarettes with low machine-measured yields of tar and nicotine. Bethesda, MD: US  
4454 Dept of Health and Human Services, Public Health Service, National Institutes of Health,  
4455 National Cancer Institute; 2001. p 13-37.
- 4456 50. Higgins ST, Heil SH, Sigmon SC, et al. Addiction potential of reduced nicotine content

- 4457 cigarettes in populations with psychiatric disorders and other vulnerabilities to tobacco  
4458 addiction. *JAMA Psychiatry*. In press.
- 4459 51. Donny EC, Walker N, Hatsukami D, Bullen C. Reducing the nicotine content of combusted  
4460 tobacco products sold in New Zealand. *Tob Control*. 2017;26(e1):e37- e42.  
4461 doi:10.1136/tobaccocontrol-2016-053186.
- 4462 52. Benowitz NL, Donny EC, Hatsukami DK. Reduced nicotine content cigarettes, e- cigarettes  
4463 and the cigarette end game. *Addiction*. 2017;112(1):6-7. doi:10.1111/add.13534.
- 4464 53. Quisenberry AJ, Koffarnus MN, Hatz LE, Epstein LH, Bickel WK. The Experimental Tobacco  
4465 Marketplace I: Substitutability as a function of the price of conventional cigarettes. *Nicotine Tob  
4466 Res*. 2016;18(7):1642-1648. doi:10.1093/ntr/ntv230.
- 4467 54. Dawkins L, Kimber C, Puwanesarasa Y, Soar K. First- versus second-generation electronic  
4468 cigarettes: predictors of choice and effects on urge to smoke and withdrawal symptoms.  
4469 *Addiction*. 2015;110(4):669-677. doi:10.1111/add.12807.
- 4470 55. Farsalinos KE, Spyrou A, Tsimopoulou K, Stefopoulos C, Romagna G, Voudris V. Nicotine  
4471 absorption from electronic cigarette use: comparison between first and new- generation  
4472 devices. *Sci Rep*. 2014;4:4133. doi:10.1038/srep04133.
- 4473 56. Goniewicz ML, Kuma T, Gawron M, Knysak J, Kosmider L. Nicotine levels in electronic  
4474 cigarettes. *Nicotine Tob Res*. 2013;15(1):158-166. doi:10.1093/ntr/nts103.
- 4475 57. Talih S, Balhas Z, Eissenberg T, et al. Effects of user puff topography, device voltage, and  
4476 liquid nicotine concentration on electronic cigarette nicotine yield: measurements and model  
4477 predictions. *Nicotine Tob Res*. 2015;17(2):150-157. doi:10.1093/ntr/ntu174.
- 4478 58. Trtchounian A, Williams M, Talbot P. Conventional and electronic cigarettes (e- cigarettes)  
4479 have different smoking characteristics. *Nicotine Tob Res*. 2010;12(9):905- 912.  
4480 doi:10.1093/ntr/ntq114.
- 4481 59. Hecht SS, Carmella SG, Kotandeniya D, et al. Evaluation of toxicant and carcinogen  
4482 metabolites in the urine of e-cigarette users versus cigarette smokers. *Nicotine Tob Res*.  
4483 2015;17(6):704-709. doi:10.1093/ntr/ntu218.
- 4484 60. Goniewicz ML, Gawron M, Smith DM, Peng M, Jacob P, Benowitz NL. Exposure to nicotine  
4485 and selected toxicants in cigarette smokers who switched to electronic cigarettes: A  
4486 longitudinal within-subjects observational study. *Nicotine Tob Res*. 2017;19(2):160-167.  
4487 doi:10.1093/ntr/ntw160.
- 4488 61. Hefner K, Rosenheck R, Merrel J, Coffman M, Valentine G, Sofuoglu M. E-cigarette use in  
4489 veterans seeking mental health and/or substance use services. *J Dual Diagn*. 2016;12(2):109-  
4490 117. doi:10.1080/15504263.2016.1172895.
- 4491 62. Hefner K, Valentine G, Sofuoglu M. Electronic cigarettes and mental illness: Reviewing the  
4492 evidence for help and harm among those with psychiatric and substance use disorders. *Am J  
4493 Addict*. 2017;26(4):306-315. doi:10.1111/ajad.12504.
- 4494 63. Peters EN, Harrell PT, Hendricks PS, O'Grady KE, Pickworth WB, Voci FJ. Electronic  
4495 cigarettes in adults in outpatient substance use treatment: Awareness, perceptions, use, and  
4496 reasons for use. *Am J Addict*. 2015;24(3):233-239. doi:10.1111/ajad.12206.
- 4497 64. Prochaska JJ, Grana RA. E-cigarette use among smokers with serious mental illness. *PLoS  
4498 ONE*. 2014;9(11):e113013. doi:10.1371/journal.pone.0113013.
- 4499 65. Stein MD, Caviness CM, Grimone K, Audet D, Borges A, Anderson BJ. E-cigarette knowledge,  
4500 attitudes, and use in opioid dependent smokers. *J Subst Abuse Treat*. 2015;52:73-77.  
4501 doi:10.1016/j.jsat.2014.11.002.
- 4502 66. Bullen C, Howe C, Laugesen M, et al. Electronic cigarettes for smoking cessation: a  
4503 randomised controlled trial. *Lancet*. 2013;382(9905):1629-1637. doi:10.1016/S0140-

- 4504 6736(13)61842-5.
- 4505 67. Caponnetto P, Auditore R, Russo C, Cappello GC, Polosa R. Impact of an electronic cigarette  
4506 on smoking reduction and cessation in schizophrenic smokers: a prospective 12-month pilot  
4507 study. *Int J Environ Res Public Health*. 2013;10(2):446-461. doi:10.3390/ijerph10020446.
- 4508 68. Tseng T-Y, Ostroff JS, Campo A, et al. A randomized trial comparing the effect of nicotine  
4509 versus placebo electronic cigarettes on smoking reduction among young adult smokers.  
4510 *Nicotine Tob Res*. 2016;18(10):1937-1943. doi:10.1093/ntr/ntw017.
- 4511 69. Adriaens K, Van Gucht D, Declerck P, Baeyens F. Effectiveness of the electronic cigarette: An  
4512 eight-week Flemish study with six-month follow-up on smoking reduction, craving and  
4513 experienced benefits and complaints. *Int J Environ Res Public Health*. 2014;11(11):11220-  
4514 11248. doi:10.3390/ijerph111111220.
- 4515 70. Stein MD, Caviness C, Grimone K, Audet D, Anderson BJ, Bailey GL. An open trial of  
4516 electronic cigarettes for smoking cessation among methadone-maintained smokers. *Nicotine  
4517 Tob Res*. 2016;18(5):1157-1162. doi:10.1093/ntr/ntv267.
- 4518 71. Glasser AM, Collins L, Pearson JL, et al. Overview of electronic nicotine delivery systems: A  
4519 systematic review. *Am J Prev Med*. 2017;52(2):e33-e66. doi:10.1016/j.amepre.2016.10.036.
- 4520 72. Lechner WV, Meier E, Wiener JL, et al. The comparative efficacy of first- versus second-  
4521 generation electronic cigarettes in reducing symptoms of nicotine withdrawal. *Addiction*.  
4522 2015;110(5):862-867. doi:10.1111/add.12870.
- 4523 73. Vansickel AR, Eissenberg T. Electronic cigarettes: effective nicotine delivery after acute  
4524 administration. *Nicotine Tob Res*. 2013;15(1):267-270. doi:10.1093/ntr/nt316.
- 4525 74. Bonhomme MG, Holder-Hayes E, Ambrose BK, et al. Flavoured non-cigarette tobacco product  
4526 use among US adults: 2013-2014. *Tob Control*. 2016;25(Suppl 2):ii4-ii13.  
4527 doi:10.1136/tobaccocontrol-2016-053373.
- 4528 75. Audrain-McGovern J, Strasser AA, Wileyto EP. The impact of flavoring on the rewarding and  
4529 reinforcing value of e-cigarettes with nicotine among young adult smokers. *Drug Alcohol  
4530 Depend*. 2016;166:263-267. doi:10.1016/j.drugalcdep.2016.06.030.
- 4531 76. Goldenson NI, Kirkpatrick MG, Barrington-Trimis JL, et al. Effects of sweet flavorings and  
4532 nicotine on the appeal and sensory properties of e-cigarettes among young adult vapers:  
4533 Application of a novel methodology. *Drug Alcohol Depend*. 2016;168:176-180.  
4534 doi:10.1016/j.drugalcdep.2016.09.014.
- 4535 77. Berg CJ. Preferred flavors and reasons for e-cigarette use and discontinued use among never,  
4536 current, and former smokers. *Int J Public Health*. 2016;61(2):225-236. doi:10.1007/s00038-  
4537 015-0764-x.
- 4538 78. Kistler CE, Crutchfield TM, Sutfin EL, et al. Consumers' preferences for electronic nicotine  
4539 delivery system product features: A structured content analysis. *Int J Environ Res Public  
4540 Health*. 2017;14(6). doi:10.3390/ijerph14060613.
- 4541 79. Czoli CD, Goniewicz M, Islam T, Kotnowski K, Hammond D. Consumer preferences for  
4542 electronic cigarettes: results from a discrete choice experiment. *Tob Control*. 2016;25(e1):e30-  
4543 e36. doi:10.1136/tobaccocontrol-2015-052422.
- 4544 80. Pesko MF, Kenkel DS, Wang H, Hughes JM. The effect of potential electronic nicotine delivery  
4545 system regulations on nicotine product selection. *Addiction*. 2016;111(4):734-744.  
4546 doi:10.1111/add.13257.
- 4547 81. Etter JF. Electronic cigarettes: a survey of users. *BMC Public Health*. 2010;10:231.  
4548 doi:10.1186/1471-2458-10-231.
- 4549 82. Farsalinos KE, Romagna G, Tsiapras D, Kyrzopoulos S, Spyrou A, Voudris V. Impact of  
4550 flavour variability on electronic cigarette use experience: an internet survey. *Int J Environ Res*

- 4551 *Public Health*. 2013;10(12):7272-7282. doi:10.3390/ijerph10127272.
- 4552 83. Litt MD, Duffy V, Oncken C. Cigarette smoking and electronic cigarette vaping patterns as a  
4553 function of e-cigarette flavourings. *Tob Control*. 2016;25(Suppl 2):ii67- ii72.  
4554 doi:10.1136/tobaccocontrol-2016-053223.
- 4555 84. Yingst JM, Veldheer S, Hrabovsky S, Nichols TT, Wilson SJ, Foulds J. Factors associated with  
4556 electronic cigarette users' device preferences and transition from first generation to advanced  
4557 generation devices. *Nicotine Tob Res*. 2015;17(10):1242- 1246. doi:10.1093/ntr/ntv052.
- 4558 85. Bogucka-Bonikowska A, Baran-Furga H, Chmielewska K, et al. Taste function in methadone-  
4559 maintained opioid-dependent men. *Drug Alcohol Depend*. 2002;68(1):113-117.
- 4560 86. Fenn JM, Laurent JS, Sigmon SC. Increases in body mass index following initiation of  
4561 methadone treatment. *J Subst Abuse Treat*. 2015;51:59-63. doi:10.1016/j.jsat.2014.10.007.
- 4562 87. Mysels DJ, Sullivan MA. The relationship between opioid and sugar intake: review of evidence  
4563 and clinical applications. *J Opioid Manag*. 2010;6(6):445-452.
- 4564 88. Nolan LJ, Scagnelli LM. Preference for sweet foods and higher body mass index in patients  
4565 being treated in long-term methadone maintenance. *Subst Use Misuse*. 2007;42(10):1555-  
4566 1566. doi:10.1080/10826080701517727.
- 4567 89. Olszewski PK, Levine AS. Central opioids and consumption of sweet tastants: when reward  
4568 outweighs homeostasis. *Physiol Behav*. 2007;91(5):506-512.  
4569 doi:10.1016/j.physbeh.2007.01.011.
- 4570 90. Zador D, Lyons Wall PM, Webster I. High sugar intake in a group of women on methadone  
4571 maintenance in south western Sydney, Australia. *Addiction*. 1996;91(7):1053-1061.
- 4572 91. Chait LD, Griffiths RR. Effects of methadone on human cigarette smoking and subjective  
4573 ratings. *J Pharmacol Exp Ther*. 1984;229(3):636-640.
- 4574 92. Higgins ST, Budney AJ, Hughes JR, Bickel WK, Lynn M, Mortensen A. Influence of cocaine  
4575 use on cigarette smoking. *JAMA*. 1994;272(22):1724.
- 4576 93. Mello NK, Mendelson JH, Sellers ML, Kuehnle JC. Effects of heroin self- administration on  
4577 cigarette smoking. *Psychopharmacology (Berl)*. 1980;67(1):45-52.
- 4578 94. Mello NK, Lukas SE, Mendelson JH. Buprenorphine effects on cigarette smoking.  
4579 *Psychopharmacology (Berl)*. 1985;86(4):417-425.
- 4580 95. Roll JM, Higgins ST, Tidey J. Cocaine use can increase cigarette smoking: evidence from  
4581 laboratory and naturalistic settings. *Exp Clin Psychopharmacol*. 1997;5(3):263-268.
- 4582 96. Schmitz JM, Grabowski J, Rhoades H. The effects of high and low doses of methadone on  
4583 cigarette smoking. *Drug Alcohol Depend*. 1994;34(3):237-242.
- 4584 97. Dunn KE, Sigmon SC, Thomas CS, Heil SH, Higgins ST. Voucher-based contingent  
4585 reinforcement of smoking abstinence among methadone-maintained patients: a pilot study. *J*  
4586 *Appl Behav Anal*. 2008;41(4):527-538.
- 4587 98. Dunn KE, Sigmon SC, Reimann EF, Badger GJ, Heil SH, Higgins ST. A contingency-  
4588 management intervention to promote initial smoking cessation among opioid-maintained  
4589 patients. *Exp Clin Psychopharmacol*. 2010;18(1):37-50. doi:10.1037/a0018649.
- 4590 99. Sigmon SC, Miller ME, Meyer AC, et al. Financial incentives to promote extended smoking  
4591 abstinence in opioid-maintained patients: a randomized trial. *Addiction*. 2016;111(5):903-912.  
4592 doi:10.1111/add.13264.
- 4593 100. Higgins ST, Heil SH, Sigmon SC, et al. Response to varying the nicotine content of cigarettes  
4594 in vulnerable populations: an initial experimental examination of acute effects.  
4595 *Psychopharmacology (Berl)*. 2017;234(1):89-98. doi:10.1007/s00213-016- 4438-z.

- 4596 101. Beck AT, Steer RA, Brown GK. Manual for Beck Depression Inventory – II 1996; San Antonio,  
4597 TX: Psychological Corporation.
- 4598 102. Norman SB, Cissell SH, Means-Christensen AJ, Stein MB. Development and validation of an  
4599 Overall Anxiety Severity And Impairment Scale (OASIS). *Depress Anxiety*. 2006;23(4):245-  
4600 249.
- 4601 103. Sheehan DV, Lecrubier Y, Sheehan KH, et al. The Mini-International Neuropsychiatric  
4602 Interview (M.I.N.I.): the development and validation of a structured diagnostic psychiatric  
4603 interview for DSM-IV and ICD-10. *J Clin Psychiatry*. 1998;59 Suppl 20:22-33.
- 4604 104. Sheehan DV, Lecrubier Y, Sheehan K, Harnett, Janavs J, Weiller E, et al. (1997). The validity  
4605 of the Mini International Neuropsychiatric Interview (MINI) according to the SCID-P and its  
4606 reliability. *Eur Psychiat* 12, 232–241.
- 4607 105. Babor TF, de la Fuente JR, Saunders J, Grant M. AUDIT: The Alcohol Use Disorders  
4608 Identification Test.Guidelines for use in primary health care. Geneva : World Health  
4609 Organization, 1992.
- 4610 106. Skinner HA. The Drug Abuse Screening Test. *Addict Behav*. 1982; 7(4):363-371.
- 4611 107. Heatherton TF, Kozlowski LT, Frecker RC, Fagerström KO. The Fagerström Test for Nicotine  
4612 Dependence: a revision of the Fagerström Tolerance Questionnaire. *Br J Addict*.  
4613 1991;86(9):1119-1127.
- 4614 108. Piper ME, McCarthy DE, Bolt DM, Smith SS, Lerman C, Benowitz N, et al. Assessing  
4615 dimensions of nicotine dependence: An evaluation of the Nicotine Dependence Syndrome  
4616 Scale (NDSS) and the Wisconsin Inventory of Smoking Dependence Motives (WISDM)  
4617 Nicotine & Tobacco Research. 2008;10:1009–1020.
- 4618 109. Foulds J, Veldheer S, Yingst J, Wilson SJ, Nichols TT, Eissenberg T. Development of a  
4619 questionnaire for assessing dependence on electronic cigarettes among a large sample of ex-  
4620 smoking E-cigarette users. *Nicotine Tob Res*. 2015; 17(2): 186-92.
- 4621 110. DiClemente CC, Prochaska JO, Fairhurst SK, Velicer WF, Velasquez MM, Rossi JS. The  
4622 process of smoking cessation: an analysis of precontemplation, contemplation, and  
4623 preparation stages of change. *J Consult Clin Psychol*. 1991;59(2):295-304.
- 4624 111. McLellan ST, Luborsky L, Cacciola J, Griffith JE, Evans F, Barr HL, O'Brien CP. New data from  
4625 the Addiction Severity Index: Reliability and validity in three centers. *Journal of Nervous and  
4626 Mental Disease*. 1985;173:412-423.
- 4627 112. Cohen S, Kamarck T, Mermelstein R. A global measure of perceived stress. *J Health Soc  
4628 Behav*. 1983;24(4):385-396.
- 4629 113. Watson D, Clark LA, Tellegen A. Development and validation of brief measures of positive and  
4630 negative affect: the PANAS scales. *J Pers Soc Psychol*. 1988;54(6):1063-1070.
- 4631 114. Hughes JR, Hatsukami D. Signs and symptoms of tobacco withdrawal. *Arch Gen Psychiatry*.  
4632 1986;43(3):289-294.
- 4633 115. Cox LS, Tiffany ST, Christen AG. Evaluation of the brief questionnaire of smoking urges (QSU-  
4634 brief) in laboratory and clinical settings. *Nicotine Tob Res*. 2001;3(1):7- 16.
- 4635 116. Dowd AN, Motschman CA, Tiffany ST. Development and Validation of the Questionnaire of  
4636 Vaping Craving. *Nicotine Tob Res*. 2019;12(1):63-70.
- 4637 117. Cappelleri JC, Bushmakin AG, Baker CL, Merikle E, Olufade AO, Gilbert DG. Confirmatory  
4638 factor analyses and reliability of the modified cigarette evaluation questionnaire. *Addict Behav*.  
4639 2007;32(5):912-923.
- 4640 118. Jacobs EA, Bickel WK. Modeling drug consumption in the clinic using simulation procedures:  
4641 demand for heroin and cigarettes in opioid-dependent outpatients. *Exp Clin Psychopharmacol*.

- 4642 1999;7(4):412-426.
- 4643 119. Cassidy RN, Tidey JW, Colby SM, Long V, Higgins ST. Initial development of an e- cigarette  
4644 purchase task: a mixed methods study. *Tob Regul Sci.* 2017; 3(2): 139-150.
- 4645 120. Grace RC, Kivel BM, Laugesen M. Estimating cross-price elasticity of e-cigarettes using a  
4646 simulated demand procedure. *Nicotine Tob Res.* 2015 May;17(5):592-598.
- 4647 121. Snaith RP, Hamilton M, Morley S, Humayan A, Hargreaves D, Trigwell P. A scale for the  
4648 assessment of hedonic tone the Snaith–Hamilton Pleasure Scale. *British Journal of Psychiatry.*  
4649 1995;167:99–103.
- 4650

4651  
4652  
4653  
4654  
4655  
4656  
4657  
4658  
4659  
4660  
4661  
4662  
4663  
4664  
4665  
4666  
4667  
4668  
4669  
4670  
4671  
4672  
4673  
4674  
4675  
4676  
4677  
4678  
4679  
4680  
4681  
4682  
4683  
4684  
4685  
4686  
4687  
4688

**STUDY PROTOCOL: SMOKERS WITH SOCIOECONOMIC DISADVANTAGE (WOMEN OF REPRODUCTIVE AGE)**

**Table of Contents**

1. OBJECTIVE ..... 96

2. SIGNIFICANCE..... 97

    2.1 Special Health Risks of Smoking Among Women ..... 97

    2.2 Empirical Evidence on Reduced Nicotine Content Cigarettes ..... 98

    2.3 Relevance of the Project to the Integrative Theme and Goals of the TCORS ..... 99

    2.4 Relevance to the Scientific Domains and Priorities of the FDA CTP ..... 99

    2.5 How Study Outcomes Will Improve Scientific Knowledge Related to the Manufacture, Distribution, and Marketing of Tobacco Products ..... 100

4. RATIONALE ..... 100

    3.1 Use and Effects of E-Cigarettes ..... 100

    3.2 E-Cigarette Prevalence ..... 100

    3.3 E-Cig Effects on Smoking ..... 100

    3.4 Products to be Tested ..... 101

    3.5 Summary ..... 102

4. PROJECT STUDY METHODS ..... 102

5. STUDY SCREENING PROCEDURES ..... 102

    5.1 Participants ..... 102

    5.2 Recruitment ..... 103

    5.3 Informed Consent Process ..... 104

    5.4 Screening Measures ..... 105

    5.5 Suicidality/Mental Health Monitoring ..... 106

    5.6 Inclusion/Exclusion Criteria ..... 107

    5.7 Eligibility Determination ..... 109

6. STUDY BASELINE PROCEDURES ..... 109

    6.1 Visit Scheduling Requirements for Baseline Period ..... 111

    6.2 Measures/Assessments ..... 111

    6.3 E-Cigarette Training Sessions ..... 112

    6.4 Interactive Voice Response System ..... 113

7. STUDY EXPERIMENTAL PROCEDURES ..... 114

    7.1 Experimental Period ..... 114

    7.2 Experimental Visits Weeks 1, 3, 5, 7, 9, 11, 13, and 15 Procedures ..... 114

        7.2.A. Measures/Assessments ..... 114

    7.3 Experimental Visits Weeks 2, 4, 6, 8, 10, 12, 14, and 16 Procedures ..... 115

        7.3.A. Measures/Assessments ..... 115

|      |                                                                                               |     |
|------|-----------------------------------------------------------------------------------------------|-----|
| 4689 | 7.4 Interactive Voice Response System .....                                                   | 116 |
| 4690 | 7.5 Variable Incentive Program.....                                                           | 116 |
| 4691 | 7.6 Product and Procedures Compliance Review Sessions .....                                   | 117 |
| 4692 | 7.7 Quit Attempts During the Study Protocol .....                                             | 117 |
| 4693 | 7.7.A. If a participant is currently abstaining from smoking with the intention to quit.....  | 118 |
| 4694 | 7.7.B. If a participant is planning to quit smoking, but has not initiated the quit attempt.. | 118 |
| 4695 | 7.8 Abstinance Assessment Session .....                                                       | 118 |
| 4696 | 7.8.A. Participants Who Meet Criteria for Abstinance.....                                     | 118 |
| 4697 | 7.8.A.1. Measures/Assessments .....                                                           | 118 |
| 4698 | 7.8.B. Participants Who Do Not meet Criteria for Abstinance.....                              | 119 |
| 4699 | 7.8.B.1. Measures/Assessments .....                                                           | 119 |
| 4700 | 7.9 Participant Compensation .....                                                            | 120 |
| 4701 | 7.10 End of Study.....                                                                        | 120 |
| 4702 | 7.11 30-day Follow Up Phone Call.....                                                         | 120 |
| 4703 | 8. STUDY RANDOMIZATION .....                                                                  | 121 |
| 4704 | 8.1 Randomization Process .....                                                               | 121 |
| 4705 | 8.2 Study Product Administration.....                                                         | 121 |
| 4706 | 8.3 Guidelines for Reporting Other Nicotine Product Use.....                                  | 121 |
| 4707 | 8.4 Study Product Accountability .....                                                        | 122 |
| 4708 | 9. STUDY 3 STATISTICAL METHODS AND SAMPLE SIZE .....                                          | 122 |
| 4709 | 9.1 Statistical Methods .....                                                                 | 122 |
| 4710 | 9.2 Sample Size .....                                                                         | 123 |
| 4711 | 10. POTENTIAL RISKS OF PARTICIPATION .....                                                    | 123 |
| 4712 | 10.1 Risks of Participation .....                                                             | 123 |
| 4713 | 10.2 Avoiding Risk to Fetus .....                                                             | 125 |
| 4714 | 10.3 Expected Benefits of Participation .....                                                 | 125 |
| 4715 | 11. PROTECTION AGAINST RISK .....                                                             | 125 |
| 4716 | 11.1 Data Collection Protections.....                                                         | 126 |
| 4717 | 11.2 Data Storage .....                                                                       | 126 |
| 4718 | 12. ADVERSE EVENTS.....                                                                       | 126 |
| 4719 | 13. WITHDRAWAL OR MONITORING OF PARTICIPANTS.....                                             | 127 |
| 4720 | 14. DATA SAFETY MONITORING BOARD .....                                                        | 128 |
| 4721 | 15. INVESTIGATIONAL TOBACCO PRODUCT .....                                                     | 129 |
| 4722 | 16. CERTIFICATE OF CONFIDENTIALITY.....                                                       | 129 |
| 4723 | 17. OUTCOME VARIABLES.....                                                                    | 130 |
| 4724 | 18. REFERENCES.....                                                                           | 131 |
| 4725 |                                                                                               |     |



## Abbreviations

4726

4727

4728

4729

4730

4731

4732

4733

4734

4735

4736

4737

4738

4739

4740

4741

4742

4743

4744

4745

4746

4747

4748

4749

4750

4751

4752

4753

4754

4755

4756

4757

4758

4759

4760

4761

4762

4763

4764

4765

4766

4767

4768

4769

- 3HC: 3-hydroxycotinine
- BAL: Breath alcohol levels
- BDI: Beck's Depression Inventory
- BMI: Body Mass Index
- BP: Blood pressure
- BPM: Beats per minute
- BRIEF-A: Behavioral Rating Inventory of Executive Function
- CES: Cigarette Evaluation Scale
- CO: Carbon monoxide
- COT: Cotinine
- CPD: Cigarettes per day
- CPT: Cigarette Purchase Task
- CPT: Continuous Performance Task
- DAST: Drug Abuse Screening Test
- DDT: Delay Discounting Task
- D-KEFS: Delis-Kaplan Executive Function System
- EDC: Electronic Data Capture
- EQ-5D: Euro-Qol
- FSPTCA: Family Smoking Prevention and Tobacco Control Act
- FTND: Fagerström Test for Nicotine Dependence
- GAD: Generalized Anxiety Disorder
- HR: Heart rate
- IVR: Interactive Voice Response
- MDD: Major Depressive Disorder
- MINI: Mini International Neuropsychiatric Interview
- MNWS: Minnesota Nicotine Withdrawal Scale
- NMR: Nicotine metabolite ratio
- NNAL: 4-(methylnitrosamino)-1-(3-pyridyl)-1-butanol
- NNC: Normal nicotine content
- NNN: *N*-nitrosonornicotine
- OASIS: Overall Anxiety Severity and Impairment Scale
- OUD: Opioid Use Disorder
- PANAS: Positive and Negative Affect Schedule
- PHQ: Patient Health Questionnaire
- PSS: Perceived Stress Scale
- QSU: Questionnaire of Smoking Urges
- RNC: Reduced nicotine content
- SST: Stop Signal Task
- TLFB: Timeline Follow Back
- TPQ: Time Perspectives Questionnaire
- VLNC: Very low nicotine content
- WASI-II: Wechsler Abbreviated Scale of Intelligence-II
- WISDM: Wisconsin Index of Smoking Dependence Motives

## Protocol

### 1. OBJECTIVE

Despite marked reductions in cigarette smoking prevalence in the general U.S. adult population over the past approximately 50 years, smoking rates among women have decreased at a slower rate and have even increased among socioeconomically disadvantaged women where smoking prevalence can be as high as 40%. Smoking among women of reproductive age is a particular concern related to the potential for serious complications should they become pregnant, although smoking also increases risk for other serious adverse impacts on women's reproductive health including cervical cancer. Each of these potential smoking-related adverse health impacts are exacerbated by socioeconomic disadvantage, which is associated with heavier smoking, greater prevalence and severity of nicotine dependence, and a lower likelihood of quitting.

A national policy of reducing the nicotine content of cigarettes has the potential to be an effective method of reducing prevalence of cigarette smoking and associated adverse health outcomes. Controlled trials in the general population of smokers demonstrate that reduced nicotine content cigarettes decrease smoking rates, dependence, and toxin exposure.

Furthermore, our research during the current funding period indicates that reducing the nicotine content of cigarettes decreases the addiction potential of smoking in socioeconomically disadvantaged women, and other groups vulnerable to tobacco addiction. However, tobacco market conditions are likely to exert considerable influence over the extent to which the potential of this promising policy is realized. We hypothesize that the following two conditions will have significant moderating effects on disadvantaged women and other vulnerable populations due to their higher rates of heavy smoking, dependence, and difficulty quitting: (1) having reinforcing alternative sources of non-combusted nicotine readily available and (2) having those alternatives available under conditions that optimize appeal.

The overall goal of the proposed research is to experimentally model whether the availability and appeal of an alternative, non-combusted source of nicotine (i.e., e-cigarettes) will enhance the effectiveness of a reduced nicotine policy for cigarettes in socioeconomically disadvantaged women of reproductive age. Daily female smokers (ages 21-44) will undergo a baseline assessment period and then be randomized to one of the following four conditions: (1) normal nicotine content cigarettes (NNCCs) alone, which will serve as the control condition, (2) very low nicotine content cigarettes (VLNCCs) alone, (3) VLNCC's + nicotinized tobacco-flavored e-cigarettes (TF e-cigs), or (4) VLNCC's + nicotinized preferred flavor e-cigarettes (PF e-cigs). Participants will be asked to use only their assigned products for 16 weeks, and will visit the laboratory weekly to complete measures of smoking topography, cigarette demand using behavioral-economic purchase tasks, withdrawal and craving, and biomarkers of toxicant exposure. In Week 17, participants will be given monetary incentives to abstain from combusted cigarette use for a week and we will assess effects on cigarettes per day (CPD), cigarette demand, and craving and withdrawal.

This research will address the following specific aims:

**Aim 1 (Primary):** Compare the effects of (1) NNCCs alone, (2) VLNCCs alone, (3) VLNCC's + TF e-cigs, or (4) VLNCC's + PF e-cigs flavoring on total number of CPD. We hypothesize that at Week 16, cigarette smoking rates will have decreased in a linear, graded manner (condition 4 > 3 > 2 > 1) with the largest reduction in smoking rate from control levels observed in the VLNCC's + PF e-cigs condition.

**Aim 2 (Secondary):** To compare the effects of the four study conditions on cigarette demand, smoke exposure (breath carbon monoxide) and tobacco carcinogen biomarkers (NNAL, PAH metabolites). We hypothesize that at Week 16, cigarette demand and these biomarkers will have decreased in a linear, graded manner with the largest reduction observed in the VLNC's + PF e-

4820 cig condition.

4821 Aim 3 (Exploratory): To explore the effects of the four study conditions on abstinence- induced  
4822 cigarette demand, craving, and withdrawal in socioeconomically disadvantaged women of  
4823 reproductive age.

4824 The integrative theme of this TCORS is vulnerable populations. The proposed research is  
4825 relevant to FDA CTP's scientific domains of Addiction and Behavior by addressing whether  
4826 reducing the nicotine content of cigarettes reduces cigarette use, dependence, and product  
4827 appeal, and whether these effects are enhanced by availability of appealing alternative sources of  
4828 non-combusted nicotine. It addresses Health Effects by assessing tobacco toxicant exposure and  
4829 other biomarkers. The proposed study is significant and innovative by modeling the impact of a  
4830 national reduced nicotine standards policy for cigarettes in this understudied population. Finally, it  
4831 is programmatic as it builds upon and extends the work our team accomplished during the current  
4832 funding period.

## 4833 2. SIGNIFICANCE

4834  
4835 The 2009 Family Smoking Prevention and Tobacco Control Act (FSPTCA) gives the Food and  
4836 Drug Administration (FDA) regulatory authority over tobacco products, including nicotine levels in  
4837 cigarettes. That is an exciting development as it creates the opportunity to examine the Benowitz  
4838 and Henningfield hypothesis<sup>1</sup> that smoking prevalence, nicotine dependence, and smoking-  
4839 related morbidity and mortality can be lowered substantially by reducing the nicotine content of  
4840 cigarettes to non-addictive levels. Computer modeling predicts that reducing nicotine levels in  
4841 cigarettes would produce substantial improvements in population health.<sup>2</sup> An essential initial step  
4842 towards the implementation of such a policy is to thoroughly investigate its potential effectiveness,  
4843 safety, and potential unintended adverse consequences. Indeed, the FDA's Center for Tobacco  
4844 Products (FDA CTP) seeks to continue programs of multidisciplinary research to assist with the  
4845 mission of investigating such regulatory matters related to the FSPTCA (see RFA-OD-17-006).  
4846 The FDA explicitly notes that researching tobacco regulatory questions, including the Scientific  
4847 Domains of addiction and behavior, in vulnerable populations is a crosscutting agency priority,  
4848 listing women of reproductive age (21-44) among the vulnerable populations of interest.

4849 Despite marked reductions in cigarette smoking prevalence in the general U.S. adult  
4850 population over the past approximately 50 years, smoking rates have decreased at a slower rate  
4851 among women than men, and even increased among economically disadvantaged women.<sup>3,4</sup> We  
4852 recently examined tobacco and other nicotine delivery product use among women of reproductive  
4853 age using the first wave of data from the Population Assessment of Tobacco and Health (PATH)  
4854 dataset.<sup>5,6</sup> Approximately 21% were current smokers, but smoking was strikingly overrepresented  
4855 among socioeconomically disadvantaged women with nearly twice as many women of  
4856 reproductive age with a high school degree or less being current smokers compared to  
4857 women with more education (35% vs. 19%, respectively). These data underscore a robust  
4858 and pervasive inverse association between educational attainment and smoking among women of  
4859 childbearing age.<sup>7-10</sup>

### 4860 2.1 Special Health Risks of Smoking Among Women

4861 In addition to the adverse health consequences of smoking that cross genders, smoking also has  
4862 adverse consequences specific to women's reproductive health. Women who smoke have an  
4863 increased risk of cardiovascular disease, with women who smoke and use oral contraceptives – a  
4864 common combination among women of reproductive age - having a dose-dependent higher risk of  
4865 heart attacks and strokes.<sup>11,12</sup> Women who smoke also have increased risk of cervical cancer,  
4866 infertility, and early menopause.<sup>13-16</sup> Rates of unintended pregnancy are also high in this  
4867 population (61%),<sup>17</sup> while smoking cessation during pregnancy is relatively low (25-35%),<sup>6, 18, 19</sup>  
4868 introducing additional risk for serious adverse maternal and fetal/neonatal consequences. For  
4869 example, smoking during pregnancy increases risk for placenta previa, placental abruption,  
4870 premature rupture of membranes, and preterm delivery. Meta-analyses report increased risks of

4871  
4872  
4873  
4874  
4875  
4876  
4877  
4878  
4879  
4880  
4881  
4882  
4883  
4884  
4885  
4886  
4887  
4888  
4889  
4890  
4891  
4892  
4893  
4894  
4895  
4896  
4897  
4898  
4899  
4900  
4901  
4902  
4903  
4904  
4905  
4906  
4907  
4908  
4909  
4910  
4911  
4912  
4913  
4914  
4915  
4916  
4917  
4918  
4919  
4920  
4921  
4922  
4923  
4924

20-90% for these complications among smokers, with the highest risks among heavier smokers.<sup>20-22</sup> A robust relationship between smoking and intrauterine growth retardation (IUGR) has also been demonstrated in many studies,<sup>15</sup> with increased risks of more than 50% among smokers.<sup>23,24</sup>

## 2.2 Empirical Evidence on Reduced Nicotine Content Cigarettes

While results of extended exposure to very low nicotine content cigarettes (VLNCCs) among more socioeconomically stable smokers are quite promising, little is known about specific effects that VLNCCs may have in disadvantaged women and other more vulnerable populations. With these more medically and socially unstable populations, it was agreed that an acute, laboratory model was an appropriate and safe setting to begin examining reduced nicotine content cigarettes. As described in more detail in the Overall Plan (Section 5.C.3), during the current funding period we completed multisite, double-blind, within- subject assessments of acute response to research cigarettes with varying nicotine content; the first was a small pilot study<sup>25</sup> followed by three larger multisite trials.<sup>26</sup> Participants in these studies were socioeconomically disadvantaged women of reproductive age (21-44), women and men with affective disorders, and women and men with opioid dependence, as smoking prevalence in each of these populations is significantly above prevalence for the U.S. adult population (30%, 32% and 92% vs. 21%, respectively) (National Survey on Drug Use and Health, 2016).<sup>27</sup>

Following brief smoking abstinence, participants were exposed to the varying nicotine dose cigarettes (0.4, 2.3, 5.2, 15.8 mg nicotine/g tobacco) across fourteen 2-4 hour outpatient test sessions. Addiction potential of the cigarettes was assessed using concurrent choice testing and behavioral economic simulation modeling (i.e., Cigarette Purchase Task). Subjective effects were assessed using validated questionnaires, and smoking topography and smoke exposure by a Clinical Research Support System (CRess) device and expired breath carbon monoxide testing, respectively. In both reports and in all three populations, reducing nicotine content decreased the reinforcing value of smoking. The 0.4 mg/g dose differed significantly from the 15.8 mg/g dose (representative of the nicotine content of commercial cigarettes) across all measures of addiction potential, including preference in concurrent choice testing (Figure 1, Panel A). The only difference between populations in that regard was seen in the 0.4 versus 2.4 mg/g dose comparison, where smokers with affective disorders chose the higher dose more often, while disadvantaged women and those with opioid dependence did not exhibit a significant preference between those two doses. Importantly in terms of regulatory implications, preference for higher over lower nicotine- content cigarettes could be reversed by increasing cost of obtaining the higher dose (Figure 1, Panel B). All doses reduced withdrawal symptoms; compensatory smoking was not observed. The consistency of effects noted across the three vulnerable populations underscores the generality of these results, especially regarding the control that nicotine content exerts over smoker preferences despite considerable individual differences.

These initial studies assessed acute response in a laboratory setting, leaving unanswered whether results can be generalized to vulnerable populations chronically using reduced nicotine content cigarettes in naturalistic settings. That question is being answered in our multisite, double-blind field trials in the same three vulnerable populations which are currently underway. Preliminary results for total CPD (study and non-study cigarettes) from initial study completers in each population (41 economically disadvantaged women of reproductive age (non-pregnant), 35 individuals with opioid dependence, and 49 individuals with affective disorders) are shown in

Figure 1

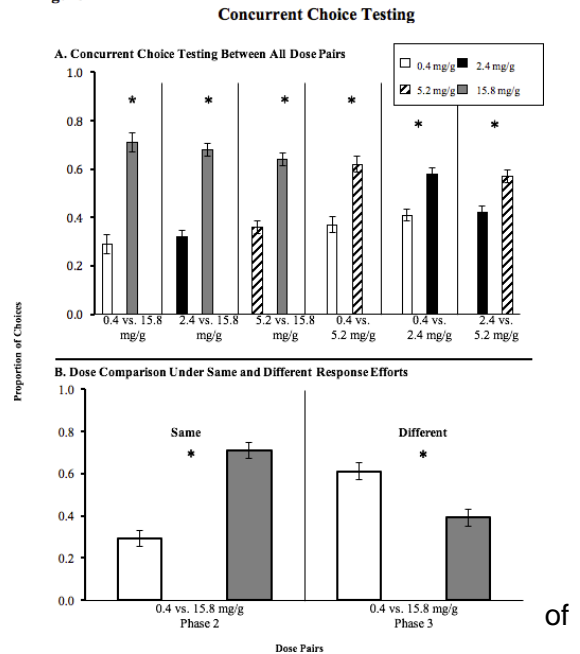

Figure 2. We show results for the 15.8 mg/g control dose representative of commercial cigarettes and the VLNC 0.4 mg/g dose. Mean CPD was significantly lower among those assigned to the VLNC than control cigarette at the 12-week assessment among disadvantaged women ( $p=.03$ ,  $d=0.70$ ) and smokers with affective disorders ( $p<.006$ ,  $d=0.81$ ), but not those with opioid dependence ( $p = .25$ ,  $d=.38$ ). These preliminary results provide encouraging initial evidence that these vulnerable populations are sensitive to the effects of VLNCs on smoking rate. Fagerstrom dependence total scores at 12 weeks are also decreased significantly among those assigned to VLNCs compared to the 15.8 mg/g dose in the disadvantaged women and those with affective disorders but not the opioid dependent population, although we are not yet seeing any evidence of VLNCs increasing measures of quitting in any of the three populations, which, while still preliminary, could represent an important difference in response to VLNCs between healthier and more vulnerable populations of smokers in whom rates of quitting are well known to be lower.

Our work during the Phase 1 funding period indicates that economically disadvantaged women, like more socioeconomically stable smokers, respond to reductions in the nicotine content of cigarettes with reductions in cigarette demand and other measures of addiction potential. However, tobacco market conditions are likely to exert considerable influence over the extent to which the promising effects of reduced-nicotine cigarettes are realized in the natural environment. This may be particularly true of female smokers, who are more motivated to smoke for nonpharmacological reasons as compared to men (e.g.,<sup>28</sup>). Use of electronic cigarettes (e-cigarettes) is increasing sharply in the US and it is important to consider the potential effects of e-cigarette use on a nicotine reduction policy for cigarettes. We believe that encouraging the use of e-cigarettes, by making them more appealing to smokers, may enhance the efficacy of a reduced-nicotine policy for cigarettes.

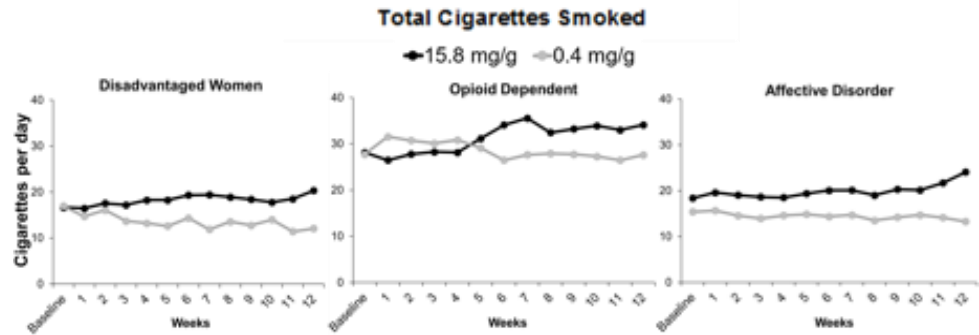

Figure 2. Total cigarettes smoked across 12-week period in three vulnerable populations.

reduced-nicotine cigarettes are realized in the natural environment. This may be particularly true of female smokers, who are more motivated to smoke for nonpharmacological reasons as compared to men (e.g.,<sup>28</sup>). Use of electronic cigarettes (e-cigarettes) is increasing sharply in the US and it is important to consider the potential effects of e-cigarette use on a nicotine reduction policy for cigarettes. We believe that encouraging the use of e-cigarettes, by making them more appealing to smokers, may enhance the efficacy of a reduced-nicotine policy for cigarettes.

### 2.3 Relevance of the Project to the Integrative Theme and Goals of the TCORS

The integrative theme of this TCORS is **vulnerable populations**, and its goals are to model the potential effects of tobacco product standards on product use in vulnerable populations, with the goal of reducing the risks of product use, dependence, and product-related adverse health outcomes. For the FDA to effectively execute its tobacco regulatory responsibilities, it must have sound scientific evidence on how product standards impact tobacco use in populations with high rates of tobacco dependence. Our goal is to provide the FDA with that evidence. This project is relevant to that goal because it will examine the effects of a reduced-nicotine standard for cigarettes, alone and combined with another FDA-regulated product, e-cigarettes, on measures of cigarette use, demand, dependence and tobacco toxicant exposure in this vulnerable population.

### 2.4 Relevance to the Scientific Domains and Priorities of the FDA CTP

This project is highly relevant to CTP's domain of **Addiction** ("understanding the effect of tobacco characteristics on addiction and abuse liability"). By comparing the effects of VLNCs and NNCCs on smoking rates and cigarette dependence this project addresses the first priority in this domain, which is understanding the impact of changes in tobacco product characteristics on dependence. By examining whether e-cig availability and flavors that increase e-cig appeal increase the effects of VLNCs on smoking, this project addresses the second priority in this domain, which is understanding differences in dependence and tobacco use patterns with use of low-nicotine content cigarettes in context with other tobacco products. Several other domains and priorities of the FDA CTP will also be addressed. The **Health Effects** domain refers to

4978 understanding the short- and long-term health effects of tobacco products. This project will  
4979 address this domain by assessing effect of VLNCCs alone and with e-cigs on biomarkers of  
4980 tobacco-related carcinogen exposure and respiratory disease. The **Behavior** domain refers to the  
4981 goal of understanding knowledge, attitudes, and behaviors related to tobacco product use and  
4982 changes in tobacco product characteristics. This project will assess this domain by examining how  
4983 reducing the nicotine content of cigarettes and e-cig flavors affect measures such as product  
4984 appeal, health risk perceptions, and cigarette use.

## 4985 **2.5 How Study Outcomes Will Improve Scientific Knowledge Related to the Manufacture,** 4986 **Distribution and Marketing of Tobacco Products.**

4987 Study outcomes will directly inform scientific knowledge concerning tobacco product  
4988 manufacturing by testing whether a reduction in nicotine content of cigarettes to  $\leq 0.4$  mg  
4989 nicotine/g tobacco would reduce smoking in this vulnerable population. The outcomes will also  
4990 indicate whether continuing to allow the sale of flavored e-cigs improves the efficacy of a reduced-  
4991 nicotine standard for cigarettes on smoking reduction in this population.

## 4992 **3. RATIONALE**

### 4993 **3.1 Use and Effects of E-Cigarettes**

4994 E-cigarettes consist of a cartridge containing an e-liquid solution of nicotine, propylene glycol  
4995 (PG), vegetable glycerin (VG), flavorings, and other additives, which is heated with a battery-  
4996 operated atomizer that vaporizes the solution. The vapor is inhaled and absorbed through the  
4997 mouth, throat and lungs. E-cigarette subtypes include first generation products that resemble  
4998 cigarettes (“cigalikes”) and are disposable or rechargeable, second generation products that  
4999 often resemble pens and have reservoirs that are refilled using e- liquid purchased separately,  
5000 and third generation devices that have use larger batteries, adjustable power delivery and  
5001 replacement heating coils and wicks.<sup>29</sup> Nicotine levels from e-cigarettes can be comparable to  
5002 those observed with cigarettes, depending on e-cigarette characteristics, e-liquid nicotine content  
5003 and user topography.<sup>30-33</sup> Potential risks of e- cigarette use include exposure to low levels of  
5004 carcinogens, toxicants and metals in the vapor, and cytotoxic effects of flavors.<sup>34,35</sup> However, toxin  
5005 and carcinogen levels from e- cigarettes appear to be far lower than those from cigarettes.<sup>36,37</sup>  
5006 Former smokers who had switched to e-cigarettes had 59-99% lower levels of 6 tobacco toxicant  
5007 and carcinogen metabolites than ongoing smokers,<sup>36</sup> which were comparable to reductions seen  
5008 in smokers who had switched from cigarettes to nicotine lozenges.<sup>38</sup> Another study found that  
5009 NNAL, a metabolite of the tobacco-specific carcinogen NNK, was reduced by 57% in 20 smokers  
5010 who had switched to e-cigarettes for one week and by 64% in those who had switched for 2  
5011 weeks.<sup>39</sup>

### 5012 **3.2 E-cigarette Prevalence**

5013 E-cigarette use is increasing sharply in the US and may be particularly so among women, with  
5014 uptake of e-cigarettes in recent years faster in females than males<sup>40</sup> and initial satisfaction with e-  
5015 cigarettes higher among women than men.<sup>41</sup> We recently examined tobacco and other nicotine  
5016 delivery product use among non-pregnant and pregnant women of reproductive age using the first  
5017 wave of data from PATH and found that 6.2% and 4.9% were current e-cigarette users,  
5018 respectively, but current cigarette smokers were orders of magnitude more likely (~ 86 times in  
5019 non-pregnant women) to currently use e-cigarettes compared to never smokers.<sup>5,6</sup> Another recent  
5020 study we conducted surveyed 800 women of reproductive age using Amazon Mechanical Turk  
5021 and also found that e-cigarette use was significantly higher among current cigarette smokers and  
5022 associated with use of nicotine replacement products and other activities consistent with trying to  
5023 reduce or quit smoking.<sup>42</sup>

### 5024 **3.3 E-cigarette Effects on Smoking**

5025 To date, randomized clinical trials of e-cigarette effects on smoking show significant  
5026 reductions in CPD, although little effect on quitting.<sup>43-45</sup> Modest effects on quitting in these trials  
5027 may have been due to use of first generation e-cigarettes that provided variable nicotine delivery  
5028 and are subject to battery failure.<sup>46</sup> A trial using second generation e- cigarette devices found a

5029 cigarette abstinence rates of 34% after 8 weeks of use and 21% 6 months later, with an overall  
5030 reduction in CPD of 60%.<sup>47</sup> E-cigarettes may reduce cigarette smoking by reducing cigarette  
5031 craving and nicotine withdrawal symptoms.<sup>48</sup> Although early studies found that e-cigarettes were  
5032 less effective than cigarettes at reducing cigarette craving and withdrawal,<sup>49-51</sup> second-generation  
5033 e-cigarettes (those with characteristics most similar to the product proposed for this study) reduce  
5034 craving and withdrawal under natural *ad lib* puff topography conditions.<sup>30,47,52</sup>

5035 E-cigarette effects on cigarette craving and withdrawal symptoms are determined by the  
5036 extent to which e-cigarettes are used by smokers. One factor that impacts e-cigarette use is  
5037 flavors. More than two-thirds of current adult e-cigarette users in 2013-2014 used a flavored e-  
5038 cigarette.<sup>53,54</sup> Flavors in e-cigarettes have been shown to substantially enhance the subjective  
5039 appeal and relative reinforcing effects of e-cigarettes<sup>55,56</sup> and have been cited as a reason for e-  
5040 cigarette use among adults<sup>54,57</sup> and key feature of e-cigarette products.<sup>58</sup> Experimental studies  
5041 show that flavors increase demand for e-cigarettes among cigarette smokers.<sup>59,60</sup> particularly  
5042 smokers who are not current e-cigarette users.<sup>60</sup> Studies of e- cigarette users also highlight that  
5043 flavors play an important role in their experience of the product<sup>61-63</sup> and in reducing cigarette  
5044 consumption and craving.<sup>62,64</sup>

5045 Few studies have examined the effects of e-cigarettes expressly in women. One recent study  
5046 reported on gender effects in a study comparing smokers of combusted cigarettes to experienced  
5047 dual users of combusted cigarettes and e-cigarettes and examined gender effects.<sup>65</sup> All  
5048 participants engaged in week-long periods of *ad lib* use interspersed with periods of  
5049 combusted cigarette reduction. Compared to smokers of combusted cigarettes, dual users  
5050 smoked the same number of cigarettes during *ad lib* periods, but quadrupled their use of e-  
5051 cigarettes during smoking reduction periods and were more successful at achieving smoking  
5052 reduction. Among women, dual use was associated with higher nicotine levels and greater  
5053 withdrawal suppression compared to women smoking combusted cigarettes. These results  
5054 suggest that e-cigarettes may be a meaningful alternative to combusted cigarettes among  
5055 women. Also encouraging in terms of the aims of the proposed study are data showing that  
5056 women are more likely than men to use flavored (e.g., menthol, fruit, candy/sweet flavors) tobacco  
5057 products compared to men.<sup>54,66</sup> Another recent survey of women of reproductive age who have  
5058 used e-cigarettes reported that 71% of them have used flavored e-cigarettes.<sup>67</sup>

### 5059 **3.4 Products to be Tested**

#### 5060 Cigarettes to be assessed

5061 The cigarettes to be used in this study were made under an NIH contract with production being  
5062 overseen by the Research Triangle Institute (referred to as "Spectrum cigarettes"). NIH currently  
5063 has approximately 10 million of these cigarettes (of varying types) for research purposes. The  
5064 cigarettes selected for the study span the range of yields likely to produce the hypothesized  
5065 effects, as described above. Spectrum cigarettes are not currently commercially available,  
5066 although they are similar in many ways to marketed cigarettes (e.g., similar manufacturing, filter,  
5067 paper, etc.).

#### 5069 E-cigarettes to be assessed

5070 Both the JUUL and the Vuse Solo will be used and assessed in this study. While JUUL will be  
5071 offered to all participants, participants that are unwilling to use JUUL will be offered the Vuse Solo.

5072 JUUL is a commercially available closed system containing two components. One component  
5073 contains a lithium-ion battery (200 mAh), nichrome coil heater, silica wick, and stainless steel  
5074 vapor path. The other component is the prefilled e-liquid container that also serves as the  
5075 mouthpiece. Each commercially available cartridge holds approximately 0.7 mL of e-liquid  
5076 containing approximately 40 mg of nicotine or 5% nicotine by weight (NBW). A lower dose  
5077 containing approximately 23 mg of nicotine per cartridge or 3% NBW is also marketed but will not  
5078 be used in this study. All containers contain glycerol, propylene glycol, natural oils, extracts and  
5079 flavors, nicotine, benzoic acid. We will not alter the e-liquid in any way. The research staff will  
5080 distribute the e-liquid containers as purchased from the manufacturer. The JUUL apparatus and

5081 5% NBW e-liquids that will be used are legally purchasable and have been as of August 8, 2016.  
5082 We will not alter them in any way.

5083 Vuse Solo is a commercially available closed system containing two components. The  
5084 power/heating device includes a 270 mAh battery, silica wick, microchips, and sensor. The other  
5085 component is the prefilled e-liquid container. Each commercially available cartridge holds  
5086 approximately 1 mL of liquid containing 48 mg of nicotine or 4.8% NBW. All containers contain  
5087 vegetable glycerin, propylene glycol, reverse-osmosis water, glycerin, flavorings, and nicotine.  
5088 The research staff will distribute the e-liquid containers as purchased from the manufacturer. The  
5089 Vuse apparatus and e-liquid cartridges that will be used are legally purchasable and have been as  
5090 of August 8, 2016. We will not alter them in any way.  
5091

### 5092 **3.5. Summary**

5093 Although cigarette smoking is declining in the overall US population, smoking rates have  
5094 decreased at a slower rate among women than men, and even increased among  
5095 economically disadvantaged women. Data from the current funding period indicate that VLNCCs  
5096 significantly reduce addiction potential of smoking during acute exposure and reduce overall  
5097 smoking rates during extended exposure in disadvantaged women and it is highly encouraging  
5098 that a policy of reduced nicotine standards in cigarettes can benefit this vulnerable population.  
5099 However, considering the modest effects of VLNCCs on quitting thus far in studies in the general  
5100 population of smokers, and the difficulties that disadvantaged women and other vulnerable  
5101 populations have with quitting smoking, we believe that other market conditions may need to be in  
5102 place for the considerable potential of reduced nicotine standards to be realized. One such policy  
5103 that we deem critical is the ready availability of alternative, non-combusted sources of nicotine.  
5104 The elevated rates of e-cig uptake among women noted above indicate that they find e-cigs highly  
5105 reinforcing, which is encouraging. We also believe that the appeal of e-cigs will have to be  
5106 enhanced. The method for enhancing appeal that we are proposing to investigate is availability of  
5107 flavors. That market condition also appears to have considerable potential to benefit  
5108 disadvantaged women in light of the greater preference that women have for flavored tobacco  
5109 products.

5110 So, while there is considerable reason for optimism, there is also tremendous need for  
5111 empirical evidence as there has only been a single controlled study reported examining how the  
5112 effects of VLNCCs are moderated by the availability of non-combusted sources of nicotine, and  
5113 that was a preliminary study in the general populations of smokers. As such, the proposed study  
5114 has the potential to contribute significant new knowledge of relevant to the FDA CTP regarding  
5115 the potential impact of a reduced nicotine standards policy in this vulnerable population of  
5116 smokers. The research is also programmatic, as it will build on and complement the work that the  
5117 UVM TCORS team of investigators has accomplished during the current funding period on the  
5118 effects of reduced nicotine content cigarettes in disadvantaged women and other vulnerable  
5119 populations.  
5120

## 5121 **4. Project Study Methods**

5122 This study will use a four-condition, parallel-groups research design. After a baseline period in  
5123 which daily smoking rate and other baseline assessments are completed, participants will be  
5124 randomly assigned to one of the following four conditions for a 16-week experimental period: (1)  
5125 normal nicotine content cigarettes (NNCCs, 15.8 mg/g) alone, which serves as the control  
5126 condition; (2) very low nicotine content cigarettes (VLNCCs, 0.4 mg/g) alone; (3) VLNCCs +  
5127 tobacco-flavored nicotine e-cigs (TF e-cig, 4.8 - 5.0% nicotine by weight, NBW, if they choose  
5128 to use the Vuse or JULL device, respectively); or (4) VLNCCs + preferred-flavor nicotine e-  
5129 cigarette (PF e-cig).  
5130

## 5131 **5. Study Screening Procedures**

### 5132 **5.1 Participants** 5133



5134 Participants will be women ages 21–44 years who have a high school education or less. For  
5135 inclusion, participants must smoke  $\geq 5$  cigarettes per day, have smoked daily for  $\geq 1$  year and  
5136 have breath CO levels  $\geq 8$  ppm or have positive urine cotinine results. Additionally, they must be  
5137 sufficiently literate to complete the research tasks, be in good physical health without serious  
5138 illness or change in health in past three months, and have the technological capabilities to  
5139 complete weekly face-to-face video assessments and the compatibility to use ico Smartphone  
5140 Smokerlyzers for assessing breath carbon monoxide (CO) levels. Exclusionary criteria: We will  
5141 exclude those under the age of 21 for scientific and legal reasons. We will exclude pregnant and  
5142 nursing women and women not reporting use of contraceptives, anyone currently using nicotine  
5143 replacement, bupropion or other pharmacotherapies as cessation aids, those who report daily use  
5144 of e-cigarettes in the past 30 days as they may not be compliant with the study e-cigarettes, and  
5145 anyone intending to quit within 3 months, as participation in this study may not reduce smoking  
5146 and could increase smoke and/or nicotine exposure. Those who exclusively use roll-your-own  
5147 cigarettes or who use other non-cigarette tobacco products (e.g., cigars, smokeless)  $\geq 10$  days in  
5148 the past 30 days are excluded because their use of these products may reduce the validity of our  
5149 main outcome measure, total cigarettes per day (which includes study and non-study cigarettes).  
5150 The following conditions are excluded as they could affect participants' abilities to complete the  
5151 study: unstable medical or medication conditions (significant changes in a serious medical  
5152 condition in the past 3 months, medication changes in the past 4 weeks; details provided in  
5153 Protection of Human Subjects section), symptoms of psychosis or dementia, past-month  
5154 suicidality, suicide attempt in the past 6 months, current (past-6 months) alcohol or substance use  
5155 disorders other than nicotine, positive toxicology screen for illicit drugs (marijuana allowed; one re-  
5156 screen opportunity), positive breath alcohol level (BAL) at screen (one re-screen opportunity).  
5157

## 5158 **5.2 Recruitment**

5159 This study will be conducted at two sites, University of Vermont in Burlington, VT (primary site)  
5160 and Johns Hopkins University in Baltimore, MD. This collaboration will permit us to complete  
5161 studies in a timely manner, enroll a more ethnically diverse sample, and facilitate meaningful  
5162 collaboration across multiple sites, which is one goal of this funding announcement. Power  
5163 estimations were based on preliminary evidence from trials conducted during Phase 1 UVM  
5164 TCORS funding which included an approximately 15% dropout rate across populations. For the  
5165 analyses of primary aims using an intent-to-treat approach, we require 53 randomized in each  
5166 condition (212 total) to test our primary aims. We estimate 10% attrition prior to randomization and  
5167 will therefore enroll up to 59 per condition (236 total) to randomize 212. In addition, we will pilot  
5168 study procedures with 5 participants per e-cigarette condition (10 total).

5169 Participants at both sites will be recruited through Facebook, craigslist, ads in local  
5170 newspapers and on community bulletin boards, and through word of mouth. At UVM, individuals  
5171 recruited from online sources will be directed to a UVM-hosted recruitment website where they will  
5172 have the opportunity to select which research studies interest them. They will then be redirected to  
5173 a brief online screener to assess eligibility. Those who contact us by phone will be given a  
5174 description of the study and asked questions to assess eligibility. If a participant appears to be  
5175 eligible, they will be invited to participate in the first portion of the screening. Research assistants  
5176 will inform eligible participants that the screening will occur over video chat, and will assist the  
5177 participant with setting up an appropriately secure video platform.

5178 During this first portion of the screening, the participant will complete questionnaires through  
5179 REDCap online while the research assistant is present over video chat or phone to deliver  
5180 instructions and to answer any questions. The participant will then answer interviewer-  
5181 administered questionnaires over video chat. Participants who did not yet set up their video  
5182 platforms will do so with the research assistant before beginning any questionnaires. Participants  
5183 will be instructed to have picture identification (e.g. driver's license) available to show the staff. If  
5184 participants anticipate not having acceptable ID, staff should consult with the project coordinator  
5185 or study PI. Initial study eligibility will be determined after data are collected from this visit.  
5186 Participants who meet initial study eligibility will be scheduled for the second portion of the  
5187 screening.

5188 Before the second portion of the screening occurs, eligible participants will receive the  
5189 equipment necessary to use for collecting physiological measurements. Participants will be asked  
5190 to pick up this equipment via curbside pickup at our clinic (UVM University Health Center, UHC),  
5191 which will consist of participants calling staff once they arrive at UHC and staff coming out to give  
5192 participants a bag/box containing the following equipment: a Smokerlyzer; an audio jack adapter  
5193 for the Smokerlyzer if necessary; a blood pressure cuff; an oximeter; a thermometer; a urinary  
5194 cotinine dipstick; urine cups with attached temperature test strips; a pregnancy test strip (if  
5195 applicable) and urine toxicology test strips or a saliva toxicology test. Participants (and staff) will  
5196 be asked to use cloth face coverings when exchanging product. Participants may be invited to  
5197 come inside to pick up this equipment if the participant is asked to wait for this exchange. All  
5198 participants must pass a COVID19 screening before entering the building. If there is any waiting  
5199 that needs to occur inside the building, the participant will wait inside one of our five highly  
5200 ventilated smoking chambers. If there happens to be no space in the smoking chambers, the  
5201 participant will be told that they can not come up to the clinic until space is available. After each  
5202 use, the all of the surfaces in the smoking chambers will be cleaned with 70% or greater of  
5203 alcohol solution by staff wearing a mask and gloves, as well as all of the door handles. If the  
5204 participant uses the bathroom while they are in the clinic, the bathroom surfaces and handles will  
5205 be wiped down after use by staff while masks and gloves are worn. Participants who are using the  
5206 smoking chambers at any point in the study to wait for product or equipment exchange will remain  
5207 in the chambers until a staff member comes to knock on the door to let them out. In this way, we  
5208 can avoid people coming into close contact with each other in the larger room that contains the  
5209 smoking chambers. A minimum of 6 feet of distance will be maintained for all staff and  
5210 participants at all times. For participants who cannot come to the clinic, a commercial courier will  
5211 deliver this equipment to them before the second portion of the screening.

5212 If at any point the Smokerlyzers are not available for distribution, we will conduct the CO test  
5213 curbside before or after participants are invited inside and the courier service will not be available.  
5214 Research Assistants will bring down the CO monitor to the participant. While maintaining 10 feet  
5215 of distance and wearing gloves, staff will explain how the CO monitor works. Once the participant  
5216 is ready, staff will press the button to obtain the measurement and will set the CO monitor down  
5217 and will back away 10 feet. The participant will then come to pick up the device and will blow into  
5218 the monitor. After the participant completes the test, they will set down the monitor and back up  
5219 10 feet and staff will retrieve the monitor. After every use, staff will wipe down the CO monitor with  
5220 disinfectant wipes and hydrogen peroxide wipes. When using the monitor, a D-piece (a portable  
5221 valve filter) must be placed into the monitor and then the single use plastic mouthpiece is placed  
5222 into the D-piece. The monitor has built in SteriTouch technology to ensure optimum infection  
5223 control, and the D- pieces filter out and remove 99.9% of airborne bacteria and greater than 97%  
5224 of viruses for excellent infection control. Each participant will be assigned their own D-piece to use  
5225 throughout the study, and no D-piece will ever be shared among participants. Participants will  
5226 gently exhale into the D-piece for the breath carbon monoxide reading. Participants will be  
5227 instructed only to exhale through the device, not to inhale. D-piece technology also includes a  
5228 one-way valve that prevents air from being drawn back from the monitor. D- pieces will also be  
5229 wiped down after each use with disinfectant wipes and hydrogen peroxide wipes and stored in a  
5230 container at the lab.

5231 Once participants have received the necessary equipment to complete the physiological  
5232 portion of the screening, the research assistant will initiate a video call with the participant. During  
5233 this call, the participant will be instructed on how to use the equipment and then will be asked to  
5234 use the equipment to obtain the following physiological readings: blood pressure, heart rate,  
5235 oxygen saturation, temperature, and breath CO levels. Participants will also be asked to collect a  
5236 urine or saliva sample during the visit. If a saliva sample is collected, the participant you will  
5237 provide the saliva sample over video chat while the staff observes. If a urine sample is collected,  
5238 staff will ask participant to bring this urine sample to the video screen after collection to perform a  
5239 urine toxicology test and a pregnancy test (if applicable). These urine cups will have temperature  
5240 strips affixed to ensure that the sample is valid. Participants who have a carbon monoxide level of  
5241 less than or equal to 8 will also be asked to use the urinary cotinine dipstick to determine whether

5242 they are positive for cotinine. The participant will obtain the physiological readings and perform  
5243 the tests and then will hold the results of the test up to the camera so that the research assistant  
5244 can interpret and record the readings on REDCap, Participants will also be instructed to have  
5245 handy a pack of their usual brand cigarettes, all prescription medications they are currently taking  
5246 and identification (example, driver's license) during this second portion of the screening visit. If  
5247 participants anticipate not having acceptable ID site staff should consult with the project  
5248 coordinator or study PI.

5249 A participant must complete his/her two-part screening session within 90 days of completing  
5250 the pre-screening questionnaire. If the participant is not able to complete the two-part screening  
5251 visit in that timeframe, he/she will need to complete the pre-screening questionnaire again.

### 5252 **5.3 Informed Consent Process:**

5253 Before beginning the informed consent process, potential participants will need to produce  
5254 identification as described above. The interviewer will confirm the age and identity of the  
5255 participant. If the participant is not between the ages of 21 and 44 or has a degree greater than  
5256 high school, she will be dismissed without payment. During the first portion of the screening  
5257 session, study information will be presented and documentation of the participant's informed  
5258 consent via electronic signature on REDCap will be required prior to participating in the screening  
5259 session. In order to ensure adequate informed consent, participants will be asked to read the first  
5260 several lines aloud (to determine literacy) and will then be given ample time to read the consent  
5261 document. If the interviewer suspects the participant is not literate, he or she will have them  
5262 continue reading further to confirm. Inability to read and comprehend written study materials will  
5263 result in ineligibility and the interviewer will inform the participant that they are not eligible. Only  
5264 after the participant and the researcher are fully satisfied that the participant understands the  
5265 purpose of the study, the confidentiality of the data, the procedures, the risks/benefits and his/her  
5266 rights as a research participant will the consent form be signed and the participant undergo  
5267 screening procedures.

### 5268 **5.4 Screening Measures**

5269 Those who consent will be screened for eligibility using the following measures:

5270 **The following physiological measures will be collected and recorded directly into REDCap**  
5271 **by the interviewer:**

- 5272 1. Expired breath carbon monoxide (CO) levels will be assessed using an ico Smokerlyzer  
5273 Smartphone Monitor (Covita – for remote collection) or a Bedfont CO monitor (for curbside  
5274 collection), a reliable and valid measure of recent smoking.
  - 5275 a. Urinary cotinine test strips will be used to assess cotinine levels if a participant's CO  
5276 reading is less than or equal to 8 ppm.
- 5277 2. A urine or saliva toxicology screen will be performed to assess the presence of illicit drugs  
5278 including up to the following drugs: marijuana, cocaine, opiates, oxycodone,  
5279 benzodiazepines, barbiturates, amphetamines, methadone, buprenorphine,  
5280 methamphetamines, MDMA and PCP. Participants who fail the drug screen for drugs other  
5281 than marijuana or their prescribed opioid medication may reschedule the interview but  
5282 will need to be re-consented to ensure they have received adequate informed consent. They  
5283 will be excluded if they are positive for drugs (other than marijuana or prescribed  
5284 medications as determined by PI on a case-by-case basis) the second time.
- 5285 3. Urine Pregnancy Test (HCG detection) will be performed for all participants.
- 5286 4. Blood pressure and heart rate will be measured using an automated blood pressure monitor  
5287 and a finger pulse oximeter to help the licensed medical professional determine final  
5288 participant eligibility. Participants will be told if their blood pressure is in an abnormal range  
5289 and advised to see a doctor by research staff. The research staff will also submit a medical  
5290 event form for the LMP to review along with a Blood Pressure and Heart Rate Symptom  
5291 Checklist form to ascertain details of the symptomatology for the LMP to review. In severe  
5292 cases, the LMP may also choose to call the participant to follow-up and/or withdraw the  
5293 participant from the study if necessary. All of these procedures are documented in our Blood

- 5294 Pressure/Heart Rate Collection: Standard Operating Procedure form which we can submit to  
5295 the IRB if the Committee deems necessary.
- 5296 5. Body temperature, respiratory rate and oxygen saturation will be added as physiological  
5297 measures based on the CDC recommendations and those of Dr. David Kaminsky.  
5298 [https://www.cdc.gov/tobacco/basic\\_information/e-cigarettes/severe-lung-](https://www.cdc.gov/tobacco/basic_information/e-cigarettes/severe-lung-disease/healthcare-providers/index.html)  
5299 [disease/healthcare-providers/index.html](https://www.cdc.gov/tobacco/basic_information/e-cigarettes/severe-lung-disease/healthcare-providers/index.html)

5300 **The following screening assessment will be administered as an interview:**

- 5302 1) The Mini International Neuropsychiatric Interview (MINI) 7.0<sup>70</sup>

5303 **The following screening assessments will be administered as an interview and entered**  
5304 **directly into REDCap by the interviewer:**

- 5305 1) The MINI Plus Modules
- 5306 2) The MINI suicide subscale<sup>71</sup> to evaluate suicide risk.
- 5307 3) MINI Follow-up Questionnaire (if applicable)
- 5308 4) Tobacco Use History and Exposure Questionnaire, which measures variables such as  
5309 smoking amount, cigarette brand, age of initiation of smoking, number of quit attempts,  
5310 duration of quit attempts and duration of smoking.
- 5311 5) Smoking Cessation Therapy Use Questionnaire
- 5312 6) Time Since Last Cigarette Questionnaire
- 5313 7) Medical History Questionnaire to assess current diagnoses, symptoms and past health  
5314 problems.
- 5315 a. Medications will be recorded directly onto the Concomitant Medications form in  
5316 REDCap.
- 5317 8) Drug Abuse Screening Test (DAST-10), which assesses quantity and frequency of  
5318 alcohol and drug use (12 month and 1 month version)

5319 **The following screening assessments will be completed by the participant directly in**  
5320 **REDCap, except where noted otherwise:**

- 5322 1) Demographic History Questionnaire, which will assess age, gender, ethnicity, race,  
5323 education, income, marital status, and employment history.
- 5324 2) Alcohol Use Questionnaire---based on the Alcohol Use Disorders Identification Test<sup>72</sup> (12  
5325 month and 1 month version)
- 5326 3) Drug Use Questionnaire---based on the Drug Abuse Screening Test<sup>73</sup> (12 month and 1  
5327 month version)
- 5328 4) Fagerström Test for Nicotine Dependence (FTND)<sup>74</sup>;
- 5329 5) Wisconsin Inventory of Smoking Dependence Motives-Brief Scale (WISDM)<sup>75</sup> will be  
5330 administered to assess nicotine dependence severity.
- 5331 6) Penn State Electronic Cigarette Dependence Index<sup>76</sup>;
- 5332 7) Smoking Stages of Change Algorithm<sup>77</sup>;
- 5333 8) Identifying Information Form will include the participant's REDCap Subject Identifier,  
5334 name, address (including the county of residence), email address, phone number, age,  
5335 date of birth, and social security number (if applicable).
- 5336 a. This form will be entered into the 'Identifying Information Access Database'.
- 5337 i. Each site will have a separate 'Identifying Information Access Database'.
- 5338 ii. Identifying information will not be shared with other sites. Each site is  
5339 responsible for maintaining confidentiality of this information.
- 5340 iii. Identifying information will be kept in a locked file cabinet (source  
5341 document) and in a password protected Access Database (electronic  
5342 version) separate from all other study data.

- 5343 9) Beck Depression Inventory (BDI-II)<sup>68</sup>, to assess depressive symptoms.  
 5344 (This form has been updated on 1.29.20 so as to use the BDI-II. The BDI-II will be used instead of the BDI so  
 5345 that the data collected will be directly comparable to other projects using the BDI-II).
- 5346 10) Overall Anxiety Severity and Impairment Scale<sup>69</sup>(OASIS); to assess frequency and  
 5347 severity of anxiety symptoms.
- 5348 11) COVID19 Symptom Questionnaire
- 5349 12) Respiratory Symptom Questionnaire will be administered to assess respiratory health

5350  
 5351 In the event that the REDCap website is not functioning, the assessments will be  
 5352 administered aloud and participant answers will be recorded securely. The interviewer will enter  
 5353 the data into REDCap when it resumes functioning properly. This information should be recorded  
 5354 in the 'End of Visit Evaluation Form'.  
 5355

### 5.5 Suicidality/Mental Health Monitoring

5357 Participants who endorse suicidal intention in the past month or a suicide attempt in the past  
 5358 6 months as indicated on the BDI (score > 1 on question 9) or MINI suicide subscale (endorse  
 5359 question 4 and/or 5 on the MINI suicide subscale or question 6 on the MINI suicide subscale with  
 5360 suicide attempt in the past 6 months) or answer "yes" to question A3g on the MINI  
 5361 Neuropsychiatric interview and symptoms have occurred in the past two weeks will be assessed  
 5362 by a clinician for eligibility and possible intervention.. The research staff member will contact a  
 5363 licensed clinician for evaluation. In the event that no clinician is available, staff will put the  
 5364 participant in contact with the National Suicide Prevention Lifeline at 1-800-273-8255. They will  
 5365 also contact the Study Coordinator and Site PI to inform them of the situation as soon as  
 5366 possible. Additionally, they will contact the Project Coordinator to inform her of the situation. The  
 5367 participant will be paid \$25 (+\$25 bonus if applicable) and provided with local mental health  
 5368 resources. Post enrollment, any report of suicidal ideation or attempt by a participant will be  
 5369 grounds for immediate withdrawal from the study.

### 5.6 Inclusion/Exclusion Criteria

#### Inclusion Criteria:

- 5370  
 5371  
 5372 1) Women ages 21-44 years who have < an Associates Degree,  
 5373 2) Report smoking ≥ 5 cigarettes per day for the past year,  
 5374 3) Provide an intake breath CO sample >8 ppm, (if ≤ 8 ppm, then urinary-cotinine strip must  
 5375 be positive)  
 5376 4) Be without current (within the past year) serious mental disorder that would interfere with  
 5377 study results or completion as determined by the licensed medical professional or PI,  
 5378 5) Be without current substance abuse/dependence other than nicotine,  
 5379 6) Be sufficiently literate to complete the research-related tasks,  
 5380 7) Be in good physical health without serious illness or change in health or medication in  
 5381 the past three months as determined by the licensed medical professional at each site  
 5382 8) Have appropriate equipment to complete face-to-face video assessments and use ico  
 5383 Smartphone Smokerlyzer Monitors. For those who do not have a Smartphone, staff will  
 5384 explore potential alternate plans (e.g., project-provided inexpensive Android phone)  
 5385

#### Exclusion Criteria:

- 5387 1) Exclusive use of roll-your-own cigarettes;  
 5388 2) Planning to quit smoking in the next 30 days;  
 5389 3) A quit attempt in the past 30 days resulting in greater than 3 days of abstinence;  
 5390 4) Significant use of other tobacco or nicotine products within the past month (more  
 5391 than 9 days in the past 30).  
 5392 5) Currently taking anticonvulsant medications including:  
 5393 a. Phenytoin [Brand Name: Dilantin]  
 5394 b. Carbamazepine [Brand Name: Tegretol, Carbatrol, Equetro, Epitol]  
 5395 c. Oxcarbazepine [Brand Name: Trileptal]

- 5396 d. Primidone [Brand Name: Mysoline]  
5397 e. Phenobarbital  
5398 6) Positive toxicology screen for any of the following drugs: cocaine, opiates, methadone,  
5399 oxycodone, buprenorphine, benzodiazepines, barbiturates, amphetamines,  
5400 methamphetamines, MDMA and PCP will be grounds for exclusion.  
5401 a. Marijuana will be tested for but will not be an exclusionary criterion. Participants  
5402 will be discouraged from smoking marijuana during the study.  
5403 b. Participants with valid prescriptions for opiates, benzodiazepines, barbiturates, or  
5404 amphetamines will not necessarily be excluded.  
5405 c. Participants failing the toxicology screen will be allowed to re-screen once. These  
5406 participants will need to be re-consented before being rescreened to ensure they  
5407 have received adequate informed consent.  
5408 7) Self-report of binge drinking alcohol (more than 9 days in the past 30 days, 4/5 drinks in  
5409 a 2 hour period in females/males);  
5410 8) Systolic blood pressure < 90 or ≥ 160 mmHg;  
5411 a. Participants failing for blood pressure will be allowed to re-screen once.  
5412 9) Diastolic blood pressure < 50 or ≥ 100 mmHg;  
5413 a. Participants failing for blood pressure will be allowed to re-screen once.  
5414 10) Breath CO > 80 ppm;  
5415 11) Heart rate is greater than or equal to 115 bpm or less than 45 bpm;  
5416 a. Participants failing for heart rate will be allowed to re-screen once.  
5417 12) Currently seeking treatment for smoking cessation;  
5418 13) Being pregnant or nursing, or not report using an approved form of birth control if  
5419 applicable determined by the Project Medical Director.  
5420 14) Have used nicotine replacement, bupropion or other pharmacotherapies as cessation  
5421 aids in the past month (bupropion will be allowed for treatment of depression);  
5422 15) Current symptoms of psychosis, dementia or mania;  
5423 16) Suicidal ideation in the past month (score > 1 on the BDI question 9 or endorse question  
5424 4 and/or 5 on the MINI suicide subscale);  
5425 17) Reporting a plan or attempt to commit suicide, which is assessed on question A3g of the  
5426 MINI Neuropsychiatric Interview Major Depressive Episode Module. Thoughts of suicide  
5427 without an intent or plan is not an exclusion criteria;  
5428 18) Suicide attempt in the past 6 months (endorse question 6 on the MINI suicide subscale  
5429 with suicide attempt in the past 6 months);  
5430 19) Participation in another research study in the past 30 days;  
5431 20) Daily use of e-cigarettes in the past month (defined as 6 – 7 days per week); or  
5432 21) Co-habitation with any research participant who has or is participating in the current  
5433 study.  
5434 22) Oxygen saturation of < 90%  
5435 23) Reporting positive symptoms for COVID19  
5436

5437 Women with academic degrees greater than high school are excluded because they have a  
5438 lower risk of smoking and thus are not of interest in this experiment on smoking among  
5439 socioeconomically disadvantaged women. Individuals under age 21 are excluded because they  
5440 cannot legally buy cigarettes. Those with unstable medical, psychiatric, or medication conditions  
5441 (as determined by the licensed medical professional) are excluded as these symptoms could  
5442 affect a participant's ability to complete the study. Examples include but are not limited to the  
5443 following: angina, stroke, heart attack which occurred since phone screening, blood clots in the  
5444 arms or legs for which the individual is undergoing active medical treatment, cancer requiring  
5445 active chemotherapy or radiation therapy, severe shortness of breath caused by conditions such  
5446 as uncontrolled asthma, COPD, or arrhythmia, active untreated infection such as pneumonia,  
5447 active untreated endocrine disorder such as hyperthyroidism. We will exclude those currently  
5448 seeking smoking treatment and those who plan to quit in the next 30 days, as participation in this  
5449 study may not lead to reductions in smoking. We will exclude pregnant or nursing women and

women of reproductive potential who are unwilling to use acceptable forms of birth control throughout the study if applicable determined by the if applicable determined by the Project Medical Director. We will also exclude anyone with current or recent alcohol or drug abuse problems as these factors could independently affect smoking behavior during the study. Individuals with baseline CO readings greater than 80 ppm, those with heart rate or blood pressure readings that are out of range (systolic: 90-159 mmHg; diastolic: 50-99 mmHg; HR: 45-114 bpm) and anyone who has attempted suicide in the past six months will be excluded from the study for safety concerns. Individuals who smoke 'roll your own' cigarettes exclusively will be excluded from the study because we will be unable to standardize their baseline smoking behavior. Individuals who have reported daily use of e-cigarettes in the past 30 days will be excluded as they may not be compliant with experimenter-provided e-cigarettes. Individuals who have recently participated in a research study will be excluded as participation may have changed their smoking patterns, which may preclude a stable smoking baseline. Because participants are required to complete portions of the protocol independently, they will need to be able to independently read and comprehend the study materials.

### **5.7 Eligibility Determination:**

The research assistant will review the entire screening assessment battery for initial eligibility determination, confirming the participant meets the above described inclusion/exclusion criteria. All eligibility criteria that are not related to physiological measurements will be assessed during the first portion of the screening visit, and all criteria related to physiological measurements will be determined during the second portion of the screening. The final eligibility of the participant will be determined by a licensed medical professional (MD, DO, NP, PA, Master's prepared RN or CRN) at each site after reviewing the Medical History Questionnaire, BDI, Mini Neuropsychiatric Interview, and the MINI suicide subscale. The licensed medical professional may meet with a participant if available and think it necessary for eligibility determination. He/she will sign off on eligibility prior to the first baseline visit. If the licensed medical professional determines the participant is not medically eligible to participate in the study, has current symptomatology that would interfere with interpretation of the data, or is unlikely to complete the study he/she will inform the research assistants who will contact the participant prior to the first baseline visit. The licensed medical professional will not need to review the medical history forms of participants who are ineligible for other, non-medical reasons.

If a participant fails the urine or saliva toxicology screen due to a prescription medication he/she is taking, then he/she will not be automatically excluded. The interviewer will make note of this when he/she submits the forms to the licensed medical professional for final eligibility determination.

Once all the screening procedures have been completed, researchers will pay participants \$25 (+\$25 bonus if applicable) for their time as long as they pass the drug tests and meet the minimum requirements for carbon monoxide or urinary cotinine levels. Participants will be paid after the completion of the study visit. If participants are deemed ineligible at any point in the screening, the participant will be paid after determined ineligible. Marijuana will be tested for but will not be an exclusionary criterion. If a participant does not pass the drug test but has a current, valid prescription that would explain the failed test he/she will not be automatically excluded and will still receive the visit payment. Participants who meet all other eligibility criteria, sans the medical criteria, will be scheduled for the first baseline visit.

At the end of the screening session, the researcher will complete the End of Visit Evaluation Form. This will allow the researcher to make note of any problems encountered during the visit and to assess the truthfulness of the participant in regards to self-report of tobacco use.

## **6. Study Baseline Procedures**

This study will use a one-week, two-session baseline period to collect baseline individual difference measures and monitor daily usual-brand smoking behavior. At Baseline 1 or within 1 business day of the Baseline 1 visit, participants will be provided their usual brand cigarettes to

5504 smoke, equivalent to 150% of their daily smoking rate. Participants will be encouraged to  
5505 come to the lab to pick up their usual brand cigarettes after they complete the  
5506 questionnaires and physio for the BL1 visit. Those who cannot come to the lab will  
5507 receive product via a commercial courier. A timeline follow back (TLFB) will be used during  
5508 the period between Baseline 1 and Baseline 2 to assess the daily cigarette use for the first 7  
5509 days the participant has product. The participant must have received their UB cigarettes from the  
5510 lab before the 7-day assessment period starts, and Baseline 2 must occur at least 7 days after  
5511 the participant receives their usual brand cigarettes from the lab. If the baseline period extends  
5512 past seven days and if the participant has run out of product, participants will need to purchase  
5513 their own usual brand cigarettes. Use of a two-session baseline period will ensure stability of  
5514 daily smoking reports, reduce reactivity to the daily cigarette monitoring, and reduce participant  
5515 burden. During the two baseline sessions, participants will complete subjective questionnaires.  
5516 Each visit will last approximately two to four hours. At the end of each baseline session, the  
5517 researcher will complete the End of Visit Evaluation Form. This will allow the researcher to make  
5518 note of any problems encountered during the visit and to assess the truthfulness of the  
5519 participant in regards to self-report of tobacco use. Participants will also be supplied with urine  
5520 collection equipment during the Baseline 1 product exchange so that they can collect first  
5521 void urine samples during the Baseline 2 visit.

5522 For the Baseline 1 visit and all subsequent visits, the participant will be sent a REDCap  
5523 link within 15 minutes of the start of the scheduled visit to complete all of the non-  
5524 interviewer administered questionnaires. The participant will complete these  
5525 questionnaires on their own but can have the research assistant present on a video call if  
5526 they desire. Before beginning the physiological assessment portion of the visit over video  
5527 call, the research assistant must review the participant's questionnaire responses for that  
5528 visit. Participants will be compensated after the completion of the study visit and when  
5529 the participant has received their new product.

5530 At Baseline 2 and all subsequent visits, after the participant has answered the  
5531 questionnaires and has completed the physiological portion of the visit over video call,  
5532 participants will be asked to come to the lab for exchange of product and biological  
5533 samples. Participants will bring in their used and unused product from the previous visit  
5534 as well as a first-void urine sample for assessing tobacco-related toxin exposure for  
5535 assessing nicotine metabolism rate on applicable visits (BL2, Week 8 and Week 16)  
5536 using equipment that was provided at the previous visit. Participants will be instructed to  
5537 call the RA at the office when they get to the clinic to ensure that there is enough space  
5538 in the smoking chambers to house all participants while abiding by safety guidelines as  
5539 detailed on page 14 of the protocol. All participants must pass a COVID19 screening before  
5540 entering the building. When invited into the lab, the participant will be shown to a smoking  
5541 chamber and will instructed to place their bag of product outside of the chamber. The  
5542 participant will wait here while the RA processes and returns product through the  
5543 randomization database. Then the RA will dispense new product and bring the bag back  
5544 to the participant. When the RA deems it safe for the participant to exit the chamber, the  
5545 RA will instruct the participant that they can leave. The RA will instruct the participant to  
5546 observe social distancing measures during this exchange, providing clarification if  
5547 necessary. If a participant forgets their first-void urine sample at the Baseline 2 visit, staff  
5548 will ask participant to come back to the clinic with their first void urine sample before  
5549 exchange of product occurs. If participant is unable to return to the clinic with their first  
5550 void sample, staff can arrange to meet the participant off campus to pick up their urine  
5551 sample and to give participant their study product. Distancing and safety measures as  
5552 described above must be observed. For participants who cannot make it to UHC, special  
5553 arrangements will be made to enable use of the randomization database and product  
5554 return/distribution procedures to the extent possible. Each week, during - or scheduled



5555 as nearly as possible to – a virtual visit, a complete accounting of the participant's  
5556 product inventory will be taken and processed remotely through the randomization  
5557 database. The participant will separate product based on its type (e-cigarette or  
5558 combustible inventory) and status (used/unused), and the RA will process return  
5559 characteristics through the database accordingly. The RA will clarify barcode  
5560 characteristics with the participant when legibility is compromised. The participant will  
5561 be instructed to keep unused product in their possession, but to exchange any used  
5562 product with the courier who will deliver newly dispensed replacement products within 48  
5563 hours.

5564 Product that will be given to participants for the Baseline 2 visit cannot be given/sent  
5565 to participants until 7 days have passed following completion of the Baseline 1 visit. We  
5566 will need to calculate baseline smoking rate during this 7-day period and so participants  
5567 cannot have access to any blinded study product or e-cigarettes before this 7-day period  
5568 has ended.

### 5569 5570 **6.1 Visit scheduling requirements for baseline period:**

5571 Participants will be required to schedule the Baseline 1 visit within 30 days of the completion  
5572 of their screening visit. If a participant still wants to be in the study after 30 days, he/she will need  
5573 to be re-screened. The participant will need to be re-consented but will maintain the original  
5574 REDCap Subject Identifier. The ideal target window separating Baseline 1 and Baseline 2 is  
5575 between 7 and 12 days. The minimum is 7 days and the maximum is 21 days. If the participant  
5576 does not complete the visit within 21 days, then he/she will not be rescheduled and will be  
5577 discontinued from the study.

### 5578 5579 **6.2 Measures/Assessments**

5580  
5581 **The following physiological measures will be collected and recorded directly into REDCap**  
5582 **by the interviewer:**

- 5583 1) CO
- 5584 2) Blood Pressure
- 5585 3) Heart Rate
- 5586 4) Body temperature
- 5587 5) Oxygen saturation
- 5588 6) Respiratory rate
- 5589 7) Urine or Saliva Toxicology
- 5590 8) Urine Pregnancy test (if applicable, to be performed every 2 weeks)

5591  
5592 **The following assessments will be administered as an interview at Baseline 1 and entered**  
5593 **directly into REDCap by the interviewer:**

- 5594 1) Concomitant Medications Form
- 5595 2) Health Changes Questionnaire, which will assess any weekly health changes,
- 5596 3) Time Since Last Cigarette Questionnaire

5597  
5598  
5599 **The following Baseline 1 assessments will be completed by the participant directly in**  
5600 **REDCap:**

- 5601 1) BDI
- 5602 2) OASIS
- 5603 3) COVID19 Symptom Questionnaire
- 5604 4) Respiratory Symptom Questionnaire
- 5605 5) Wisconsin Inventory of Smoking Dependence Motives-Brief Scale (WISDM) will be  
5606

- administered to assess nicotine dependence severity.
- 6) Perceived Health Risks Rating<sup>78</sup>, a measure of the perceived addictive potential and other health risks associated with cigarettes;
  - 7) Perceived Stress Scale (PSS)<sup>78</sup>, assessing the degree to which life situations are perceived as stressful;
  - 8) Positive and Negative Affect Scales (PANAS)<sup>79</sup>, a measure of changes in positive and negative mood;
  - 9) Respiratory Health Questionnaire, a UVM measure of cough, shortness of breath and other respiratory symptoms;
  - 10) Minnesota Nicotine Withdrawal Scale (MNWS)<sup>80</sup>, a measure of nicotine withdrawal;
  - 11) Questionnaire of Smoking Urges-brief scale - Usual Cigarette (QSU)<sup>81</sup>, which measures the urge to smoke;
  - 12) Vaping Craving Questionnaire (VCQ)<sup>82</sup>, which measures the urge to vape;
  - 13) Cigarette Evaluation Scale – Usual Cigarette (CES)<sup>83</sup>, which measures responses to cigarettes (e.g., reward, satisfaction);
  - 14) Vaping Evaluation Scale (VES), which measures responses to vaping (e.g. reward, satisfaction)
  - 15) Cigarette Purchase Task – Usual Brand Version (CPT)<sup>84</sup>, a self-report analogue of a progressive-ratio schedule that measures the relative reinforcing efficacy of cigarettes by querying how many of that day's cigarette they would consume in a day at varying prices. This task will indicate whether prolonged VLNC cigarette use reduces cigarette demand and increases sensitivity to increases in cigarette costs;

All participants will also be asked to select their top three flavors of e-cigarette liquid from a list read to them by the RA. This question will be asked in preparation for giving flavored pods to participants who are randomized into the flavored e-cigarette condition. This information will be recorded directly into REDCap. Participants will be asked to rate these top three flavors based on either previous experience with these flavors or to indicate how much they believe that they will like or dislike the flavors.

**The following Baseline 2 physiological measures will be collected and recorded directly into REDCap by the interviewer:**

- 1) CO
- 2) Blood Pressure
- 3) Heart Rate
- 4) Body temperature
- 5) Oxygen saturation
- 6) Respiratory rate
- 7) Urine or Saliva Toxicology
- 8) Urine Pregnancy (if applicable; to be performed every 2 weeks)

**The following assessments will be administered as an interview at Baseline 2 and then entered directly into REDCap by the interviewer:**

- 1) Concomitant Medications Form
- 2) Health Changes Questionnaire
- 3) Time Since Last Cigarette Questionnaire

**The following assessments will be administered at Baseline 2 and completed by the participant directly in REDCap:**

- 1) BDI
- 2) OASIS
- 3) COVID19 Symptom Questionnaire
- 4) Respiratory Symptom Questionnaire
- 5) MNWS
- 6) WISDM

- 5661 7) PANAS  
5662 8) QSU (usual brand)  
5663 9) Vaping Craving Questionnaire  
5664 10) CES (usual brand)  
5665 11) Vaping Evaluation Scale  
5666 12) CPT (usual brand)  
5667 13) E-cigarette flavor rating questionnaire  
5668 a. Participants will rate only the flavors that they received from staff for this visit  
5669

5670 In the event that the REDCap website is not functioning, the assessments will be  
5671 administered aloud and participant answers will be recorded securely. The interviewer will enter  
5672 the data into REDCap when it resumes functioning properly. This information should be recorded  
5673 in the 'End of Visit Evaluation Form'.  
5674

### 5675 **6.3 E-cigarette Training Session (Baseline 2):**

5676 Participants assigned to an e-cig condition will be told that they will be provided with a JUUL.  
5677 If a participant indicates an unwillingness to use the JUUL device, the research assistants will  
5678 offer the participant the Vuse Solo as alternative device. If the participant does not wish to use  
5679 either device, he or she would be ineligible for the study.

5680 Participants in the e-cigarette conditions will be given e-cigarette pods BEFORE the training  
5681 session occurs. These pods will be either picked up at the lab (preferred) or delivered to the  
5682 participant 1 to 2 days before their Baseline 2 visit occurs. Participants randomized to the e-  
5683 cigarette conditions will be notified before their Baseline 2 visit (but after the 7-day period  
5684 following Baseline 1) and informed of their e-cigarette condition. Participants randomized to the  
5685 flavored condition will be given pods of up to three flavors of their choice. Staff will calculate how  
5686 many total pods participants will be given at this time based on their smoking rate, and  
5687 participants will be able to choose the proportion of each flavor that they would like to receive.

5688 The e-cigarette training session will occur over video chat after the physiological  
5689 measurements have been collected. The first 30 minutes of the training session will consist of the  
5690 participant being taught how to use, charge, and replace pods. Participants will first try their JUUL  
5691 using the tobacco flavor. At this point, participants who are in the tobacco-only flavor condition  
5692 will conclude their training session.

5693 For all visits following Baseline 2, participants in the preferred flavor condition are permitted  
5694 to take up to three flavors home per week but can choose to take less than three flavors if  
5695 desired. Participants will take home their chosen pods (or cartridges) of up to three flavors.  
5696 Participants will be able to change their flavors at only one point in the study if they desire.  
5697 Participants will only be allowed to take home three flavors at one time. Participants will be given  
5698 an E-cigarette instructional manual that reviews the e-cigarette training done at this visit.  
5699 Participants will be encouraged to call with any device issues.

### 5700 **6.4 Interactive Voice Response System:**

5701 At the end of the first baseline visit, participants will be trained to use the Interactive Voice  
5702 Response (IVR) System, which will contact participants each day throughout the study and ask  
5703 about their smoking behavior as well as withdrawal symptoms the week before and after  
5704 Baseline 2. We will also review the IVR adherence incentive program, which consists of \$1 per call  
5705 plus a \$10 bonus for seven consecutive calls.

5706 The IVR system is operated by TeleSage (<https://telesage.com/about/>). To be enrolled in the  
5707 IVR system, research staff will enter the participant's initials, telephone number, subject  
5708 identifier, and visit dates into the IVR TCORS website. Identifying information (initials and  
5709 telephone numbers) will not be extracted as part of the data by the bioinformatics group. Please  
5710 refer to TeleSage's privacy statement and HIPAA compliance form for additional information.  
5711

### 5712 **Baseline 2 biological specimens:**

5713 Urine sample for smoking biomarker assessment:

5714 Participants will be asked to provide a urine sample (first void of the day) at the second  
5715 baseline session and to post-randomization weeks 8 and 16 for biomarker assessment.  
5716 Biomarker analysis will provide nicotine and carcinogen exposure outcome measures and verify  
5717 compliance with VLNC cigarettes. Samples will be stored at -80C. Urine samples will be  
5718 analyzed for total nicotine (cotinine plus its glucuronide conjugate, a useful measure of daily  
5719 nicotine exposure), the tobacco-specific nitrosamine 4-methylnitrosamine-1-(3-pyridyl)-1-  
5720 butanol (NNAL), and metabolites of 4 polycyclic aromatic hydrocarbons (PAHs), which are  
5721 biomarkers of tobacco smoke carcinogens and decrease upon tobacco cessation or reduction.  
5722 Anatabine is a minor alkaloid that is reduced in users of VLNC cigarettes and e-cigs. Therefore,  
5723 anatabine levels in samples from those assigned to the VLNCC, VLNCC+TF e-cig and  
5724 VLNCC+PF e-cig conditions should be lower than levels from those in the NNCC condition.  
5725 These analyses will be performed by the Murphy lab at the University of Minnesota.

5726 **Biomarker shipping and storage:**

5727 Biomarkers will be shipped quarterly to the University of Vermont Laboratory for Clinical  
5728 Biochemistry Research (Tracy Lab). The Tracy Lab will serve as a central repository for all  
5729 biomarker specimens and will be responsible for distributing specimens to the appropriate labs  
5730 on a quarterly basis. Urine samples will be analyzed and stored at the University of Minnesota  
5731 Murphy Lab.  
5732

5733 **7. Study Experimental Procedures**

5734 **7.1. Experimental Period:**

5735 Participants will be seen weekly throughout the 16-week experimental period. Weeks 4, 8,  
5736 12, 16 and the abstinence visit will take approximately 2-4 hours each. All other sessions will last  
5737 approximately 2 hours. If a participant has a positive urine or saliva toxicology test or is visibly  
5738 intoxicated as determined by slurred speech, swaying, or stumbling, the session will be  
5739 rescheduled until a negative test result is obtained and intoxication is not present. As a part of  
5740 each experimental visit, participants will be asked to come to UHC for a product exchange. All  
5741 participants must pass a COVID19 screening before entering the building. Participants will be  
5742 instructed to contact the RA at the office when they get to the clinic to ensure that there is  
5743 enough space in the smoking chambers to house all participants while abiding by safety  
5744 guidelines as detailed on page 14 of the protocol. All participants must pass a COVID19  
5745 screening before entering the building. When invited into the lab, the participant will be shown to  
5746 a smoking chamber and will be instructed to place their bag of product outside of the chamber. The  
5747 participant will wait here while the RA processes and returns product through the randomization  
5748 database. Then the RA will dispense new product and bring the bag back to the participant's  
5749 smoking chamber and leave it on the ground in front of the chamber. When the RA deems it  
5750 safe for the participant to exit the chamber, the RA will instruct the participant that they can  
5751 leave. The RA will instruct the participant to observe social distancing measures during this  
5752 exchange, providing clarification if necessary. At the end of each experimental session, the  
5753 researcher will complete the End of Visit Evaluation Form, which will be filed in the participant's  
5754 binder. This will allow the researcher to make note of any problems encountered during the visit  
5755 and to assess the truthfulness of the participant in regards to self-report of tobacco use and  
5756 compliance to study procedures.

5757 **Visit scheduling requirements for experimental period:**

5758 The ideal scheduling window between each visit is 7 days based on the date of the Baseline  
5759 2 Visit. For additional scheduling requirements, refer to the '*Scheduling Visits SOP*'. If a  
5760 participant misses a visit and is unable to reschedule during the window ( $\pm 3$  days), that visit will  
5761 not be 'made-up' in the future. All measures that were not completed will be considered missing  
5762 data and will not be collected during future visits. If a visit mistakenly occurs outside of the  
5763 designated window, this is a protocol deviation. A 'Non-Medical Event Form' will need to be  
5764 completed. Additionally, each visit should occur at approximately the same time of day  $\pm 2$  hours.

5765 If a participant is not able to attend his/her Week 16 visit, then it should be rescheduled even if it  
5766 is outside of the scheduling window. This will be documented as a protocol deviation.

## 5767 **7.2. Experimental Visits Weeks 1, 3, 5, 7, 9, 11, 13, and 15 Procedures**

### 5768 **7.2.A. Measures/Assessments**

5769 **Physiological Measures Collected and entered directly into REDCap by the interviewer:**

- 5770 1) CO
- 5771 2) Blood Pressure
- 5772 3) Heart Rate
- 5773 4) Body temperature
- 5774 5) Oxygen saturation
- 5775 6) Respiratory rate
- 5776 7) Urine or Saliva Toxicology
- 5777 8) Urine Pregnancy test (if applicable, to be performed every 2 weeks)

5778 **The following assessments will be administered as an interview and entered directly into**  
5779 **REDCap by the interviewer:**

- 5780 1) Concomitant Medications
- 5781 2) Medical Event Form, if applicable
- 5782 3) Health Changes Questionnaire
- 5783 4) Time Since Last Cigarette Questionnaire

5784 **The following assessments will be completed by the participant directly in REDCap:**

- 5785 1) BDI
- 5786 2) OASIS
- 5787 3) COVID19 Symptom Questionnaire
- 5788 4) Respiratory Symptom Questionnaire
- 5789 5) MNWS

5791 In the event that the REDCap website is not functioning, the assessments will be  
5792 administered aloud and participant answers will be recorded securely. The interviewer will enter  
5793 the data into REDCap when it resumes functioning properly. This information should be  
5794 recorded in the 'End of Visit Evaluation Form'.

## 5795 **7.3. Experimental Visits Weeks 2, 4, 6, 8, 10, 12, 14, and 16 Procedures:**

### 5796 **7.3.A Measures/Assessments**

5797 **Physiological measures collected and entered directly into REDCap by interviewer:**

- 5798 1) CO
- 5799 2) Blood Pressure
- 5800 3) Heart Rate
- 5801 4) Body Temperature
- 5802 5) Oxygen Saturation
- 5803 6) Respiratory rate
- 5804 7) Urine or Saliva Toxicology
- 5805 8) Urine Pregnancy test (if applicable)

5806 **The following assessments will be administered as an interview and will be entered into**  
5807 **REDCap by the interviewer at the end of the visit:**

- 5808 1) Concomitant Medications

- 5809 2) Medical Event Form, if applicable  
 5810 3) Health Changes Questionnaire  
 5811 4) Time Since Last Cigarette Questionnaire

5812 **The following assessments will be completed by the participant directly in REDCap:**

- 5813 1) BDI  
 5814 2) OASIS  
 5815 3) COVID19 Symptom Questionnaire  
 5816 4) Respiratory Symptom Questionnaire  
 5817 5) MNWS  
 5818 6) QSU (usual brand)  
 5819 7) QSU (study cigarette)  
 5820 8) Vaping Craving Questionnaire  
 5821 9) CES (usual brand)  
 5822 10) CES (study cigarette)  
 5823 11) Vaping Evaluation Scale  
 5824 12) PANAS  
 5825 13) Cigarette Purchase Task - Usual Brand Cigarette Version (weeks 4, 8, 12 and 16  
 5826 only)  
 5827 14) Cigarette Purchase Task – Study Cigarette Version (weeks 4, 8, 12 and 16 only)  
 5828 15) Cross-price Elasticity Task<sup>84</sup>- e-cigarettes and combustible cigarettes (weeks 4, 8, 12  
 5829 and 16 only) (for e-cigarette experimental conditions only)  
 5830 16) Penn State Electronic Cigarette Dependence Index (weeks 8 and 16 only)  
 5831 17) Respiratory Health Questionnaire (weeks 8 and 16 only)  
 5832 18) FTND (weeks 8 and 16 only)  
 5833 19) Perceived Health Risks Questionnaire (weeks 8 and 16 only)  
 5834 20) Smoking Stages of Change Algorithm and Contemplation Ladder (weeks 8 and 16  
 5835 only)  
 5836 21) WISDM – Brief Scale  
 5837 22) Drug Use Questionnaire – 1 month version (weeks 8 and 16 only)  
 5838 23) Perceived Stress Scale (weeks 8 and 16 only)  
 5839 24) Alcohol Use Questionnaire – 1 month version (weeks 8 and 16 only)  
 5840 25) E-cigarette flavor rating questionnaire (weeks 4, 8, 12 and 16 only)  
 5841 a. Participants will rate only of the flavors that they have been using over the  
 5842 past week and that have been dispensed by study staff.  
 5843

5844 In the event that the REDCap website is not functioning, the assessments will be  
 5845 administered aloud and participant answers will be recorded securely. The interviewer will enter  
 5846 the data into REDCap when it resumes functioning properly. This information should be recorded  
 5847 in the 'End of Visit Evaluation Form'.  
 5848

5849 **Biological Samples to be collected:**

- 5850 1) First void urine sample (Weeks 8 and 16 only)  
 5851

5852 **7.4. Interactive Voice Response System:**

5853 Participants will continue to use the IVR system on a daily basis throughout the experimental  
 5854 period to record the number of study cigarettes smoked per day, measurement of e-cig use and  
 5855 use of non-study cigarettes or other tobacco products. Measurement of e- cig use will be  
 5856 collected by asking two questions: how many daily e-cigarette episodes occurred, where one  
 5857 episode consists of around 10-15 puffs or up to approximately 10 minutes, and what proportion  
 5858 of pods and/or cartridges were used per day. Participants will also be asked to log how many  
 5859 flavors of e-cigs they used per day. During the first week after Baseline 1, the IVR system will  
 5860 collect information about mood and withdrawal symptoms.  
 5861

5862  
5863  
5864  
5865  
5866  
5867  
5868  
5869  
5870  
5871  
5872  
5873  
5874  
5875  
5876  
5877  
5878  
5879  
5880  
5881  
5882  
5883  
5884  
5885  
5886  
5887  
5888  
5889  
5890  
5891  
5892  
5893  
5894  
5895  
5896  
5897  
5898  
5899  
5900  
5901  
5902  
5903  
5904  
5905  
5906  
5907  
5908  
5909  
5910  
5911  
5912  
5913  
5914  
5915

### **7.5. Variable Incentive Program:**

An incentive program has been developed with the goal of improving attendance at scheduled assessment sessions, compliance with using only study-provided tobacco products, and encouraging honest self-reports regarding all nicotine/tobacco use.

Briefly, participants will receive a total of seven tickets for each weekly visit they attend after randomization (Visits 03-18, weeks 1-16). In total, participants could earn 112 valid tickets across the 16 visits. Participants will be instructed that these tickets correspond to attendance (one ticket), honest reporting (one ticket), compliance in bringing back used and unused pods/cartridges (two tickets) and adherence to using only the assigned study product (three tickets). Participants who do not bring back all of their unused study product and used packaging will be told that they may not be eligible to earn the two compliance tickets. Participants will be further instructed that all of the tickets that they receive “could” be eligible for entry into a monthly drawing for prizes, but that only tickets that are “validated” will be eligible for prizes.

Since it is prohibitively expensive to test urine samples each week for each participant and because it is currently not feasible to detect with reasonable precision non-compliance based on biomarkers in the two higher nicotine group, we plan to only validate the attendance tickets. Hence, each participant who attends their regularly scheduled weekly session will have a total of seven validated tickets entered into the monthly drawing.

To convey the message that we may be validating honest reporting and use of only study-provided products, in a bogus pipeline of sorts, we will tell the participants that a composite assessment of the measures that we collect MAY be used to validate the amount of nicotine and tobacco products that they are using. So there is some minor deception involved, but technically we could conduct urine toxicology testing for both purposes. Hence, if the urine toxicology testing is presented as something that MAY be done for validation purposes, we feel that any deception is relatively minor. For scientific/economic reasons we are just electing to restrict validation to attendance. Nevertheless, we will debrief all participants upon the completion of the trial. We will inform them that the incentive program was based exclusively on attendance due to the relatively high cost of urine toxicology testing and other practical problems with shipping the urines for prompt testing.

Drawings will be conducted on the 1st of each month. Validation will be performed by staff who have no participant interaction and are not blind to condition. Any ticket drawn will be eligible for an incentive as the only true contingency is for attendance. There will be no mention of the basis for earning incentives (i.e., whether the ticket was for attendance, honesty, adherence). Participants will simply be informed that he or she earned an incentive from the drawing.

Each drawing will be independent (without replacement); consequently, some participants will not win a prize and others may win more than one during the study if more than one of their tickets is drawn. After confirming winners, the remaining tickets from each month will be discarded (i.e., tickets will only be entered into one drawing). The monthly prize amounts are detailed below.

We estimate based on the 2 ½ years we think it will take to complete this study, that participants will win an average of approximately \$65 in prizes or an additional \$5.50 per week per participant.

Grand Prize (1): \$500 cash

Second Prize (1): \$200 cash

Third Prize (5): \$10 cash

### **7.6. Product and Procedures Compliance Review Sessions:**

At each visit, Baseline 2 through Week 16, participants will be counseled about their use of the study cigarettes and assigned e-cigarette (if applicable). Participants will be asked about any concerns or obstacles associated with use of the study cigarettes and assigned e-cigarette (if applicable). The importance of honest self-reporting will be stressed. Participants will be told that they will not be penalized for use of other nicotine or tobacco products and that it is crucial for them to report any use of these products. If difficulties are encountered, participants will be

5916 asked why they think they are experiencing difficulties (e.g., taste, withdrawal symptoms) and to  
5917 problem-solve how to deal with these difficulties in order to meet the protocol requirements.  
5918 Additionally, participants will be counseled about their IVR completion, visit attendance, task  
5919 engagement and product accountability. Refer to the '*Product and Procedures Compliance*  
5920 *Review Sessions SOP*' for more information.

### 5921 **7.7. Quit Attempts During the Study Protocol:**

5922 At each weekly session, we will ask each participant if s/he is currently abstaining from  
5923 smoking with the intention of quitting and whether s/he is planning to quit smoking prior to his/her  
5924 next scheduled visit. If a participant is currently abstaining from smoking with the intention to quit,  
5925 we will encourage the participant to continue abstaining, schedule them for weekly visits , and  
5926 provide them with NCI's Clearing the Air manual and local smoking cessation resources. We will  
5927 give them the option of taking study product(s) home but not require that they take them, and if  
5928 they do take the product(s) home we will suggest that they put the product(s) away at home so as  
5929 to remove these cues from view. We will ask the participant to contact staff if they lapse and  
5930 would like to receive study product(s) prior to his/her next visit. If a participant is planning to quit  
5931 but has not initiated a quit attempt, we will ask if s/he has identified a quit date and if so what the  
5932 date is, provide them with the Clearing the Air manual and local smoking cessation resources,  
5933 provide them with the study product(s), and recommend that they put the product(s) away out of  
5934 view on the quit date.

5935 For those in a condition including e-cigarettes, we will defer to the participant's interests in  
5936 continuing to use e-cigarettes as part of their quit attempt. Those who indicate that they will  
5937 continue to use them will be given their same weekly supplies base on their baseline smoking  
5938 rate. Those who indicate that they are planning to abstain from both combusted and non-  
5939 combusted tobacco, we will honor that request. As we state above about combusted cigarettes, if  
5940 participant changes his or her mind about resuming e- cigarette use, they can contact us and  
5941 obtain their weekly supply.

#### 5942 **7.7.A. If a participant is currently abstaining from smoking with the intention to quit:**

- 5943 • Encourage participant to continue abstaining from smoking
- 5944 • Schedule the participant for normal weekly visits
- 5945 • Provide the participant with the '*Clearing the Air*' manual and local smoking cessation  
5946 resources
- 5947 • Give the participant the option to receive product rather than require him/her to take  
5948 the product
- 5949 • If the participant choses to receive the study product have him/her sign a form  
5950 acknowledging that cigarette availability could be detrimental to the quit attempt.  
5951 Recommend that he/she put the product "away" at home as to avoid unwanted cues  
5952 to smoke.
- 5953 • If the participant chooses not to receive the study product, have him/her contact the  
5954 lab if he/she lapses and would like to pick up or be mailed the study product prior to  
5955 his/her next visit.

#### 5956 **7.7.B. If a participant is planning to quit smoking, but has not initiated the quit attempt:**

- 5957 • Ask if he/she has identified a target quit date and, if so, what that target date is
- 5958 • Provide the participant with the '*Clearing the Air*' manual and local smoking cessation  
5959 resources
- 5960 • Provide the participant with the study product as usual. Recommend that on the target  
5961 date he/she put the product "away" at home as to avoid unwanted cues to smoke.

### 5962 **7.8 Abstinence Assessment Session:**

5963 After the week 16 visit, participants will be required to attend one additional visit the following day.  
5964 During this visit, participants will have been encouraged to abstain from smoking until their next  
5965 scheduled visit (approximately 24 hours later). The abstinence assessment session should be  
5966



5967 scheduled no less than 18 hours and no more than 30 hours after the Week 16 visit. Abstinence  
5968 will be verified by an expired breath carbon monoxide level of 6 parts per million (ppm) or under.  
5969 This session will allow us to determine whether the experimental cigarettes and e-cigarette use  
5970 (for the e-cigarette conditions) have reduced the effects of abstinence on these measures relative  
5971 to the control conditions. If the participant does NOT meet abstinence criteria, he/she will only  
5972 receive \$20 for the visit.

## 5973 **7.8.A Participants Who Meet Criteria for Abstinence**

### 5974 **7.8.A.1 Measures/Assessments**

5975 **Physiological measures collected and entered directly into REDCap by the**  
5976 **interviewer:**

- 5977 1) CO
- 5978 2) Blood Pressure
- 5979 3) Heart Rate
- 5980 4) Body temperature
- 5981 5) Oxygen saturation
- 5982 6) Respiratory rate
- 5983 7) Urine or Saliva Toxicology

5984 **The following assessments will be administered as an interview and entered directly into**  
5985 **REDCap by the interviewer:**

- 5986 1) Concomitant Medications
- 5987 2) Medical Event Form, if applicable
- 5988 3) Health Changes Questionnaire
- 5989 4) Time Since Last Cigarette Questionnaire

5990 **The following assessments will be completed by the participant directly in REDCap:**

- 5991 1) BDI
- 5992 2) OASIS
- 5993 3) COVID19 Symptom Questionnaire
- 5994 4) Respiratory Symptom Questionnaire
- 5995 5) MNWS
- 5996 6) PANAS
- 5997 7) QSU-brief - Usual Cigarette
- 5998 8) QSU-brief - Study Cigarette
- 5999 9) Vaping Craving Questionnaire
- 6000 10) Cigarette Purchase Task - Usual Brand Cigarette Version
- 6001 11) Cigarette Purchase Task - Study Cigarette Version
- 6002 12) E-cigarette Purchase Task- E-cigarette Version

6003  
6004 In the event that the REDCap website is not functioning, the assessments will be administered  
6005 aloud and participant answers will be recorded securely. The interviewer will enter the data into  
6006 REDCap when it resumes functioning properly. This information should be recorded in the 'End  
6007 of Visit Evaluation Form'.

## 6008 **7.8.B. Participants Who Do Not Meet Criteria for Abstinence**

### 6009 **7.8.B.1 Measures/Assessments**

6010  
6011 **Participants who do NOT meet abstinence criteria will be required to complete the**  
6012 **following assessments:**  
6013  
6014

6015

- 6016 1) CO
- 6017 2) Blood Pressure
- 6018 3) Heart Rate
- 6019 4) Body temperature
- 6020 5) Oxygen saturation
- 6021 6) Respiratory rate
- 6022 7) Urine or Saliva Toxicology

6023 **The following assessments will be administered as an interview and entered directly into**  
6024 **REDCap by the interviewer:**

- 6025 1) Concomitant Medications
- 6026 2) Health Changes Questionnaire
- 6027 3) Medical Event Form, if applicable
- 6028 4) TLFB

6029 **The following assessments will be completed by the participant directly in REDCap:**

- 6030 1) BDI
- 6031 2) OASIS
- 6032 3) COVID19 Symptom Questionnaire
- 6033 4) Respiratory Symptom Questionnaire

#### 6034 **7.9 Participant Compensation:**

6035 Participants will receive \$25 plus a \$25 bonus for completing each screening visit on time as  
6036 scheduled. Payment for the first screening session will be made upon its completion. Payment for  
6037 the second screening session will be made regardless of enrollment as long as the participant  
6038 passes the drug test and meets the minimum requirements for carbon monoxide or urinary  
6039 cotinine levels. Participants who do not pass the drug test or who are visibly intoxicated as  
6040 determined by slurred speech, swaying, or stumbling will not be able to complete the visit and will  
6041 be asked to take another test several days after the first positive. If they are negative for the  
6042 second test, they will be eligible to participate, and if they are positive the for the second text they  
6043 will be excluded. Participants will receive \$100 for each study visit from Baseline 1 to Week 16.  
6044 Participants will also have a chance to earn an additional \$20 bonus for every study visit that is  
6045 completed on time as scheduled starting at Week 1 and ending at Week 15. Participants can  
6046 receive up to \$120.00 for the abstinence session (\$20 if participant does not achieve abstinence,  
6047 \$120 if participant reaches abstinence), \$40 for biochemical verification of abstinence at 30 day  
6048 follow up visit, and up to \$306 for completing daily IVR reports of study cigarette and other  
6049 nicotine and tobacco use. There will also be a \$150 bonus distributed at Week 16 for completing  
6050 the study.

6051 Participants who do not complete the entire study will receive compensation for the sessions  
6052 that they do complete. Total compensation for completing Study 3, including study visit  
6053 payments, daily IVR calls and end of study bonus is \$2816. As mentioned above, participants will  
6054 have a chance to earn additional incentives for compliance, honesty and attendance through  
6055 urine testing. Participants will be given a debit card at the beginning of the study (during the  
6056 second portion of the screening visit) and compensation for each visit will be automatically  
6057 transferred to the card after they complete that visit. If debit cards are unavailable, participants  
6058 will be paid via an alternate method (i.e. cash or check).

#### 6059 **7.10 End of Study:**

6060 After a participant has completed all study procedures and has been paid for participation the  
6061 research assistant will read the following script and give the participant the Clearing the Air  
6062 Manual.

6063 *“If you’ve reduced your smoking during this study, we encourage you to continue these*  
6064 *reductions or even consider quitting. We would like to provide you with some resources should*  
6065 *you decide to try to abstain from smoking (give “Clearing the Air” and hotline information). Please*  
6066 *also feel free to consult with your physician and use any medications he/she deems appropriate.*  
6067 *We will call you in approximately 30 days to ask about your smoking since leaving the study.*  
6068 *There is no right answer and we know how difficult quitting can be. Please just answer honestly.*  
6069 *The call will take less than 5 minutes. Thanks again for your participation.”*

6070 **The following assessments will be administered using REDCap:**

6071 1) End of Study Questionnaire

6072 **7.11 30 Day Follow up Phone Call:**

6073 Participants will receive a follow-up phone call or text between 25 and 35 days after the  
6074 abstinence assessment session to assess their smoking patterns. The phone questionnaire will  
6075 last less than five minutes. The questionnaire will ask if the participant is still smoking, how much  
6076 and whether he/she has attempted to quit smoking since the end of the study.

6077 Participants will receive 5 variable incentive program lottery tickets for completing the call as  
6078 compensation. Those who report abstinence will be invited to complete biochemical verification  
6079 and be compensated \$40 for doing so. Abstinence will be achieved by a carbon monoxide  
6080 reading of 6 parts per million (ppm) or under. A urine sample will may also be collected to be  
6081 sent to the lab for analysis. Additionally, any Medical Event Forms that remain open from the last  
6082 session will be discussed. If the participant became pregnant during the study, this would have  
6083 been recorded as a medical event. During this phone call, the research assistant will confirm her  
6084 due date. This event will remain open until delivery. At that time the licensed medical professional  
6085 will contact the participant to ask a few questions about the baby’s health and will update the  
6086 Medical Event Form.

6087 Once a participant has completed all study procedures and all open events have been closed,  
6088 the PI or Project Manager will review the participant’s record and sign a form indicating study  
6089 completion for that participant.

6090 **8.0 Study Randomization**

6092 **8.1 Randomization Process**

6093 The lead statistician will create a randomization schedule for each of the two sites, amounting  
6094 to 150% of expected enrollment at each site. The excess randomization codes will be used in the  
6095 event that a site will have to enroll extra participants due to unexpectedly slow enrollment at  
6096 another site. The nicotine doses will be identified by letter code and only Administrative Core  
6097 personnel with no participant contact will have the link between the statistician’s letter code and  
6098 dose assignments. There will be no blinding of e-cigarette conditions. The Administrative Core  
6099 will maintain the randomization schedule and the link between the alphabetic code and treatment  
6100 assignment securely. A second sealed copy will be secured in a separate building to protect  
6101 against loss related to fire or other unforeseen events.

6102 The University of Vermont will be responsible for removing all identifying information from  
6103 cigarettes received from the Research Triangle Institute (RTI), labeling each carton with a blind  
6104 code, assigning product using this blind code based on the randomization schedule being  
6105 provided by the UVM Biostatistics Core, and shipping cigarettes and e- cigarettes to each site as  
6106 needed based on recruitment. Each site will be responsible for tracking product received and  
6107 distributed to participants, collecting unused product from participants, and returning unused  
6108 cigarettes and e-cigarettes to UVM. The participants, investigators and study staff will not have  
6109 knowledge of which product is given to a participant or whether different participants received the  
6110 same or different product.

6111 **8.2 Study Product Administration**

6112 During the experimental period, participants will be provided with a 14-day supply of research

6113 cigarettes equivalent to 150% of their daily smoking rate. Those in the e-cigarette conditions will  
6114 also be provided with a 14-day supply of e-cigarettes equivalent to their daily smoking rate. This  
6115 rate will be calculated at Baseline 2 and will be an average daily smoking rate based on the IVR  
6116 data that reports on the usage for the first seven days following the day of the first baseline visit.  
6117 This will ensure adequate availability of cigarettes in the numerous locations participants may  
6118 typically keep a supply (home, work, vehicle, etc.) as well as avoid expending the entire supply if  
6119 they miss a scheduled visit. Participants will be instructed to use the research cigarettes for 16  
6120 weeks, at which point they are to discontinue product use.  
6121 If there is prior knowledge a participant will be missing a visit (i.e. planned vacation, laboratory  
6122 closure, etc.), then the participant will be provided with an adequate supply of cigarettes to make  
6123 up for the missed visit(s). The participant will be given a 21-day supply if one visit is going to be  
6124 missed and a 28-day supply if two visits are going to be missed.

### 6125 **8.3 Guidelines for Reporting other Nicotine Product Use**

6126 Participants will be asked to refrain from use of other non-study cigarettes during the study  
6127 period. If participants have to use another nicotine product, they will be told to use a non-  
6128 combustible product (gum, patch, etc.). Additionally, they will be told there is not a penalty for  
6129 use of non-study products, and that it is crucial for them to report any use of non- study tobacco  
6130 products. Throughout the baseline and experimental periods, an Interactive Voice Response  
6131 (IVR) system will be used on a daily basis to record the number of study cigarettes and non-  
6132 study cigarettes used the previous day. During the baseline and first experimental week,  
6133 participants will also answer daily IVR questions about their mood. Participants will be seen  
6134 weekly for assessments. Brief standardized review sessions focusing on compliance with the  
6135 study cigarettes and other study procedures will be provided at each visit.

### 6136 **8.4 Product Accountability:**

6137 Participants will be required to keep track of all the products provided to them. Therefore,  
6138 they will be instructed to return all unused products and empty cigarette packs e- liquid  
6139 pods/cartridges to the laboratory each week. Research staff will complete the 'Product  
6140 Accountability Log' as they process participants' product. Any discrepancies in the product  
6141 dispensed versus product returned will be discussed and recorded in the log. Research staff will  
6142 weigh all opened e-cigarette pods/cartridges that the participant returns at all visits to determine  
6143 how much e-liquid was used since the participant was last seen. Empty cigarette packs and e-  
6144 liquid pods/cartridges will not be saved. Unused cigarette packs and e-liquid pods/cartridges will  
6145 be re-distributed to the participants during Weeks 1-15. During Week 16, remaining unused  
6146 cigarettes and e-cigarette pods/cartridges returned by the participants will be collected by the  
6147 research staff.

6148 Participants who report running out of cigarettes or e-liquid pods/cartridges prior to a  
6149 scheduled weekly visit will be allowed to come in for an unscheduled visit to obtain more  
6150 research cigarettes. To determine whether a rate change for cigarettes is necessary, we will look  
6151 at the past two CO levels as compared to the Baseline 2 CO. If the CO trend is consistent with  
6152 the self-report of smoking all of the allotted cigarettes then a rate increase will be granted. The  
6153 participant will then receive cigarettes at a rate of 175% of their daily smoking rate. The  
6154 maximum increase is 200% of their daily smoking rate. To determine whether a rate change for  
6155 e-cigarettes is necessary, we will monitor the amount of e- cigarette use the participant is  
6156 reporting and showing through product return along with any unscheduled visits. The investigator  
6157 may grant an e-cigarette rate increase in increments of 25%. The maximum increase for e-  
6158 cigarettes will be 200% of their baseline weekly e- cigarette dispensation rate.

6159 If participants lose more than two packs of cigarettes and/or pods/cartridges and require an  
6160 unscheduled visit to the laboratory to supplement their supply, they will be told the next time they  
6161 lose more than two packs they will have to wait until their next scheduled appointment to receive  
6162 more cigarettes.

## 6163 **9. Study 3 Statistical Methods and Sample Size**

6164

## 9.1 Statistical Methods

Continuous outcomes will be summarized by mean, standard deviation, median and range. Categorical outcomes will be summarized by frequencies and percentages. Skewed continuous outcomes will be log- or square-root transformed as appropriate. Variables measured at each baseline visit will be averaged and the average will be used as the baseline measurement. As we expect conditions to be balanced on important baseline characteristics due to randomization, our primary analysis for all endpoints will not be adjusted for potential confounders. However, a secondary analysis will be completed for all outcomes adjusting for demographic characteristics (e.g., age) that we have found to be important in prior studies. Potential moderators (e.g., SSRI vs. non-SSRI antidepressant, depression vs. anxiety disorders, BMI above or below 30) will be explored by adding that term and the moderator-by-condition term to the model. We will examine age group and gender as potential moderators in a similar fashion.

Participants will be randomized in equal probability to one of the four conditions, with randomization stratified by site and menthol cigarette status. All analyses will follow the intent-to-treat principle (i.e. subjects will be analyzed according to condition assignment, regardless of compliance). The Primary Aim will examine the effects of condition on total CPD (study product and non-study product). CPD will be analyzed by week (mean over all days in a seven-day period) using a mixed model to account for repeated measures from the same individual. Models will include baseline CPD as a covariate. Using a mixed model also allows us to include the effect of study site as a random effect. Additional analyses conducted using data collected at the end of the study will use orthogonal comparisons to test for a linear trend in the decrease in CPD, such that VLNCC + PF e-cig > VLNCC + TO e-cig > VLNCC > NNCC, with the largest reduction in the VLNCC + PF e-cig condition. As we expect that differences among conditions for some of the outcomes may not follow a linear pattern, we will use related planned comparisons to test for threshold effects, specifically contrasting the NNCC condition to all three VLNCC conditions, and NNCC to the two VLNCC + e-cigarette conditions. Analysis of cigarette demand, smoke exposure and tobacco carcinogens (Aim 2) as well as additional outcomes, including subjective effects, will be analyzed in a similar manner. Because Exploratory Aim 3 is based on abstinence-induced effects and will be examined using data collected at a single visit at Week 17, analysis will be based on an analysis of co-variance model. In addition to the effect of condition, we will include important covariates noted above. Exploratory analyses will also be conducted combining data collected from three of the vulnerable populations (disadvantaged women of childbearing age, opioid dependent individuals, individuals with AD) to explore potential differences in effects of study condition across these populations.

This will be done with the addition of the effects of population and population-by-condition terms to the models described above. Study staff will make every effort to minimize missing data, and results of our ongoing trial suggest that this will be minimal. We will examine the missing data pattern, and if it is missing at random, will use all data available, without imputation.

## 9.2 Sample Size

Sample size was determined using NQuery Advisor based on hypothesis tests related to Aim 1, specifically to detect a significant difference between the study conditions (NNCC, VLNCC, VLNCC + TO e-cigs, VLNCC + PF e-cigs) on total CPD. The primary statistical approach will be repeated measures ANOVAs but required sample sizes were calculated focusing on expected outcomes at Week 16. This sample size estimate is intentionally conservative and calculated based on one outcome at one time point; however, given the repeated measures nature of our data, we will have correlated observations within subjects. Thus, with the given sample sizes we will achieve the stated power to detect differences of even lesser magnitude than stated or planned. Our sample size determination is based on preliminary results from our current trial

**Table 2. Observed effect sizes**

| <b>Outcome</b> | <b>Observed between-group ES (15.8 vs 0.4 mg/g)</b> |
|----------------|-----------------------------------------------------|
| CPD            | 0.70                                                |
| Craving        | 0.40                                                |
| FTND           | 0.12                                                |
| Breath CO      | 0.38                                                |

6219 and results from the Donny et al. study<sup>98</sup> of VLNC and NNC cigarettes. Note that the between-  
6220 group effect size is defined as the difference of study condition means divided by the common  
6221 standard deviation. A sample size of 53 participants per condition will provide 80% power to  
6222 detect an effect size of 0.60 for all pair-wise comparisons, with a two-sided type 1 error rate of  
6223 0.05. This is smaller than that found in our on-going study to date for CPD and smaller than the  
6224 effect sizes reported by Hatsukami et al. 2010<sup>38</sup> for all measures except breath CO. In addition,  
6225 this sample size provides greater than 95% power to detect a linear dose-response effect  
6226 across the four experimental conditions. Because we have relied only on outcomes at Week 16,  
6227 our proposed sample sizes are somewhat conservative, but we believe this is appropriate for  
6228 this study given that the effects of VLNC cigarettes in this population, particularly in combination  
6229 with e-cigarettes, are completely unknown. The sample size above assumes a 15% loss to  
6230 follow-up, consistent with our experience in the current study.

## 6231 10. Potential Risks of Participation

### 6232 10.1 Risks of Participation

- 6233 1) Survey Questionnaires. Surveys include questions about participants' medical and  
6234 psychiatric histories, drug and alcohol use and history, breath tests for cigarette and  
6235 alcohol use, urine or salivary tests of illicit drug use and pregnancy, and questionnaires  
6236 about mood. Answering these personal questions can make participants  
6237 uncomfortable. If a participant reports thoughts of killing themselves or other indicators  
6238 of suicidality, a study clinician will come to talk to the participant. The participant may  
6239 also request to see a study clinician if he or she is in discomfort and would like help  
6240 and/or referrals for mental health resources.
- 6241 2) Breach of Confidentiality: The risk of the interview is loss of privacy if other people find  
6242 out the results.
- 6243 3) Undue Influence: Undue influence is a possible risk due to monetary compensation for  
6244 participating in these studies. The likelihood of this risk is low because the  
6245 compensation is commensurate with the amount of time and effort required for these  
6246 studies.
- 6247 4) Drug Testing: A breach of confidentiality could occur and other people could learn of  
6248 the participant's drug use.
- 6249 5) Obtaining Blood Pressure and Heart Rate. The blood pressure cuff may cause minimal  
6250 discomfort. In obtaining blood pressure we may find a participant to have abnormal  
6251 blood pressure and/or heart rate. If participant's blood pressure is abnormal, we will  
6252 inform the participant of this, and participant may be advised to see a doctor, and may  
6253 also be contacted by our study doctor. Also, smoking and nicotine can affect the  
6254 cardiovascular system, which may result in changes in blood pressure and/or heart  
6255 rate.
- 6256 6) Smoking Cigarettes: All cigarettes are detrimental to a person's health and can lead to  
6257 significant medical problems including:
  - 6258 a. Cardiovascular Diseases: Coronary heart disease, heart attack, stroke, peripheral  
6259 vascular disease, reduced blood circulation, abdominal aortic aneurysm
  - 6260 b. Respiratory Diseases: Emphysema, bronchitis, and chronic airway obstruction
  - 6261 c. Cancers: Cancer of the lung, bladder, cervix, esophagus, kidney, larynx, mouth,  
6262 pancreas, throat, and stomach; leukemia
  - 6263 d. Metabolic Diseases: Type 2 Diabetes
  - 6264 e. Other Health Risks Associated with Smoking: Including but not limited to infertility,  
6265 lower bone density in postmenopausal women, and hip fracture in women
  - 6266 f. Death
- 6267 7) Smoking Study Cigarettes. All cigarettes are harmful to a person's health and can lead  
6268

6270 to cardiovascular (heart) disease, respiratory (lung) disease, cancer and other health  
6271 problems. In addition to the above medical problems, participants may experience  
6272 some minor negative health effects such as headaches. Participants may also  
6273 experience smoking withdrawal symptoms, which are listed below. In addition, due to  
6274 the altered nicotine levels, there could be a change in a participant's use of cigarettes  
6275 including the manner in which he or she inhales the smoke. Smoking the study  
6276 cigarette does not necessarily provide any less risk than the participant's usual brand of  
6277 cigarette and could pose increased health risks.

6278 8) Using Study E-cigarettes. E-cigarettes are devices that heat nicotine to produce an  
6279 aerosol. The health effects of e-cigarettes are still unclear, but appear to be less than that  
6280 for tobacco cigarettes. Most e-cigarette users have lower nicotine levels than when they  
6281 smoked regular cigarettes. Some e-cigarette users, especially those who use both e-  
6282 cigarettes and regular tobacco cigarettes as well as youth and young adults, can have  
6283 increased nicotine levels. In some rare cases, these use patterns have been associated  
6284 with seizures. Whether this would occur with the concurrent use of very low nicotine  
6285 cigarettes is unclear. E-cigarettes users very often maintain addiction to nicotine, but  
6286 this addiction appears to be somewhat less than that from tobacco cigarettes. Abruptly  
6287 quitting e-cigarettes could cause withdrawal symptoms similar to those from quitting  
6288 tobacco cigarettes (see below) but slightly less severe. The most common side effects  
6289 include dry mouth, irritation of the throat and mouth, and mild cough. The JUUL and  
6290 Vuse e-cigarettes we will be providing have not been well-studied but appear to be of  
6291 similar risk to other e-cigarettes. Participants may have heard that e-cigarettes, or  
6292 "vapes," can explode and seriously injure people. Study staff should instruct participants  
6293 that although they appear rare, these explosions are dangerous. The exact causes of  
6294 these incidents are not yet clear, but some evidence suggests that battery-related issues  
6295 may lead to vape explosions. In order to prevent e-cigarette related injuries, instruct  
6296 participants to keep their e-cig away from other metal objects, never charge the e-cig  
6297 with a phone or tablet charger, don't charge the e-cig overnight or leave it charging  
6298 unattended, and to stop using the e-cig if the batteries get damaged or wet. The  
6299 participant will be instructed to always keep e-cig liquid out of kids' and pets' reach and  
6300 sight after use. If we study staff learns about additional risks of e-cigarettes during the  
6301 study, participants will be informed of these risks.

6302 9) Mood and Psychiatric Symptom Changes. Participants may experience smoking  
6303 withdrawal symptoms during this study. These symptoms can include anger,  
6304 anxiousness, craving for a cigarette, depressed mood, difficulty concentrating,  
6305 frustration, increased appetite, impatience/impulsivity, irritability, restlessness, sleep  
6306 problems, and weight gain. These feelings can be uncomfortable and can last a couple  
6307 of weeks, but usually are of minimal risk. In addition, if participants have a past history  
6308 of anxiety, depression, or alcoholism, it is possible withdrawal could cause substantial  
6309 increases in depression and anxiety symptoms, but this appears to be rare. At each visit,  
6310 study staff will ask participants how they feel. If either study staff or the participant thinks  
6311 that being in this study is putting the participant's mental health at risk, staff may have the  
6312 participant meet with an on-site clinician and/or stop participating in the study. Further, if  
6313 a participant report thoughts of killing oneself or other indicators of suicidality, a study  
6314 clinician will come to talk to the participant. Participants may also request to see a study  
6315 clinician if he or she is in discomfort and would like help and/or referrals for mental health  
6316 resources.

6317 10) Returning to Regular Smoking: It is possible that if participants return to smoking their  
6318 usual brand of cigarette at the end of the study they may experience mild and transient  
6319 nausea, dizziness, and lightheadedness.

6320

- 6321 11) Risk to Fetus. To avoid risks to a fetus, it is important that participants are not  
6322 pregnant during this study. Avoiding sexual activity is the only certain method to  
6323 prevent pregnancy. However, if participants choose to be sexually active,  
6324 participants should be using approved forms of birth control if applicable determined  
6325 by the Project Medical Director. including but not limited to prescribed birth control  
6326 pills, patch, ring, injections, implants or intrauterine device (IUD) or an appropriate  
6327 “double barrier” method. If you choose to be sexually active during this study,  
6328 pregnancy could still result even with the use of these birth control methods.  
6329

## 6330 **10.2 Avoiding Risks to Fetus**

6331 If participants choose to be sexually active, they should use an appropriate “double barrier”  
6332 method of birth control (such as female use of a diaphragm, or contraceptive sponge, in  
6333 addition to male use of a condom) or the female should be using prescribed “birth control” pills,  
6334 patch, ring, injections, implants or intrauterine device (IUD) if applicable determined by the  
6335 Project Medical Director. If a participant endorses a “double barrier” method, our medical  
6336 professional will speak to the participant to confirm which methods will be used during the  
6337 duration of the study. Participants will be tested for pregnancy every two weeks beginning at  
6338 screening through the last study visit. If a participant becomes pregnant during the study, she  
6339 will be withdrawn from the study. Approximately 30 days after being withdrawn or having a  
6340 positive pregnancy test at the last study visit, the research staff will call the participant to  
6341 confirm her due date. The licensed medical professional will follow-up with the participant after  
6342 delivery to ask questions about the baby’s health.  
6343

## 6344 **10.3 Expected benefits of participation**

6345 There are no benefits from participating in the study. The information obtained from this  
6346 study may ultimately help the Food and Drug Administration decide how best to regulate  
6347 nicotine and tobacco products with the goal of improving public health.  
6348

# 6349 **11. Protection Against Risk**

## 6350 **11.1 Data Collection Protections**

6351 Research data without identifiers will be maintained in a locked file cabinet and on  
6352 password-protected computers in the research staff workplace, with only code numbers  
6353 identifying subjects. Study consent forms and the linkage between the participants’ names and  
6354 codes will be stored in a locked file cabinet inside a locked office. Interviews with participants  
6355 will be conducted in private rooms. Urine or saliva samples for drug and pregnancy tests and  
6356 tobacco exposure biomarkers will be obtained in a private bathroom within the laboratory suite.  
6357 Subjective measures will be administered electronically. The biostatistics and data-  
6358 management team will provide consistent data-management practices for all data in the Center.  
6359 Using REDCap, which is housed on the University of Vermont Medical Center’s HIPAA-  
6360 compliant computing system, will maximize validity and reliability of data. REDCap is a secure,  
6361 web-based system that accommodates local and remote data collection by each project team,  
6362 and allows for data entry work-flow monitoring and data quality control monitoring by biometry  
6363 staff. The RedCap database for this project will be hosted on the UVMCOM servers. In  
6364 addition, data will be collected from participants on a daily basis using an interactive voice  
6365 recognition system (IVR) developed and hosted by TeleSage Inc ([www.telesage.com](http://www.telesage.com), Chapel  
6366 Hill, NC). TeleSage is a company with expertise on gathering patient-centered outcomes  
6367 tracking data for mental health clinical and research institutions. TeleSage has developed  
6368 and hosted behavioral health-related research software systems using IVR and Web-  
6369 based technologies and is leader in behavioral health outcomes tracking technologies. For  
6370 data integrity, data entry windows will follow the structure of paper forms as much as possible to  
6371 allow for ease of entry, and will use predefined choices to minimize errors when possible. Data  
6372 quality monitoring will be facilitated with periodic down loads and analysis using a variety of  
6373 common statistical program format such as SAS, Stata, R, and SPSS. Quality control  
6374



6375 procedures will be conducted for all data collected, including analysis of missing data and logic  
6376 checks for out of range and other anomalous values. This secure electronic data gathering and  
6377 transmission plan, overseen by the experienced biostatistical team, will minimize opportunities  
6378 for breaches of confidentiality. Biological samples for nicotine and carcinogen biomarker  
6379 analysis will be marked with participant ID, stored in the locked laboratory suite, and sent to a  
6380 laboratory for analysis on a quarterly basis.

6381 All information collected as part of this study will be accessible only to research staff. No  
6382 information will be shared with participants' clinicians unless the participant requests this in  
6383 writing. All investigators and staff have undergone (and any new staff will undergo) human  
6384 subjects' ethics training as required by UVM and are fully conversant with relevant ethical  
6385 principals around confidentiality. Assessments, consenting and study procedures will be closely  
6386 supervised by the PI.

6387 The sponsors (NIDA/FDA) as well as the Institutional Review Board and regulatory  
6388 authorities could be granted direct access to original medical and research records for  
6389 verification of clinical trial procedures and/or data. If this is required, it will be done under  
6390 conditions that will protect privacy to the fullest extent possible consistent with laws relating to  
6391 public disclosure of information and the law-enforcement responsibilities of the agency.

### 6392 **11.2 Data Storage:**

6393 Data will be stored locally at each site. Long-term storage of all study data, for at least 7  
6394 years after study completion, will be at the University of Vermont.

## 6395 **12. Adverse Events**

6396 The research assistant will ask about adverse events at each session, using a form that  
6397 assesses the nature, severity, duration, action taken, and outcome of study-related adverse  
6398 events. AEs will be captured from the time of first study cigarette. Participants will be given  
6399 contact cards to inform us of events that occur between study contacts. Any AE that remains  
6400 open will be reviewed and closed at an interview conducted 30 days after the study completion  
6401 date (completers) or when the study should have ended had the participant completed the study  
6402 (dropouts and those withdrawn by investigator).

6403 All procedures will be monitored to ensure that they conform to the approved protocol. In  
6404 addition, monitoring will be done of all unforeseen circumstances that might arise and affect  
6405 safety; of all reports of serious adverse events as defined in 38 CFR 46 (death, new or  
6406 prolonged hospitalization, persistent or significant disability/incapacity); of other significant  
6407 adverse events (adverse events that lead to drop out by the participant or termination by the  
6408 investigator); of unexpected adverse events resulting from the study, and of expected adverse  
6409 events.

6410 Any SAE will be brought to the attention of the site PIs as soon as possible and not longer  
6411 than 24 hours. Any AE or SAE that is both unexpected and related to study participation will be  
6412 reported to the IRB within 7 days of the event. The local IRB will make a determination as to  
6413 whether additional reporting requirements are needed. IRB actions will be reported to the  
6414 funding agency by the PIs no less than annually and more frequently as recommended by the  
6415 local IRB. Any SAEs will be summarized in the yearly Progress Reports to the funding agency,  
6416 including a review of frequency and severity. All SAEs will be followed through ongoing  
6417 consultation with the physician caring for the patient until they resolve, result in death, or  
6418 stabilize and are not expected to improve. The study staff will be in close contact with  
6419 participants and health care providers throughout the study to monitor for potential  
6420 unanticipated problems. Any unanticipated problems will be discussed at the weekly research  
6421 staff meetings and reported as required to the local IRB.

## 6423 **13. Withdrawal or Monitoring of Participants**

6424 **For the participant's protection, participants will be withdrawn immediately from the**  
6425 **study if any of the following occur:**  
6426

- 6427  
6428  
6429  
6430  
6431  
6432  
6433  
6434  
6435  
6436  
6437  
6438  
6439  
6440  
6441  
6442  
6443  
6444  
6445  
6446  
6447  
6448  
6449  
6450  
6451  
6452  
6453  
6454  
6455  
6456  
6457  
6458  
6459  
6460  
6461  
6462  
6463
- 1) Cardiovascular disease (CVD) event: Typically includes MI (heart attack), PTCA (angioplasty/stenting), bypass surgery, stroke, peripheral vascular disease (arterial blockages in arms or legs leading to procedure or surgery). Less common CVD problems would be new cardiac arrhythmias (e.g., new atrial fibrillation) or new valvular disease (e.g., mitral or aortic regurgitation).
  - 2) DVT/PE (deep vein thrombosis/pulmonary embolism, i.e., blood clots in the venous system).
  - 3) Suicide Attempt: A participant will be withdrawn if he/she attempts suicide at any time during participation in the study.
  - 4) Psychiatric Hospitalization: A participant will be withdrawn if he/she is hospitalized for psychiatric reasons at any time during participation in the study.
  - 5) Pregnancy: If participant indicates she is pregnant or has a positive pregnancy test at any time during the study, she will be withdrawn from the study, and this event will remain open until delivery. At that time the licensed medical professional will contact the participant to ask a few questions about the baby's health and will update the open 'Medical Event Form'. A positive pregnancy test at Week 16 will trigger a 'Medical Event Form' to be completed but will not result in withdrawal since she is no longer receiving study product.
  - 6) Expired breath carbon monoxide increase: A participant will be withdrawn from the study if the average of two consecutive CO readings during the same visit is 100 ppm or greater.
  - 7) Marked increase in smoking: A participant will be withdrawn from the study if he/she meets **BOTH** of the following criteria for two consecutive weeks
    - a. Cigarette per day increase: The average CPD increases by more than 100% from the average CPD during baseline.
    - b. Expired breath carbon monoxide increase: If the average of two consecutive CO measurements in the same visit is
      - i. CO is greater than 50 ppm if CO at Baseline 1 is <20 ppm.
      - ii. CO is greater than 60 ppm if CO at Baseline 1 is 20 – 34 ppm.
      - iii. CO is greater than 70 ppm if CO at Baseline 1 is 35 – 49 ppm.
      - iv. CO is greater than 80 ppm if CO at Baseline 1 is 50 – 64 ppm.
      - v. CO is greater than 90 ppm if CO at Baseline 1 is 65 – 80 ppm.
    - c. Note: If the second consecutive visit is the last study visit, then the participant would not be withdrawn from the study.
  - 8) If a participant is discharged from or discontinues his or her methadone or buprenorphine treatment, they will be discontinued from the study.

6464  
6465

**The following will be monitored and can lead to the participant being withdrawn by the PI or Licensed Medical Professional:**

- 6466  
6467  
6468  
6469  
6470  
6471  
6472  
6473  
6474  
6475  
6476  
6477
- 1) Cigarettes per day increase: Continued participation will be evaluated by the site PI if the average number of cigarettes per day (CPD) increases by more than 100% from the average CPD during baseline as determined by CPD at Baseline 2.
  - 2) Blood pressure (BP) or heart rate (HR) changes: If any of the following occur post-enrollment: 1) BP is at or above 160/100 or below 90/50, or 2) HR is at or above 115 bpm or below 45 bpm a manual blood pressure and heart rate measurement will be taken after 10 minutes have passed. If the manual reading is still out of range, a 'Blood Pressure and Heart Rate Symptom Checklist' and 'Medical Event Form' will be completed, and the participant will be monitored by the medical professional.
  - 3) Expired breath Carbon Monoxide increase: If the average of two consecutive CO measurements meets the criteria below then the 'Medical Event Form' will be completed and the participant will be monitored by the medical professional.

- 6478 a. CO is greater than 50 ppm if CO at Baseline 1 is <20 ppm.  
6479 b. CO is greater than 60 ppm if CO at Baseline 1 is 20 – 34 ppm.  
6480 c. CO is greater than 70 ppm if CO at Baseline 1 is 35 – 49 ppm.  
6481 d. CO is greater than 80 ppm if CO at Baseline 1 is 50 – 64 ppm.  
6482 e. CO is greater than 90 ppm if CO at Baseline 1 is 65 – 80 ppm.
- 6483 4) Any hospitalization or debilitation in which participation in the study could be detrimental  
6484 to the recovery process. This will be self-reported by the participant and will be reviewed  
6485 by the site PI and medical professional to determine whether continued participation in  
6486 the study is appropriate.
- 6487 5) If a participant is behaving in an inappropriate or threatening manner, admits to lying  
6488 about eligibility criteria, is participating in other smoking research studies that could  
6489 affect the primary outcome measures, etc., then the PI can withdraw him/her from the  
6490 study at the PI's discretion.
- 6491 6) If a participant fails to attend regularly scheduled research assessment visits or comply  
6492 with the research procedures or schedule, then the PI can withdraw him/her from the  
6493 study at the PI's discretion.
- 6494 7) Increase in psychiatric symptoms: Exacerbation in symptoms noted during the study  
6495 (i.e., change in BDI category from mild to moderate or moderate to severe) will trigger  
6496 review by the study's licensed medical professional. The PI will withdraw the participant  
6497 upon the licensed medical professional's recommendation.  
6498

#### 14. Data Safety Monitoring Board

6500  
6501 A Data and Safety Monitoring Board (DSMB) has been established to monitor safety  
6502 outcomes and will be comprised of four members. The DSMB will be chaired by Kevin Delucchi,  
6503 PhD., Professor in Residence of Biostatistics in Psychiatry at the University of California San  
6504 Francisco and Director of the Quantitative Core of the San Francisco Treatment Research  
6505 Center; Eden Evins, MD, MPH., Cox Family Professor of Psychiatry at Harvard Medical School  
6506 and Director of Center for Addiction Medicine at Massachusetts General Hospital; Ari  
6507 Kirshenbaum, PhD, Professor of Psychology at Saint Michael's College who he teaches  
6508 courses in psychopharmacology and neuroscience, and currently has grants from NIH and NSF  
6509 for work in human behavioral pharmacology and his grant-funded work focuses on cognitive  
6510 and behavioral responses to nicotine and cannabinoids; and Elisabeth Johnson, Ph.D., who has  
6511 over twenty years of clinical experience in women's health and pediatrics, including caring for  
6512 women with substance use disorders.  
6513

#### Conflict of Interest

6514  
6515 None of the board members will be otherwise affiliated with the center and each member will  
6516 complete a conflict of interest disclosure form prior to each meeting. Ad hoc specialists may be  
6517 invited to participate as non-voting members at any time if additional expertise is desired.  
6518

#### Monitoring Activities and Frequency of Meetings

6519  
6520 The DSMB will set their own agenda and decisions about monitoring; e.g. how frequently to  
6521 monitor, what threshold requires changes to protocol or stopping the study, and whether to view  
6522 raw or analyzed data. The DSMB will be given FDA and EMEA guidelines for DSMBs and  
6523 recent reviews on DSMBs. A brief report will be generated from each meeting for the study  
6524 record and forwarded to each of the study site's Institutional Review Boards (IRB) and NIDA's  
6525 Program Officer with the progress report. The DSMB will be available to convene outside of the  
6526 regular meetings, if necessary. If concerns should arise regarding a particular subject, or any  
6527 troublesome trends in the experiences of participants, they will make appropriate  
6528 recommendations for changes in protocol, as needed. The project investigators will continue to  
6529 examine safety data, blind to study condition, in case they wish to make study modifications.  
6530 Before modifications are made, they will inform the DSMB and request their comments.  
6531

6532 **Communication Plan to IRB, NIDA, and FDA (if applicable)**

6533 All IRBs, the FDA and the NIDA's Program Officer will be informed of any significant action  
6534 taken as a result of the Data and Monitoring Board's findings. Study Participants will be  
6535 informed of any changes in risk.  
6536

6537 **Protection of Confidentiality**

6538 For DSMB meetings only de-identified data, including blinded study site and condition type,  
6539 will be provided to the board. All data and discussion during the meeting will be confidential.  
6540

6541 **15. Investigational Tobacco Product**

6542 The University of Vermont Center on Tobacco Regulatory Science will complete an  
6543 Investigational Tobacco Product (ITP) application with the FDA to cover the experimental  
6544 cigarettes being used in this study. This application encompasses both Project 1 sites.  
6545  
6546

6547 **16. Certificate of Confidentiality**

6548 To help protect the participant's privacy, Dr. Stephen Higgins, PhD, will obtain a Certificate  
6549 of Confidentiality from the national Institute on Drug Abuse. With this certificate, the researchers  
6550 cannot be forced to disclose information that may identify the participants, even by a court  
6551 subpoena, in any federal, state, or local civil, criminal, administrative, legislative, or other  
6552 proceedings. The researchers will use the Certificate to resist any demands for information that  
6553 would identify the participants, except as explained below. The Certificate cannot be used to  
6554 resist a demand for information from personnel of the United States Government that is used  
6555 for auditing or evaluation of federally funded projects or for information that must be disclosed in  
6556 order to meet the requirements of the Federal Food and Drug Administration (FDA).  
6557

6558 The Certificate of Confidentiality does not prevent the participant or a member of their family  
6559 from voluntarily releasing information about themselves and their involvement in the research. If  
6560 an insurer, employer or other person obtains the participant's written consent to receive  
6561 research information, then the researcher may not use the Certificate to withhold that  
6562 information.

6563 The Certificate of Confidentiality does not prevent the researchers from disclosing  
6564 voluntarily, without consent, information that would identify the individual as a participant of the  
6565 research project in instances such as evidence of child abuse or a participant's threatened  
6566 violence to self or others.

6567 **17. Outcome Variables**

6568 **Primary Endpoints for Study 3:**

- 6569 1) Cigarette Smoked per Day (CPD)  
6570 2) Nicotine Dependence Severity  
6571

6572 **Secondary Endpoints for Study 3:**

- 6573 1) Measures of adherence: non-study cigarette use, drop-out rate  
6574 2) Measures of psychiatric symptoms: BDI, OASIS  
6575 3) Measures of discomfort/dysfunction: MNWS, QSU  
6576 4) Measures of other health-related behaviors: breath alcohol, urine or salivary drug  
6577 screen, TLFB-drug use, Alcohol Use Questionnaire, Drug Use Questionnaire, weight  
6578 5) Measures of nicotine/tobacco dependence: FTND, WISDM  
6579 6) Measures of tobacco exposure: CO, total nicotine equivalents, NNN, NNAL, minor  
6580 alkaloids  
6581 7) Measures of intention to quit: Stages of Change, Contemplation Ladder  
6582 8) Measures of compensatory smoking: puff topography, filter analysis  
6583 9) Measures of other tobacco use: TLFB-other tobacco

- 6584 10) Measures of cigarette characteristics: CES, Cigarette Purchase Task
  - 6585 11) Measures of cardiovascular function: heart rate, blood pressure, urine 11-
  - 6586 dehydroTXB2
  - 6587 12) Measures of perceived risk: Perceived Health Risk Questionnaire
  - 6588 13) Safety outcome variables: Adverse Events (AEs), Serious Adverse Events (SAEs)
  - 6589
  - 6590
- 

6591  
6592

## References

- 6593 1. Benowitz NL, Henningfield JE. Establishing a nicotine threshold for addiction. The  
6594 implications for tobacco regulation. *N Engl J Med.* 1994;331(2):123-125.
- 6595 2. Tengs TO, Ahmad S, Savage JM, Moore R, Gage E. The AMA proposal to mandate nicotine  
6596 reduction in cigarettes: a simulation of the population health impacts. *Prev Med.*  
6597 2005;40(2):170-180.
- 6598 3. Higgins ST, Chilcoat HD. Women and smoking: an interdisciplinary examination of  
6599 socioeconomic influences. *Drug Alcohol Depend.* 2009;104 Suppl 1:S1-5.
- 6600 4. Chilcoat HD. An overview of the emergence of disparities in smoking prevalence, cessation,  
6601 and adverse consequences among women. *Drug Alcohol Depend.* 2009;104 Suppl 1:S17-23.
- 6602 5. Kurti AN, Redner R, Lopez AA, et al. Tobacco and nicotine delivery product use in a national  
6603 sample of pregnant women. *Prev Med.* 2017. In press.
- 6604 6. Lopez AA, Redner R, Kurti AN, et al. Tobacco and nicotine delivery product use in a U.S.  
6605 national sample of women of reproductive age. In preparation.
- 6606 7. Higgins ST, Heil SH, Badger GJ, Skelly JM, Solomon LJ, Bernstein IM. Educational  
6607 disadvantage and cigarette smoking during pregnancy. *Drug Alcohol Depend.* 2009;104  
6608 Suppl 1:S100-105.
- 6609 8. Higgins ST, Solomon LJ. Some recent developments on financial incentives for smoking  
6610 cessation among pregnant and newly postpartum women. *Curr Addict Rep.* 2016;3(1):9-18.
- 6611 9. Kandel DB, Griesler PC, Schaffran C. Educational attainment and smoking among women:  
6612 risk factors and consequences for offspring. *Drug Alcohol Depend.* 2009;104 Suppl 1:S24-33.
- 6613 10. Vurbic D, Harder VS, Redner RR, Lopez AA, Phillips JK, Higgins ST. Co-occurring obesity  
6614 and smoking among U.S. women of reproductive age: Associations with educational  
6615 attainment and health biomarkers and outcomes. *Prev Med.* 2015;80:60-66.
- 6616 11. WHO. Tobacco or health: A global status report. Geneva, Switzerland: WHO Press, 1997.
- 6617 12. WHO. Gender, women, and the tobacco epidemic. Geneva, Switzerland: WHO Press, 2010.
- 6618 13. Hughes EG, Brennan BG. Does cigarette smoking impair natural or assisted fecundity? *Fertil*  
6619 *Steril.* 1996;66(5):679-689.
- 6620 14. Sun L, Tan L, Yang F, et al. Meta-analysis suggests that smoking is associated with an  
6621 increased risk of early natural menopause. *Menopause.* 2012;19(2):126-132.
- 6622 15. US Department of Health and Human Services. The Health Consequences of Smoking—50  
6623 Years of Progress: A Report of the Surgeon General. Atlanta: U.S. Department of Health and  
6624 Human Services, Centers for Disease Control and Prevention, National Center for Chronic  
6625 Disease Prevention and Health Promotion, Office on Smoking and Health, 2014.
- 6626 16. WHO. Tobacco smoke and involuntary smoking. Lyon, France: WHO Press, 2004.
- 6627 17. Flower A, Shawe J, Stephenson J, Doyle P. Pregnancy planning, smoking behaviour during  
6628 pregnancy, and neonatal outcome: UK Millennium Cohort Study. *BMC Pregnancy Childbirth.*  
6629 2013;13:238.
- 6630 18. Solomon L, Quinn V. Spontaneous quitting: self-initiated smoking cessation in early  
6631 pregnancy. *Nicotine Tob Res.* 2004;6 Suppl 2:S203-216.
- 6632 19. Morasco BJ, Dornelas EA, Fischer EH, Oncken C, Lando HA. Spontaneous smoking  
6633 cessation during pregnancy among ethnic minority women: a preliminary investigation. *Addict*  
6634 *Behav.* 2006;31(2):203-210.
- 6635 20. Ananth CV, Smulian JC, Vintzileos AM. Incidence of placental abruption in relation to  
6636 cigarette smoking and hypertensive disorders during pregnancy: a meta-analysis of  
6637 observational studies. *Obstet Gynecol.* 1999;93(4):622-628. Castles A, Adams EK, Melvin  
6638 CL, Kelsch C, Boulton ML. Effects of smoking during pregnancy. Five meta-analyses. *Am J*  
6639 *Prev Med.* 1999;16(3):208-215.
- 6640 21. Savitz DA, Murnane P. Behavioral influences on preterm birth: a review. *Epidemiology.*  
6641 2010;21(3):291-299.
- 6642 22. Bakketeig LS, Jacobsen G, Hoffman HJ, et al. Pre-pregnancy risk factors of small-for-

- 6643 gestational age births among parous women in Scandinavia. *Acta Obstet Gynecol Scand.*  
6644 1993;72(4):273- 279.
- 6645 23. Spinillo A, Capuzzo E, Nicola SE, Colonna L, Egbe TO, Zara C. Factors potentiating the  
6646 smoking- related risk of fetal growth retardation. *Br J Obstet Gynaecol.* 1994;101(11):954-  
6647 958.
- 6648 24. Higgins ST, Heil SH, Sigmon SC, et al. Response to varying the nicotine content of cigarettes  
6649 in vulnerable populations: an initial experimental examination of acute effects.  
6650 *Psychopharmacology (Berl).* 2017;234(1):89-98.
- 6651 25. Higgins ST, Heil SH, Sigmon SC, Tidey JW, Gaalema DE, Stitzer ML, Durand H, Bunn JY,  
6652 Priest JS, Arger CA, Miller ME, Bergeria CL, Davis DR, Streck JM, Reed DD, Skelly JM, Tursi  
6653 L. Addiction potential of reduced nicotine content cigarettes in populations with psychiatric  
6654 disorders and other vulnerabilities to tobacco addiction. *JAMA Psych.* In press.
- 6655 26. United States Department of Health and Human Services. Substance Abuse and Mental  
6656 Health Services Administration. Center for Behavioral Health Statistics and Quality. National  
6657 Survey on Drug Use and Health, 2016. 34481-v3. Research Triangle Park, NC: RTI  
6658 International, 2016-04- 02.
- 6659 27. Perkins KA, Donny E, Caggiula AR. Sex differences in nicotine effects and self-  
6660 administration: review of human and animal evidence. *Nicotine Tob Res.* 1999;1(4):301-315.
- 6661 28. Dawkins L, Kimber C, Puwanesarasa Y, Soar K. First- versus second-generation electronic  
6662 cigarettes: predictors of choice and effects on urge to smoke and withdrawal symptoms.  
6663 *Addiction.* 2015;110(4):669-677.
- 6664 29. Farsalinos KE, Spyrou A, Tsimopoulou K, Stefopoulos C, Romagna G, Voudris V. Nicotine  
6665 absorption from electronic cigarette use: comparison between first and new-generation  
6666 devices. *Sci Rep.* 2014;4:4133.
- 6667 30. Goniewicz ML, Kuma T, Gawron M, Knysak J, Kosmider L. Nicotine levels in electronic  
6668 cigarettes. *Nicotine Tob Res.* 2013;15(1):158-166.
- 6669 31. Talih S, Balhas Z, Eissenberg T, et al. Effects of user puff topography, device voltage, and  
6670 liquid nicotine concentration on electronic cigarette nicotine yield: measurements and model  
6671 predictions. *Nicotine Tob Res.* 2015;17(2):150-157.
- 6672 32. Trtchounian A, Williams M, Talbot P. Conventional and electronic cigarettes (e-cigarettes)  
6673 have different smoking characteristics. *Nicotine Tob Res.* 2010;12(9):905-912.
- 6674 33. Farsalinos KE, Polosa R. Safety evaluation and risk assessment of electronic cigarettes as  
6675 tobacco cigarette substitutes: a systematic review. *Ther Adv Drug Saf.* 2014;5(2):67-86.
- 6676 34. Rom O, Pecorelli A, Valacchi G, Reznick AZ. Are E-cigarettes a safe and good alternative to  
6677 cigarette smoking? *Ann N Y Acad Sci.* 2015;1340:65-74.
- 6678 35. Hecht SS, Carmella SG, Kotandeniya D, et al. Evaluation of toxicant and carcinogen  
6679 metabolites in the urine of e-cigarette users versus cigarette smokers. *Nicotine Tob Res.*  
6680 2015;17(6):704-709.
- 6681 36. Goniewicz ML, Knysak J, Gawron M, et al. Levels of selected carcinogens and toxicants in  
6682 vapour from electronic cigarettes. *Tob Control.* 2014;23(2):133-139.
- 6683 37. Hatsukami DK, Kotlyar M, Hertsgaard LA, et al. Reduced nicotine content cigarettes: effects  
6684 on toxicant exposure, dependence and cessation. *Addiction.* 2010;105(2):343-355.
- 6685 38. Goniewicz ML, Gawron M, Smith DM, Peng M, Jacob P, Benowitz NL. Exposure to Nicotine  
6686 and Selected Toxicants in Cigarette Smokers Who Switched to Electronic Cigarettes: A  
6687 Longitudinal Within-Subjects Observational Study. *Nicotine Tob Res.* 2017;19(2):160-167.
- 6688 39. Strong DR, Myers M, Linke S, et al. Gender differences influence overweight smokers'  
6689 experimentation with electronic nicotine delivery systems. *Addict Behav.* 2015;49:20-25.
- 6690 40. Grace RC, Kivell BM, Laugesen M. Gender differences in satisfaction ratings for nicotine  
6691 electronic cigarettes by first-time users. *Addict Behav.* 2015;50:140-143.
- 6692 41. Chivers LL, Hand DJ, Priest JS, Higgins ST. E-cigarette use among women of reproductive  
6693 age: Impulsivity, cigarette smoking status, and other risk factors. *Prev Med.* 2016;92:126-134.
- 6694 42. Bullen C, Howe C, Laugesen M, et al. Electronic cigarettes for smoking cessation: a  
6695 randomised controlled trial. *Lancet.* 2013;382(9905):1629-1637.
- 6696 43. Caponnetto P, Audatore R, Russo C, Cappello GC, Polosa R. Impact of an electronic cigarette

- 6697 on smoking reduction and cessation in schizophrenic smokers: a prospective 12-month pilot  
6698 study. *Int J Environ Res Public Health*. 2013;10(2):446-461.
- 6699 44. Tseng T-Y, Ostroff JS, Campo A, et al. A Randomized Trial Comparing the Effect of Nicotine  
6700 Versus Placebo Electronic Cigarettes on Smoking Reduction Among Young Adult Smokers.  
6701 *Nicotine Tob Res*. 2016;18(10):1937-1943.
- 6702 45. Walton KM, Abrams DB, Bailey WC, et al. NIH electronic cigarette workshop: developing a  
6703 research agenda. *Nicotine Tob Res*. 2015;17(2):259-269.
- 6704 46. Adriaens K, Van Gucht D, Declerck P, Baeyens F. Effectiveness of the electronic cigarette:  
6705 An eight-week Flemish study with six-month follow-up on smoking reduction, craving and  
6706 experienced benefits and complaints. *Int J Environ Res Public Health*. 2014;11(11):11220-  
6707 11248.
- 6708 47. Glasser AM, Collins L, Pearson JL, et al. Overview of Electronic Nicotine Delivery Systems: A  
6709 Systematic Review. *Am J Prev Med*. 2017;52(2):e33-e66.
- 6710 48. Bullen C, McRobbie H, Thornley S, Glover M, Lin R, Laugesen M. Effect of an electronic  
6711 nicotine delivery device (e cigarette) on desire to smoke and withdrawal, user preferences  
6712 and nicotine delivery: randomised cross-over trial. *Tob Control*. 2010;19(2):98-103.
- 6713 49. Dawkins L, Turner J, Hasna S, Soar K. The electronic cigarette: effects on desire to smoke,  
6714 withdrawal symptoms and cognition. *Addict Behav*. 2012;37(8):970-3.
- 6715 50. Vansickel AR, Weaver MF, Eissenberg T. Clinical laboratory assessment of the abuse liability  
6716 of an electronic cigarette. *Addiction*. 2012 Aug;107(8):1493-500.
- 6717 51. Lechner WV, Meier E, Wiener JL, et al. The comparative efficacy of first- versus second-  
6718 generation electronic cigarettes in reducing symptoms of nicotine withdrawal. *Addiction*.  
6719 2015;110(5):862-867.
- 6720 52. Bonhomme MG, Holder-Hayes E, Ambrose BK, et al. Flavoured non-cigarette tobacco  
6721 product use among US adults: 2013-2014. *Tob Control*. 2016;25(Suppl 2):ii4-ii13.
- 6722 53. Villanti AC, Johnson AL, Ambrose BK, et al. Flavored tobacco product use in youth and  
6723 adults: Findings from the first wave of the PATH study (2013-2014). *Am J Prev Med*. March  
6724 2017.
- 6725 54. Audrain-McGovern J, Strasser AA, Wileyto EP. The impact of flavoring on the rewarding and  
6726 reinforcing value of e-cigarettes with nicotine among young adult smokers. *Drug Alcohol  
6727 Depend*. 2016;166:263-267.
- 6728 55. Goldenson NI, Kirkpatrick MG, Barrington-Trimis JL, et al. Effects of sweet flavorings and  
6729 nicotine on the appeal and sensory properties of e-cigarettes among young adult vapers:  
6730 Application of a novel methodology. *Drug Alcohol Depend*. 2016;168:176-180.
- 6731 56. Berg CJ. Preferred flavors and reasons for e-cigarette use and discontinued use among  
6732 never, current, and former smokers. *Int J Public Health*. 2016;61(2):225-236.
- 6733 57. Kistler CE, Crutchfield TM, Sutfin EL, et al. Consumers' Preferences for Electronic Nicotine  
6734 Delivery System Product Features: A Structured Content Analysis. *Int J Environ Res Public  
6735 Health*. 2017;14(6).
- 6736 58. Czoli CD, Goniewicz M, Islam T, Kotnowski K, Hammond D. Consumer preferences for  
6737 electronic cigarettes: results from a discrete choice experiment. *Tob Control*.  
6738 2016;25(e1):e30-36.
- 6739 59. Pesko MF, Kenkel DS, Wang H, Hughes JM. The effect of potential electronic nicotine  
6740 delivery system regulations on nicotine product selection. *Addiction*. 2016;111(4):734-744.
- 6741 60. Etter J-F. Electronic cigarettes: a survey of users. *BMC Public Health*. 2010;10:231.
- 6742 61. Farsalinos KE, Romagna G, Tsiapras D, Kyrzopoulos S, Spyrou A, Voudris V. Impact of  
6743 flavour variability on electronic cigarette use experience: an internet survey. *Int J Environ Res  
6744 Public Health*. 2013;10(12):7272-7282.
- 6745 62. Yingst JM, Veldheer S, Hrabovsky S, Nichols TT, Wilson SJ, Foulds J. Factors Associated  
6746 With Electronic Cigarette Users' Device Preferences and Transition From First Generation to  
6747 Advanced Generation Devices. *Nicotine Tob Res*. 2015;17(10):1242-1246.
- 6748 63. Litt MD, Duffy V, Oncken C. Cigarette smoking and electronic cigarette vaping patterns as a  
6749 function of e-cigarette flavourings. *Tob Control*. 2016;25(Suppl 2):ii67-ii72.
- 6750 64. Jorenby DE, Smith SS, Fiore MC, Baker TB. Nicotine levels, withdrawal symptoms, and



- 6751 smoking reduction success in real world use: A comparison of cigarette smokers and dual  
6752 users of both cigarettes and E-cigarettes. *Drug Alcohol Depend.* 2017;170:93-101.
- 6753 65. Giovino GA, Villanti AC, Mowery PD, et al. Differential trends in cigarette smoking in the USA:  
6754 is menthol slowing progress? *Tob Control.* 2015;24(1):28-37.
- 6755 66. Ashford K, Rayens E, Wiggins AT, Rayens MK, Fallin A, Sayre MM. Advertising exposure and  
6756 use of e-cigarettes among female current and former tobacco users of childbearing age.  
6757 *Public Health Nurs.* May 2017.
- 6758 67. Beck AT, Steer RA, Brown GK. *Manual for Beck Depression Inventory – II* 1996; San Antonio,  
6759 TX: Psychological Corporation.
- 6760 68. Norman SB, Cissell SH, Means-Christensen AJ, Stein MB. Development and validation of an  
6761 Overall Anxiety Severity And Impairment Scale (OASIS). *Depress Anxiety.* 2006;23(4):245-  
6762 249.
- 6763 69. Sheehan DV, Lecrubier Y, Sheehan KH, et al. The Mini-International Neuropsychiatric  
6764 Interview (M.I.N.I.): the development and validation of a structured diagnostic psychiatric  
6765 interview for DSM-IV and ICD-10. *J Clin Psychiatry.* 1998;59 Suppl 20:22-33.
- 6766 70. Sheehan DV, Lecrubier Y, Sheehan K, Harnett, Janavs J, Weiller E, et al. (1997). The validity  
6767 of the Mini International Neuropsychiatric Interview (MINI) according to the SCID-P and its  
6768 reliability. *Eur Psychiat* 12, 232–241.
- 6769 71. Babor TF, de la Fuente JR, Saunders J, Grant M. AUDIT: The Alcohol Use Disorders  
6770 Identification Test. Guidelines for use in primary health care. Geneva : World Health  
6771 Organization, 1992.
- 6772 72. Skinner HA. The Drug Abuse Screening Test. *Addict Behav.* 1982; 7(4):363-371.
- 6773 73. Heatherton TF, Kozlowski LT, Frecker RC, Fagerström KO. The Fagerström Test for Nicotine  
6774 Dependence: a revision of the Fagerström Tolerance Questionnaire. *Br J Addict.*  
6775 1991;86(9):1119-1127.
- 6776 74. Piper ME, McCarthy DE, Bolt DM, Smith SS, Lerman C, Benowitz N, et al. Assessing  
6777 dimensions of nicotine dependence; An evaluation of the Nicotine Dependence Syndrome  
6778 Scale (NDSS) and the Wisconsin Inventory of Smoking Dependence Motives (WISDM)  
6779 Nicotine & Tobacco Research. 2008;10:1009-1020.
- 6780 75. Foulds J, Veldheer S, Yingst J, Wilson SJ, Nichols TT, Eissenberg T. Development of a  
6781 questionnaire for assessing dependence on electronic cigarettes among a large sample of ex-  
6782 smoking E-cigarette users. *Nicotine Tob Res.* 2015; 17(2): 186-92.
- 6783 76. DiClemente CC, Prochaska JO, Fairhurst SK, Velicer WF, Velasquez MM, Rossi JS. The  
6784 process of smoking cessation: an analysis of precontemplation, contemplation, and  
6785 preparation stages of change. *J Consult Clin Psychol.* 1991;59(2):295-304.
- 6786 77. Cohen S, Kamarck T, Mermelstein R. A global measure of perceived stress. *J Health Soc  
6787 Behav.* 1983;24(4):385-396.
- 6788 78. Watson D, Clark LA, Tellegen A. Development and validation of brief measures of positive  
6789 and negative affect: the PANAS scales. *J Pers Soc Psychol.* 1988;54(6):1063-1070.
- 6790 79. Hughes JR, Hatsukami D. Signs and symptoms of tobacco withdrawal. *Arch Gen Psychiatry.*  
6791 1986;43(3):289-294.
- 6792 80. Cox LS, Tiffany ST, Christen AG. Evaluation of the brief questionnaire of smoking urges  
6793 (QSU- brief) in laboratory and clinical settings. *Nicotine Tob Res.* 2001;3(1):7-16.
- 6794 81. Dowd AN, Motschman CA, Tiffany ST. Development and Validation of the Questionnaire of  
6795 Vaping Craving. *Nicotine Tob Res.* 2019;12(1):63-70.
- 6796 82. Cappelleri JC, Bushmakin AG, Baker CL, Merikle E, Olufade AO, Gilbert DG. Confirmatory  
6797 factor analyses and reliability of the modified cigarette evaluation questionnaire. *Addict  
6798 Behav.* 2007;32(5):912-923.
- 6799 83. Grace RC, Kivel BM, Laugesen M. Estimating cross-price elasticity of e-cigarettes using a  
6800 simulated demand procedure. *Nicotine Tob Res.* 2015 May;17(5):592-598.  
6801
