# Supplementary material for: Reduced Nicotine Cigarettes and E-Cigarettes in High-Risk Populations: 3 Randomized Clinical Trials
Source: PubMed Central journal article supplement (PMC11380105; doi:10.1001/jamanetworkopen.2024.31731), 2024-09-06
Supplement: jamanetwopen-e2431731-s002.pdf [file jamanetwopen-e2431731-s002.pdf]

## Supplemental Online Content

Higgins ST, Sigmon SC, Tidey JW, et al. Reduced nicotine cigarettes and e-Cigarettes in high-risk populations: 3 randomized clinical trials. *JAMA Netw Open*. 2024;7(9):e2431731.  
doi:10.1001/jamanetworkopen.2024.31731

**eFigure 1.** Number of Total Cigarettes Smoked per Day According to Study Population

**eFigure 2.** Biomarkers of Exposure According to Study Population

**eFigure 3.** Dependence Severity According to Study Population

**eFigure 4.** Craving and Withdrawal

**eFigure 5.** Number of Total Cigarettes Smoked per Day Over Time According to Condition, Across Populations, and According to Population

**eFigure 6.** Number of Total Cigarettes Smoked per Day at Week 16 According to Condition, Across Populations, and According to Study Population

**eFigure 7.** Number of Non-Study Cigarettes Smoked per Day According to Condition

**eFigure 8.** Cigarette Abstinence According to Condition

**eFigure 9.** Nicotine Dependence Severity and Cigarette Craving According to Condition

**eTable 1.** Participant Characteristics

**eTable 2.** e-Cigarette Flavors Selected (VLNC+PF Condition)

**eTable 3.** Total Number of Adverse Events

**eTable 4.** Number of Participants With Any Adverse Event

**eTable 5.** Count of Serious and Severe Adverse Events

**eTable 6.** Description of Serious and Severe Adverse Events

This supplemental material has been provided by the authors to give readers additional information about their work.

## eFigures

### Cigarettes Smoked Per Day

There was a significant main effect of study population on week-16 total CPD (Cohen  $d=0.35$ ;  $P=.007$ ; eFigure 1A), with LSmean ( $\pm$ SEM) rates lower in the AD than WSD population ( $11.45\pm 0.78$  versus  $16.52\pm 1.63$ ) ( $t[221]=-3.18$ ,  $P=.005$ ); AD rates did not differ significantly compared to the OUD population nor did the OUD and WSD populations differ significantly. Similarly, there was also a significant main effect of population in the analysis of total CPD across weeks (Cohen  $d=0.08$ ;  $P=0.025$ ; eFigure 1B), with LSmean ( $\pm$ SEM) rates lower in the AD than WSD population ( $12.25\pm 0.61$  versus  $15.41\pm 1.16$ ) ( $t[301]=2.65$ ,  $P=.023$ ); AD did not differ significantly compared to the OUD population nor did the OUD and WSD populations differ significantly.

**eFigure 1. Number of Total Cigarettes Smoked Per Day According to Study Population**

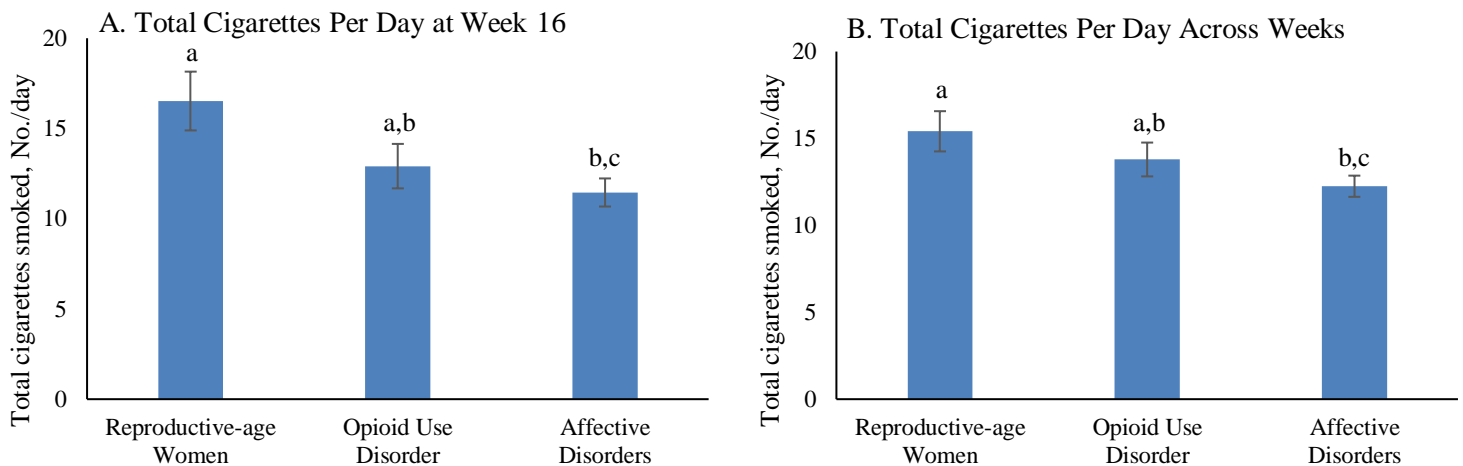

## Biomarkers of Exposure

There was a significant main effect of study population on breath CO in analyses across weeks (Cohen  $d=0.08$ ;  $P=.012$ ; eFigure 2A), with LSmean ( $\pm$ SEM) levels in the AD population below OUD ( $14.41\pm 0.71$  versus  $17.93\pm 1.15$ ) ( $t[308]=-2.73$ ,  $P=.018$ ) but not WSD population levels nor did levels in the OUD and WSD populations differ significantly. There was also a significant main effect of study population on cotinine levels analyzed across weeks 8 and 16 (Cohen  $d=0.22$ ;  $P=.023$ ; eFigure 2B) with LSMean levels in the AD population below OUD ( $2690.62\pm 192.08$  versus  $3666.27\pm 316.80$ ) ( $t[510]=2.74$ ,  $P=.017$ ) but not WSD levels nor did the OUD and WSD levels differ.

**eFigure 2. Biomarkers of Exposure According to Study Population**

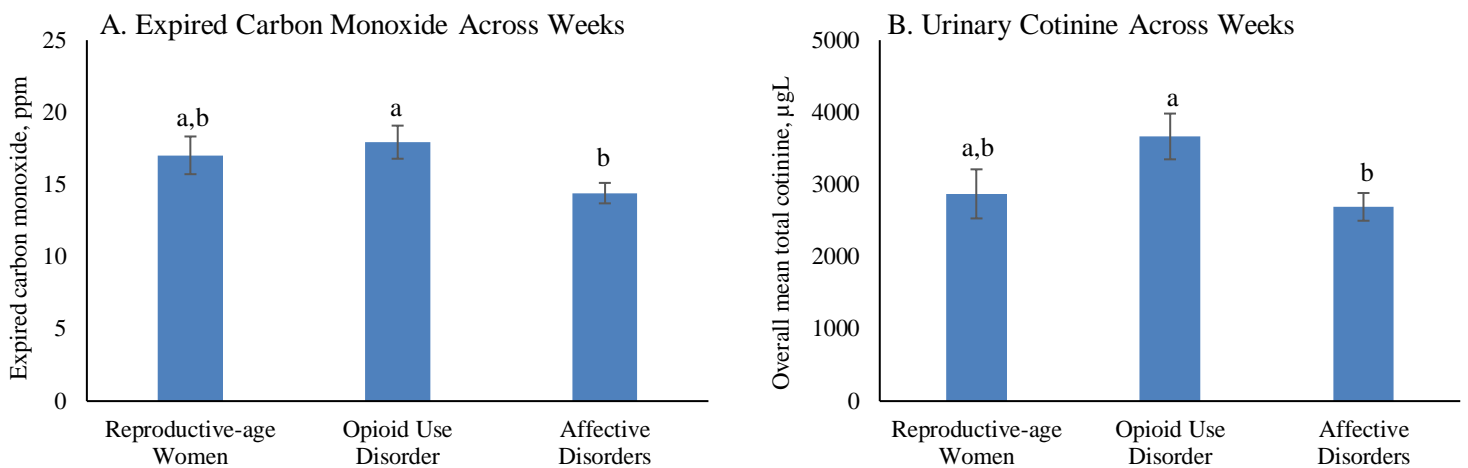

## Dependence Severity

There was a significant main effect of population on week-16 FTND total scores (Cohen  $d=0.29$ ;  $P=.035$ ; eFigure 3A), with LSmean ( $\pm$ SEM) scores lower in the AD than OUD population ( $3.49\pm 0.14$  versus  $4.07\pm 0.20$ ) ( $t[251]=2.42$ ,  $P=.043$ ); AD scores did not differ significantly from WSD scores nor did scores in the WSD and OUD populations differ significantly. In analyses across weeks, again there was a main effect of population (Cohen  $d=0.26$ ;  $P=0.004$ ; eFigure 3B) with LSmean ( $\pm$ SEM) scores lower in the AD than OUD population ( $3.48\pm 0.12$  versus  $4.12\pm 0.17$ ) ( $t[269]=3.20$ ,  $P=.004$ ); AD scores did not differ significantly from the WSD population nor did scores in the WSD and OUD populations differ significantly.

There was a significant week-16 main effect of population in analyses of WISDM primary-motive subscale scores (Cohen  $d=0.31$ ;  $P=.024$ ; eFigure 3C), with lower primary-motive-subscale severity scores in the AD than OUD population ( $13.35\pm 0.42$  versus  $15.20\pm 0.60$ ) ( $t[249]=2.56$ ,  $P=.030$ ); AD scores did not differ significantly from the WSD population nor did scores in the WSD and OUD populations differ significantly.

**eFigure 3. Dependence Severity According to Study Population**

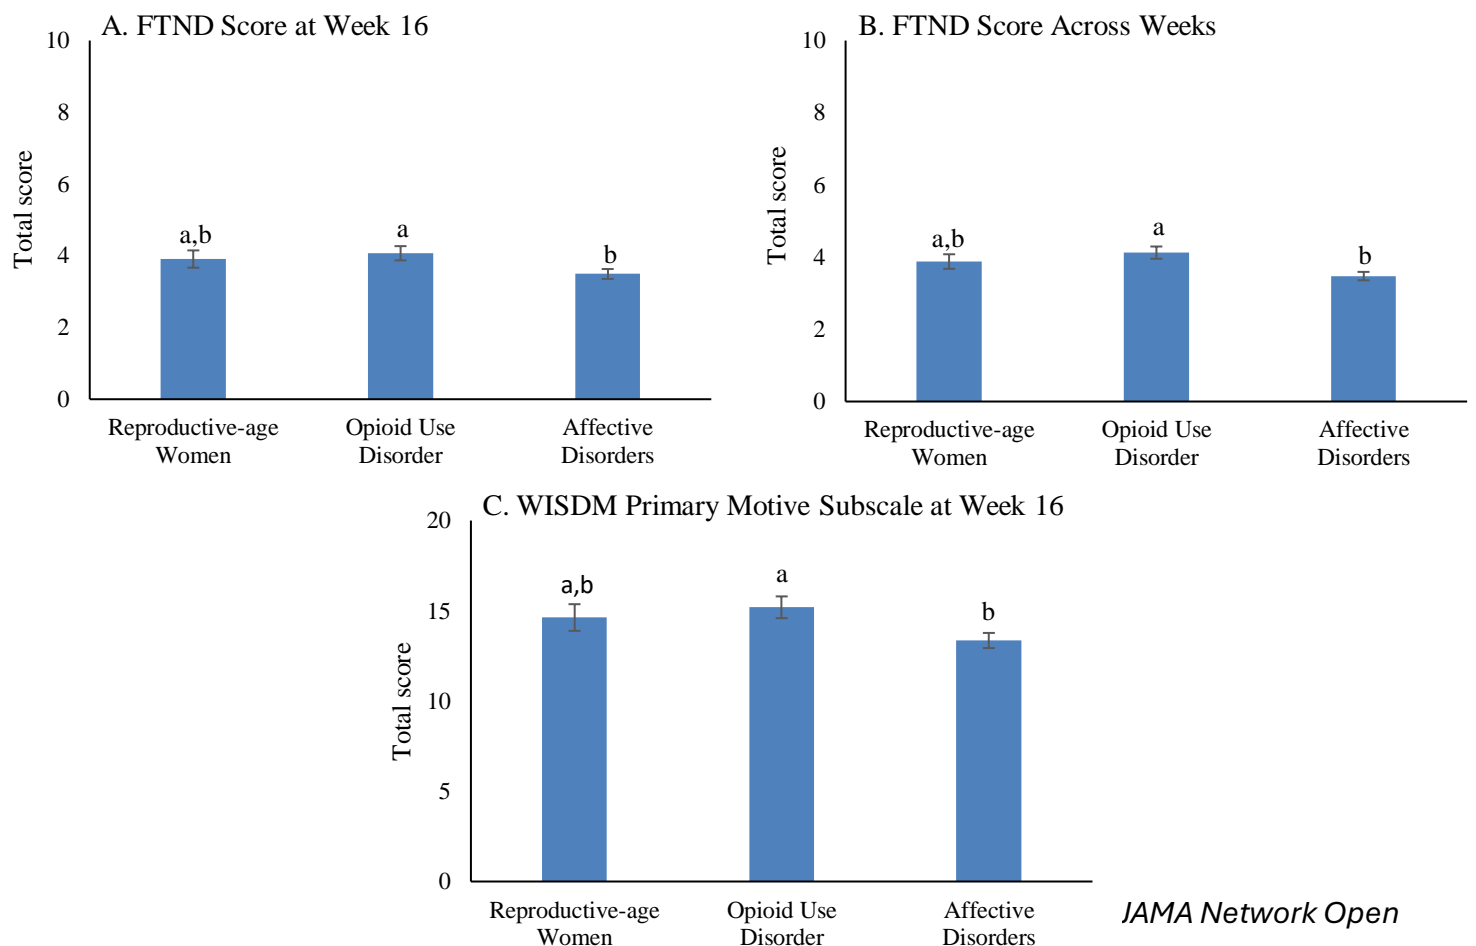

## Craving and Withdrawal

In analyses across weeks, there was a significant main effect of population on QSU Factor-1 ratings of study cigarettes (Cohen  $d=0.12$ ,  $P_s \leq .010$ ; eFigure 4A), with LSmean ( $\pm$ SEM) ratings in the OUD population greater than in the AD ( $3.38 \pm 0.18$  versus  $2.76 \pm 0.12$ ) ( $t[309]=2.84$ ,  $P=.013$ ) and WSD ( $3.38 \pm 0.18$  versus  $2.67 \pm 0.22$ ) ( $t[309]=2.55$ ,  $P=.030$ ) populations; AD scores did not significantly differ from the WSD population. There were also significant main effects of time for QSU Factor-1 (Cohen  $d=0.24$ ,  $P<.001$ ; eFigure 4B) and Factor-2 ratings (Cohen  $d = 0.17$ ,  $P<.001$ ; eFigure 4C), with decreases across weeks in Factor-1 ( $-.040 \pm .006$ ) ( $t[1874]=6.18$ ,  $P<.001$ ) and Factor 2 ( $-.021 \pm .005$ ) ( $t[1874]=4.45$ ,  $P<.001$ ).

The only significant effect on MNWS total scores across weeks was an interaction of population and time (Cohen  $d=0.10$ ,  $P=.003$ ; eFigure 4D), corresponding to steeper decreases across weeks in the AD ( $-.036 \pm .003$ ) ( $t[4062]=10.46$ ,  $P<.001$ ) compared to the OUD populations ( $-.015 \pm .005$ ) ( $t[4062]=2.98$ ,  $P=.003$ ); the WSD population did not differ significantly from the AD or OUD populations. The only significant effect across weeks on desire-to-smoke was a main effect of time with scores decreasing across weeks ( $-.042 \pm .004$ ) ( $t[4064]=10.77$ , Cohen's  $d = 0.30$ ,  $P<.001$ ; eFigure 4E).

**eFigure 4. Craving and Withdrawal**

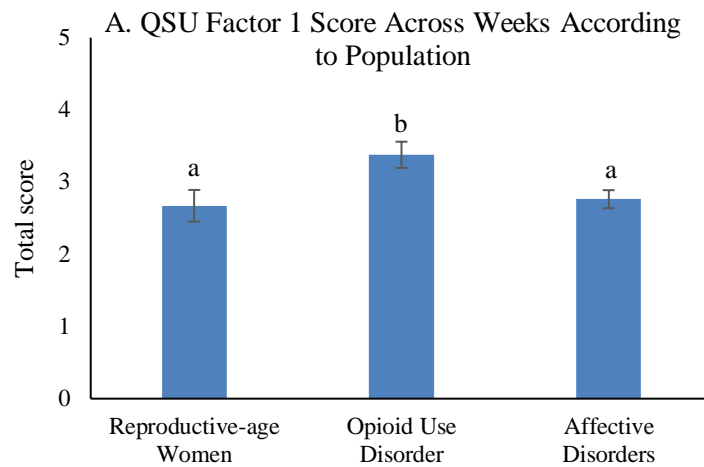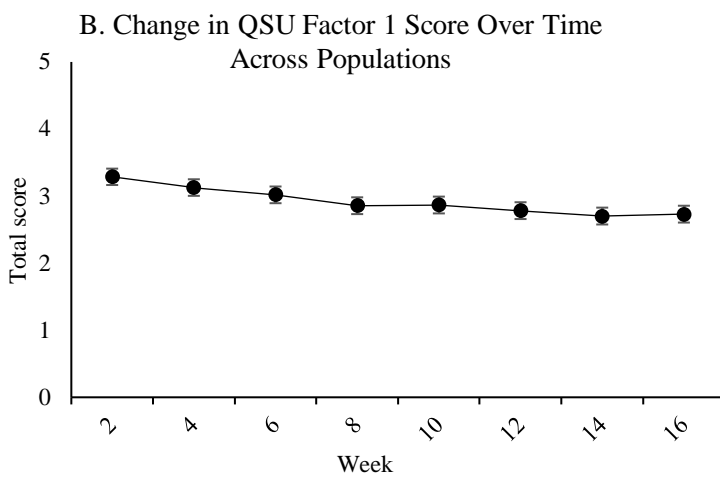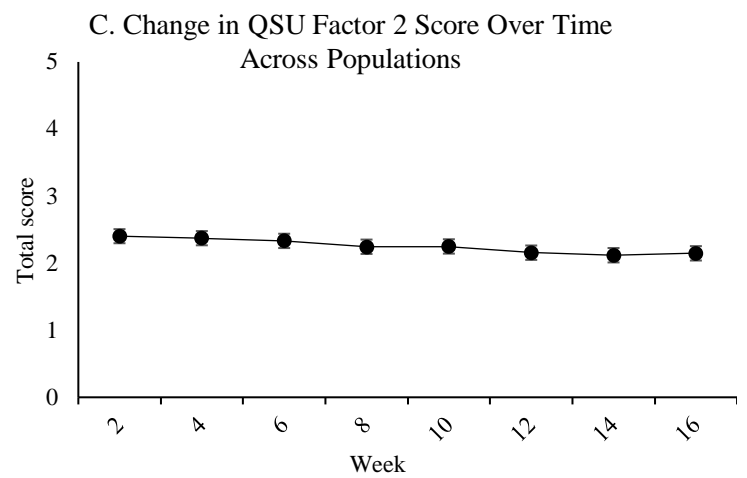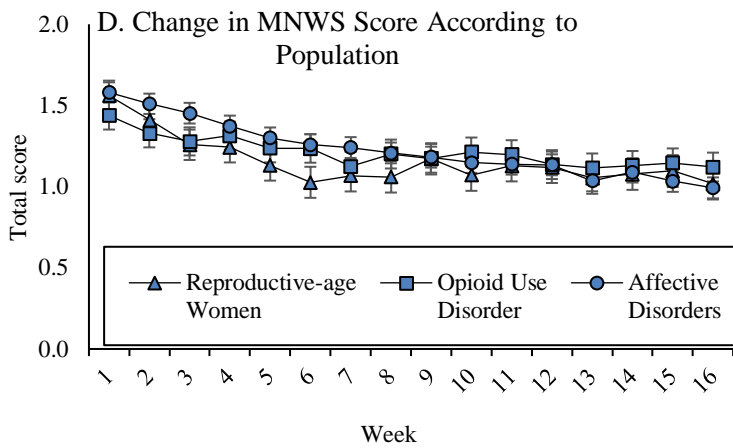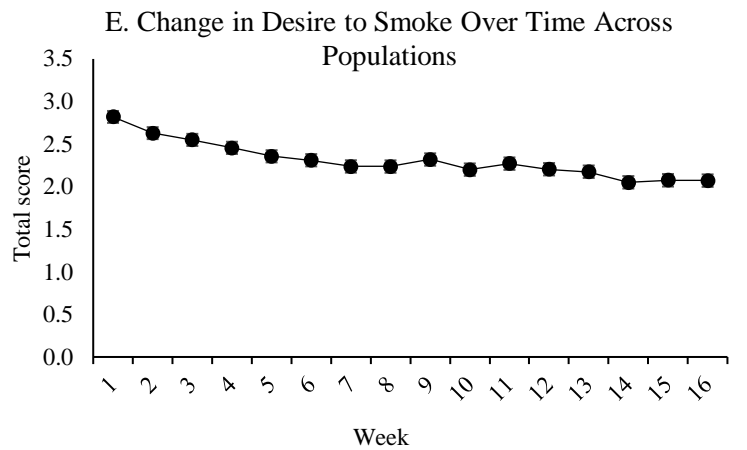

**eFigure 5. Number of Total Cigarettes Smoked Per Day Over Time According to Condition, Across Populations and According to Study Population**

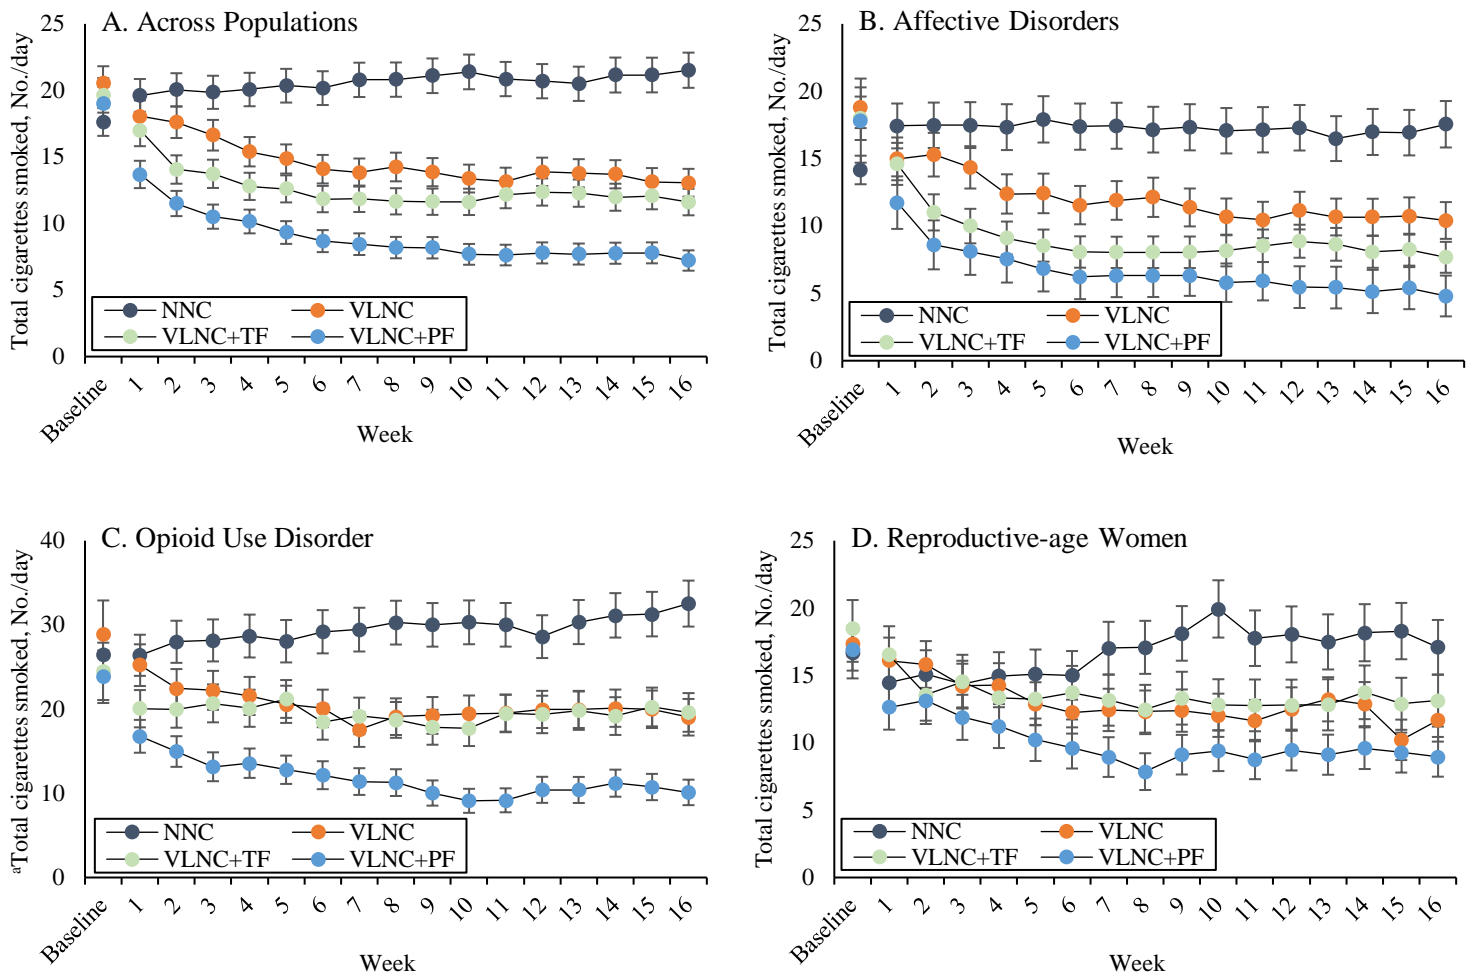

<sup>a</sup>Note: The scale used on the y-axis for the population with opioid use disorder (Panel C) differs from other populations (Panels A, B, and D).

**eFigure 6. Number of Total Cigarettes Smoked Per Day at Week 16 According to Condition, Across Populations and According to Study Population**

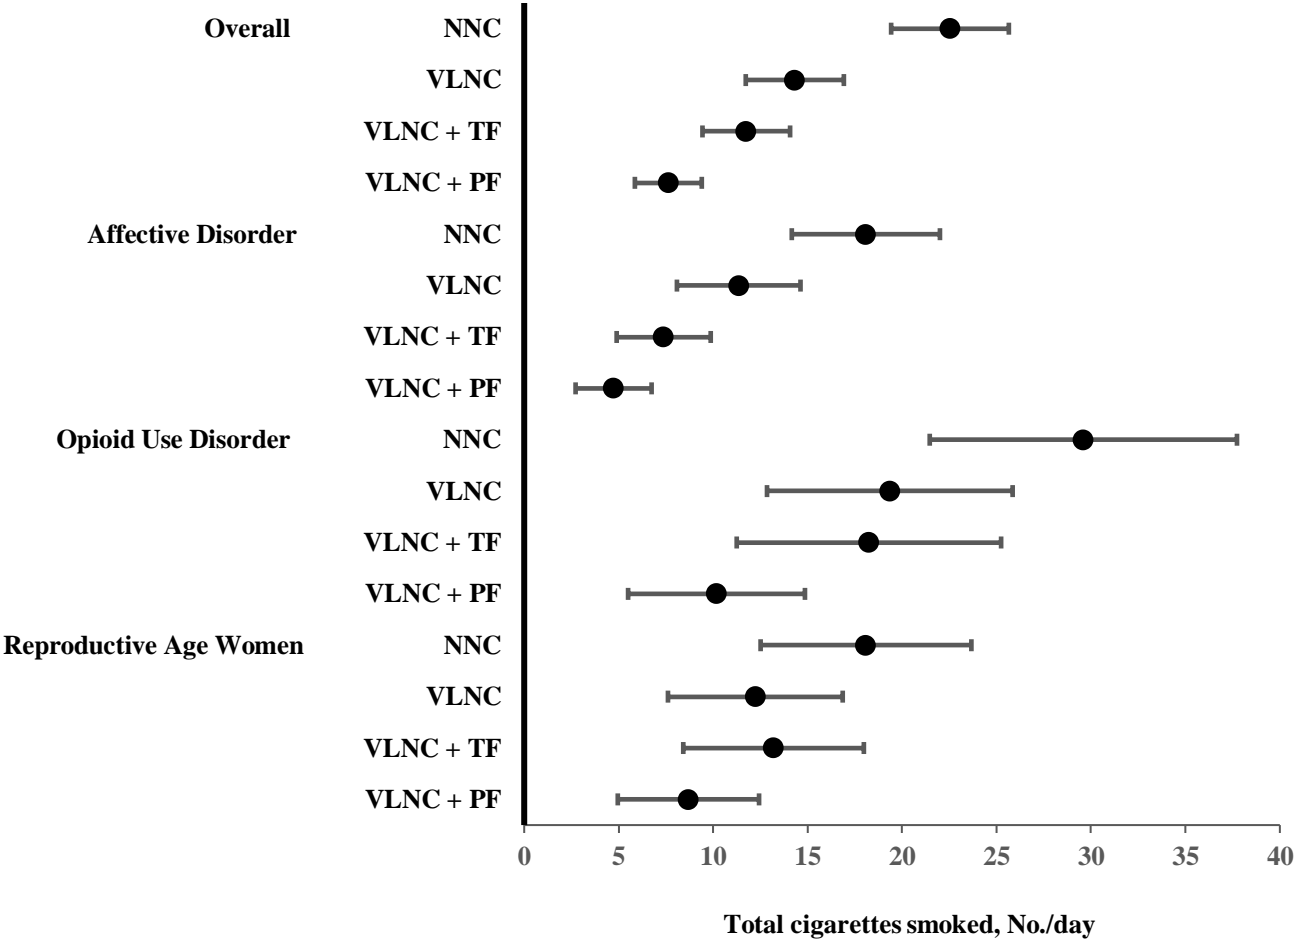



**eFigure 7. Number of Non-study Cigarettes Smoked Per Day According to Condition**

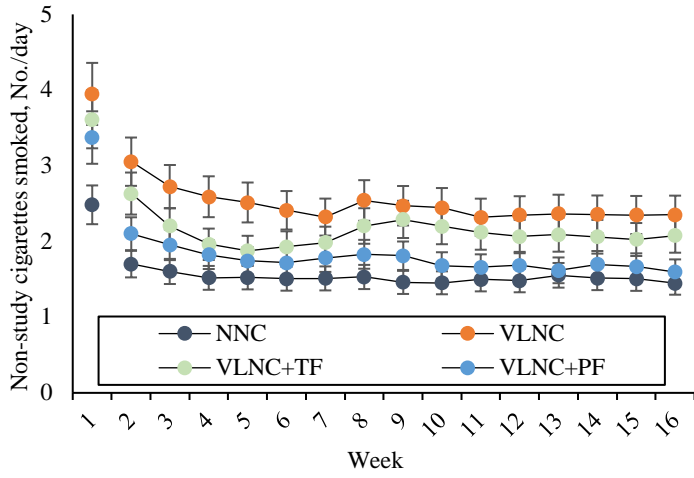

## Smoking Abstinence

There was a significant main effect of condition across populations on LSmean number of trial days without smoking ( $X^2(3)=33.11$ ;  $P<.001$ , eFigure 7), with more days in VLNC+PF ( $23.35\pm 3.93$ ) versus NNC ( $0.73\pm 1.34$ ) ( $z=6.10$ ,  $P<.001$ ), VLNC ( $2.92\pm 1.12$ ) ( $z=3.62$ ,  $P=.002$ ), and VLNC+TF ( $9.04\pm 2.68$ ) ( $z=2.59$ ,  $P=.048$ ). Mean days abstinent in VLNC+TF was greater than NNC ( $z=3.37$ ,  $P=.004$ ) but not VLNC; VLNC days abstinent did not differ significantly from NNC. There were no significant differences by condition on outcomes in the post-trial 24-hr abstinence-test nor 30-day smoking-cessation rates.

**eFigure 8. Cigarette Abstinence According to Condition**

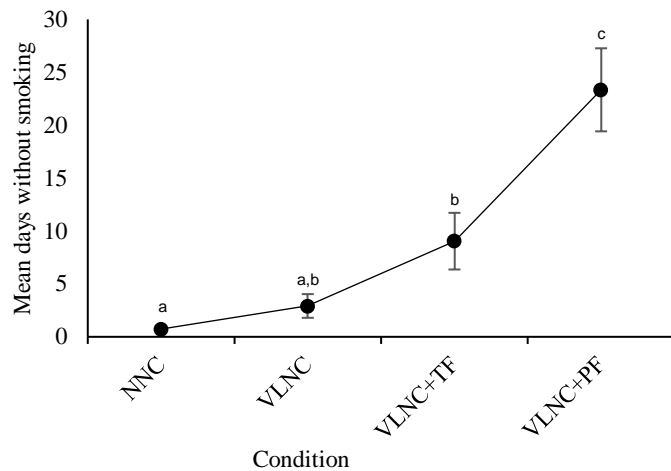

**eFigure 9. Nicotine Dependence Severity and Cigarette Craving According to Condition**

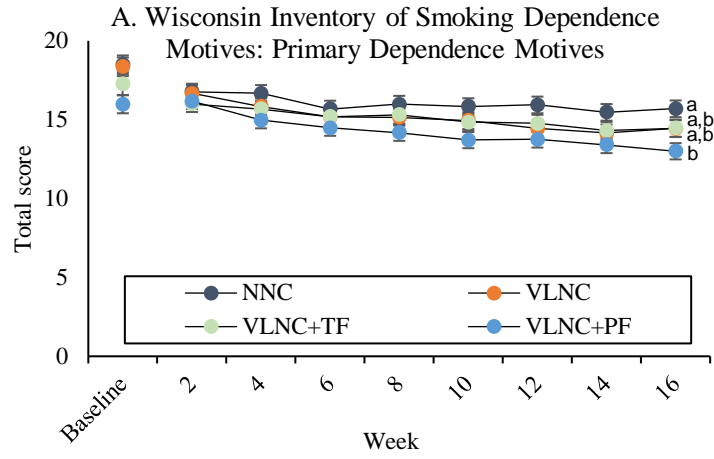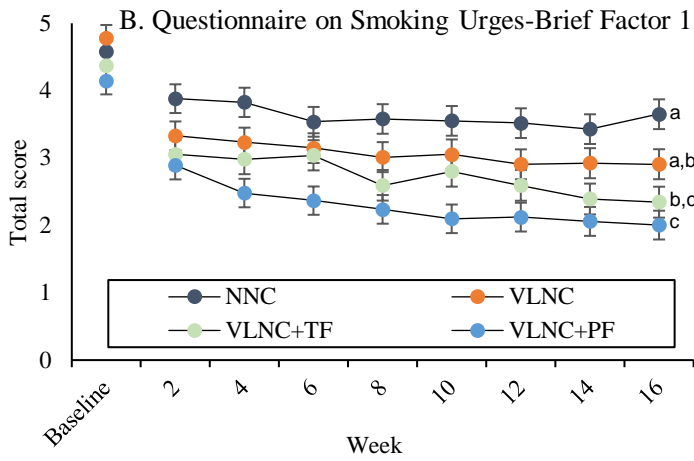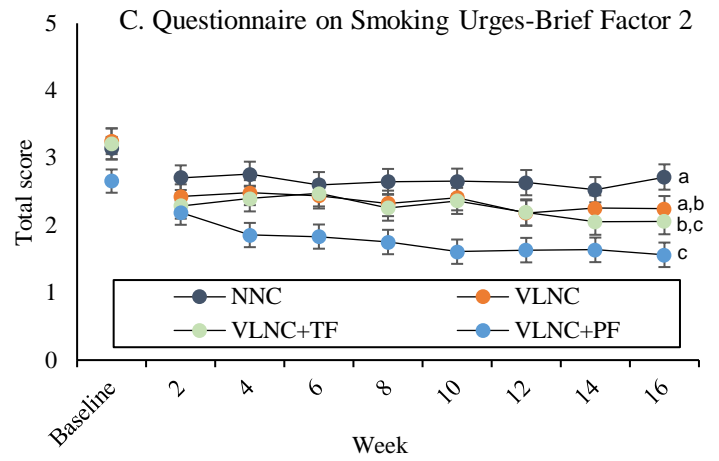

## eTables

### Participants

Only one baseline characteristic (FTND total scores) differentiated completers from dropouts (mean [ $\pm$ SD] = 4.97 $\pm$ 2.23 versus 5.59 $\pm$ 2.07, respectively, P=.044) (eTable 1).

**eTable 1: Participant Characteristics**

|                                                    | Overall<br>n = 326                      | Completers<br>n = 260    | Dropouts<br>n = 66                      | p-value |
|----------------------------------------------------|-----------------------------------------|--------------------------|-----------------------------------------|---------|
| Condition                                          |                                         |                          |                                         | 0.732   |
| NNC Only                                           | 83 (25.46)                              | 67 (25.77)               | 16 (24.24)                              |         |
| VLNCC + PF                                         | 84 (27.77)                              | 70 (26.92)               | 14 (21.21)                              |         |
| VLNCC + TF                                         | 74 (22.70)                              | 57 (21.92)               | 17 (25.76)                              |         |
| VLNCC Only                                         | 85 (26.07)                              | 66 (25.38)               | 19 (28.79)                              |         |
| Population                                         |                                         |                          |                                         | 0.074   |
| Disadvantaged Women                                | 80 (24.54)                              | 57 (21.92)               | 23 (34.85)                              |         |
| Opioid Dependent                                   | 74 (22.70)                              | 63 (24.23)               | 11 (16.67)                              |         |
| Affective Disorders                                | 172 (52.76)                             | 140 (53.85)              | 32 (48.48)                              |         |
| Age (M $\pm$ SD)                                   | 40.09 $\pm$<br>10.79                    | 40.05 $\pm$ 10.76        | 40.21 $\pm$<br>10.98                    | 0.968   |
| Gender (% Female)                                  | 243 (74.54)                             | 193 (74.23)              | 50 (75.76)                              | 0.799   |
| Race/Ethnicity                                     |                                         |                          |                                         | 0.902   |
| Non-Latino White                                   | 262 (80.37)                             | 210 (80.77)              | 52 (78.79)                              |         |
| Non-Latino Black                                   | 33 (10.12)                              | 26 (10.00)               | 7 (10.61)                               |         |
| Latino                                             | 12 (3.68)                               | 10 (3.85)                | 2 (3.03)                                |         |
| Non-Latino Other or >1 race                        | 19 (5.83)                               | 14 (5.38)                | 5 (7.58)                                |         |
| Education                                          |                                         |                          |                                         | 0.916   |
| <High school                                       | 30 (9.20)                               | 24 (9.23)                | 6 (9.09)                                |         |
| High school graduate or equivalent or some college | 201 (61.66)                             | 158 (60.77)              | 43 (65.15)                              |         |
| Associate's degree                                 | 43 (13.19)                              | 35 (13.46)               | 8 (12.12)                               |         |
| >= College graduate                                | 52 (15.95)                              | 43 (16.54)               | 9 (13.64)                               |         |
| Marital Status                                     |                                         |                          |                                         | 0.866   |
| Married                                            | 51 (15.64)                              | 41 (15.77)               | 10 (15.15)                              |         |
| Never married                                      | 180 (55.21)                             | 145 (55.77)              | 35 (53.03)                              |         |
| Divorced, separated, or widowed                    | 95 (29.14)                              | 74 (28.46)               | 21 (31.82)                              |         |
| Primary smoker of mentholated cigarettes           | 131 (40.18)                             | 107 (41.15)              | 24 (36.36)                              | 0.478   |
| Cigarettes smoked per day (M $\pm$ SD)             | 17.40 $\pm$ 8.87                        | 17.14 $\pm$ 8.78         | 18.42 $\pm$ 9.22                        | 0.278   |
| Urine Cotinine Level, ng/ml (M $\pm$ SD)           | 5043.55 $\pm$<br>3680.12<br>20.46 $\pm$ | 5141.61 $\pm$<br>3847.18 | 4660.19 $\pm$<br>2931.27<br>19.88 $\pm$ | 0.973   |
| Breath CO level (M $\pm$ SD)                       | 13.28                                   | 20.60 $\pm$ 13.42        | 12.79                                   | 0.675   |
| Age started smoking regularly (M $\pm$ SD)         | 16.39 $\pm$ 4.26                        | 16.59 $\pm$ 4.28         | 15.61 $\pm$ 4.09                        | 0.050   |

|                                                   |             |             |             |              |
|---------------------------------------------------|-------------|-------------|-------------|--------------|
| Fagerstrom Test for Cigarette Dependence (M ± SD) | 5.09 ± 2.21 | 4.97 ± 2.23 | 5.59 ± 2.07 | <b>0.044</b> |
| Used Other Tobacco Products, Last 30 days         | 23 (7.06)   | 17 (6.54)   | 6 (9.09)    | 0.470        |
| Used E-cigarettes, Last 30 days                   | 42 (12.88)  | 31 (11.92)  | 11 (16.67)  | 0.304        |
| E-cigarette Flavors, Last 30 days                 |             |             |             |              |
| Fruit                                             | 23 (7.06)   | 16 (6.15)   | 7 (10.61)   | 0.207        |
| Menthol or mint                                   | 12 (3.68)   | 7 (2.69)    | 5 (7.58)    | 0.072        |
| Candy or other sweets                             | 4 (1.23)    | 2 (0.77)    | 2 (3.03)    | 0.136        |
| Other                                             | 1 (0.31)    | 0 (0.00)    | 1 (1.52)    | 0.203        |

**Note:** Unless otherwise indicated, data are expressed as number (percentage)

**eTable 2.** E-cigarette flavors selected (VLNC + PF condition).

---

| <b>Week 16</b>   |                         |
|------------------|-------------------------|
| <u>Flavor</u>    | <u># of choices (%)</u> |
| Mango            | 47 (24.87)              |
| Fruit Medley     | 37 (19.58)              |
| Classic Menthol  | 23 (12.17)              |
| Cool Mint        | 20 (10.58)              |
| Classic Tobacco  | 20 (10.58)              |
| Crème Brûlée     | 17 (8.99)               |
| Cool Cucumber    | 16 (8.47)               |
| Virginia Tobacco | 9 (4.76)                |

---

| <b>Across all weeks</b> |                         |
|-------------------------|-------------------------|
| <u>Flavor</u>           | <u># of choices (%)</u> |
| Mango                   | 811 (23.22)             |
| Fruit Medley            | 685 (19.62)             |
| Classic Menthol         | 424 (12.14)             |
| Cool Mint               | 408 (11.68)             |
| Classic Tobacco         | 372 (10.65)             |
| Crème Brûlée            | 323 (9.25)              |
| Cool Cucumber           | 294 (8.42)              |
| Virginia Tobacco        | 175 (5.01)              |

---

## Adverse Events

Most participants reported an adverse event (284/326, 87.1%) (eTables 2-3). There were no significant differences between experimental conditions in incidence, total number, or number of serious or severe adverse events (eTables 2-5).

**eTable 3: Total Number of Adverse Events**

| Adverse Event Description                            | Overall | NNC Only | VLNC Only | VLNC + TF | VLNC + PF |
|------------------------------------------------------|---------|----------|-----------|-----------|-----------|
| Total Number of Events                               | 1225    | 332      | 332       | 261       | 300       |
| BDI Category Increase                                | 167     | 52       | 40        | 34        | 41        |
| CPD Increase > 200%                                  | 15      | 7        | 1         | 6         | 1         |
| OASIS Score Increase                                 | 177     | 52       | 43        | 42        | 40        |
| Blood and lymphatic system disorders                 | 1       | 1        | 0         | 0         | 0         |
| Cardiac disorders                                    | 20      | 6        | 5         | 4         | 5         |
| Ear and labyrinth disorders                          | 3       | 0        | 1         | 0         | 2         |
| Eye disorders                                        | 5       | 1        | 1         | 2         | 1         |
| Gastrointestinal disorders                           | 84      | 15       | 25        | 21        | 23        |
| General disorders and administration site conditions | 103     | 26       | 28        | 21        | 28        |
| Immune system disorders                              | 5       | 3        | 2         | 0         | 0         |
| Infections and infestations                          | 66      | 17       | 24        | 11        | 14        |
| Injury, poisoning and procedural complications       | 27      | 7        | 7         | 5         | 8         |
| Investigations                                       | 5       | 1        | 2         | 1         | 1         |
| Metabolism and nutrition disorders                   | 5       | 0        | 1         | 2         | 2         |
| Musculoskeletal and connective tissue disorders      | 49      | 14       | 16        | 7         | 12        |
| Neoplasms benign, malignant and unspecified          | 4       | 3        | 0         | 0         | 1         |
| Nervous system disorders                             | 61      | 8        | 23        | 19        | 11        |
| Pregnancy, puerperium and perinatal conditions       | 2       | 2        | 0         | 0         | 0         |
| Psychiatric disorders                                | 161     | 54       | 43        | 27        | 37        |
| Renal and urinary disorders                          | 5       | 2        | 2         | 0         | 1         |
| Reproductive system and breast disorders             | 5       | 2        | 1         | 1         | 1         |
| Respiratory, thoracic and mediastinal disorders      | 160     | 38       | 45        | 41        | 36        |
| Skin and subcutaneous tissue disorders               | 7       | 2        | 3         | 1         | 1         |
| Social circumstances                                 | 1       | 1        | 0         | 0         | 0         |
| Surgical and medical procedures                      | 16      | 3        | 4         | 5         | 4         |
| Vascular disorders                                   | 71      | 15       | 15        | 11        | 30        |

**eTable 4: Number of Participants with Any Adverse Event.**

| Adverse Event Description                            | Overall |       | NNC Only |       | VLNC Only |       | VLNC + TF |       | VLNC + PF |       |
|------------------------------------------------------|---------|-------|----------|-------|-----------|-------|-----------|-------|-----------|-------|
|                                                      | n       | %     | n        | %     | n         | %     | n         | %     | n         | %     |
|                                                      | 284     | 87.1% | 74       | 89.2% | 75        | 88.2% | 63        | 85.1% | 72        | 85.7% |
| BDI Category Increase                                | 109     | 33.4% | 29       | 34.9% | 29        | 34.1% | 26        | 35.1% | 25        | 29.8% |
| CPD Increase > 200%                                  | 10      | 3.1%  | 4        | 4.8%  | 1         | 1.2%  | 4         | 5.4%  | 1         | 1.2%  |
| OASIS Score Increase                                 | 126     | 38.7% | 33       | 39.8% | 31        | 36.5% | 31        | 41.9% | 31        | 36.9% |
| Blood and lymphatic system disorders                 | 1       | 0.3%  | 1        | 1.2%  | 0         | 0.0%  | 0         | 0.0%  | 0         | 0.0%  |
| Cardiac disorders                                    | 15      | 4.6%  | 4        | 4.8%  | 3         | 3.5%  | 3         | 4.1%  | 5         | 6.0%  |
| Ear and labyrinth disorders                          | 2       | 0.6%  | 0        | 0.0%  | 1         | 1.2%  | 0         | 0.0%  | 1         | 1.2%  |
| Eye disorders                                        | 5       | 1.5%  | 1        | 1.2%  | 1         | 1.2%  | 2         | 2.7%  | 1         | 1.2%  |
| Gastrointestinal disorders                           | 59      | 18.1% | 10       | 12.0% | 17        | 20.0% | 15        | 20.3% | 17        | 20.2% |
| General disorders and administration site conditions | 83      | 25.5% | 19       | 22.9% | 25        | 29.4% | 17        | 23.0% | 22        | 26.2% |
| Immune system disorders                              | 5       | 1.5%  | 3        | 3.6%  | 2         | 2.4%  | 0         | 0.0%  | 0         | 0.0%  |
| Infections and infestations                          | 57      | 17.5% | 16       | 19.3% | 23        | 27.1% | 8         | 10.8% | 10        | 11.9% |
| Injury, poisoning and procedural complications       | 19      | 5.8%  | 6        | 7.2%  | 4         | 4.7%  | 4         | 5.4%  | 5         | 6.0%  |
| Investigations                                       | 5       | 1.5%  | 1        | 1.2%  | 2         | 2.4%  | 1         | 1.4%  | 1         | 1.2%  |
| Metabolism and nutrition disorders                   | 5       | 1.5%  | 0        | 0.0%  | 1         | 1.2%  | 2         | 2.7%  | 2         | 2.4%  |
| Musculoskeletal and connective tissue disorders      | 46      | 14.1% | 11       | 13.3% | 16        | 18.8% | 7         | 9.5%  | 12        | 14.3% |
| Neoplasms benign, malignant and unspecified          | 4       | 1.2%  | 3        | 3.6%  | 0         | 0.0%  | 0         | 0.0%  | 1         | 1.2%  |
| Nervous system disorders                             | 50      | 15.3% | 7        | 8.4%  | 18        | 21.2% | 15        | 20.3% | 10        | 11.9% |
| Pregnancy, puerperium and perinatal conditions       | 2       | 0.6%  | 2        | 2.4%  | 0         | 0.0%  | 0         | 0.0%  | 0         | 0.0%  |
| Psychiatric disorders                                | 99      | 30.4% | 28       | 33.7% | 28        | 32.9% | 19        | 25.7% | 24        | 28.6% |
| Renal and urinary disorders                          | 5       | 1.5%  | 2        | 2.4%  | 2         | 2.4%  | 0         | 0.0%  | 1         | 1.2%  |
| Reproductive system and breast disorders             | 4       | 1.2%  | 1        | 1.2%  | 1         | 1.2%  | 1         | 1.4%  | 1         | 1.2%  |
| Respiratory, thoracic and mediastinal disorders      | 89      | 27.3% | 23       | 27.7% | 28        | 32.9% | 19        | 25.7% | 19        | 22.6% |
| Skin and subcutaneous tissue disorders               | 7       | 2.1%  | 2        | 2.4%  | 3         | 3.5%  | 1         | 1.4%  | 1         | 1.2%  |
| Social circumstances                                 | 1       | 0.3%  | 1        | 1.2%  | 0         | 0.0%  | 0         | 0.0%  | 0         | 0.0%  |
| Surgical and medical procedures                      | 14      | 4.3%  | 2        | 2.4%  | 3         | 3.5%  | 5         | 6.8%  | 4         | 4.8%  |
| Vascular disorders                                   | 48      | 14.7% | 11       | 13.3% | 13        | 15.3% | 8         | 10.8% | 16        | 19.0% |



**eTable 5: Count of Serious and Severe Adverse Events**

| <b>Description</b>                                   | <b>Overall</b> | <b>NNC Only</b> | <b>VLNC Only</b> | <b>VLNC + TF</b> | <b>VLNC + PF</b> |
|------------------------------------------------------|----------------|-----------------|------------------|------------------|------------------|
| Number of serious adverse events <sup>a</sup>        | 19             | 9               | 4                | 4                | 2                |
| Events related, probably related or possibly related | 4              | 3               | 0                | 1                | 0                |
| Number of severe adverse events                      | 60             | 12              | 12               | 14               | 22               |
| Events related, probably related or possibly related | 24             | 6               | 3                | 6                | 9                |

**eTable 6. Description of Serious and Severe Adverse Events**

| <b>Seriousness</b> | <b>Severity</b> | <b>Treatment Group</b> | <b>Type of Event</b>                           |
|--------------------|-----------------|------------------------|------------------------------------------------|
| Serious            | Mild            | NNC Only               | BDI Category Increase                          |
| Serious            | Mild            | NNC Only               | Irritability                                   |
| Serious            | Mild            | NNC Only               | OASIS Score Increase                           |
| Serious            | Mild            | NNC Only               | Pregnancy                                      |
| Serious            | Mild            | NNC Only               | Hypertension                                   |
| Serious            | Moderate        | NNC Only               | Tumors on parotid gland                        |
| Serious            | Moderate        | NNC Only               | Hysterectomy                                   |
| Serious            | Moderate        | VLNC Only              | Chest pain                                     |
| Serious            | Moderate        | VLNC + TF              | Dehydration                                    |
| Serious            | Severe          | NNC Only               | Esophageal perforation                         |
| Serious            | Severe          | NNC Only               | Psychiatric disorders (hospitalization)        |
| Serious            | Severe          | VLNC Only              | Fever                                          |
| Serious            | Severe          | VLNC Only              | Renal calculi (kidney stones)                  |
| Serious            | Severe          | VLNC Only              | Pneumonia                                      |
| Serious            | Severe          | VLNC Only              | Stent placement surgery for blood clots        |
| Serious            | Severe          | VLNC + TF              | Cocaine overdose                               |
| Serious            | Severe          | VLNC + TF              | Hypertension                                   |
| Serious            | Severe          | VLNC + PF              | Hyperglycemia                                  |
| Serious            | Severe          | VLNC + PF              | Pneumonia                                      |
| Serious            | Fatal           | VLNC + TF              | Death                                          |
| Not Serious        | Severe          | NNC Only               | Atrial fibrillation                            |
| Not Serious        | Severe          | NNC Only               | BDI Category Increase                          |
| Not Serious        | Severe          | NNC Only               | Hypertension                                   |
| Not Serious        | Severe          | NNC Only               | Hypertension                                   |
| Not Serious        | Severe          | NNC Only               | Hypertension                                   |
| Not Serious        | Severe          | NNC Only               | Hypertension                                   |
| Not Serious        | Severe          | NNC Only               | Hypertension                                   |
| Not Serious        | Severe          | NNC Only               | Hypertension                                   |
| Not Serious        | Severe          | NNC Only               | Toothache                                      |
| Not Serious        | Severe          | NNC Only               | Trauma related psychiatric event with ER visit |
| Not Serious        | Severe          | VLNC Only              | BDI Category Increase                          |
| Not Serious        | Severe          | VLNC Only              | Bruising                                       |
| Not Serious        | Severe          | VLNC Only              | Hypertension                                   |
| Not Serious        | Severe          | VLNC Only              | Hypertension                                   |
| Not Serious        | Severe          | VLNC Only              | Hypertension                                   |
| Not Serious        | Severe          | VLNC Only              | Hypertension                                   |
| Not Serious        | Severe          | VLNC Only              | Hypertension                                   |
| Not Serious        | Severe          | VLNC Only              | Hypertension                                   |
| Not Serious        | Severe          | VLNC Only              | Hypertension                                   |
| Not Serious        | Severe          | VLNC Only              | Hypertension                                   |
| Not Serious        | Severe          | VLNC Only              | Hypertension                                   |
| Not Serious        | Severe          | VLNC Only              | Hypertension                                   |
| Not Serious        | Severe          | VLNC Only              | Hypertension                                   |
| Not Serious        | Severe          | VLNC Only              | Hypertension                                   |
| Not Serious        | Severe          | VLNC Only              | Hypertension                                   |
| Not Serious        | Severe          | VLNC Only              | Hypertension                                   |
| Not Serious        | Severe          | VLNC Only              | Hypertension                                   |
| Not Serious        | Severe          | VLNC Only              | Hypertension                                   |
| Not Serious        | Severe          | VLNC Only              | Hypertension                                   |
| Not Serious        | Severe          | VLNC Only              | Hypertension                                   |
| Not Serious        | Severe          | VLNC Only              | Hypertension                                   |
| Not Serious        | Severe          | VLNC Only              | Hypertension                                   |
| Not Serious        | Severe          | VLNC Only              | Hypertension                                   |
| Not Serious        | Severe          | VLNC Only              | Hypertension                                   |
| Not Serious        | Severe          | VLNC Only              | Hypertension                                   |
| Not Serious        | Severe          | VLNC Only              | Hypertension                                   |
| Not Serious        | Severe          | VLNC + TF              | BDI Category Increase                          |
| Not Serious        | Severe          | VLNC + TF              | Cluster Migraines                              |
| Not Serious        | Severe          | VLNC + TF              | Cough                                          |
| Not Serious        | Severe          | VLNC + TF              | Hypertension                                   |
| Not Serious        | Severe          | VLNC + TF              | Hypertension                                   |
| Not Serious        | Severe          | VLNC + TF              | Hypertension                                   |
| Not Serious        | Severe          | VLNC + TF              | Hypertension                                   |
| Not Serious        | Severe          | VLNC + TF              | Hypertension                                   |
| Not Serious        | Severe          | VLNC + TF              | Hypertension                                   |
| Not Serious        | Severe          | VLNC + TF              | Hypertension                                   |
| Not Serious        | Severe          | VLNC + TF              | Hypertension                                   |
| Not Serious        | Severe          | VLNC + TF              | Hypertension                                   |
| Not Serious        | Severe          | VLNC + TF              | Hypertension                                   |
| Not Serious        | Severe          | VLNC + TF              | Hypertension                                   |
| Not Serious        | Severe          | VLNC + PF              | BDI Category Increase                          |
| Not Serious        | Severe          | VLNC + PF              | Hypertension                                   |
| Not Serious        | Severe          | VLNC + PF              | Hypertension                                   |
| Not Serious        | Severe          | VLNC + PF              | Hypertension                                   |

|             |        |           |                |
|-------------|--------|-----------|----------------|
| Not Serious | Severe | VLNC + PF | Hypertension   |
| Not Serious | Severe | VLNC + PF | Hypertension   |
| Not Serious | Severe | VLNC + PF | Hypertension   |
| Not Serious | Severe | VLNC + PF | Hypertension   |
| Not Serious | Severe | VLNC + PF | Hypertension   |
| Not Serious | Severe | VLNC + PF | Hypertension   |
| Not Serious | Severe | VLNC + PF | Hypertension   |
| Not Serious | Severe | VLNC + PF | Hypertension   |
| Not Serious | Severe | VLNC + PF | Hypertension   |
| Not Serious | Severe | VLNC + PF | Hypertension   |
| Not Serious | Severe | VLNC + PF | Hypertension   |
| Not Serious | Severe | VLNC + PF | Hypertension   |
| Not Serious | Severe | VLNC + PF | Hypertension   |
| Not Serious | Severe | VLNC + PF | Hypertension   |
| Not Serious | Severe | VLNC + PF | Hypertension   |
| Not Serious | Severe | VLNC + PF | Nasal fracture |

---
