# Supplementary material for: Reduced Nicotine Cigarettes and E-Cigarettes in High-Risk Populations: 3 Randomized Clinical Trials
Source: PubMed Central journal article supplement (PMC11380105; doi:10.1001/jamanetworkopen.2024.31731), 2024-09-06
Supplement: jamanetwopen-e2431731-s003.pdf [file jamanetwopen-e2431731-s003.pdf]

## Data Sharing Statement

Higgins. Reduced Nicotine Cigarettes and E-Cigarettes in High-Risk Populations. *JAMA Netw Open*. Published September 06, 2024. doi:10.1001/jamanetworkopen.2024.31731

### Data

**Data available:** Yes

**Data types:** Deidentified participant data, Other (please specify)

**Additional Information:** Study protocols

**How to access data:** National Institute of Drug Abuse's data sharing site (<https://datashare.nida.nih.gov/index.php/>)

**When available:** beginning date: 12-30-2028

### Supporting Documents

**Document types:** Statistical/analytic code, Other (please specify)

**Additional Information:** study protocols

**How to access documents:** National Institute of Drug Abuse's data sharing site (<https://datashare.nida.nih.gov/index.php/>)

**When available:** beginning date: 12-30-2028

### Additional Information

**Who can access the data:** researchers whose proposed use of the data has been approved

**Types of analyses:** for any purpose

**Mechanisms of data availability:** without investigator support
